# Supplementary material for: Mapping the Phosphoproteome of Influenza A and B Viruses by Mass Spectrometry
Source: PLoS Pathog. 2012 Nov 8;8(11):e1002993. doi: 10.1371/journal.ppat.1002993 (PMC3493474; doi:10.1371/journal.ppat.1002993)
Supplement: Figure S2 — Coverage of sequences. The full sequences of all proteins to which peptides were matched, with peptides assigned by CPFP shaded. Peptides with N-terminal acetylation (Table S3) were scored separately and are not necessarily shown. (PDF) [file ppat.1002993.s002.pdf]

# WSN (not enriched for phosphopeptides)

## PB2

MERIKELRNL [MSQSR](#)TREIL TKTTVDHMAI IKKYTSGRQE KNPALRMKWM MAMKYPTIAD [KRITEMIPER](#) [NEOGOTLWSK](#)  
[MNDAGSDRVM](#) [VSLPVTWVN](#) [RNGPVTSTVH](#) [YPKIYKYTFE](#) KVERLK[HGTF](#) [GPVHFR](#)NQVK IRRRVDINPG [HADLSAKEAQ](#)  
[DVIMEVFFPN](#) [EVGARILTSE](#) [SOLTTTKEKK](#) [EELQGCKISP](#) [LMVAYMLERE](#) LVRKTR[FLPV](#) [AGGTSSVYIE](#) [VLHLTGQTCW](#)  
[EQMYTPGGEA](#) [RNDVDQSLT](#) [TAARNIVRRA](#) [TVSADPLASL](#) [LEMCHSTQIG](#) [GIRMVNLRQ](#) [NPTEEQAVDI](#) [CKAAMGLRIS](#)  
[SSFSFGGFTF](#) [KRTSGSSVKR](#) [EEEVLGTNLQ](#) [TLKIRVHEGY](#) [EEFTMVGRRA](#) [TAILRKATR](#) [LIQLIVSGRD](#) [EQSIAEATIV](#)  
[AMVFSQEDCM](#) [IKAVRGDLNF](#) [VNRANQLRNP](#) [MHQLLRHFQK](#) DAKVLFQNWG IESIDNVMMG IGILPDMTPS TEMSMRGVRI  
SKMGVDEYSS [AEKIVVSIDR](#) FLRVDRQGRN [VLLSPEEVSE](#) [TOGTEK](#)LTIT YSSMMWEIN GPESVLVNTY QWIIRNWETV  
KIQWSQNPTM [LYNKMEFEFF](#) [QSLVPK](#)AVRG [QYSGFVRTLF](#) [QOMRDVLGTF](#) [DTAQIKLLP](#) [FAAAPPKQSG](#) [MQFSSLTINV](#)  
RSGSMRILVR [GNSPVFNYNK](#) TTKRLTVLGK [DAGPLTDPD](#) [EGTAGVESAV](#) [LRGFLILGKE](#) [DRRYGPALST](#) [NELSNLAKGE](#)  
KANVLIGQGD [VVLVMKRKRN](#) [SSILTDSQTA](#) [TKRIRMAIN](#)

## PB1

[MDVNPTLLFL](#) [KVPAQNAIST](#) [TFPYTGDPPI](#) [SHGTGTGYTM](#) [DTVNRTHQYS](#) [ERGRWTTNTE](#) TGAPQLNPID GPLPEDNEPS  
GYAQTDCLVE AMAFLEESHP GIFETSCLET MEVWQTRVD [KLTOGRQTYD](#) [WTLNRNQPA](#) [TALANTIEVE](#) [RNSGLTANES](#)  
[GRLIDFLKDV](#) [MESMNKEEME](#) [ITTHFQKRKR](#) VRDNMTKKMV TQRTIGKRKQ RLNKRSLYLR [ALTLTNTMTKD](#) AERGKLRRA  
[IATPGMQIRG](#) [FVYFVETLAR](#) [SICEKLEQSG](#) [LPVGGNEKKA](#) KLANVVRKMM [TNSQDTEISF](#) [TITGDNTHWN](#) ENQNRPMFLA  
[MITYITRNQP](#) [EWFNRVLSTA](#) [PIMFSNM](#)MAR LGKGYMFESK SMKLRTOIPA [EMLASIDLKY](#) [FNDSTRKKIE](#) KIRPLIDGT  
ASLSPGMMMG MFNMLSTVLG VSILNLGQKR HTKTTYWDG [LQSSDDFALI](#) [VNAPNHGEGQ](#) [AGVNRFYRTC](#) KLLGINMSK  
KSYINR[TGTF](#) [EFTSFFYRYG](#) [FVANFSMELP](#) [SFGVSGINES](#) [ADMSIGVTVI](#) [KNMINNDLG](#) [PATAQMALQL](#) [FIKDYRYTYR](#)  
CHRGDTQIQOT [RFSFEIKLW](#) [EQTHSKAGLL](#) [VSDGGPNLYN](#) [IRNLHIPEVC](#) [LKWELMDEDY](#) [QGRLCNPLNP](#) [FVNHDIESV](#)  
[NNAVIMPAHG](#) [PAKNMEYDAV](#) [ATTHSWIPKR](#) NR[SILNTSQR](#) [GILEDEQMYQ](#) [KCCNLFEKFF](#) [PSSSYRRPVG](#) [ISSMVEAMVS](#)  
RARIDAR[IDF](#) [ESGRIKKEEF](#) [TEIMKICSTI](#) [EELRRQK](#)

## PA

MEDFVRQCFN [PMIVELA](#)EKA [MKEYGEDLKI](#) [ETNK](#)FAAICT HLEVCFMYS D FHFIDEQGES IVVELGDPNA LLK[HRFEITIE](#)  
[GRDRTIAWTV](#) [INSICNTTGA](#) [EKPKFLPDLY](#) [DYKKNR](#)[FIET](#) [GVTRREVHIY](#) [YLEK](#)ANKIKS EK[THIHIFSF](#) [TGEEMATKAD](#)  
[YTLDDESRAR](#) IKTRLFTIRQ EMASRGLWDS [FRQSERGEET](#) [TEERFEITGT](#) [MRKLADQSLP](#) [PNFSSLENFR](#) [AYVDGFEPNG](#)  
[YIEGKLSQMS](#) KEVNARIEFP LK[STPRPLRL](#) [PDGPPCSQRS](#) [KFLLDALKL](#) [SIEDPSHEGE](#) [GIPLYDAIKC](#) MRTFFGWKEP  
[NVYKPHKEGI](#) [PNPYLLSWKQ](#) [VLAELQDIEI](#) [EEKIPRTKNM](#) KKTSLQKWL [GENMAPEKVD](#) [FDDCKDVGDL](#) [KQYDSDEPEL](#)  
[RSLASWIQNE](#) [FNKACELTDS](#) [SWIEDELTEIG](#) [DAAPIEHAS](#) [MRRNYFTA](#)EV [SHCRATEYIM](#) [KGVYINTALL](#) [NASCAAMDDF](#)  
[QLIPMISKCR](#) TKEGRKTNL [YGFIIK](#)GRSH LRNDTDVWNE [VSMEFSLTDP](#) [RLEPHKWEKY](#) [CVLEVGDMLL](#) [RSAIGHVSRP](#)  
[MFLYVRTNGT](#) SKIKMKWGM [MRRCLLOSLQ](#) [QIESMIEAES](#) [SVKEKDMTKE](#) [FFENKSETWP](#) [VGESPKGVEE](#) [GSIGKVCRTL](#)  
LAK[SVFNSLY](#) [ASPOLEGFSA](#) [ESRKLLLIQV](#) [ALRDNLEPGT](#) FDLGGLEYAI EECINDPWV LLNASWFNSF LTHALR

## HA

MKAFVLVLLY AFVATDADTI CIGYHANNST DTVDITFEKN [VAVTHSVNLL](#) [EDRHNGKLCK](#) [LKGIAPLQLG](#) [KCNITGWLLG](#)  
[NPECDSLPA](#) [RSWSYIVETP](#) [NSEGACYPG](#) [DFIDYEELRE](#) [QLSSVSLSLR](#) [FEIFPKESSW](#) [PNHTFNGVTV](#) [SCSHRGKSSF](#)  
[YRNLLWLTCK](#) [GDSYPKLNTS](#) [YVNNKGKEVL](#) [VLWGVHHPSS](#) [SDEQQSLYSN](#) [GNAYVSVASS](#) [NYNRRFTPEI](#) [AARPKVKDQH](#)  
[GRMNYWTLL](#) [EPGDTIIFEA](#) [TGNLIAPWYA](#) [FALS](#)RGFESG IITSNASMHE CNTK[CQTPQG](#) [SINSNLPFQN](#) [IHPVTIGCEP](#)  
[KYVRSTKLRM](#) VTGLRNPIS [QYRGLEGAIA](#) [GFIEGGWTGM](#) [TDGWYGYHHQ](#) [NEQSGGYAAD](#) [QKSTQNAING](#) [ITNKVNSVIE](#)  
[KMNTQETAVG](#) [KEFNLEKRM](#) [ENLNKKVDDG](#) [FLDIWTYNAE](#) [LLVLLNERIT](#) [LDFHDLNVKN](#) [LYEKVKSQKL](#) [NNAKEIGNGC](#)  
[FEFYHKCDNE](#) [CMESVRNGTY](#) [DYPKYSEESK](#) [LNREKIDGVK](#) LESMGVYQIL AIYSTVASSL VLLVSLGATS FWMCSNGSLQ

## NP

CRICI  
MATKGTRSY [EQMETDGERO](#) [NATEIR](#)ASVG [KMIDGIGRFY](#) [IQMCTELKLS](#) [DYEGLRIONS](#) [LTIERMVL](#)SA [FDERRNKYLE](#)  
[EHPSAGKDPK](#) [KTGGPIYRRV](#) DGKWR[RELIL](#) [YDKEEIRRIW](#) [RQANNGDDAT](#) [AGLTHMMIWH](#) [SNLNDATYQR](#) TRALVRTGMD  
PR[MCSLMQGS](#) [TLPRRSGAAG](#) [AAVKGVGTMV](#) [MELIRMIKRG](#) [INDRNFWRGE](#) NGRRTRIAYE [RMCNILKXGE](#) [QTAAQRTMVD](#)  
QVRESNRPGN [AEFEDILFLA](#) [RSALILRGSV](#) [AHKSCLPACV](#) [YGSVASGYD](#) [FEREGYSLVG](#) [IDPFRLLQNS](#) [QVYSILRPNE](#)  
[NPAHKSQLVW](#) [MACHSAAFED](#) [LRVSSFIRGT](#) [KVVPRGKLST](#) [RGVQIASNEN](#) [METMESSTLE](#) [LRSRYWAIRT](#) [RSGGNTNQQR](#)  
[ASSGQISIQP](#) [TFSVQRNLPE](#) [DRPTIMAAFT](#) [GNTEGRSDM](#) [RTEIRLMES](#) [ARPEVSVFQG](#) [RGVFELSDEK](#) [ATSPIVPSFD](#)  
[MSNEGSYFFG](#) [DNAEEYDN](#)

## NA

MNPNQKIITI GSICMVGII SLILQIGNII SIWISHSIQT GNQHTGICN QGSITYKVA GQDSTSVILT GNSSLCPIRG  
[WAIH](#)SKDNGI [RIGSKGDVFE](#) [IREPFISCSH](#) [LECRTEFLTO](#) [GALLNDKHSR](#) [GTFKDRSPYR](#) [ALMSCPVGEA](#) [PSPYNSRFES](#)  
[VAWSASACHD](#) [GMGWLITIGIS](#) [GPDDGAVAVL](#) [KYNGIITETI](#) [KSWRKNILRT](#) [QSECTCVNG](#) [SCFTIMTDGP](#) [SDGLASYKIF](#)  
KIEKGKVTKS [IELNAPNSHY](#) [EECSCTPDGT](#) [KVMCVCRDNW](#) [HGSNRPWVSF](#) [QONLDYKIGY](#) [ICSGVFGDNP](#) [RPKDGTS](#)CG  
[PVSADGANGV](#) [KGSFYKYNGG](#) [VWIGRTKSDS](#) SRHGFEMIWD [PNGWTETDSR](#) [FSMRQDVVAM](#) [TDRSGYSGSF](#) [VQHPPELTGLD](#)  
[CMRPFVWEL](#) [IRGLPEEDAT](#) [WTSGSTISFC](#) [GVNGDTVDSW](#) [WPDGAELPFT](#) [IDK](#)

## M1

[MSLLTEVETY](#) [VLSIVPSGPL](#) [KAETIAQRLED](#) [VFAGKNTDLE](#) [VLMEWLKTRP](#) [ILSPLTKGIL](#) [GFVFTLTVPS](#) [ERGLQRRRFV](#)  
[QNALNGNGDP](#) [NNMDKAVKLY](#) RKLK[REITFH](#) [GAKEIALSYS](#) [AGALASCMGL](#) [TYNRMGAVTT](#) [EVAFGLVCAT](#) [CEQIADSOHR](#)  
[SHRQMVTTTN](#) [PLIRHENRMV](#) [LASTTAKAME](#) [QMAGSSEQAA](#) [EAMDIASQAR](#) [QMVQAMRTIG](#) [THPSSSAGLK](#) [DDLLENLQAY](#)  
[QKRMGVQMQR](#) FK

## M2

[MSLLTEVETP](#) [IRNEWGCR](#)CN DSSDPLVIAA NIIEILHLIL WILDRLFFKC IYRRFKYGLK [RGPSTEGVPE](#) [SMREEYRKEQ](#)  
[QNAVDDDDGH](#) [FVNIELE](#)

## NS1

MDPNTVSSFQ VDCFLVHVRK [RVADQELGDA](#) [PFLDR](#)LRRDQ KSLRGRGSTL [GLDIETATRA](#) GKQIVER[ILK](#) [EESDEALKMT](#)  
[MASVPASRYL](#) [TDMTEEMSR](#) [HWFMLMPKQK](#) [VAGPLCIRMD](#) [QAIMDKNITL](#) [KANFSVIFDR](#) [LETLLILLRAF](#) [TEEGTIVGTEI](#)  
[SPLPSLPGHT](#) [DEDVKNNAVIG](#) [LIGGLEWNNN](#) [TVRVSETLQR](#) [FAWRSSNENG](#) [RPPLTPKQKR](#) [KMAGTIRSEV](#)

## NEP

MDPNTVSSFQ DILMRMSKMQ [LGSSSEDLNG](#) [IITQFESLKL](#) [YRDSLGEAVM](#) [RMGDLHSLQN](#) [RNGKWREQLG](#) [QKFEEIRWLI](#)  
[EEVRHRLKIT](#) [ENSFEQITFM](#) [QALQLLLEVE](#) [QEIRTF](#)SFQL I

# WSN (enriched for phosphopeptides)

PB2

MERIKELRNL MSQSRTREIL TK**TTVDHMAI** **IK**KYTSGRQE KNPALRMKWM MAMK**YPITAD** **KR**ITEMIPER NEQGQTLWSK  
MNDAGDSR**VM** **VS**PLAVT**WMN** **RNG**PVTST**VH** **YPK**IKYTYFE KVERLK**HGTF** **GPV**HFRNQVK IRRR**VDINPG** **HAD**L**SAKEAQ**  
**DVIMEV**VFPN **EVGAR**ILT**SE** **SQ**LTT**IK**EKK EELQGCK**ISP** **LMV**AYMLERE LVRKTR**FLPV** **AGG**TSS**VYIE** **CH**HLTQGT**CV**  
**EQMYTP**GGEA **RND**VDQSL**I** **IAARN**IVR**RA** **TVS**ADPLAS**L** **LEM**CHSTQ**IG** **GIRM**VNILRQ **NPTEE**QAVD**I** **CKA**AMGLR**IS**  
**SSFS**FGG**TFE** **KRT**SGSS**VKR** **EEE**VL**TGNLQ** **TLK**IR**VHEGY** **EEFT**MVGR**RA** TAILRKATR**R** **L**IQLT**VSGRD** **EQS**IAEAT**IV**  
**AMVFS**QED**CM** **IK**AVRGDLN**F** VNRA**NQR****LNP** **MH**QLLR**HFQK** DAKVLFQNW**G** IESIDNV**MGM** IGILPDM**TPS** TEMSMRG**VRI**  
SKMGVDEYSS AEKIVVSID**R** FLRVRDQ**RGN** **VLL**SP**EEVSE** **TQG**TEKLT**IT** YSSMMW**IEIN** GPESVLV**NTY** QWII**RNWETV**  
**K**TOW**SQNP****TM** **LYN**KMEFE**FE** **QSL**V**PK**AVRG QYSGFVR**TLE** **QQM**RDVL**GTF** **DTA**Q**IKLLP** **FAA**APP**KQSG** **MQF**SSL**TINV**  
**R**SGSMR**ILVR** GNSPVFN**YNK** TTKRLTV**L**GK **DAG**PL**TEDPD** **EGT**AG**VESAV** **LRG**FL**ILGKE** **DRR**YGPAL**ST** **NEL**SNLAK**GE**  
KANVLIGQGD VVLMKRR**RN** SSILTD**SQTA** TKRIR**MAIN**

PB1

MDVNPTLL**FL** **K**VPAQNA**IST** **TF**PYTG**DP**PY **SHG**TGT**GYTM** **D**TVNR**THQYS** **ER**GRWTT**NTE** TGAPQLNP**ID** GPLPED**NEPS**  
GYAQ**TD**CVLE AMAFLEES**HP** GIFETS**CLET** MEVVQ**QTRVD** KL**TQ**GR**QTYD** **WTL**NR**NQPA****A** **TAL**ANTIE**VF** **R**SG**LTANES**  
**GR**LID**FLKDV** **MES**MN**KEEME** **I**TT**HFQ**RKR**R** VRDNMT**KKMV** TQRTIG**KRQK** RL**NKRSY**L**R** **ALT**LN**TMTKD** AERGK**LKRR****A**  
**IAT**PG**MIQIR** **FVY**FVET**LAR** **S**ICE**KLEQSG** **LPV**GGNE**KKA** KLANVVR**KMM** **TNS**QDTE**ISE** **TIT**GDNT**KWN** ENQNP**RFLA**  
**M**ITY**ITR**NQ**P** EWFNR**VL**ST**A** **P**IMF**SNK**MAR LGKG**YMFESK** SMKLR**TQIPA** **E**MLAS**IDLKY** FNDSTR**KKIE** **KIR**PL**LIDGT**  
**AS**LSPG**MMMG** **MF**NML**STVLG** **V**SILNL**GOKR** HTK**TTYW**D**G** **LQ**SSD**FALI** **V**NAP**NHEGTO** **AG**VNR**FYRTC** KLLG**INMSK****K**  
KSYINR**TGTE** **E**FTS**FFYR**YG FVANF**SMELP** SFGV**SGINES** ADMSIG**VTVI** **K**N**M**IN**N**DL**G** **PAT**AQ**MA**LQ**L** **F**IKD**YRYTYR**  
CHRGDTQ**IQ**T **R**S**FE**IK**KLW** **EQ**THS**KAGL****L** **V**SDGG**P**N**L**YN **I**RNL**HIPEVC** **L**KWEL**MD**ED**Y** **Q**GR**LC**N**LP****N** **F**VNHK**DIESV**  
**NN**AV**IMP**AG**H** **PA**K**N**MEY**DAV** **AT**THS**WIP**K**R** **N**RSIL**N**TS**QR** GILEDE**QMYQ** KCCNL**F**E**KFF** PSSSY**R****RPV**G **I**SS**M**VEAM**V****S**  
**R**ARIDAR**IDF** ESGR**IKKEEF** **TE**IM**K**IC**STI** EELRR**QK**

PA

MEDFVR**QCFN** **P**MIV**E**LA**EKA** MKEYGED**LKI** ETN**KFAA**ICT HLEVC**F**MYSD FHFID**EQGES** IVVELG**D**PN**A** LL**K**H**R**FET**IE**  
**G**DR**T**IA**WT** **I**NSIC**NTTGA** **E**K**P**K**FL**PD**LY** **DY**KNR**F**IE**T** **G**VT**R**EV**H**IT**Y** **Y**LE**K**ANK**IKS** **E**K**T**HI**H**IF**SF** **T**GE**M**AT**K****AD**  
YTLD**EE**SR**AR** IKTRL**FT**IR**Q** EMAS**R**GL**WDS** **F**RO**S**ER**GEET** **I**EE**R**FEIT**GT** MR**K**LAD**QSLP** **P**NF**S**SL**ENFR** **A**YV**D**GE**F**PN**G**  
**Y**IEG**L**SQ**MS** KEVNAR**IEPF** LKSTR**PLRL** PDGPP**C**SQ**RS** **K**FL**LMD**AL**K****L** **S**IED**P**SH**E**GE **G**I**P**LY**D**AT**K****C** MR**T**FFG**W**K**E**P  
**N**VV**K**PHE**KGT** **N**PNY**L**SW**KO** **V**LAE**LQ**DI**E**N **E**E**K**IP**R**TK**NM** KKT**S**QL**KWAL** GENMA**E**KVD FDC**KD**VGD**L** **K**QY**S**DE**PEL**  
**R**SLAS**WQNE** **F**N**K**AC**E**L**TDS** **S**WIEL**D**E**IGE** **D**AA**P**IE**H**IAS **M**RRNY**F**TA**EV** **S**HCR**A**TEY**IM** **K**GVY**I**N**TALL** **N**AS**C**AAM**D**DF  
**Q**LIP**M**ISK**CR** TKEGR**R****KTNL** **Y**G**F**II**K**GR**SH** LRND**T**D**VVNF** **V**SM**E**FS**L**TD**P** **R**L**E**PH**K**WE**KY** **C**V**L**EV**G**DM**LL** **R**SA**I**GH**V**SR**P**  
**M**FLY**V**RT**NGT** SKIKM**K**W**ME** MRR**C**LL**Q**SL**Q** **Q**IES**M**IE**AES** **S**V**K**E**K**DM**TK**E **F**FE**N**K**S**ET**WP** **V**G**S**PK**G**VE**E** GSIG**K**VC**R**TL  
LAKSVFN**LY** ASPQ**LE**GS**A** ESR**K**LL**L**L**TVQ** **A**LR**D**NLE**P**GT FDLG**L**YE**AI** EECL**I**ND**PW**V LLNAS**W**FN**SF** L**T**HAL**R**

HA

MKAFVLV**LLY** AFVATD**ADTI** CIGYHANN**ST** DTVDT**I**FE**K****N** **V**AV**TH**S**VN**LL **E**DR**HN**G**K**L**CK** **L**KGI**A**PL**Q**L**G** **K**CNITG**W**LL**G**  
**N**PE**C**DS**LL**PA **R**SW**S**YIV**ETP** **N**SENGAC**YPG** **D**FID**Y**EEL**RE** **Q**LSS**V**SS**L**ER **F**E**I**FP**K**ESS**W** **P**NH**T**FG**V**NG**T** **C**SHRG**K**SS**F**  
**Y**RN**LL**W**L**TK**K** GDSY**PK****L**T**NS** **Y**VNN**K**G**K**EV**L** **V**LWGV**H**HP**SS** **S**DEQ**S**LY**SN** **G**NAY**S**V**S**ASS **N**YN**R**FT**PEI** **A**AR**P**K**V**KD**QH**  
**G**RMNY**Y**W**TLL** EPGD**T**II**EFA** TGNLI**A**P**WYA** FALS**R**GF**ESG** IITS**N**AS**M**HE CNT**K****Q**TP**Q**G **S**IN**S**N**L**PF**Q**N **I**HP**V**TIG**E**CP  
**K**V**V**R**ST**KL**RM** VTGL**R****NP**SI **Q**Y**R**GL**F**G**A**TA **G**FIEGG**W**T**G**M **I**DG**W**Y**G**Y**H**HQ **N**EQSG**S**Y**A**AD **Q**K**S**TQ**N**A**I**NG **I**T**N**K**V**NS**V**IE  
K**M**N**T**Q**T**FA**VG** **K**E**F**N**L**E**K**RM **E**N**L**N**K**K**V**DD**G** **F**LDI**W**T**Y**NA**E** **L**VL**L**EN**ERT** **L**DF**H**DL**N**V**K**N **L**Y**E**K**V**K**S**Q**L**K **N**NA**K**E**I**GN**G**  
**F**E**F**Y**H**K**C**DN**E** **C**M**S**SV**R**NG**TY** DYP**K****Y**SE**E**SK **L**NR**E**KID**G**V**K** LESMG**V**Y**Q**IL AI**Y**ST**V**ASS**L** VLL**V**SL**G**AIS **F**WM**C**NS**G**SL**Q**  
CRICI

NP

MATKG**T****RSY** **Q**OM**E**TD**GERO** **N**ATEIR**ASVG** **K**MID**G**IG**R**FY **I**QM**C**TEL**KLS** **D**YEG**R**L**I**Q**NS** **L**TIER**M**VL**SA** **F**DER**R**N**K**YLE  
**E**HP**S**AG**K**DP**K** **K**TGG**P**TY**RRV** DGKW**R****RELI** **Y**DKE**E**IR**RIW** **R**Q**AN**NG**D**AT **A**GL**T**H**M**MI**WH** **S**N**L**NDAT**YQR** TRAL**V**RT**GMD**  
**P**RM**C**SL**M**Q**GS** **T**LP**R**RS**G**AG **A**AV**K**GV**G**TM**V** **M**ELIR**M**IK**R**G INDR**N**F**WRGE** NGR**R****T**RI**AYE** **R**MCN**L**K**G**K**E** **Q**TAA**Q**RT**MVD**  
**Q**VRES**R**NP**GN** **A**E**F**ED**L**IF**LA** **R**SAL**I**LR**GSV** **A**H**K**SL**P**AC**V** **Y**GS**A**VAS**G**YD **F**EREG**S**Y**LVG** **I**D**P**FR**LLQ**NS **Q**VY**S**LIR**P**NE  
**N**PA**H**KS**Q**LV**W** **M**ACH**S**A**F**ED **L**R**V**SS**F**IR**GT** **K**V**V**PR**G**KL**ST** **R**GV**Q**IAS**N**EN **M**ET**M**ES**S**TL**E** **L**RS**R**YWA**IRT** **R**SGG**N**T**N**Q**QR**  
**A**SS**G**QIS**IQP** **T**FS**Q**RN**LP**E **D**RPT**I**MA**AFT** **G**NTE**G**RT**S**DM **R**TE**I**IR**L**MES **A**R**P**ED**V**S**FQ**G **R**GV**F**EL**S**DE**K** **A**T**S**P**I**V**S**FD  
**M**NEGS**Y**FG **D**NA**E**EY**D**N

NA

MNP**N**Q**K**II**T**I GSIC**M**V**V**G**II** SLILQ**I**GN**II** SIWISH**S**IQ**T** GNQ**N**HT**G**IC**N** QGS**I**TY**K**V**V**A GQD**S**T**S**V**ILT** GN**S**SL**C**PI**R**G  
**W**ATH**S**K**D**NG**I** **R**IG**S**K**G**D**V**F **I**RE**P**F**S**CS**H** **L**EC**R**T**F**FL**TQ** **G**ALL**N**D**K**HS**R** GT**F**KDR**S**PY**R** **A**LM**S**CP**V**GE**A** **P**SPY**N**SR**F**ES  
**V**AWSAS**ACHD** **G**M**G**WL**T**IG**S** **G**PDD**G**AV**AVL** **K**YNG**I**IT**ETI** **K**SWR**K**NIL**R**T QES**E**CT**C**V**NG** SC**F**T**I**MT**D**GP SDGLAS**Y**K**I**F  
KIE**K**G**K**VT**KS** **I**EL**N**AP**N**SH**Y** **E**EC**S**C**Y**PD**TG** **K**VMC**V**CR**DNW** **H**GS**N**RP**W**SE **Q**DNLD**Y**K**IGY** **I**CS**G**V**F**GD**NP** **R**PKD**G**T**G**SG**C**  
**P**VSAD**G**ANG**V** **K**G**F**SY**K**Y**NG** **V**WIG**R**TK**S**D**S** **S**R**H**G**F**EMI**D** **P**NG**W**T**E**TD**SR** **F**SMR**Q**D**V**V**AM** **T**DRSG**S**Y**SG**SE **V**QH**P**ELT**G**LD  
**C**MR**P**CF**W**EL **I**RGL**P**EED**AI** WTS**G**SIIS**F**C GVN**G**DT**V**D**WS** WPD**G**AL**P**FT ID**K**

M1

**M**SL**L**TE**V**ET**Y** **V**LS**I**VP**S**GP**L** **K**AE**I**AQ**R**LED **V**FAG**K**NT**D**LE **V**LM**E**WL**K**TR**P** **I**LS**P**LT**K**G**IL** **G**FV**F**TL**T**VP**S** **E**RG**L**QRR**REF**  
**Q**NALNG**NDP** **N**MD**K**AV**K**LY RKL**K****R**E**I**TF**H** **G**AK**E**I**A**LS**YS** **A**GA**L**AS**C**M**GL** **T**YN**R**MG**AV**TT **E**VAF**G**LV**CAT** **C**EQ**I**AD**S**OH**R**  
SHR**Q**M**V**TT**TN** **P**LIR**H**EN**RMV** **L**AST**T**AK**A**ME **Q**MAG**S**SE**QAA** **E**AMD**I**AS**QAR** **Q**MV**Q**AM**RTIG** **T**HP**S**SS**AGLK** **D**DL**E**N**L**Q**AY**  
**Q**KRM**G**V**Q**MQ**R** FK

M2

**M**SL**L**TE**V**ET**P** **I**RNEW**G**CR**C**N DSSD**P**L**V**IA**A** NIIEIL**H**L**IL** WILD**R**L**F**FF**K** IYRR**F**KY**GLK** **R**GP**S**TE**G**V**PE** **S**M**R**E**E**Y**R****K**EO  
**Q**NAV**D**VDD**G**H **F**VN**I**E**L**E

NS1

MDPNT**V**SS**FQ** VDC**F**L**W**HVR**K** **R**VA**D**Q**E**L**GDA** **P**FLD**R**LRRD**Q** KSLR**G**R**G**ST**L** **G**LDI**E**TAT**RA** GKQ**I**VER**ILK** **E**ES**D**EAL**KMT**  
**M**AS**V**PAS**RYL** **T**DM**T**LE**EMS**R **H**WF**L**MP**K**Q**K** **V**AG**P**LC**I**RM**D** QA**I**MD**K**NI**L** **K**AN**F**SV**I**FD**R** **L**ET**L**IL**L**RA**F** **T**EEG**T**IV**GEI**  
**S**PL**P**SL**P**GH**T** **D**ED**V**K**NA**VG **L**IG**G**LE**W**NN**N** **T**VR**V**SE**T**L**OR** FAWR**S**SN**ENG** **R**P**L**TP**K**Q**K**R **K**MAG**T**IR**SEV**

NEP

MDPNT**V**SS**FQ** DIL**M**RS**K**MQ **L**GSS**S**ED**L**NG **I**IT**Q**FES**L**K**L** YR**D**SL**G**E**A**VM **R**MGD**L**H**S**L**Q**N **R**NG**K****W**RE**QLG** **Q**K**F**E**E**IR**L**W**I**  
EEV**R**HL**R**L**K****IT** **E**NS**F**EQ**I**TE**M** **Q**AL**Q**LL**L**EV**E** **Q**E**I**RT**S**F**Q**L I

PB2

MERIKELRNL MSQSRTREIL TKTTVDHMAI IKKYTSGRQE KNPALRMKWM MAMKYPITAD KRITEMIPER [NEQGQTLWSK](#)  
MNDAGSDRVM VSPILAVTWNN [RNGPITNTVH](#) [YPK](#) IYKTYFE RVERLKHGTE [GPVHERNQVK](#) [IRRRVDINPG](#) [HADLSAKEAQ](#)  
[DVIMEVVFNP](#) [EVGARILTSE](#) [SQLTITKEKK](#) EELQDCKISP [LMVAYMLERE](#) LVRKTRFLPV AGGTSSVYIE VLHLTQGTWC  
EQMYTPGGEV [RNDVDQSLT](#) [TAARNIVRR](#) [AVSADPLASL](#) [LEMCHSTOIG](#) [GIRMVDILRQ](#) [NPTEEQAVDI](#) [CKAAMGLRIS](#)  
[SSFSFGGFTF](#) [KRTSGSSVKR](#) [EEEVLGTGNLQ](#) [TLKIRVHEGY](#) EEFTMVGRRA TAILRKATRR [LIQILVSGRD](#) EQSIAEAIIV  
AMVFSQEDCM IKAVRGDLNF [VNR](#) ANQRLNP MHQLLRHFQK DAKVLFQNWG VEPIDNVGMG IGILPDMTPS IEMSMRGVRI  
SKMGVDEYSS TERVVVSIDR FLIRIRDQRGN [VLLSPEEVSE](#) [TOGTEK](#) LTIT YSSMMWEIN GPESVLVNTY QWIIRNWETV  
KIQWSQNPTM LYNKMEFEPE [QSLVPKAIRG](#) [QYSGFVRTLF](#) QQMRDVLGTF [DTAQIILLLP](#) [FAAAPPKQSR](#) [MQFSSTFVNV](#)  
[RGSQMRILVR](#) [GNSPVFVNYK](#) ATKRLTVLGK [DAGLTLEDPD](#) [EGTAGVESAV](#) [LRGFLILGKE](#) NKRYGPAISI [NELSNLAKGE](#)  
KANVLIGQGD VVLVMKRKRQ [SSILTDSQTA](#) [TKRIRMAIN](#)

PB1

MDVNPTLLFL KIPQAUAIST TFPYTGDPPY SHGTGTGYTM DTVNRTHQYS EKGKWTNTTE TGAPQLNPID GPLPEDNEPS  
GYAQTDVCLE AMAFLEESHG GIFENSCLCT MEVVQQTTRVD KLTQGRQTYD [WTLNRNQPA](#) [TALANTIEVF](#) [R](#) SNGLTANES  
GRILDFLKDV MESMNKEIE ITTHFQKRKR VRDNMTKKMV TQRTIGKKKQ RLNRKGYLIR ALTLNMTKD AERGLKRRRA  
IATPGMQIRG [FVYFVETLAR](#) SICEKLEQSG [LPVGGNEKKA](#) KLANVVRKMM TNSQDTEISF TITGDNTKWN ENQNPRLFLA  
[MITYITRNQ](#) [EWFNRILSMA](#) PIMFSNMAR LGKGYMFESK RMKIRTOIPA [EMLASIDLKY](#) [FNESTKKIE](#) KIRPLLIDGT  
ASLSPGMMG MFNMLSTVLG VSILNLGQKK YTKTIYWDG [LQSSDDFALT](#) [VNAPNHEGIG](#) [AGVDRFYRCT](#) KLVGINMSKK  
KSYINKTGTF [EFTSFFRYG](#) FVANFSMELP SFGVSGVNES ADMSIGVTVI KNNMINNDLG PATAMALQL FIKDYRYTYR  
CHRGDQIQT RRSFELKLW [DQTSQKVGLL](#) [VSDGGPNLYN](#) [IRNLHIPEVC](#) [LKWELMDDY](#) RGRLCNPLND [FVSHK](#) EIDSV  
NNAVVMPAHG PAKSMEDAV ATTHSWIPKR NRSILNTSQR GILEDEQMYQ KCCNLFEKFF [PSSSYRPPVG](#) ISSMVEAMVS  
RARIDARVDF ESGRIKKEEF SEIMKICSTI [EELRRQK](#)

PA

MEDFVRQCFN PMIVELAECT MKEYGEDLKI [ETNK](#) FAAICT HLEVCFMYSO FHFINEQGES IIVELGDPNA LLKHRETEIE  
[GRDRTMAWTV](#) VNSJCNTTGA EKPKFLPDLY [DYKENRFIEI](#) [GVTRREVHIY](#) [YLEK](#) ANKTKS EKTHIHIFSF TGEEMATKAD  
[YTLDEESRAR](#) IKTRLTFTIQ EMASRGLWDS [FROSERGEET](#) [IEERFEITGT](#) MRKLADQSLP [PNFSSLENFR](#) [AYVDGFEPNG](#)  
[YIEGKLSQMS](#) KEVNARIEPF LKTTPLRLPL PNGPPCSQRS KFLMLDALKU [SIEDPSHEGE](#) [GIPLYDAIKC](#) MRTFFGWKEP  
NVVVKPHEKGI [NPNYKLSWKQ](#) [VLAELQDIEN](#) [EGEIKP](#) TKNM KKTSQLKWAL GENMAPEKVD FDDCKDVGDL [KQYDSDEPEL](#)  
[RSLASWQNE](#) [FNK](#) ACCLTDS SWIELDEIGE DVAPIEHIAS MRRNYFTSEV SHCRATEYIM KGVYINTALL NASCAAMDDF  
QLIPMISKCR TKEGRRKTNL [YGFIIKGRSH](#) LRNDTDVVNE [VSMESLTDLP](#) [RLEPHKWEKY](#) [CVLEIGDMLT](#) [R](#) SAIGQVSRP  
MFLYVRTNGT SKIKMKWME MRRCLLQSLQ [QIESMIEAES](#) [SVK](#) EKDMTKE [FFENKSETWP](#) [IGESPK](#) GVVE SSIGKVCRTL  
LAKSVFNLSY [ASPOLEGFSA](#) [ESRKLILLI](#) [ALR](#) DNLEPGT FDLGGLYEAI EECLNDPPW LLNASWFNSF LTHALS

HA

MKAILVLLY TFATANADTL CIGYHANNST DTVDTVLEKN VTVTHSVNLL EDKHNGKLCK [LRGVAPLHLG](#) [K](#) CNIAGWILG  
NPECESLSTA SSWSYIVETP SSDNGTCYPG DFIDYEELRE [QLSSVSFFER](#) FEIFPKTSSW [PNHDSNKGVT](#) [AACPHAGAS](#)  
FYKNLILWLK [KGN](#) SYPKLSK [SYINDKGEV](#) [LVLWGIHHP](#) [TSADQQLYQ](#) [NADAYVFVGS](#) [SRYSKKFKPE](#) IAIRPKVRDQ  
EGRMNYWTL [VEPGDKITFE](#) [ATGNLVVPRY](#) [AFAMER](#) NAGS GIIISDTPVH DCNTTCQTPK GAINSLPFQ NIHPITIGKC  
PKYVKSTKLRLATGLRNIPS IQSRGLFGAI [AGFIEGGWTG](#) [MVDGWYGYHH](#) [QNEQSGSYAA](#) [DLKSTQNAID](#) [EITNKVNSVI](#)  
[EKMNTQFTAV](#) [GKEFNHLEKR](#) [TENLNKKVDD](#) [GFLDIWTYNA](#) [ELLVLENER](#) [TLDYHDSNVK](#) NLYEKVRSQ LKNAK [ETGNG](#)  
[CFEFYHKCDN](#) TCMESVKNGT [YDYPKYSEEA](#) KLNREEIDGV [KLESTR](#) IQI LAIYSTVASS LVLVSLGAI SFWMCSNGSL  
QCRICI

NP

MASQGTKRSY [EQMETDGERQ](#) [NATEIR](#) ASVG KMIGGIGRFY [IQMCTELKLS](#) [DYEGRLIQNS](#) [LTIERMVLSA](#) [FDERRNKYLE](#)  
[EHPGAGDKPK](#) [KTGGPIYRRV](#) NGKWMRELIL [YDK](#) EEIRRIW [RQANNGDDAT](#) [AGLTHMMIWH](#) [SNLNDATYQR](#) TRALVRTGMD  
PRMCSLMQGS [TLPRRSGAAG](#) [AAVKGVGTMV](#) [MELVR](#) MIKRG INDRNFWRGE NGRKTRIAYE RMCNILKKE [QTAQKAMMD](#)  
[QVRESRPNGN](#) [AEFEDLTFLA](#) [RSALILRGS](#) [AHKSCLPACV](#) [YGPVAVASGY](#) [FEREGYSLVG](#) [IDPFRLLOS](#) [QVYSLIRPNE](#)  
[NPAHKSQVLW](#) [MACHSAAFED](#) [LRVLSFIKGT](#) KVLPRGKLT RGVQIASNEN METMESSTLE [LR](#) [SRYWAIRT](#) [RSGGNTNQRR](#)  
[ASAGQISIQP](#) [TFSVQR](#) NLPF DRTTIMAAFN [GNTEGRTSDM](#) [RTEIIRMMES](#) [ARPEVVSFQG](#) [RGVFELSDEK](#) [AASPIVPSFD](#)  
[MSNEGSYFFG](#) [DNAEEYDN](#)

NA

MNPNQKIITI GSVCMTIGMA NLILQIGNII SIWISHSIQL GNQNIETCN QSVITYENNT WVNQTYVNIS NTNFAAGQSV  
VSVKLAGNSS LCPVSGWAIY SKDNSVRIGS [KGDVFVIREP](#) [FISCSPLECR](#) [TFFLTQGALL](#) [NDK](#) HSNGTIK DRSPYR [TLM](#)  
[CPIGEVPSPY](#) [NSRFESVAWS](#) [ASACHDGINW](#) [LTIGISGPDN](#) [GAVAVLKYNG](#) [IITDTIK](#) SWR NNILRTQSE CACVNGSCFT  
VMTDGPNSNGQ ASYKIFRIEK GKIVKSVEMN [APNYHYEECS](#) [CYPDSSEITC](#) [VCRDNWHGSN](#) [RPWVSFNQNL](#) [EYQIGYICSG](#)  
[IFGDNPRPND](#) [KTGSCGPVSS](#) NGANGVKGFS FKYGNGVWIG [RTKSISSRNG](#) [FEMIWDPNGW](#) [TGTDNNFSIK](#) [QDIYGINESW](#)  
[GYSGSFVQHP](#) [ELTGLDCIRP](#) [CFWVELIRGR](#) PKENTIWTSG [SSISFCGVNS](#) [DTVGWSWPDG](#) [AELPFTIDK](#)

M1

[MSLLTEVETY](#) [VLSIIPSGPL](#) [KAEIAQRLED](#) [VFAGKNTDLE](#) [VLMELWKTRP](#) [ILSPLTKGIL](#) [GFVFTLTVP](#) [ERGLQRRFV](#)  
[QNALNGNGDP](#) [NNMDK](#) AVKLY RKLKREITFH [GAKEISLSYS](#) [AGALASCMGL](#) [IYNRMGAVTI](#) [EVAFLGVCAT](#) [CEQIADSOHR](#)  
SHRQMVTTTN [PLIR](#) HENRMV [LASTTAKAME](#) [QMAGSSEQAA](#) [EAMEVASQAR](#) [QMVMAMRTIG](#) [THPSSSAGLK](#) [NDLLENLOAY](#)  
[QKRMGVQMQR](#) FK

M2

[MSLLTEVETP](#) [IR](#) NEWGCRCN GSSDPLTIAA NIIGILHLTL WILDRLFFKC IYRRFKYGLK [GGPSTEGVPK](#) [SMREEYRKEQ](#)  
[QSAVDADDGH](#) [FVSIELE](#)

NS1

MDPNTVSSSQ VDCFLWHVRK [RVADQELGDA](#) [PFLDR](#) LRRDQ KSLRGRGSTL GLDIKTATRA GKQIVERILK [EESDEALKMT](#)  
MASVPASRYL TDMTLEEMSR [DWSMLIPKQK](#) VAGPLCIRMD QAIMDKNIIL [KANFSVIFDR](#) [LETLLILLRAF](#) [TEEGATVGETI](#)  
[SPLPSLPGHT](#) [AEDVKNAVGV](#) [LIGGLEWNDN](#) [TVRVSETLQR](#) FAWRSSNENG [RPPLTPKQKR](#) EMAGTIRSEV

NEP

MDPNTVSSSQ DILLRMSKMQ LESSSEDNLG MITQFESLKL YRDSLGEAVM RMGDLHSLQN RNEKWR [EQLG](#) [QKFEIIRWLI](#)  
[EEVRHKLKIT](#) [ENSFEQITFM](#) [QALHLLLEVE](#) [QEIR](#) TFSQL I

# X-187

PB2

MERIKELRNL MSQSRTREIL TKTTVDHMAI IKKYTSGRQE KNPALRMKWM MAMKY**YPITAD** **KRITEMIPER** NEQGQTLWSK  
MNDAGSDRV**Y** **VSPLAYTWNN** **RNGPITNTVH** **YPK**IKYTYFE RVERLK**HGTF** **GPVHFR**NQVK IRR**RVDINPG** **HADLSAK**EAQ  
DVIMEVFPFN EVGAR**ILTSE** **SQLTITKEKK** EELQDCK**ISP** **LMVAYMLERE** LVRKTRFLPV AGGTSSVYIE VLHLTQGTWC  
EQMYTPGGVE R**NDVDQSLT** **TAARNIVRRA** **AVSADPLASL** **LEMCHSTQIG** **GIRM**VDILRQ NPTEEQAVDI CKAAMGLR**IS**  
**SSFSFGGTFE** **KRTSGSSSVKR** **EEVELTGNLQ** **TLK**IRVHEGY EEFMTVGRRRA TAILRKATRR **LIQLIVSGRD** EQSIAEAIIV  
AMVFSQEDCM IKAVR**GDLEF** **VNR**ANQRLNP MHQLLRHFQK DAKVLFQNWG VEPIDNVGMG IGILPDMTPS IEMSMRGVRI  
SKMGVDEYSS TER**VVYSIDR** FLRIRDQ**RGN** **VLLSPEEVSE** **TQGT**EKLTIT YSSMMWEIN GPESVLVNTY QWIIRNWETV  
KIQWSNQPTM LYNK**MEFEPE** **QSLVPK**AIRG **QYSGFVRTLE** **QOMRDVLGTF** **DTAQI**IKLLP **FAAAPK**QSR **MQSSSFTVNV**  
**R**GSGMRILVR GNSPVFNYNK ATK**RLTVLKG** **DAGTLTEDPD** **EGTAGVESAV** **LRGFLILGKE** NKR**YGPALSI** **NELSNLAK**GE  
KANVLIGQGQ VVLVMKRKRD SSILTDSQTA TKRIRMAIN

PB1

MDVNPTLLFL KVAQAIAIST TFPYTGDPPY SHGTGTGYTM DTVNRTHQYS EKGRWTTNTE TGAPQLNPID GPLPEDNEPS  
GYAQTDCLVE AMAFLEESHP GIFENSCIET MEVVQQTRVD KLTQGR**QTYD** **WTLNRNPAA** **TALANTIEVE** **R**SNGLTANES  
GRLIDFLKDV MESMNKEEMG ITTHFQRKRR VRDNMTKKMI TQRTMGKKKQ RLNRKSYLIR ALTNTMTKD AERGKLRRA  
IATPGMQIRG **FVYFVETLAR** SICEK**LEQSG** **LPVGNEKKA** KLANVVRKMM TNSQDTELSF TITGDNTKWN ENQNP**RFLA**  
**MITYMRNQP** **EWERNVLSIA** **PIMFSNKMAR** LGKGYMFESK SMKLR**TQIPA** **EMLASIDLKY** FNDSTKRIE KIRSLLEIGT  
ASLSPGMMMG MFNMLSTVLG VSILNLGQKR YTKTTYWMDG LQSSDDFALI VNAPNHEGIQ AGVDRFYRTC **KLLGINMSK**K  
KSYINR**TGTF** **EFTSFFRY**YG FVANFSMELP SFGVSGINES ADMSIGVTVI KNNMINNDLG PATAQMALQL FIKDYRYTYR  
CHRGDTQIQT RRSFEIKKLW EQTRSK**AGLL** **VSDGGPNLYN** **IRNLHIPEVC** **LKWELMDEDY** **QGRLCNPLNP** **FVSHK**EIESM  
NNAVMMPAHG PAKNMEYDAV ATTHSWIPKR NR**SILNTSQR** **GVLEDEQMYO** **RCCNLFEKEF** **PSSSYR**RPVG ISSMVEAMVS  
RARIDARIDF ESGRIKKEEF TEIMK**ICSTI** **EELRRQK**

PA

MEDFVR**QCFN** **PMIVELAEKT** MKEYGEDLKI ETNKFAAICT HLEVCFMYSF HFHINEQGES IIVELGDPNA LLK**HREFEIE**  
**GR**DRMTAWTV VNSICNTTGA EKPK**FLPDLY** **DYKENRFIET** **GVTR**REVHIY **YLEK**ANKIKS EKTHIHIFSF TGEEMATK**AD**  
**YTLDEESRAR** IKTRLFTIRQ EMASR**GLWDS** **FRQSERGEET** **TEERFEITGT** **MRKLADQSLP** PNFSSLENFR **AYVDGFEFNG**  
**YIEGK**LSQMS KEVNARIEFP LKTTPRPLRL PNGPPCSQRS **KFLLMDALKL** **SIEDPSHEGE** **GIPLYDAIKC** MRTFFGWW**KP**  
**NVYKPHEKGT** **NPNYLLSWKQ** **VLAELQDIEN** **EEKIPK**TKNM KKTSQLKWAL GENMAPEKVD FDDCKDVGDOL **KQYDSDEPEL**  
**RSLASWQNE** **FNK**ACELTDS SWIELDEIGE DVAPIEHAS MRRNYFTSEV SHCRATEYIM KGVYINTALL NASCAAMDDF  
QLIPMISKRC TKEGRRK**TNL** **YGFITK**GRSH LR**NDTDVVNF** **VSMEFSLTDP** **RLEPHKWEKY** **CVLEIGDMLT** **R**SAIGQVSRP  
MFLYVRTNGT SKIKMKWGMG MRRCLLQSLQ QIESMIEAES SVKEKDMTKE FFENK**SETWP** **TGESPK**GVEE SSIGKVCRTL  
LAK**SVFNLSY** **ASPOLLEGFSA** **ESRKLILLIVO** **ALR**DNLEPGT FDLGGLYEAI EECLINDPWV LLNASWFNSF LTHALS

HA

MKTIIALSYI LCLVFAQKLP GNDNSTATLC LGHHAVPNGT IVKTTINDQI EVTNATELVQ NSSTGEICDS PHQILDGKNC  
TLIDALLGDP QCDGFQNK**KW** **DLFVERSKEY** **SNCYPYDVPD** **YASLR**SLVAS SGTLEFNNES FNWGTQVQNG TSSACIR**RSK**  
**NSFFSR**LNWL TNLNFKYPAL NVTMPNNEQF DK**LYIWGVHH** **PVTDKQDIFL** **YAQASGRITV** **STKRSQQTVI** **PNIGSRPR**VR  
NIPSRISIWY TIVKPGDILL INSTGNLIAP RGYFKMQSGK SSIMR**SDAPI** **GKCNSECITP** NGSIPNDKPF QNVNR**ITYGA**  
**CPR**YVQNRTL KLATGMNRNP EKQTR**GIFGA** **IAGFTIENGWE** **GMVDGWYGF**R **HQNSEGRGQA** **ADLKSTQAAI** **DQINGKLNRL**  
IGK**TNEKFHQ** **IEKEFSEVEG** **RIQDLEKYVE** **DTKIDLWSYN** **AELLVALENO** **HTIDLTDS**EM **NKLFEK**TKKQ **RENAEDMG**N  
**GCFK**IYHK**CD** **NACIGSIRNG** **TYDHNVYRDE** **ALNNRFQIKG** VELKSGYKDW ILWISFAISC FLLCVALLGF IMWACQKGNI  
RCNICI

NP

MASQGT**KRSY** **EQMETDGERQ** **NATEIR**ASVG KMIGGIGRFY **IOMCTELKLS** **DYEGRLIQNS** **LTIERMVL**SA **FDERRNKYLE**  
**EHP**SAGKDPK **KTGGPIYRRV** NGKWMR**ELTL** **YDKEEIR**RW **ROANN**GGDAT **AGLTHMMIWH** **SNLNDATYQR** TRALVRTGMD  
PR**MC**SLMQGS **TLPRR**SGAAG **AAVGKGVGTMV** **MELVR**MIKRG INDRNFWRGE NGRKTRIAYE RMCNILK**GKGF** **QTAQA**KAMMD  
**QVR**ESRNP**GN** **AEFEDLTFLA** **RSALILRGSV** AHK**SCLPACV** **YGP**AVASGYD **FEREGYSLVG** **IDPFRLLQNS** **QVYSLIRPNE**  
**NPAHKSQ**LWV **MACHSAAFED** **LRVLSFIKGT** KVLPRGKLST RGVQIASNEN METMESSTLE LR**SRYWAI**RET RSGGNTNQQR  
**ASAGQISIQP** **TFSVQ**NLPF DR**TT**IMAAFN **GNT**EGRTSDM **RTEIRMMES** **ARPEDVSFOG** **RGVFELSDEK** **AASPIVPSFD**  
**MSNEGSYFFG** **DNAEEYDN**

NA

MNPNQKIITI GSVSLTISTI CFFMQIAILI TTVTLHFQKY EFNSPPNQV MLCEPTIIER NITEIVYLTN TTIEKEICPK  
LAEYRNWSKP QCDITGFAPF SKDNSIR**LSA** **GGDIWVTR**EP **YVSCDPDKCY** QFALGQGTTL NNVHSNNTVR DRTPYR**TLLM**  
**NELGVPFHLG** **TKQVCI**AWSS SSCHDGKAWL HVCITGGDKN ATASFIYNGR **LVDSVVSWSK** EILRTQSEEC VCIINGTCTVV  
MTDGSASGKA DTK**ILFIEEG** **KIVHTSTLSG** **SAQHVEECSC** **YPR**YPGVRCV CRDNWKG**NSNR** **PVIDINIKDH** **SIVSSYVCSG**  
**LVGDT**PRKND SSSSSHCLDP NNEEGGHGVK **GWAFDDGNDV** **WMGR**TISEKS **RLGYETFKVTI** **EGWSNPK**SKL QINRQVIVDR  
GNR**SGYSGIF** **SVEGK**SCINR **CFYVELIRGR** KEETEVLTWS NSIVVFCGTS GTYGTGSWPD GADINLMPI

M1

MSLLTEVETY VLSIIPSGPL **KAEIAQRLED** **VFAGKNTDLE** **VMEWLKTRP** **ILSPLTKGIL** **GFVFTLT**VPS **ERGLQR**RFV  
**QNALNGNDP** **NNMDK**AVKLY RKLK**REITFH** **GAKEISLSYS** **AGALASCMGL** **TYNRMGAVIT** **EVAFGLVCAT** **CEQIAD**SQHR  
SHRQ**MTVTTN** **PLIR**HENR**RV** **LASTTAKAME** **QMG**SSSEQAA **EAMEVASQAR** **QMVQAMRTIG** **THPSSSAGLK** **NDLLENQAY**  
**QKRMGVQMQR** FK

M2

MSLLTEVETP IRNEWGCRCN GSSDPLTIAA NIIGILHLTL WILDRLFFKC IYRRFKYGLK **GGPSTEGVPK** SMREEYRK**EQ**  
**QSAVDADDDH** **FVSIELE**

NS1

MDPNTVSSFQ VDCFLWHVRK **RVADQELGDA** **PFLDR**LRRDQ KSLRGR**GSTL** **GLDIK**TATRA GKQIVER**ILK** **EESDEALKMT**  
MASVPASRY**L** **TDMTLEMSR** **DWSMLIPKQK** **VAGPLCTIRMD** QAIMDKNIIL **KANF**SVIFDR **LETLLILLRAF** **TEEGATVGET**  
**SPLPSLPGHT** **AEDVKN**AVGV **LIGGLEWNDN** **TVRVSETLQR** FAWR**SSNENG** **RPPLTPKQKR** EMAGTIRSEV

NEP

MDPNTVSSFQ DILLRMSKMQ LESSSEDLNG MITQFESLKL YRDSLGEAVM RMGDLHSLQN RNEKWREQLG QKFEEIR**WLT**  
**EEVRHKLK****IT** **ENSFEQITFM** **QALHLLLEVE** **QEIR**TFSFQL I

# NIB-74xp (egg-grown)

PB2

MERIKELRNL MSQSRTREIL TKTTVDHMAI IKKYTSGRQE KNPALRMKWM MAMKYPTAD [KR](#)ITEMIPER NEQGQTLWSK  
MNDAGSDRVM VSPLAVTWNN RNPITNTVH YPKIYKTYFE RVERLKHGTF GPVHFRNQVK IRRVDINPG [HADLSAK](#)EAQ  
DVIMEVFFPN EVGAR[ILTSE](#) [SQLTITK](#)EKK EELQDCKISP LMVAYMLERE LVRKTRFLPV AGGTSSVYIE VLHLTGQTCW  
EQMYTPGGVE RNDVDDQSLT [IAARNIVRRA](#) [AVSADPLASI](#) [LEMCHSTQIG](#) [GIRMVDILRQ](#) NPTEEQAVDI CKAAMGLRIS  
[SSFSFGGTFE](#) [KRTSGSSVKR](#) [EEEVLTKNLQ](#) [TLK](#)IRVHEGY EEFMTVGRRR TAILRKATR [LQLIVSGRD](#) EQSIAEAIIV  
AMVFSQEDCM IKAVRGDINF [VNR](#)ANQLRNP MHQLLRHFQK DAKVLFQNWG VEPIDNVMG M IGILPDMTPS IEMSMRGVRI  
SKMGVDEYSS TERVVVSIDR FLRIRDQRGN [VLLSPEEVSE](#) [TOGTEK](#)LTIT YSSMMWEIN GPESVLVNTY QWIIRNWETV  
KIQWSQNPTM LYNKMEFEP QSLVPKAIRG QYSGFVRTLF QQMRDVLGTF [DTAQIIKLLP](#) [FAAAPPKQSR](#) [MQESSFTVNV](#)  
[RSGSGMRILVR](#) [GNSPVFNYNK](#) ATKRLTVLGK [DAGTLTEDPD](#) [EGTAGVESAV](#) [LRGFLILGKE](#) NKRYGALSI [NELSNLAKGE](#)  
KANVLIGQGD VVLVMKRRKD [SSILTDSQTA](#) [TK](#)RIRMAIN

PB1

MDVNPTLLFL KVPQAIAIST TFPYTGDPY SHGTGTGYTM DTVNRTHQYS EKGRWTTNTE TGAPQLNPID GPLPEDNEPS  
GYAQDTCVLE AMAFLEESHP GIFENSICIET MEVVQQTRVD KLTQGRQTYD [WTLNRNQPA](#) [TALANTIEVE](#) [R](#)SNGLTANES  
GRLIDFLKDV MESMKKEEMG ITHFQRKRR VRDNMTKKMI TQRTMGKKKQ RLNKRSLYLR ALTLTNTMTKD AERGLKRRRA  
IATPGMQIRG [FVYFVETLAR](#) SICEK[LEQSG](#) [LPVGGNEK](#)KA KLANVVRKMM TNSQDTELSF TITGDNTKW [ENQNPRMFLA](#)  
MITYMTRNQP EWFNRVLSIA PIMFSNMAR LGKGYMFESK SMKLR[TOIPA](#) [EMLASIDLKY](#) [FNDSTR](#)KKIE KIRSLLIETG  
ASLSPGMMMG MFNMLSTVLG VSILNLGQKR YTK[TTYWADG](#) [LQSSDDFALI](#) [VNAPNHEGIO](#) [AGVDR](#)FYRCT KLLGINMSKK  
KSYINR[TGTE](#) [EFTSFFYRG](#) FVANFSMELP SFGVSGINES ADMSIGVTVI KNNMINDLG PATAQMALQL FIKDYRYTYR  
CHRGDTQIQT RRSFEIKKLW EQTRSKAGLL [VSDGGPNLYN](#) [IR](#)NLHIPEVC LKWELMEDY QGRCLNPLNP FVSHKIESM  
NNAVMMPAHG PAKNMEYDAV ATTHSWIPKR NRSILNTSQR GVLEDEQMYQ RCCNLFKFF PSSSYRRPVG ISSMVEAMVS  
RARIDAR[JDF](#) [ESGR](#)IKKEEF TEIMK[ICSTI](#) [EELRRQK](#)

PA

MEDFVRQCFN PMIVELAET MKEYGEDLKI ETNKFAAICT HLEVCIFYSD FHFINEQGES IIVELGDPNA LLKHR[FEIIE](#)  
[GR](#)DRMTAWTV VNSICNTTGA EKPK[FLPDLY](#) [DYKENRFIET](#) [GVTRREVHIY](#) [YLEK](#)ANKIKS EKTHIHIFS TGEEMATKAD  
YTLDEESRAR IKTRLFTIRQ EMASRGLWDS [FRQSERGEET](#) [TEER](#)FEITGT MRKLADQSLP PNFSSLENFR AYVDGFEPNG  
YIEGKLSQMS KEVNARIEFP LKTTTPRPLRL [PNGPPCSQRS](#) KFLLMDALKL [SIEDPSHEGE](#) [GIPLYDAIK](#)C MRTFFGWKEP  
NVVKPHEKGI [NPNYLLSWKQ](#) [VLAELQDIEN](#) [EEK](#)IPKTKNM KKTSQLKWL GENMAPEKVD FDDCKDVGDL KQYDSDEPEL  
[RSLASWQNE](#) [FNK](#)ACELTDS SWIELDEIGE DVAPIEHAS MRRNYFTSEV SHCRATEYIM KGVYINTALL NASCAAMDDF  
QLIPMISKCR TKEGRRKTNL YGFIKGRSH LRNDTDVVNF [VSMFSLTDP](#) [RLEPHKWEKY](#) [CVLEIGDMLT](#) [R](#)SAIGQVSRP  
MFLYVRTNGT SKIKMKWME MRRCLLSQLO [QIESMIEAES](#) [SVK](#)EKDMTKE FFENK[SETWP](#) [IGESPKGVEE](#) [SSIGK](#)VCRTL  
LAKSVFNSLY [ASPQLEGFSA](#) [ESRKLLLIQV](#) [ALR](#)DNLEPGT FDLGGLYEAI EECLINDPWV LLNASWFNSF LTHALS

HA

MKAILVLLH TFATANADTL CIGYHANNST DTVDTVLEKN VTVTHSVNLL EDKHNGKLCK [LRGVAPLHLG](#) [K](#)CNIAGWILG  
NPECESLSTA SWSYIVETS SSDNGTCYPG NFIDYEELRE [QLSSVSFFER](#) FEIFPK[TSSW](#) [PDHDSNKGVT](#) [AACPHAGAKS](#)  
FYK[NLIWLVK](#) [KGN](#)SYPTLSK SYINDKGEV [LVLWGIHHP](#)S [TSADQQSLYQ](#) [NADAYVFVGT](#) [SRYSK](#)KFKPE [IAIRPK](#)VRNQ  
EGRMNYWTLL [VEPGDKITFE](#) [ATGNLVAPRY](#) [AFAMER](#)NAGS GIIISDTPVH DCNTTCQTPK GAINSLPFQ NIHPITIGKC  
PKYVNSTKLRL LATGLRNVPS IQSRGLFGAI AGFIEGGWTG MVDGWYGYHH QNEQSGSYAA DLK[STQNAID](#) [KITHKVN](#)SVT  
[EKMNTQTA](#)VF [KKEFNHLEKR](#) [IENLNKKVDD](#) [GFLDIWTYNA](#) [ELLVLLENER](#) [TLDYHDSNVK](#) NLYEKVRSQ LKNAK[ETGNG](#)  
[CFEFYHKCDN](#) [TCMESVKNGT](#) [YDYPK](#)YSEEA [KLNREEIDGV](#) [KLESTR](#)IYQI LAIYSTVASS LVLVSLGAI SFWMCSNGSL  
QCRICI

NP

MASQGTKRSY [EQMETDGERO](#) [NATEIR](#)ASVG KMIGGIGRFY [IQMCTELKLS](#) [DYEGR](#)LIONS [LTIERMVLSA](#) [FDERR](#)NKYLE  
[EHPSAGDKP](#)K [KTGGPIYR](#)RV NGKWMRELIL [YDK](#)EEIRRIW [RQANNGDDAT](#) [AGLTHMMIWH](#) [SNLN](#)DATYQR TRALVRTGMD  
PRMCSLMQGS [TLPRR](#)SGAAG [AAVKGVGTMV](#) [MELVR](#)MIKRG INDRNFWRGE NGRKTRIAYE RMCNILK[GKE](#) [QTAAQKAMMD](#)  
[QVRESRNP](#)GN [AEFEDLTFLA](#) [RSALILRGSV](#) [AHKSCLPACV](#) [YGP](#)AVASGYD [FEREGYSLVG](#) [IDPFLRLQNS](#) [QVYS](#)LIRPNE  
[NPAHKSQVLW](#) [MACHSAA](#)FED [LRVL](#)SFIKT KVLPRGKLST RGVQIASNEN METMESSTLE LRSRYWAIRT RSGGNTNQQR  
[ASAGQISTOP](#) [TFSVQR](#)NLPF DR[TTIMAAFN](#) [GNTEGR](#)TSDM RTEIIRMMS [ARPE](#)DVSFQG [RGVFELSDEK](#) [AASPIVPSFD](#)  
[MSNEGSVFFG](#) [DNAEEYDN](#)

NA

MNPNQKIITI GSVICITIGMA NLILQIGNII SIWISHSIQL GNQNIETCN QSVITYENNT WVNQTYVNIS NTNFAAGQSV  
VSVKLAGNSS LCPVSGWAIY SKDNSIRIGS KGDVFIREFP [FISCSPLECR](#) [TFFLTQ](#)GALL [NOK](#)HSNGTIK DRSPYR[TLMS](#)  
[CPIGE](#)VPSPY [NSRFES](#)VAWS [ASACHDGISW](#) [LTIGISGPDN](#) [GAVAVLK](#)YNG [IITDTIK](#)SWR NNILRTQESE CACVNGSCGT  
VMTDGPSSDGQ ASYKIFRIEK GKIVK[SVEMN](#) [APNYHYECS](#) [CYPDSSEITC](#) [VCRDNWHGSN](#) [RPWVSFNQNL](#) [EYQIGYICSF](#)  
[IFGDNPRPND](#) [KTGSCGPVSS](#) [NGANGVKGFS](#) [FKYGN](#)GVWIG [RTKSIS](#)SRNG [FEI](#)WDPNGW [TGTDN](#)NFSIK [QDI](#)VGINEWS  
[GYSGSFVQHP](#) [ELTG](#)LDCIRP [CFWEL](#)IRGR PKENTIWTSG SSISFCGVNS DTVGWSWPDG AELPFTIDK

M1

M[SLLTE](#)VEVY [VLSIIPS](#)GPL [KAEIAQR](#)LED [VFAGK](#)NTDLE [VLMEWL](#)KTRP [ILSPLTK](#)GIL [GFVFL](#)TVPS [ERGLQR](#)RFV  
[QNALNGNDP](#) [NNMDK](#)AVKLY RKLK[REITF](#) [GAKEIS](#)LSYS [AGALASCMGL](#) [IYNRM](#)GAVTI [EVA](#)GLVCAT [CEQIAD](#)SQHR  
[SHRQMVTTTN](#) [PLIRHEN](#)RV [LASIT](#)KAME [QMGAS](#)SEQAA [EAME](#)VASQAR [QMVQAM](#)RITG [THPSS](#)AGLK [NOLLEN](#)QAY  
[QKRMGVQMR](#) FK

M2

M[SLLTE](#)VEVY [IR](#)NEWGRCRN GSSDPLTIAA NIIGILHLTL WILDRLFFKC IYRRFKYGLK [GGPSTEG](#)VPK [SMREEYR](#)KEQ  
[QSAVDADDGH](#) [FVSIE](#)LE

NS1

MDPNTVSSFF VDCFLWHVRK [RVADQELGDA](#) [PFLDR](#)LRRDQ KSLRGRGSTL GLDIKTATRA GKQIVER[ILK](#) [EESDEAL](#)KMT  
MASVPASRYL TDMTLEMSR [DWSMLIP](#)KQK [VAGPLC](#)IRMD QAIMDKNIIL [KANFS](#)VIFDR [LET](#)LILLRAF [TEEGAT](#)VEI  
[SPLPSLPGHT](#) [AEDV](#)NAVGV [LIGGLE](#)WNDN [TVRV](#)SETLQR FAWR[SSNENG](#) [RPPLTPK](#)QKR EMAGTIRSEV

NEP

MDPNTVSSFF DILLRMSKMQ LESSSEDLNG MITQFESLKL YRDSLGEAVM RMGDLHSLQN RNEKWREQLG QKFEEIR[WLI](#)  
[EEVR](#)HKLKIT ENSFEQITFM QALHLLLEVE QEIRTSFSQL I

# NIB-74xp (MDCK-grown)

PB2

MERIKELRNL [MSQSR](#)TREIL TK[TTVDHMAI](#) [IKK](#)YTSGRQE KNPALRMKWM MAMKY**PITAD** [KRITEMIPER](#) [NEQGOTLWSK](#)  
MMDAGSDRVN [VSP](#)LA**VTWN** [RNGP](#)ITNTVH [YPK](#)IYKTYFE RVER**LKHGTF** [GPVHFR](#)NQVK [IRRRVD](#)IN**PG** [HADLSAK](#)EAQ  
DVIMEVWFVN EVGAR**ILTSE** [SOLTIT](#)KEKK EELQDCK**ISP** [LMVAYMLERE](#) LVRKTRFLPV AGGTSSVYIE VLHLTQGTCTW  
EQMYTPGGEV [RNDVDQSLT](#) [TAAR](#)NIVRR**A** [AVSADPLASL](#) [LEMCHSTQIG](#) [GIRMVD](#)ILRQ NPTEEQAVDI CKAAMGLR**IS**  
[SSFSFGGTFE](#) [KRTSGSSVKR](#) [EEEVL](#)TGNLQ [TLK](#)IRVHEGY EEFMTVGRRR TAILRKATRR LIQLIVSGRD EQSIAEAIIIV  
AMVFSQEDCM IKAVR**GD**LNE [VNRANQR](#)LNP [MHQLLR](#)HFQK DAKVLFQNWG VEPIDNVMG M IGILPDMTPS IEMSMRGVRI  
SK**MGVD**EYSS [TERVVVSIDR](#) FLRIRDQR**GN** [VLLSPEEVSE](#) [TQGT](#)EKLITIT YSSSMWWEIN GPESVLVNTY QWIIIRNWETV  
KIQWSQNPTM LYNK**MEFEPE** [QSLVPK](#)AIRG QYSGFVRT**LE** [QOMRDVLGTF](#) [DTAQIIKLLP](#) [FAAAPPK](#)QSR [MQFSSTFVNV](#)  
[R](#)GSGMRILVR [GNSPVFN](#)YNK ATKRLTVLGK [DAGLTEDPD](#) [EGTAGVESAV](#) [LRGFLILGKE](#) NKRY**YG**PALSI [NELSNLAK](#)GE  
[KANVLIGQGD](#) [VVLVMK](#)RKR**D** [SSIL](#)TD**SQTA** [TKR](#)IRMAIN

PB1

MDVNP**TL**LFL [K](#)VPAQNA**IST** [TFPY](#)TG**DP**PY [SHGTGTGYTM](#) [DTVNR](#)THQYS EKGRWTTNTE TGAQQLNPID GPLPEDNEPS  
GYAQTDCVLE AMAFLEESHP GIFENSCIET MEVVQQTRVD KLTQGR**QTYD** [WTLNRNQPA](#)**A** [TALANTIEVF](#) [RSNGLTANES](#)  
[GR](#)LIDFLKDV MESMNKEEMG ITTHFQRKRR VRDNMTKKMI TQRTMGKKKQ RLNKRSYLIR [ALT](#)LN**MTKD** AERGLKRR**A**  
[IATPGMQIRG](#) [FVYFVETLAR](#) SICEKLEQSG LPVGGNEKKA KLANVVRKMM TNSQDTELSF TITDONT**KWN** [ENQNPRMFLA](#)  
[MITYMTRNQD](#) [EWFNRNLSIA](#) [PIMFSN](#)KMAR LGKGYMFESK SMKLR**TQIPA** [EMLASIDLKY](#) [FNDSTR](#)KKIE KIRSLLEGT  
ASLSPGMMMG MFNMLSTVLG VSILNLGQKR YTKTTYWMDG LQSSDDFALI VNAPNHEGIQ AGVDRFYRTC KLLGINMSKK  
KSYINR**TGTF** [EFTSFFYRYG](#) FVANFSMELP SFGVSGINES ADMSIGVTVI [KNMNIN](#)DLG [PATAQMALQ](#) [FIK](#)DYRYTYR  
CHRGDTQIQT RRSFEIKKLW EQTR**S**KAGLL [VSDGGPNLYN](#) [IRNLHI](#)PEVC LK**WELM**DE**DY** [QGR](#)LCNPLNP FVSHKEIEM  
NNAVMMPAHG PAKNMEYDAV ATTHSWIPKR NR**SILNT**SQR [GVLEDEQMYQ](#) [RCN](#)NLF**EF**FF PSSSYR**RPVG** [ISSMVEAMVS](#)  
[R](#)ARIDAR**IDF** [ESGR](#)IKKEEF [TEIMKICSTI](#) [EELRR](#)QK

PA

MEDFVR**QCFN** [PMI](#)VELA**EKT** [MKEYGEDLKI](#) [ETNK](#)FAAICT HLEVCFMYS D FHFINEQGES IIVELGDPNA LLK**HRFEIIE**  
[GRDR](#)TMA**WT**V [VNSICNTGA](#) [EKPKFLPDLY](#) [DYKENRFIEI](#) [GVTRREVHIY](#) [YLEK](#)ANKIKS EK**THIH**IF**SF** [TGEEMATKAD](#)  
[YTLDEESRAR](#) IKTRLFTIRQ EMASR**GLWDS** [FRQSERGEET](#) [IEERFEITGT](#) [MRKLADQSLP](#) [PNFSSLENFR](#) [AYVDGFEPNG](#)  
[YIEGK](#)LSQMS KEVNARIEFP LKTTPRPLRL PNGPPCSQRS [KFL](#)MD**ALK** [SIEDPSHEGE](#) [GIPL](#)YDAIKC MRTFFGWKEP  
NVVKPHEK**GI** [NPNYLLSWQ](#) [VLAELQDIE](#)N [EEKIPK](#)TKNM KKTSQLKWAL GENMAPEKVD FDDCKDVGLD [KQYDSDEPEL](#)  
[RSLASWIQNE](#) [FNK](#)ACELTDS SWIELEIGE DVAPIEHAS MRRNYFTSEV SHCRATEYIM KGVIYNTALL NASCAAMDDF  
QLIPMISKCR TKEGRRK**TNL** [YGFIIK](#)GRSH [LRNDTDV](#)VNF [VSMEFSLTDP](#) [RLEPHKWEKY](#) [CVLEIGDMLI](#) [RSAIGQVSRP](#)  
[MFLYVRTNGT SKIKMKWME MRR\*\*CLLOSLO\*\* \[QIESMIEAES\]\(#\) \[SVK\]\(#\)EKDMTKE FFENK\*\*SETWP\*\* \[IGESP\]\(#\)KGV\*\*EE\*\* \[SSIGK\]\(#\)VCRTL  
LAKSVFNLSY ASPQLEGFSA ESRKLLLIQV ALRDNLEPGT FDLGGLYEAI EECLINDPWV LLNASWFNSF LTHALS](#)

HA

MKAILVLLH TFATANADTL CIGYHANNST DTDVTVLEKN VTVTHSVNLL EDKHNGKLCK [LRGVAPLHLG](#) [K](#)CNIAGWILG  
NPECESLSTA SSWSYIVETS SSDNGTCYPG NFIDYEEL**RE** [QLSSVS](#)SFER [FEIFPKTSSW](#) [PHD](#)SNKG**VT** [AACPHAGAKS](#)  
FYK**NLI**WL**VK** [KGN](#)SYPTLSK SYINDK**GKEV** [LVLWGTHHPS](#) [TSADQQS](#)LYQ [NADAYVFVGT](#) [SRYSK](#)FK**PE** [IAIRPK](#)VRNQ  
EGR**MNYYWT**L [VEPGDKITFE](#) [ATGNL](#)VAPRY [AFAMER](#)NAGS GIIISDTPVH DCNTTCQTPK [GAIN](#)TS**LPFO** [NIHPITIGK](#)C  
PKYVKSTKLR LATGLR**NVPS** [IQSRGLFGAI](#) [AGFIEGGWTG](#) [MVDGWYGYHH](#) [QNEQGS](#)GYAA [DLKSTQNAID](#) [KITNKVNSVI](#)  
[EKMNTQTAV](#) [GKEFNHLEKR](#) [IENLNK](#)KVDD [GFLDIWTYNA \[ELLVLENER\]\(#\) \[TLDYHDSNVK \\[NLYE\\]\\(#\\)KVRSQL KNNAK\\*\\*ETGNG\\*\\*  
\\[CFEFYHKCDN\\]\\(#\\) \\[TCMESV\\]\\(#\\)KNGT \\[YDYPKYSEEA K\\\*\\\*LNREE\\\*\\\*IDGV \\\[KLESTR\\\]\\\(#\\\)IYQI LAIYSTVASS LVLVVS LGAI SFWMCNSGSL  
QCRICI\\]\\(#\\)\]\(#\)](#)

NP

MASQGTK**RSY** [EQMETDGERO](#) [NATEIR](#)ASVG [KMIGGIGREFY](#) [IQMCTELKLS](#) [DYEGR](#)LIONS [LTIERM](#)VL**SA** [FDERRN](#)KYLE  
[EHPSAGDKPK](#) [KTGGPIYRRV](#) NGKWMR**ELLIL** [YDK](#)EEZRIW [RQANNGDDAT](#) [AGLTHMMIWH](#) [SNLN](#)DATY**QR** TRALVRTGMD  
PR**MCS**L**MOGS** [TLPRR](#)S**GAG** [AAVKGVGTMV \[MELVRMIKRG \\[INDRNF\\]\\(#\\)WRGE \\[NGR\\]\\(#\\)KTRIAYE RMCNILK\\*\\*GKE\\*\\* \\[QTA\\]\\(#\\)AKAMMD  
\\[QVRESR\\]\\(#\\)NP\\*\\*GN\\*\\* \\[AEFEDL\\\*\\\*TFLA\\\*\\\* \\\[RSALIL\\\]\\\(#\\\)RGSV \\\[AHKSCL\\\]\\\(#\\\)PACV \\\[YGP\\\]\\\(#\\\)AVASGYD \\\[FEREGY\\\]\\\(#\\\)SLVG \\\[IDPFRL\\\]\\\(#\\\)LQNS \\\[QVYS\\\]\\\(#\\\)LIRPNE  
\\\[NPAHKS\\\]\\\(#\\\)QL\\\*\\\*W\\\*\\\* \\\[MACHS\\\]\\\(#\\\)AA\\\*\\\*FD\\\*\\\* \\\[LRVLSFIKGT KVLPRGKLST \\\\[RGVQIASNEN \\\\\[METMES\\\\\]\\\\\(#\\\\\)STLE \\\\\[LRSRY\\\\\]\\\\\(#\\\\\)WAIRT RSGGNTNQQR  
\\\\\[ASAGQISIQP\\\\\]\\\\\(#\\\\\) \\\\\[TFSVQR\\\\\]\\\\\(#\\\\\)NLPF DR\\\\\*\\\\\*TTIM\\\\\*\\\\\*AAFN \\\\\[GNTEGR\\\\\]\\\\\(#\\\\\)TS\\\\\*\\\\\*DM\\\\\*\\\\\* \\\\\[RTEIIR\\\\\]\\\\\(#\\\\\)MES \\\\\[ARPEDVS\\\\\\*\\\\\\*FQ\\\\\\*\\\\\\*G \\\\\\[RGVFELSDEK \\\\\\\[AASPIVPS\\\\\\\\*\\\\\\\\*FD\\\\\\\\*\\\\\\\\*  
\\\\\\\\[MSNEGSYFFG \\\\\\\\\[DNAEEYDN\\\\\\\\\]\\\\\\\\\(#\\\\\\\\\)\\\\\\\\]\\\\\\\\(#\\\\\\\\)\\\\\\\]\\\\\\\(#\\\\\\\)\\\\\\]\\\\\\(#\\\\\\)\\\\\]\\\\\(#\\\\\)\\\\]\\\\(#\\\\)\\\]\\\(#\\\)\\]\\(#\\)\]\(#\)](#)

NA

MNPNQKIITI GSVCTIGMA NLILQIGNII SIWISHSIQL GNQNIETCN QSVITYENNT WVNQTYVNIS NTNFAAGQSV  
VSVKLAGNSS LCPVSGWAIY SKDNSIR**IGS** [KGDV](#)FVIREP [FISCS](#)PLECR [TFFLTQ](#)GALL [NOK](#)HSNGTIK DRSPYR**TLMS**  
[CPIGEVPSPY](#) [NSRFES](#)VAWS ASACHDGISW LTIGISGPDN GAVAVLK**YNG** [IITDTIK](#)SWR NNILRTQESE CACVNGSCFT  
VMTDGPSDGQ ASYKIFRIEK GKIVK**SVEMN** [APNYHYE](#)ECS [CYPDS](#)SEITC [VCRDN](#)WHGSN [RPWVS](#)FNQNL [EYQIGY](#)CSG  
[IFGDN](#)PR**PND** [KTGSCGP](#)VSS [NGANGV](#)KGFS FKYGNGVWIG [RTKSISS](#)RNG [FEI](#)WD**PNGW** [TGTDNN](#)FSIK [QDIVG](#)INEWS  
[GYSGSFVQHP \[ELTGLD\\*\\*CIRP\\*\\* \\[CFWELI\\]\\(#\\)RGR PKENTIWTSG SSISFCGVNS DTVGWSWPDG AELPFTIDK\]\(#\)](#)

M1

[MSLLTE](#)VETY [VLSIIPS](#)GPL [KAEIAQRLED \[VFAGKNTDLE \\[VLMEWL\\]\\(#\\)KTRP \\[ILSPL\\]\\(#\\)TKGIL \\[GFVFTL\\]\\(#\\)TVPS \\[ERGLQRR\\]\\(#\\)RFV  
\\[QNALNG\\]\\(#\\)NDP \\[NMMDK\\]\\(#\\)VKLYL RKLK\\*\\*REITFH\\*\\* \\[GAKEIS\\]\\(#\\)LSYS \\[AGALASCMGL \\\[TYNRM\\\]\\\(#\\\)GAVTT \\\[EVAFLGV\\\\*\\\\*CAT\\\\*\\\\* \\\\[CEQIADSOHR  
SHRQ\\\\\*\\\\\*MTTTN\\\\\*\\\\\* \\\\\[PLIR\\\\\]\\\\\(#\\\\\)HENRMV \\\\\[LASTTAKAME \\\\\\[QMGASSEQAA \\\\\\\[EAMEVASQAR \\\\\\\\[QMVQAMRTIG \\\\\\\\\[THPSSSAGLK \\\\\\\\\\[NDLLEN\\\\\\\\\\]\\\\\\\\\\(#\\\\\\\\\\)QOAY  
\\\\\\\\\\[QKRMGVQMQR FK\\\\\\\\\\]\\\\\\\\\\(#\\\\\\\\\\)\\\\\\\\\]\\\\\\\\\(#\\\\\\\\\)\\\\\\\\]\\\\\\\\(#\\\\\\\\)\\\\\\\]\\\\\\\(#\\\\\\\)\\\\\\]\\\\\\(#\\\\\\)\\\\\]\\\\\(#\\\\\)\\\\]\\\\(#\\\\)\\\]\\\(#\\\)\\]\\(#\\)\]\(#\)](#)

M2

MSLLTEVETP IRNEWGCRCN GSSDPLTIAA NIIGILHLTL WILDRLFFKC IYRRFKYGLK [GGPSTEG](#)V**PK** SMREEYRK**EQ**  
[QSAVDADDGH \[FVSIELE\]\(#\)](#)

NS1

MDPNTVSSFQ VDCFLWHVRK [RVADQELGDA \[PFLDR\]\(#\)LRRDQ KSLRGRGSTL GLDIKTATRA GKQIVER\*\*ILK\*\* \[EESDEALKMT  
\\[MASVPASRYL\\]\\(#\\) \\[TDMTLE\\]\\(#\\)MSR \\[DWSMLI\\]\\(#\\)PKQK \\[VAGPLC\\]\\(#\\)IRMD \\[QAIMDK\\]\\(#\\)NIIL KANFSV\\*\\*IFDR\\*\\* \\[LET\\]\\(#\\)L\\*\\*ILLRA\\*\\*F \\[TEEGAIVGEI  
\\\[SPLPS\\\]\\\(#\\\)LP\\\*\\\*GHT\\\*\\\* \\\[AEDVK\\\]\\\(#\\\)NAVGV LIGGLEWNDN TVR\\\*\\\*YSET\\\*\\\*LQR FAWR\\\*\\\*SSN\\\*\\\*ENG \\\[RPPLTPK\\\]\\\(#\\\)QKR EMAGTIRSEV\\]\\(#\\)\]\(#\)](#)

NEP

MDPNTVSSFQ DILLRMSKMQ LESSSEDNLG MITQFESLKL YR**DSLGE**AVM [RMGDLH](#)SLQN [RNEK](#)WREQLG QKFEEIR**WLI**  
[EEVRHLK\*\*IT\*\* \[ENSFEQ\]\(#\)IT\*\*FM\*\* \[QALHLLLEVE \\[QEIR\\]\\(#\\)TF\\*\\*SFQ\\*\\*L I\]\(#\)](#)

# B/Brisbane/60/2008

PB2

MTLAKIELLK QLLRDNEAKT VLKQTIVDQY NIIRKFNTSR IEKNPSLRMK WAMCSNFPLA LTKGDMANRI PLEYKGIQLK  
TNAEDIGTKG QMCSIAAVTW WNTYGPIGDT EGFERVYSEF FLRKMRLDNA TWGRITTEGPV ERVRKRVLLN PLTKEMPPDE  
ASNVIMEILF PEAGIPRES TWIHRERLIKE KREKLKGTMI TPVILAYMLE RELVARRRFL PVAGATSAPF IEMHLCLGGE  
NMRQIYHPGG NKLTESRSQS MIVACRKIIR RSIVASNPLE LAVETANKTV IDTEPLKSCSL AATDGGDVAC DTIRAAALGLK  
IRQRQRFGRL ELKRISGRGF KNDDEETLIGN GTIQIKIGIW GEEEFHVRG ECRGILKSK MKLEKLLINS AKKEDMRDLI  
ILCMVFSDQT RMFGVGRGET NFNLAGQLL SPHYQLQR YF LNRNDOLFDO WGYEESPAS ELHGINESMT ASDYTLKGIV  
VTRNVIDDPS STETEKVDSIT KNLSLIRKTG EVIMGANDVS ELESQAOLMI TYDTPKMWM GTTKELVONT YQWLKFNLV  
LKAQFLLGKE DMFQWDAFEA FESIIPQKMA GOYSGFARAV LKQMRDQEVMT KTDQFIKLLP FCFSPPKLRG NGEPYQFLKL  
VLKGGGENFI EVRKGSPLFS YNPQTEVLTI CGRMMSLKGK IEDEERNRSM GNAVLAGFLV SGKYDPDLGD FKTIEELEKL

PB1

MNINPYFLFI DVPVQAAIST TFPYTGVPY SHGTGTGYTI DTVIRTHEYS NKGKQYISDV TGCTMVDPTN GPLPEDNEPS  
AYAQLDCVLE ALDRMDEEHP GLFOAASQNA MEALMVITVD KLTOGRQTFD WTVCRNPAA TALNTITISE RLNDLNGADK  
GGLIPEQDQI IDSLDRPEMT FFSVKNKKK LPAKNKKGFL IKRIPMKVKD KITKVEYIKR ALSLNTMTIK AERGKLRRA  
IATAGIQIRG FVLVVENLAF NICENLEQSG LPVGGNEKKA KLSNAVAKML SNCPPGGISM TVTGDNKTWN ECLNPRIFLA  
MTERITRSDP IWFRDFCSTA PVLFSEN IAR LGKGFMTISK TKRLKAQIPC PDLFSIPLER YNEETRAKLK KLPKPFNEEG  
TASLSPGMMI GMFNMSTVL GVAALGIKNI GNKEYLWDGL QSSDDFALFV NAKDEETCME GINDFYRTCK LLGVNMSKKK  
SYCNETGMFE FTSMFYRDGF VSNFAMELPS FGVAGVNES A DMAIGMTIIK NNMINNMGMP ATAQTATQLE TADYRYTYKC  
HRGDSKVEG RMKTIKELVE NTKGRDGLLV ADGGPNINYI RNLHIPEIVL KYNLMDPEYK GRLLHPQNPV VGHLSIEGTX  
EADITPAHPG VKKMDYDAVS GTHSWRTKRN RSLINTDORN MILEEQCYAK CCNLEACFN SASYRKPVGO HSMLEAMHR

PA

MDTFITRNFQ TTIQAKNT MAEFSDEPEL QPAMLFNICV HLEVYVISD MNFLDEEGKA YTALEGQGKE QNLRPQYEVI  
EGMPRTIAM VQSLAQEHG IETPKYLADI FDYKTRFIE VGITKGLADD YFWKKKEKLG NSMELMIFSY NQDYSLSNES  
SLDEEGKGRV LSRLELQAE LSLKNLQVLE TGEEDVEKGI DFKLGQITSR LRDISVPAGF SNFEGMRSYI DNMDPKGAIE  
RNLARMSPLY SVTPKRLTWE DLRPIGHIY DHLEPEVPYN AFLMSDELG LANMTEGSKK KPKTLAKECL KPYSTLRDQT  
DPTLIMKSEK ANENFELKLTW RDCVNTISNE ETSNELQKTN YAKWATGDGL TYQIMKEVA IODETMCQEE PKIPNKRVA  
AWQTEMNLL STLTSKRALD LPEIGPDIAF VEHVGSERK YFVNEINYCK ASTVMWKYVL FHTSLNESN ASMGKYKVIP  
ITNRVVEKGG ESFDMILYGLA VKGQSHLRGD TDVVTVTFFE ESSTDPRVDS GKWPKYTVFR TGSLEYSGRE KSVYLRCRVN  
GTNKIQMKWG MEARCLLOS MQQMEATVEQ ESSIQGYDMT KACFKGDRVN SPKFTSIGTG EGKLVKGSFG KALRVIFTKQ  
LMHYVFGNAQ LEGFSAESRK LLLLTQALKD RKGPPWFDE GMYSGIEECI SNNPWVIQSV YWFNEWLGEF KEGSKVLESV  
DEIMDE

HA

MKAIIVLLMV VTSNADRICT GITSSNSPHY VKTATQGEVN VTGVIPLTTI PTKSHFANKL GTETRGLKCP KCLNCIDLQV  
ALGRPKCTKG IPSARVSILH EVRPVTSQGF PIMHDKTIR QLPNLLRGYE HIRLSTHNVI NAENAPGGPY KIGTSGSCP  
ITNGNGFFAT MAWAVPKNDK NKTATNPLTI EVPYICTEGE DQITVWGFHS DXETQMAKLY GDSKPKQFTS SANGVTTHYV  
SQIGGFEPNQ EDGGLPQSGR TVDYMVQKS KGTGTLTYOR GILLPOKWC ASGRSKVIGK SLPLIGEADG LHEKYGGLNK  
KIPYYTGEHA KATGNCPDW KTPLKLANGT KYRPPAKLLK ERGFFGAIAG FLEGGWEGMI AGWHYTSNG AHGVAVAADL  
KSTQEAINKI TKNLNLSSEL EVKNLQRLSG AMDELHNETI ELDEKVDDLK ADTSSQIEL AVLLSNEGII NSEDEHLLAL  
ERKLLKMLGP SAVEIGNGCF ETKHKCNQTC LDRIAAGTFD AGEFSLPTFD SLNITAASLN DDGLDNHTIL LYYSTAASSL  
AVTLMAIAFV VYMVSRRDVS CSTCL

NP

MSNMDIDGIN TGTIDKTPEE ITSGTSGTTR PIIRPATLAP PSNKRTNPS PERATISSED DVGRKTQKKI TPTEIKKSVY  
NMVVKLGEFY NQMMVKAGLN ODMERNLTQN AHAVERILLA ATDDKKTFFO KKNARDVKE GKEEDHNKTI GGTFYKMYRD  
DKTIYSPPIR ITFLKEEVKT MYK TIMGSDG FSGLNHIMIG HSQMNDCVCF RSKALKRVGL DPSSLISTFAG STVPRRSAT  
GVAIKGGGTL VAEAIRFIGN AMADRGLLRD IKAKTAYEKI LLNLKNKCSA PQOKALVDQV IGRSRNPAGIAD IEDLTLLARS  
MVVVRPSVAS KVVLPISYIA KIPOLGFNVE EYSMVGYEAM ALYNMATPVS ILRMGDDAKD KSQLEFFMSEF GAAYEDLRVL  
SALTGTTEFKP SALCKCKGF VPAKEQVEGM GAALMSIKLO FWAPMTRSGG NEVGDDGGSG QISCSPVFAV ERPIALSQA  
VRRMLSMNIE GRDADVKNL LKMMNDSMAK KTSGNATIGK KMFOISDKNK TNPIETPIKO TIPNFFFGRO TAEDYDDLDY

NA

MLPSTIQLT LFLTSGGVLL SLYVSASLSY LLYSDILLKF SPTETAPTML PLDCANASNV QAVNRSATK VTLLEPEW  
TYRPLSCPGS TFQKALLISP HRFGETKNS APLTIIREPFI ACGPNECKHF ALTHYAAQPG GYYNGTRGRD NKLRHLISVK  
LGKIPTVENS IFHMAAWSGS ACHDGKEWTY IGVDGPDNNA LLKVYGEAY TDTYHSYANK ILRTQESACH CIGGNCYIMI  
TDGSASGVSE CRFLKIREGR IIKEIFPTGR VKHTEECTCG FASNKTIECA CRDNSYAKR PFVKLVNVED TAEIRLMGTD  
TYLDTPRPND GSITGPCESN GDKSGGGIKG GFVHQRMESK IGRWYSRTMS KTERMGMGLY VKYDGPWAD SDALAFSGVM  
VSMKEPGWYS FGFEIKDKYC DVPCIGIEMV HDGGKETWHS AATAIYCLMG SQQLLDWTVT GVDMAL

NB

MNNATFNYN VNPIPHIRGS VIITICVSFI IILTIFGYIA KILTNRNNCT NNAIGLKRI KCSGCEPECN KRGDSSPRI  
GVDIAPATLP GLNLSSTPN

M1

MSLFGDTIAY LSLTDEGEG KAEALAEKLC WFGGKEFDLD SALEWIKNKR CLTDIQKALI GASICFLKPK QDERKRRTIT  
EPLSGMGITA TKKXGLTIAE RMRRRCVSFH EAFEIAEGHE SSALLYCLMV MYLNPGNYSM QVKLGTICAL CEKQASHSHR  
AHSRAARS SV PGVRRERQMV SAMNTAKTMN GMKGEDVOK LAEELQSNIG VLRLSGASQK NGEETAKDVM EVLKQSSMG  
SALVKKYL

BM2

MLEPFQILT CSFILSALHF MAWTIGHLNQ IKRGIMKIR IKGPNKETIN REVSILRHSY QKEIQAKETM KEVLSDNMEV  
LNOHITIEGL SAEETIKMGE TVLEIEELH

NS1

MANNMNTTTO IEVGPAGTAN TINFEAGILE CYERLSWQRA LDYPGQDR LN RLKRKLESRI KTHNKSEPS KRMSLEERKA  
IGVKMMKVLL FMNPSAGIEG FEPYCMKSSS NSNCTYNNW DYPSTPERCL DDEEEPEDEV DGPTEIVLRD MNNDARQKI  
KEEVNTQKEG KFRLLTIKRM RNVLSLRVLV NGTEFLKHPNG HKSLSTLHR NAYDQSGRLV AKLVATDOLT VEDEEDGHR  
LNSLFEERLE GHSKPIRAAE TAVGLVQFG QEHRLSPEEG DN

NEP

MANNMNTTTO IEWRMKKMAI GSSTHSSSVL MKDIQSOFEO LKLWESYPN VKSTDYHQK RETIRLVTEE LYLLSKRIDD  
NLFHKTVIA NSSIADMYV SLSLLETLYE MKDVVEVYSR QCL

## PB2, PB1, PA (TAP-purified)

### PB2

MERIKELRNL [MSQSR](#)TREIL TK[TTVDHMAI](#) [IK](#)KYTSGRQE KNPALRMKWM MAMK[YPITAD](#) [KRITEMIPER](#) [NEQGOTLWSK](#)  
[MNDAGSDRVM](#) [VSPLAVTWN](#) [RNGPVTSTVH](#) [YPK](#)IYK[TYFE](#) [KVER](#)LKHGTF GPVHFRNQVK IRRR[RVDINPG](#) [HADLSAKEAQ](#)  
[DVIMEVWFNP](#) [EVGARILTSE](#) [SQLTTTK](#)EKK EELQGCCK[ISP](#) [LMVAYMLERE](#) LVRKTRFLPV AGGTSSVYIE VLHLTQGTGW  
EQMYTPGGEA [RNDVDQSLI](#) [IAAR](#)NIVRRR [TVSADPLASL](#) [LEMCHSTQIG](#) [GIRMVNILRQ](#) [NPTEEQAVDI](#) [CKAAMGLRIS](#)  
[SSFSFGGTFE](#) [KRTSGSSVKR](#) [EEEVLGNLQ](#) [TLK](#)IRVHEGY [EEFTMVGRRA](#) [TAILR](#)KATRR [LIQLTVSGRD](#) [EQSIAEATIV](#)  
[AMVFSQEDCM](#) [IK](#)AVR[GDLNF](#) [VNR](#)ANQR[LNP](#) [MHQLLR](#)HFQK DAKVLFQNWG IESIDNVMGM IGILPDMTPS TEMSMRGVRI  
SKM[GVDEYSS](#) [AEKIVV](#)SIDR FLRVDRQ[RGN](#) [VLLSPEEVSE](#) [TQGTEK](#)LTIT YSSMMWEIN GPESVLVNTY QWIIRNWETV  
K[IQWSQNPTM](#) [LYNKMEFEPE](#) [QSLVPK](#)AVRG [QYSGFVRTLF](#) [QQMRDVLGTF](#) [DTAQIIKLLP](#) [FAAAPPKQSG](#) [MQFSSLTINV](#)  
[RGSGMRILVR](#) [GNSPVFNYNK](#) TTKR[LTVL](#)GK [DAGPLTEDPD](#) [EGTAGVESAV](#) [LRGFLILGKE](#) [DRRYGPALSI](#) [NELSNLAKGE](#)  
[KANVLIGQGD](#) [VVLVMKR](#)KRN [SSILTDSQTA](#) [TKR](#)IRMAIN

### PB1

[MDVNPTLLFL](#) [KVPAQNAIST](#) [TFPYTGDPPY](#) [SHGTGTGYTM](#) [DTVNR](#)THQYS ERGRWTTNTE TGAPQLNPID GPLPEDNEPS  
GYAQTCVLE AMAFLEESHP GIFETSCLET MEVVQQTRVD [KLTOGRQTYD](#) [WTLNRNQPA](#)A [TALANTIEVF](#) [RSNGLTANES](#)  
[GRLIDFLKDV](#) [MESMNKEEME](#) [ITTHFQR](#)KRR VRDNMTKKMV TQRTIGKRKQ RLNKRSYLIR [ALTLNTMTKD](#) [AERGKLRRA](#)  
[IATPGMQIRG](#) [FVYFVETLAR](#) [SICEKLEQSG](#) [LPVGGNEKKA](#) [KLANVRKMM](#) [TNSQDTEISF](#) [TITGDNTKWN](#) [ENQNPRLFLA](#)  
[MITYITRNQ](#) [EWRNVLSIA](#) [PIMFSNK](#)MAR LGK[GYMFESK](#) [SMK](#)[LRTQIPA](#) [EMLASIDLKY](#) [FNDSTR](#)KKIE KIRPLLDITV  
ASLSPGMMMG MFNMLSTVLG VSILNLGQKR HTKTTYWMDG LQSSDDFALI VNAPNHEGIQ AGVNRFYRTC [KLLGINMSKK](#)  
KSYINR[TGTF](#) [EFTSFFYR](#)YG FVANFSMELP SFGVSGINES ADMISIGVTVI [KNMINNDLG](#) [PATAQMALQC](#) [FIKDYRYTYR](#)  
CHR[GDTQIQI](#) [RRSFEIKK](#)[LW](#) [EQTHSKAGLL](#) [VSDGGPNLYN](#) [IRNLHIPEVC](#) [LKWELMDEDY](#) [QGRLCNPLNP](#) [FVNHKDIESV](#)  
[NNAVIMPAHG](#) [PAKNMEYDAV](#) [ATTHSWIPKR](#) NR[SILNTSQR](#) [GILEDEQMYQ](#) [KCCNLFEKFF](#) [PSSSYRRPVG](#) [ISSMVEAMVS](#)  
[RARIDAR](#)[IDF](#) [ESGR](#)IKK[EEF](#) [TEIMKICSTI](#) [EELRR](#)QK

### PA

MEDFVR[QCFN](#) [PMIVELAEKA](#) MK[EYGEDLKI](#) [ETNK](#)FAAICT HLEVCFMYS D FHFIDEQGES IVVELGDPNA LLKHR[FEIIE](#)  
[GRDR](#)[TIAWTV](#) [INSICNTTGA](#) [EKPFLPDLY](#) [DYKKNR](#)[FIET](#) [GVTRREVHIY](#) [YLEK](#)ANKIKS EKTHIHIFS TGEEMATK[AD](#)  
[YTLD](#)EESSRAR IK[TRLFTIRQ](#) [EMASRGLWDS](#) [FRQSERGEET](#) [IEERFEITGT](#) [MRKLADQSLP](#) [PNFSSLENFR](#) [AYVDGFEPNG](#)  
[YIEGK](#)LQMS KEVNARIEPF LKSTPRPLRL [PDGPPCSQRS](#) [KFLMDALKL](#) [SIEDPSHEGE](#) [GIPLYDAIKC](#) [MRTFFGWKEP](#)  
[NVVKPHEKGI](#) [NPNYLLSWQ](#) [VLAELQDIEN](#) [EEKIPRTKNM](#) KKTSQLK[WAL](#) [GENMAPEKVD](#) [FDDCKDVGD](#)L [KOYDSDEPEL](#)  
[RSLASWQNE](#) [FNKACELTDS](#) [SWIELDEIGE](#) [DAAPIEHIAS](#) [MRRNYFTA](#)EV [SHCRATEYIM](#) [KGVYINTALL](#) [NASCAAMDDF](#)  
[OLIPMISK](#)CR TKEGRR[KTNL](#) [YGFIIK](#)GRSH LRNDTDVVNF [VSMFESLTD](#)P [RLEPHKWEKY](#) [CVLEVGDMLL](#) [RSAIGHVSRP](#)  
MFLYVRTNGT SKIKMKWGM MRR[CLLQSLQ](#) [QIESMIEAES](#) [SVKEKDMTKE](#) [FFENKSETWP](#) [VGESPKGV](#)EE [GSIGK](#)VCRTL  
LAK[SVFN](#)SLY [ASPQLEGFSA](#) [ESRKLLLI](#)VO [ALR](#)DNLEPGT FDLGGLYEAI EECLINDPW LLNASWFNSF LTHALR

## NP (TAP-purified)

### NP

MATKGTKR[SY](#) [EQMETDGERQ](#) [NATEIR](#)ASVG [KMIDGIGREY](#) [IQMCTELKLS](#) [DYEGRLIQNS](#) [LTIERM](#)VLSA [FDERRNKYLE](#)  
[EHPSAGK](#)DPK KTGGPYIRRV DGKWRRE[ELIL](#) [YDKEEIRRIW](#) [RQANNGDDAT](#) [AGLTHMMIWH](#) [SNLNDATYQR](#) TRALVRTGMD  
PR[MCSLMQGS](#) [TLPR](#)[RSGAAG](#) [AAVKGVGT](#)MY [MELIR](#)MIKRG INDRNFWRGE NGRRTRIAYE RMCNLLKGK[E](#) [QTAAQRTMVD](#)  
[QVRESRNP](#)GN [AEFEDLIFLA](#) [RSALILRG](#)SV [AHKSCLPACV](#) [YGSVASGYD](#) [FEREGYSLVG](#) [IDPFRL](#)LQNS [QVYSLIRPNE](#)  
[NPAHKSQ](#)LW [MACHSAA](#)FED [LRVSS](#)FIRGT KVVPRGKLT [RGVQIASNEN](#) [METMES](#)STLE [LRSRYWA](#)IRT [RSGGNTNQQR](#)  
[ASSGQISIQP](#) [TFSVQRN](#)LPE [DRPTIMA](#)AFT [GNTEGR](#)TSDM RTEIIR[LMES](#) [ARPEDVS](#)FQG [RGVFELS](#)DEK [ATSPIVPS](#)FD  
[MSNEGSY](#)FFG [DNAEEYDN](#)

## Strep-purified WSN proteins

## PB2

MERIKELRNL MSQSR TREIL TKTTVDHMAI IKKYTSGRQE KNPALRMKWM MAMKYPTAD KRITEMIPER NEQGOTLWSK  
 MNDAGSDRVM VSPLAVTWNN RNPVTVSTVH YPKIYKTYFE KVERLKHGTF GPVHFRNQVK IRRVDINPG HADLSAKEAQ  
 DVIMEVVFNP EVGARILTSE SQLTTTK EKK EELQGCKISP LMVAYMLERE LVRKTRFLPV AGGTSSVYIE VLHLTGQTCW  
 EQMYTPGGEA RNDVDQSLI IAARNIVRRA TVSADPLASL LEMCHSTQIG GIRMVNILRQ NPTEEQAVDI CKAAAGLRIS  
 SSFSFGGFTF KRTSGSSVKR EEEVL TGNLQ TLKIRVHEGY EEFMTVGRRR TAILRKATR LIQLIVSGRD EQSIAEATIV  
 AMVFSQEDCM IKAVRGDLNF VNRRANQR LNP MHQLLRHFQK DAKVLFQNWG IESIDNVMG M IGILPDMTPS TEMSMRGVRI  
 SKMGVDEYSS AEKIVVSDIR FLRVRDQRGN VLLSPEEVSE TQGTKELTIT YSSMMWEIN GPESVLVNTY QWIIRNWTET  
 KIQWSQNPTM LYNKMEFEPE QSLVPAKAVRG QYSGFVRTLE QQMRDVLGTF DTAQIIKLLP FAAAPPKQSG MQFSSLTINV  
 RSGSMRILVR GNSPVFNYNK TTKRLTVLGK DAGPLTEDPD EGTAGVESAV LRGLILGKE DRRYGPALSI NELSNLAKGE  
 KANVLIGOD VVLVMKRRKN SSILTD SOTA TKRIRMAIN

## PB1

MDVNPPTLLFL KVPAQNAIST TFPYTGDPY SHGTGTGYTM DTVNRTHQYS ERGRWTTNTE TGAPQLNPID GPLPEDNEPS  
GYAQTDCVLE AMAFLEESH GIFETSCLET MEVVQQRVD KLTQGRQTYD WTLNRNQPAA TALANTIEVF RSNGLTANES  
GRLIDFLKDV MESMNKEEME ITTHFQRKRR VRDNMTKKMV TQRTIGKRKQ RLNKRSYLIR ALTLTNTMTKD AERGKLKRRA  
IATPGMQIRG FVYFVETLAR SICEKLEQSG LPVGGNEKA KLANVVRKMM TNSQDTEISF TITGDNTKWV ENQNPRMFLA  
MITYITRNQ EWFRNVLSIA PIMFSNKMAR LGKGYMFESK SMKLRQTIPA EMLASIDLKY FNDSTRKKIE KIRPLLIDGT  
ASLSPGMMMG MFNMLSTVLG VSILNLGQKR HTKTTYWWDG LQSSDDFALI VNAPNHGIIQ AGVNRFYRTC KLLGINMSK  
KSYINRTGTF EFTSFFYRYG FVANFSMELP SFGVSGINES ADMSGIVTVI KNNMINNDLG PATAQMALQL FIKDYRYTYR  
CHRGDTQIQT RRSFEIKLW EQTHSKAGLL VSDGGPNLYN IRNLHIPEVC LKWELMDEDY QGRLCNPLNP FVNHKDIESV  
NNAVIMPAHG PAKNMEYDAV ATTHSWIPKR NRSILNTSR GILEDEQMYQ KCCNLFEKEF PSSSYRRPVG ISSMVEAMVS  
RARIDARIDF ESGRIKKEEF TEIMKICSTI EELRROK

## PA

[MEDFVRQCFN](#) [PMIVELAEKA](#) [MK](#) [EYGEDLKI](#) [ETNK](#) [FAAICT](#) [HLEVCFMYS](#) [D](#) [FHFIDEQGES](#) [IVVELGDPNA](#) [LLKHR](#) [FEITE](#)  
[GRDR](#) [TIAWTV](#) [INSICNTTGA](#) [EKPKEFLPDLY](#) [DYKK](#) [NR](#) [FIEI](#) [GVTR](#) [REVHIY](#) [YLEK](#) [ANKIKS](#) [EKTHIHFSF](#) [TGEEMATKA](#)  
[YTLDEES](#) [AR](#) [IKTRLFTIRQ](#) [EMASRGLWDS](#) [FRQSER](#) [GEET](#) [IEERFEITGT](#) [MRKLAQSLP](#) [PNFSSLENFR](#) [AYVDGFEPNG](#)  
[YIEGK](#) [LSQMS](#) [KEVNARIEPF](#) [LKSTPRPLRL](#) [PDGPPCSQRS](#) [KFLMDALKL](#) [SIEDPSHEGE](#) [GIPLYDAIKC](#) [MRTFFGWK](#) [EP](#)  
[NVVVPHEKGI](#) [NPNYLLSWKO](#) [VLAELQDIEN](#) [EEKIPRTKMN](#) [KKTSQLKWAL](#) [GENMAPEKVD](#) [FDDCKDVGD](#) [KQYDSDEPEL](#)  
[RSLASWIQNE](#) [FNKACELTDS](#) [SWIELDEIGE](#) [DAAPIEHAS](#) [MRRNYFTAEV](#) [SHCRATEYIM](#) [KGVYINTALL](#) [NASCAAMDDF](#)  
[QLIPMISK](#) [CR](#) [TKEGRRK](#) [TNL](#) [YGFIIKGRSH](#) [LR](#) [NDTDVVNF](#) [VSMEFSLTDP](#) [R](#) [LEPHKWEKY](#) [CVLEVGDMLL](#) [R](#) [SAIGHVSRP](#)  
[MFLYVRTGT](#) [SKIKMKWGME](#) [MRR](#) [RCLLQSLQ](#) [QIESMIEAES](#) [SVK](#) [EKDMTKE](#) [FFENK](#) [SETWP](#) [VGESPKGVEE](#) [GSIGK](#) [VCRTL](#)  
[LAKSVFNSLY](#) [ASPOLEGFSA](#) [ESRKLLLTVO](#) [ALRDNLEPGT](#) [FDLGLLYEAI](#) [EECLNDPWV](#) [LLNASWFNSF](#) [LTHALR](#)

## HA

MKAFLVLVLLY AFVATDADTI CIGYHANNST DTVDITFEKN VAVTHSVNLL EDHRHGKCLKK LKGIAPLOLQ KCNITGWLLG  
 NPCEDSLPPA RSWSYIVETP NSENGACYPG DFIDYEELR QLSSVSSLER FEIFPKESSW PNHTFNGVTV SCSHRGKSSF  
 YRNLLWLTKK GDSYPKLTNS YVNNKGKEVL VLVGVHHPSS SDEQQSLYSN GNAYSVASS NYNRRFTPEI AARPKVKDQH  
 GRMNYWTLL EPGDTIIFEA TGNLIAPWYA FALSRGFESG IITSNASMHE CNTKCTPQPG SINSNLPFQN IHPVTIGECF  
 KYVRSTKLRM VTGLRNIPSI QYRGLFGAIA GFIEGGWTGM IDGWYGYHHQ NEQSGGYAAD QKSTQNAING ITNKVNSVIE  
KMNTQFTAVG KEFNMLEKRM ENLNKKVDDG FLDIWTYNAE LLVLENER T LDFHDLNVKN LYEKVKSQLK NNAKEIGNGC  
 FEFYHKCDNE CMESVRNGTY DYPKYSEESK LNREKIDGVK LESMGVYQIL AIYSTVASSL VLLVSLGAIS FWMCSNGSLQ  
 CRCT

## NP

MATKGTKRSY EQMETDGERQ NATEIRASVG KMIDGIGRFY IQMCTELKLS DYEGRLIQNS LTIERMVLSA FDERRNKYLE  
EHPSAGKDPK KTGGPIYRV DGKWRRELIL YDKEEIRRIW RQANNGDDAT AGLTHMMIWH SNLNATYQYR TRALVRTGMD  
PRMCSLMQGS TLPRSGAAG AAVKGVGTMV MELIRMIKRG INDRNFWRGE NGRRTRIAYE RMCNILKGKF QTAAQRTMVD  
QVRESRNPNG AEFEDLIFLA RSALILRGSV AHKSCLPACV YGSVASGYD FEREGYSLVG IDPFRLLQNS QVYSLIRPNE  
NPAHKSQVLW MACHSAAFED LRVSSIRGT KVVPRGKLST RGVQIASNEN METMESSTLE LRSRYWAIRT RSGGNTNQOR  
ASSGQISIQP TFSVQRNLPF DRPTIMAAFT GNTEGRTSDM RTEIIRLMES ARPEDEVSFQG RGVFELSDEK ATSPIVPSFD  
MSNEGSYFFG DNAEFDYD

## M1

MSLLTEVETVY VLSIVPSGPL KAETIAQRLED VFAGKNTDLE VLMEWLKTRP ILSPLTKGIL GFVFTLTVP S ERGLQRRRFV  
QNALNGNGDP NNMDKAVKLY RKLKREITFH GAKEIALSYS AGALASCMGL IYNRMGA VTT EVAFLVCAT CEQIADSQHR  
SHRQMVTTTN PLIRHENRMV LASTTAKAME QMAGSSEQAA EAMDIASQAR QMVQAMRTIG THPSSSAGLK DDLENLQAY  
QKRMGVOMOR EK

## NS1

MDPNTVSSSQ VDCFLWHVRK **KVADQELGDA** **PFLDR**LRRDQ KSLRGR**GSTL** **GLDIETATRA** GKQIVER**ILK** **EESDEALKMT**  
**MASVPASRYL** **TDMTLEEMSR** **HWFMLMPKQK** **VAGPLCIRMD** **QAIMDKNIIL** **KANFSVIFDR** **LETILLRAF** **TEEGTIVGEI**  
**SPLPSLPGHT** **DEDVKNAVGV** **LIGGLEWNNN** **TVRVSETLQ** **FAWRSSNENG** **RPPLTPKQKR** **KMAGTIRSEV**

## WSN proteins from 293T cell lysates

NP MATKGTKRRSY EQMETDGERQ NATEIRASVG KMIDGIGRFY IQMCTELKLS DYEGRLIQNS LTIERMVLSA FDERRNKYLE  
EHPSAGKDPK KTGGPIYRRV DGKWRREELIL YDKEEIRRIW RQANNGDDAT AGLTHMMIWH SNLNDATYQR TRALVRTGMD  
PRMCSLMQGS TLPRRSGAAG AAVKGVGTMV MELIRMIKRG INDRNFWRGE NGRRTRIAYE RMCNILKGKF QTAAQRTMVD  
QVRESRNPGN AEFEDLIFLA RSALILRGSV AHKSCLPACV YGSAVASGYD FEREGYSLVG IDPFRLLQNS QVYSLIRPNE  
NPAHKSQVLW MACHSAAFED LRVSSFIRGT KVVPRGKLST RGVQIASNEN METMESSTLE LRSRYWAIRT RSGGNTNQQR  
ASSGQISIQP TFSVQRNLPE DRPTIMAAFT GNTEGRTSDM RTEIIRLMES ARPEDVSFQG RGVFELSDEK ATSPIVPSFD  
MSNEGSYFFG DNAEEYDN

M1 MSLLTEVETY VLSIVPSGPL KAEIAQRLED VFAGKNTDLE VLMEWLKTRP ILSPLTKGIL GFVFTLTVPs ERGLQRRRFV  
QNALNGNDP NNMDKAVKLY RKLKREEITFH GAKEIALSYS AGALASCMGL IYNRMGAVTT EVAFLGVCAT CEQIADSQHR  
SHRQMVTTTN PLIRHENRMV LASTTAKAME QMAGSSEQAA EAMDIASQAR QMVQAMRTIG THPSSSAGLK DDLLENLQAY  
QKRMGVQMQR FK

M2 MSLLTEVETP IRNEWGCRCN DSSDPLVIAA NIIIEILHLIL WILDRLEFFKC IYRRFKYGLK RGPSTEGVPE SMREEYRKEO  
QNAVDVDDGH FVNIELE

NS1 MDPNTVSSFQ VDCFLWHVRK RVADQELGDA PFLDRLRRDQ KSLRGRGSTL GLDIETATRA GKQIVERILK EESDEALKMT  
MASVPASRYL TDMTLEEMSR HWFMLMPKQK VAGPLCIRMD QAIMDKNIIL KANFSVIFDR LETLILLRAF TEEGTIVGEI  
SPLPSLPGHT DEDVKNAVGV LIGGLEWNNN TVRVSETLQR FAWRSSNENG RPPLTPKQKR KMAGTIRSEV

## WSN proteins from MDBK cell lysates

NP MATKGTKRSY EQMETDGERQ NATEIRASVG KMIDGIGRFY IQMCTELKLS DYEGRLIQNS LTIERMVLSA FDERRNKYLE  
EHPSAGKDPK KTGGPYYRRV DGKWRRELIL YDKEEIRRIW RQANNGDDAT AGLTHMMIWH SNLNDATYQR TRALVRTGMD  
PRMCSLMQGS TLPRRSGAAG AAVKGVGTMV MELIRMIKRG INDRNFWRGE NGRRTRIAYE RMCNILKGKE QTAAQRTMVD  
QVRESRNPGN AEFEDLIFLA RSALILRGSV AHKSCLPACV YGSAVASGYD FEREGYSLVG IDPFRLLQNS QVYSLIRPNE  
NPAHKSQVLW MACHSAAFED LRVSSFIRGT KVVPRGKLST RGVQIASNEN METMESSTLE LRSRYWAIRT RSGGNTNQQR  
ASSGQISIQP TFSVQRNLPE DRPTIMAAFT GNTEGRTSDM RTEIIRLMES ARPEDVSFQG RGVFELSDEK ATSPIVPSFD  
MSNEGSYFFG DNAEEYDN

M1 MSLLTEVETY VLSIVPSGPL KAEIAQRLED VFAGKNTDLE VLMEWLKTRP ILSPLTKGIL GFVFTLTVPs ERGLQRRRFV  
QNALNGNDP NNMDKAVKLY RKLKREITFH GAKEIALSYS AGALASCMGL IYNRMGAVTT EVAFLGVCAT CEQIADSQHR  
SHRQMVTTTN PLIRHENRMV LASTTAKAME QMAGSSEQAA EAMDIASQAR QMVQAMRTIG THPSSSAGLK DDLLENLQAY  
QKRMGVQMQR FK

NS1 MDPNTVSSFQ VDCFLWHVRK RVADQELGDA PFLDRLRRDQ KSLRGRGSTL GLDIETATRA GKQIVERILK EESDEALKMT  
MASVPASRYL TDMTLEEMSR HWFMLMPKQK VAGPLCIRMD QAIMDKNIIL KANFSVIFDR LETLILLRAF TEEGTIVGEI  
SPLPSLPGHT DEDVKNAVGV LIGGLEWNNN TVRVSETLQR FAWRSSNENG RPPLTPKQKR KMAGTIRSEV
