# Supplementary material for: Mapping the Phosphoproteome of Influenza A and B Viruses by Mass Spectrometry
Source: PubMed Central journal article supplement (PMC3493474; doi:10.1371/journal.ppat.1002993), 2012-11-08
Supplement: ppat.1002993.s003.pdf [file ppat.1002993.s003.pdf]

**Influenza A/WSN/33**  
**N-terminal peptide spectra**

**Mascot Search Results**

**Peptide View**

MS/MS Fragmentation of **MDVNPTLLFLK**  
 Found in **PBI**

Match to Query 1987: 1331.714600 from(666.864576,2+)

Title: Elution from: 40.937 to 40.937 period: 0 experiment: 1 cycles: 1 precIntensity: 462945.0 FinneganScanNumber: 3064 MStype: enumIsNormalMS rawFile: B110401\_016.RAW

Data file file1\_B110401\_016.mgf

Click mouse within plot area to zoom in by factor of two about that point

Or, Plot from  to  Da

Label all possible matches  Label matches used for scoring

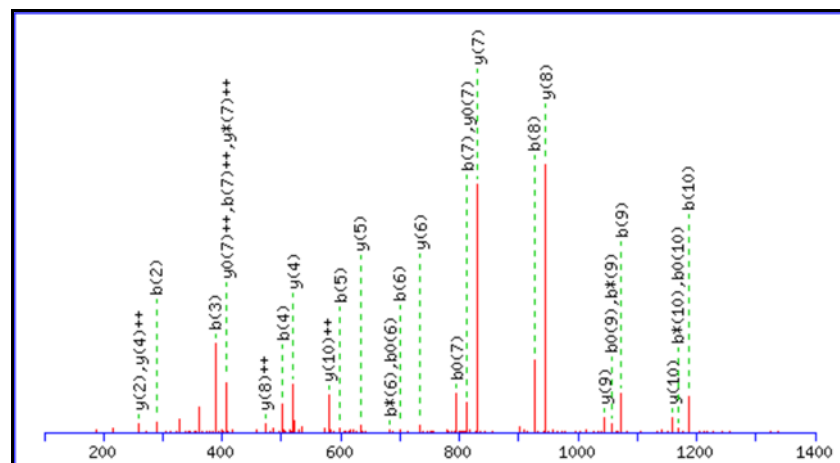

Monoisotopic mass of neutral peptide  $M_r(\text{calc})$ : 1331.7159

Fixed modifications: Carbamidomethyl (C) (apply to specified residues or termini only)

Variable modifications:

N-term : Acetyl (Protein N-term)

Ions Score: 77 Expect: 3.8e-06

Matches : 32/102 fragment ions using 34 most intense peaks ([help](#))

| #  | b                | b <sup>++</sup> | b*               | b <sup>*++</sup> | b <sup>0</sup>   | b <sup>0++</sup> | Seq. | y                | y <sup>++</sup> | y*        | y <sup>*++</sup> | y <sup>0</sup>  | y <sup>0++</sup> | #  |
|----|------------------|-----------------|------------------|------------------|------------------|------------------|------|------------------|-----------------|-----------|------------------|-----------------|------------------|----|
| 1  | 174.0583         | 87.5328         |                  |                  |                  |                  | M    |                  |                 |           |                  |                 |                  | 11 |
| 2  | <b>289.0853</b>  | 145.0463        |                  |                  | 271.0747         | 136.0410         | D    | <b>1159.6721</b> | <b>580.3397</b> | 1142.6456 | 571.8264         | 1141.6616       | 571.3344         | 10 |
| 3  | <b>388.1537</b>  | 194.5805        |                  |                  | 370.1431         | 185.5752         | V    | <b>1044.6452</b> | 522.8262        | 1027.6186 | 514.3130         | 1026.6346       | 513.8210         | 9  |
| 4  | <b>502.1966</b>  | 251.6019        | 485.1701         | 243.0887         | 484.1860         | 242.5967         | N    | <b>945.5768</b>  | <b>473.2920</b> | 928.5502  | 464.7788         | 927.5662        | 464.2867         | 8  |
| 5  | <b>599.2494</b>  | 300.1283        | 582.2228         | 291.6151         | 581.2388         | 291.1230         | P    | <b>831.5339</b>  | 416.2706        | 814.5073  | <b>407.7573</b>  | <b>813.5233</b> | <b>407.2653</b>  | 7  |
| 6  | <b>700.2971</b>  | 350.6522        | <b>683.2705</b>  | 342.1389         | <b>682.2865</b>  | 341.6469         | T    | <b>734.4811</b>  | 367.7442        | 717.4545  | 359.2309         | 716.4705        | 358.7389         | 6  |
| 7  | <b>813.3811</b>  | <b>407.1942</b> | 796.3546         | 398.6809         | <b>795.3706</b>  | 398.1889         | L    | <b>633.4334</b>  | 317.2203        | 616.4069  | 308.7071         |                 |                  | 5  |
| 8  | <b>926.4652</b>  | 463.7362        | 909.4386         | 455.2230         | 908.4546         | 454.7309         | L    | <b>520.3493</b>  | <b>260.6783</b> | 503.3228  | 252.1650         |                 |                  | 4  |
| 9  | <b>1073.5336</b> | 537.2704        | <b>1056.5070</b> | 528.7572         | <b>1055.5230</b> | 528.2652         | F    | <b>407.2653</b>  | 204.1363        | 390.2387  | 195.6230         |                 |                  | 3  |
| 10 | <b>1186.6177</b> | 593.8125        | <b>1169.5911</b> | 585.2992         | <b>1168.6071</b> | 584.8072         | L    | <b>260.1969</b>  | 130.6021        | 243.1703  | 122.0888         |                 |                  | 2  |
| 11 |                  |                 |                  |                  |                  |                  | K    | 147.1128         | 74.0600         | 130.0863  | 65.5468          |                 |                  | 1  |

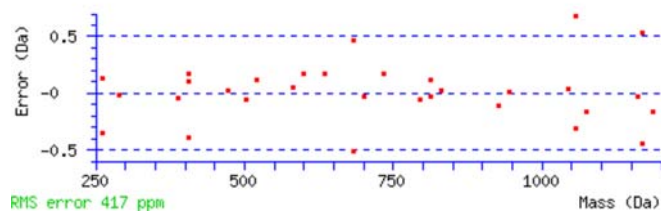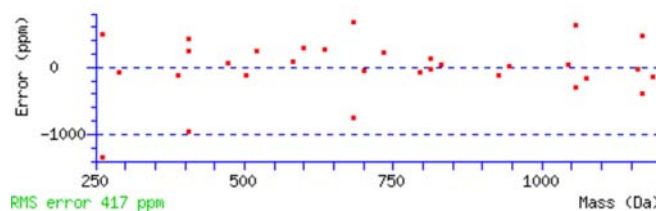

NCBI BLAST search of **MDVNPTLLFLK**

(Parameters: blastp, nr protein database, expect=20000, no filter, PAM30)

Other BLAST [web gateways](#)

All matches to this query

| Score | Mr(calc): | Delta   | Sequence                      |
|-------|-----------|---------|-------------------------------|
| 76.8  | 1331.7159 | -0.0013 | <a href="#">MDVNPTLLFLK</a>   |
| 20.4  | 1331.7074 | 0.0072  | <a href="#">RKSLHENKLK</a>    |
| 16.4  | 1331.7384 | -0.0238 | <a href="#">HIHLMPLSQIK</a>   |
| 14.9  | 1331.6907 | 0.0239  | <a href="#">YIKDYMXXSIK</a>   |
| 14.8  | 1331.7006 | 0.0140  | <a href="#">LESMLQLELAGLK</a> |
| 14.5  | 1331.6962 | 0.0184  | <a href="#">QLEISHRKLK</a>    |
| 13.2  | 1331.7296 | -0.0150 | <a href="#">DKIKENSEKIK</a>   |
| 12.5  | 1331.7318 | -0.0172 | <a href="#">QMKMKVHRFK</a>    |
| 11.2  | 1331.7006 | 0.0140  | <a href="#">LKQQVMDEVIK</a>   |
| 11.1  | 1331.7214 | -0.0068 | <a href="#">NVLLPQLSLAGK</a>  |

Mascot: <http://www.matrixscience.com/>

# MASCOT SCIENCE Mascot Search Results

## Peptide View

MS/MS Fragmentation of **MSLLTEVETYVLSIVPSGPLK**  
Found in **M1**

Match to Query 4783: 2275.235906 from(1138.625229,2+)

Title: Elution from: 102.078 to 102.078 period: 0 experiment: 1 cycles: 1 precIntensity: 221931.0 FinneganScanNumber: 8062

MStype: enumIsNormalMS rawFile: B110210\_012.RAW

Data file file1\_B110210\_012.mgf

Click mouse within plot area to zoom in by factor of two about that point

Or, Plot from  to  Da

Label all possible matches  Label matches used for scoring

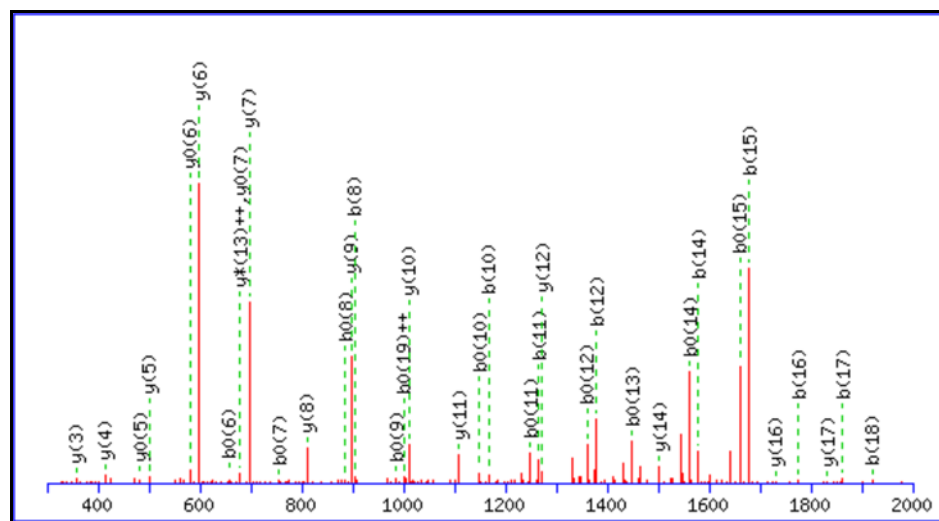

Monoisotopic mass of neutral peptide  $M_r(\text{calc})$ : 2275.2385

Fixed modifications: Carbamidomethyl (C) (apply to specified residues or termini only)

Ions Score: 98 Expect: 1.6e-08

Matches : 37/190 fragment ions using 49 most intense peaks ([help](#))

| #  | b                | b <sup>++</sup> | b <sup>0</sup>   | b <sup>0++</sup> | Seq.     | y                | y <sup>++</sup> | y*        | y* <sup>++</sup> | y <sup>0</sup>  | y <sup>0++</sup> | #         |
|----|------------------|-----------------|------------------|------------------|----------|------------------|-----------------|-----------|------------------|-----------------|------------------|-----------|
| 1  | 132.0478         | 66.5275         |                  |                  | <b>M</b> |                  |                 |           |                  |                 |                  | <b>21</b> |
| 2  | 219.0798         | 110.0435        | 201.0692         | 101.0382         | <b>S</b> | 2145.2053        | 1073.1063       | 2128.1788 | 1064.5930        | 2127.1947       | 1064.1010        | <b>20</b> |
| 3  | 332.1639         | 166.5856        | 314.1533         | 157.5803         | <b>L</b> | 2058.1733        | 1029.5903       | 2041.1467 | 1021.0770        | 2040.1627       | 1020.5850        | <b>19</b> |
| 4  | 445.2479         | 223.1276        | 427.2374         | 214.1223         | <b>L</b> | 1945.0892        | 973.0482        | 1928.0627 | 964.5350         | 1927.0787       | 964.0430         | <b>18</b> |
| 5  | 546.2956         | 273.6514        | 528.2850         | 264.6462         | <b>T</b> | <b>1832.0052</b> | 916.5062        | 1814.9786 | 907.9929         | 1813.9946       | 907.5009         | <b>17</b> |
| 6  | 675.3382         | 338.1727        | <b>657.3276</b>  | 329.1675         | <b>E</b> | <b>1730.9575</b> | 865.9824        | 1713.9309 | 857.4691         | 1712.9469       | 856.9771         | <b>16</b> |
| 7  | 774.4066         | 387.7069        | <b>756.3960</b>  | 378.7017         | <b>V</b> | 1601.9149        | 801.4611        | 1584.8883 | 792.9478         | 1583.9043       | 792.4558         | <b>15</b> |
| 8  | <b>903.4492</b>  | 452.2282        | <b>885.4386</b>  | 443.2230         | <b>E</b> | <b>1502.8465</b> | 751.9269        | 1485.8199 | 743.4136         | 1484.8359       | 742.9216         | <b>14</b> |
| 9  | 1004.4969        | 502.7521        | <b>986.4863</b>  | 493.7468         | <b>T</b> | 1373.8039        | 687.4056        | 1356.7773 | <b>678.8923</b>  | 1355.7933       | 678.4003         | <b>13</b> |
| 10 | <b>1167.5602</b> | 584.2837        | <b>1149.5496</b> | 575.2785         | <b>Y</b> | <b>1272.7562</b> | 636.8817        | 1255.7297 | 628.3685         | 1254.7456       | 627.8765         | <b>12</b> |
| 11 | <b>1266.6286</b> | 633.8179        | <b>1248.6181</b> | 624.8127         | <b>V</b> | <b>1109.6929</b> | 555.3501        | 1092.6663 | 546.8368         | 1091.6823       | 546.3448         | <b>11</b> |
| 12 | <b>1379.7127</b> | 690.3600        | <b>1361.7021</b> | 681.3547         | <b>L</b> | <b>1010.6245</b> | 505.8159        | 993.5979  | 497.3026         | 992.6139        | 496.8106         | <b>10</b> |
| 13 | 1466.7447        | 733.8760        | <b>1448.7341</b> | 724.8707         | <b>S</b> | <b>897.5404</b>  | 449.2738        | 880.5138  | 440.7606         | 879.5298        | 440.2686         | <b>9</b>  |
| 14 | <b>1579.8288</b> | 790.4180        | <b>1561.8182</b> | 781.4127         | <b>I</b> | <b>810.5084</b>  | 405.7578        | 793.4818  | 397.2445         | 792.4978        | 396.7525         | <b>8</b>  |
| 15 | <b>1678.8972</b> | 839.9522        | <b>1660.8866</b> | 830.9469         | <b>V</b> | <b>697.4243</b>  | 349.2158        | 680.3978  | 340.7025         | <b>679.4137</b> | 340.2105         | <b>7</b>  |
| 16 | <b>1775.9500</b> | 888.4786        | 1757.9394        | 879.4733         | <b>P</b> | <b>598.3559</b>  | 299.6816        | 581.3293  | 291.1683         | <b>580.3453</b> | 290.6763         | <b>6</b>  |
| 17 | <b>1862.9820</b> | 931.9946        | 1844.9714        | 922.9893         | <b>S</b> | <b>501.3031</b>  | 251.1552        | 484.2766  | 242.6419         | <b>483.2926</b> | 242.1499         | <b>5</b>  |
| 18 | <b>1920.0034</b> | 960.5054        | 1901.9929        | 951.5001         | <b>G</b> | <b>414.2711</b>  | 207.6392        | 397.2445  | 199.1259         |                 |                  | <b>4</b>  |

|    |           |           |           |           |   |          |          |          |          |  |  |   |
|----|-----------|-----------|-----------|-----------|---|----------|----------|----------|----------|--|--|---|
| 19 | 2017.0562 | 1009.0317 | 1999.0456 | 1000.0265 | P | 357.2496 | 179.1285 | 340.2231 | 170.6152 |  |  | 3 |
| 20 | 2130.1403 | 1065.5738 | 2112.1297 | 1056.5685 | L | 260.1969 | 130.6021 | 243.1703 | 122.0888 |  |  | 2 |
| 21 |           |           |           |           | K | 147.1128 | 74.0600  | 130.0863 | 65.5468  |  |  | 1 |

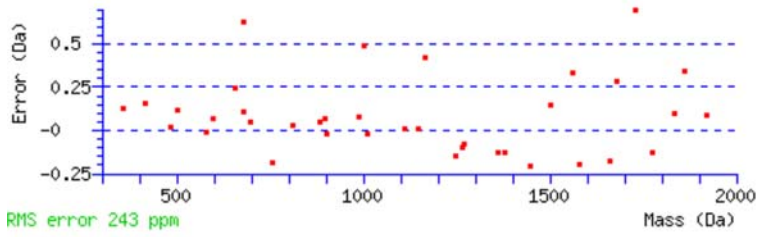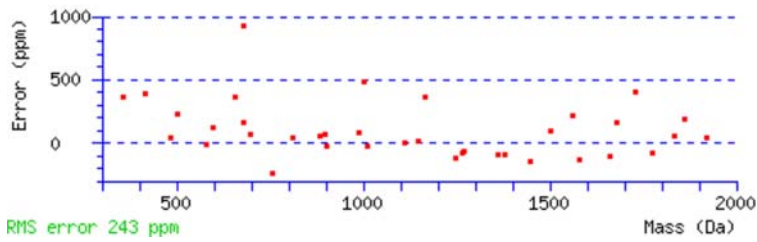

NCBI **BLAST** search of [MSLLTEVETYVLSIVPSGPLK](#)  
 (Parameters: blastp, nr protein database, expect=20000, no filter, PAM30)  
 Other BLAST [web gateways](#)

**All matches to this query**

| Score | Mr(calc): | Delta   | Sequence                                 |
|-------|-----------|---------|------------------------------------------|
| 98.4  | 2275.2385 | -0.0026 | <a href="#">MSLLTEVETYVLSIVPSGPLK</a>    |
| 14.4  | 2275.2089 | 0.0270  | <a href="#">LALFRNNENKVSVIKPPEK</a>      |
| 8.1   | 2275.2341 | 0.0018  | <a href="#">TRIAEVGGVPYLLPLVNEKK</a>     |
| 4.9   | 2275.2246 | 0.0113  | <a href="#">QILLGPNTGLSGGMPGALPSLPGK</a> |
| 4.9   | 2275.2246 | 0.0113  | <a href="#">QILLGPNTGLSGGMPGALPSLPGK</a> |
| 3.3   | 2275.2228 | 0.0131  | <a href="#">DLKGALQKLLLSKNPFAQPL</a>     |
| 2.0   | 2275.2220 | 0.0139  | <a href="#">MEPDIKMKIAWRYQLLPK</a>       |
| 1.9   | 2275.2664 | -0.0305 | <a href="#">VLDKISIGRLVSLLSNNLNK</a>     |
| 1.9   | 2275.2228 | 0.0131  | <a href="#">DLKGALQKLLLSKNPFAQPL</a>     |
| 1.7   | 2275.2172 | 0.0187  | <a href="#">AAAPSLGEGGGIVSVSPGPLPTR</a>  |

**Mascot:** <http://www.matrixscience.com/>

# MASCOT SCIENCE Mascot Search Results

## Peptide View

MS/MS Fragmentation of **MSLLTEVETYVLSIVPSGPLK**  
 Found in **M1**

Match to Query 4937: 2317.247888 from(1159.631220,2+)

Title: Elution from: 109.168 to 109.168 period: 0 experiment: 1 cycles: 1 precIntensity: 25399.0 FinneganScanNumber: 8597

MStype: enumIsNormalMS rawFile: B110210\_012.RAW

Data file file1\_B110210\_012.mgf

Click mouse within plot area to zoom in by factor of two about that point

Or, Plot from  to  Da

Label all possible matches  Label matches used for scoring

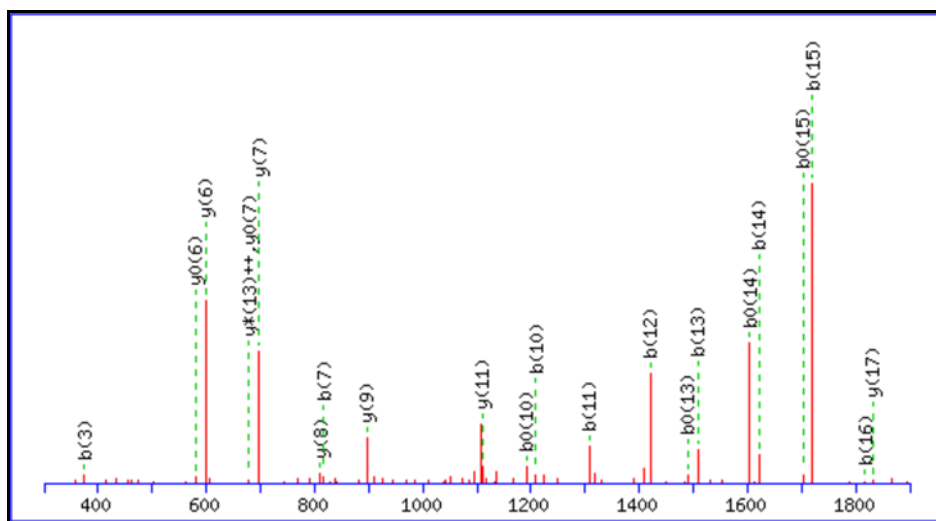

Monoisotopic mass of neutral peptide Mr(calc): 2317.2491

Fixed modifications: Carbamidomethyl (C) (apply to specified residues or termini only)

Variable modifications:

N-term : Acetyl (Protein N-term)

Ions Score: 56 Expect: 4.3e-05

Matches : 22/190 fragment ions using 32 most intense peaks ([help](#))

| #  | b                | b <sup>++</sup> | b <sup>0</sup>   | b <sup>0++</sup> | Seq. | y                | y <sup>++</sup> | y*        | y <sup>*++</sup> | y <sup>0</sup>  | y <sup>0++</sup> | #  |
|----|------------------|-----------------|------------------|------------------|------|------------------|-----------------|-----------|------------------|-----------------|------------------|----|
| 1  | 174.0583         | 87.5328         |                  |                  | M    |                  |                 |           |                  |                 |                  | 21 |
| 2  | 261.0904         | 131.0488        | 243.0798         | 122.0435         | S    | 2145.2053        | 1073.1063       | 2128.1788 | 1064.5930        | 2127.1947       | 1064.1010        | 20 |
| 3  | <b>374.1744</b>  | 187.5908        | 356.1639         | 178.5856         | L    | 2058.1733        | 1029.5903       | 2041.1467 | 1021.0770        | 2040.1627       | 1020.5850        | 19 |
| 4  | 487.2585         | 244.1329        | 469.2479         | 235.1276         | L    | 1945.0892        | 973.0482        | 1928.0627 | 964.5350         | 1927.0787       | 964.0430         | 18 |
| 5  | 588.3062         | 294.6567        | 570.2956         | 285.6514         | T    | <b>1832.0052</b> | 916.5062        | 1814.9786 | 907.9929         | 1813.9946       | 907.5009         | 17 |
| 6  | 717.3488         | 359.1780        | 699.3382         | 350.1727         | E    | 1730.9575        | 865.9824        | 1713.9309 | 857.4691         | 1712.9469       | 856.9771         | 16 |
| 7  | <b>816.4172</b>  | 408.7122        | 798.4066         | 399.7069         | V    | 1601.9149        | 801.4611        | 1584.8883 | 792.9478         | 1583.9043       | 792.4558         | 15 |
| 8  | 945.4598         | 473.2335        | 927.4492         | 464.2282         | E    | 1502.8465        | 751.9269        | 1485.8199 | 743.4136         | 1484.8359       | 742.9216         | 14 |
| 9  | 1046.5074        | 523.7574        | 1028.4969        | 514.7521         | T    | 1373.8039        | 687.4056        | 1356.7773 | <b>678.8923</b>  | 1355.7933       | 678.4003         | 13 |
| 10 | <b>1209.5708</b> | 605.2890        | <b>1191.5602</b> | 596.2837         | Y    | 1272.7562        | 636.8817        | 1255.7297 | 628.3685         | 1254.7456       | 627.8765         | 12 |
| 11 | <b>1308.6392</b> | 654.8232        | 1290.6286        | 645.8179         | V    | <b>1109.6929</b> | 555.3501        | 1092.6663 | 546.8368         | 1091.6823       | 546.3448         | 11 |
| 12 | <b>1421.7232</b> | 711.3653        | 1403.7127        | 702.3600         | L    | 1010.6245        | 505.8159        | 993.5979  | 497.3026         | 992.6139        | 496.8106         | 10 |
| 13 | <b>1508.7553</b> | 754.8813        | <b>1490.7447</b> | 745.8760         | S    | <b>897.5404</b>  | 449.2738        | 880.5138  | 440.7606         | 879.5298        | 440.2686         | 9  |
| 14 | <b>1621.8393</b> | 811.4233        | <b>1603.8288</b> | 802.4180         | I    | <b>810.5084</b>  | 405.7578        | 793.4818  | 397.2445         | 792.4978        | 396.7525         | 8  |
| 15 | <b>1720.9078</b> | 860.9575        | <b>1702.8972</b> | 851.9522         | V    | <b>697.4243</b>  | 349.2158        | 680.3978  | 340.7025         | <b>679.4137</b> | 340.2105         | 7  |
| 16 | <b>1817.9605</b> | 909.4839        | 1799.9500        | 900.4786         | P    | <b>598.3559</b>  | 299.6816        | 581.3293  | 291.1683         | <b>580.3453</b> | 290.6763         | 6  |
| 17 | 1904.9925        | 952.9999        | 1886.9820        | 943.9946         | S    | 501.3031         | 251.1552        | 484.2766  | 242.6419         | 483.2926        | 242.1499         | 5  |

|    |           |           |           |           |          |          |          |          |          |  |  |          |
|----|-----------|-----------|-----------|-----------|----------|----------|----------|----------|----------|--|--|----------|
| 18 | 1962.0140 | 981.5106  | 1944.0034 | 972.5054  | <b>G</b> | 414.2711 | 207.6392 | 397.2445 | 199.1259 |  |  | <b>4</b> |
| 19 | 2059.0668 | 1030.0370 | 2041.0562 | 1021.0317 | <b>P</b> | 357.2496 | 179.1285 | 340.2231 | 170.6152 |  |  | <b>3</b> |
| 20 | 2172.1508 | 1086.5791 | 2154.1403 | 1077.5738 | <b>L</b> | 260.1969 | 130.6021 | 243.1703 | 122.0888 |  |  | <b>2</b> |
| 21 |           |           |           |           | <b>K</b> | 147.1128 | 74.0600  | 130.0863 | 65.5468  |  |  | <b>1</b> |

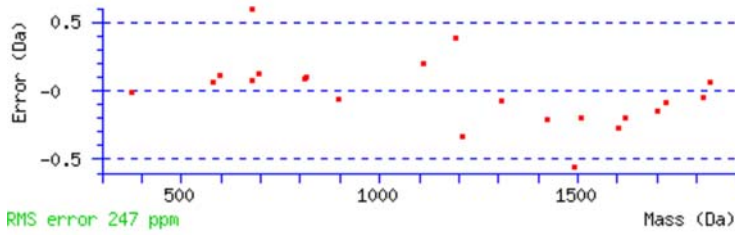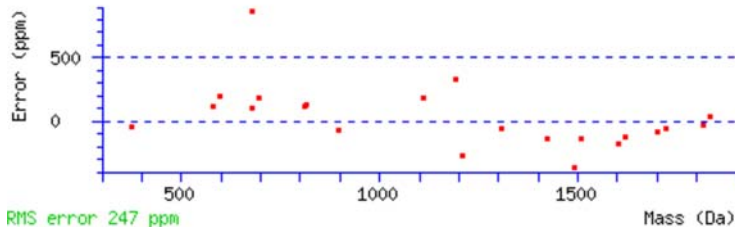

NCBI **BLAST** search of [MSLLTEVETYVLSIVPSGPLK](#)  
 (Parameters: blastp, nr protein database, expect=20000, no filter, PAM30)  
 Other BLAST [web gateways](#)

**All matches to this query**

| Score | Mr(calc): | Delta   | Sequence                               |
|-------|-----------|---------|----------------------------------------|
| 56.4  | 2317.2491 | -0.0012 | <a href="#">MSLLTEVETYVLSIVPSGPLK</a>  |
| 9.3   | 2317.2294 | 0.0185  | <a href="#">QELQNLVAIPEKEKTKLQK</a>    |
| 9.3   | 2317.2294 | 0.0185  | <a href="#">QELQNLVAIPEKEKTKLQK</a>    |
| 9.3   | 2317.2294 | 0.0185  | <a href="#">QELQNLVAIPEKEKTKLQK</a>    |
| 8.6   | 2317.2502 | -0.0023 | <a href="#">DPLLSQRISLTLASLHAHSRK</a>  |
| 8.1   | 2317.2364 | 0.0115  | <a href="#">KRVQIVGYLAWIISLGTIK</a>    |
| 6.8   | 2317.2053 | 0.0426  | <a href="#">QLAVGKQNGTVVQYLP TLQEK</a> |
| 6.8   | 2317.2053 | 0.0426  | <a href="#">QLAVGKQNGTVVQYLP TLQEK</a> |
| 6.8   | 2317.2364 | 0.0115  | <a href="#">KRVQIVGYLAWIISLGTIK</a>    |
| 6.5   | 2317.2901 | -0.0422 | <a href="#">MLPLSLLKTAQNHPMLVELK</a>   |

**Mascot:** <http://www.matrixscience.com/>

# Mascot Search Results

## Peptide View

MS/MS Fragmentation of **MSSLTEVETYVLSIVPSGPLKAEIAQR**  
 Found in **M1**

Match to Query 6470: 2943.599085 from(982.206971,3+)

Title: Elution from: 99.832 to 99.832 period: 0 experiment: 1 cycles: 1 precIntensity: 11664.0 FinneganScanNumber: 7886 MStype: enumIsNormalMS rawFile: B110210\_012.RAW  
 Data file file1\_B110210\_012.mgf

Click mouse within plot area to zoom in by factor of two about that point

Or, Plot from  to  Da

Label all possible matches  Label matches used for scoring

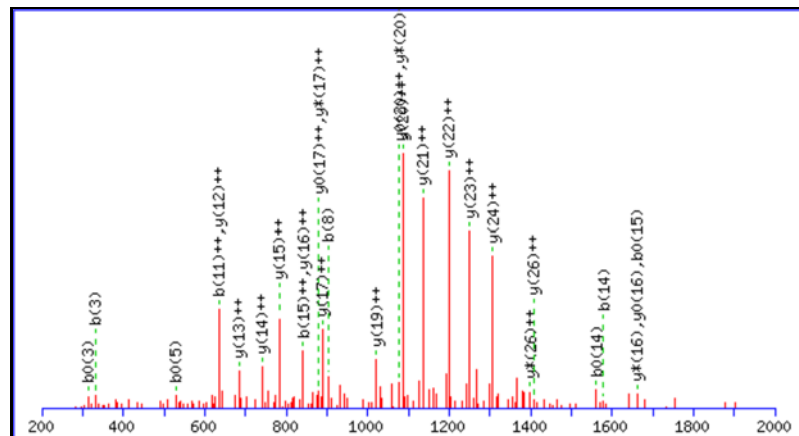

Monoisotopic mass of neutral peptide Mr(calc): 2943.5991  
 Fixed modifications: Carbamidomethyl (C) (apply to specified residues or termini only)  
 Ions Score: 86 Expect: 5.1e-07  
 Matches : 29/262 fragment ions using 32 most intense peaks ([help](#))

| #  | b                | b <sup>++</sup> | b <sup>*</sup> | b <sup>*++</sup> | b <sup>0</sup>   | b <sup>0++</sup> | Seq. | y         | y <sup>++</sup>  | y <sup>*</sup>   | y <sup>*++</sup> | y <sup>0</sup>   | y <sup>0++</sup> | #  |
|----|------------------|-----------------|----------------|------------------|------------------|------------------|------|-----------|------------------|------------------|------------------|------------------|------------------|----|
| 1  | 132.0478         | 66.5275         |                |                  |                  |                  | M    |           |                  |                  |                  |                  |                  | 27 |
| 2  | 219.0798         | 110.0435        |                |                  | 201.0692         | 101.0382         | S    | 2813.5659 | 1407.2866        | 2796.5393        | 1398.7733        | 2795.5553        | 1398.2813        | 26 |
| 3  | <b>332.1639</b>  | 166.5856        |                |                  | <b>314.1533</b>  | 157.5803         | L    | 2726.5339 | 1363.7706        | 2709.5073        | 1355.2573        | 2708.5233        | 1354.7653        | 25 |
| 4  | 445.2479         | 223.1276        |                |                  | 427.2374         | 214.1223         | L    | 2613.4498 | <b>1307.2285</b> | 2596.4232        | 1298.7153        | 2595.4392        | 1298.2233        | 24 |
| 5  | 546.2956         | 273.6514        |                |                  | <b>528.2850</b>  | 264.6462         | T    | 2500.3657 | <b>1250.6865</b> | 2483.3392        | 1242.1732        | 2482.3552        | 1241.6812        | 23 |
| 6  | 675.3382         | 338.1727        |                |                  | 657.3276         | 329.1675         | E    | 2399.3181 | <b>1200.1627</b> | 2382.2915        | 1191.6494        | 2381.3075        | 1191.1574        | 22 |
| 7  | 774.4066         | 387.7069        |                |                  | 756.3960         | 378.7017         | V    | 2270.2755 | <b>1135.6414</b> | 2253.2489        | 1127.1281        | 2252.2649        | 1126.6361        | 21 |
| 8  | <b>903.4492</b>  | 452.2282        |                |                  | 885.4386         | 443.2230         | E    | 2171.2070 | <b>1086.1072</b> | 2154.1805        | <b>1077.5939</b> | 2153.1965        | <b>1077.1019</b> | 20 |
| 9  | 1004.4969        | 502.7521        |                |                  | 986.4863         | 493.7468         | T    | 2042.1645 | <b>1021.5859</b> | 2025.1379        | 1013.0726        | 2024.1539        | 1012.5806        | 19 |
| 10 | 1167.5602        | 584.2837        |                |                  | 1149.5496        | 575.2785         | Y    | 1941.1168 | 971.0620         | 1924.0902        | 962.5488         | 1923.1062        | 962.0567         | 18 |
| 11 | 1266.6286        | <b>633.8179</b> |                |                  | 1248.6181        | 624.8127         | V    | 1778.0534 | <b>889.5304</b>  | 1761.0269        | <b>881.0171</b>  | 1760.0429        | <b>880.5251</b>  | 17 |
| 12 | 1379.7127        | 690.3600        |                |                  | 1361.7021        | 681.3547         | L    | 1678.9850 | <b>839.9962</b>  | <b>1661.9585</b> | 831.4829         | <b>1660.9745</b> | 830.9909         | 16 |
| 13 | 1466.7447        | 733.8760        |                |                  | 1448.7341        | 724.8707         | S    | 1565.9010 | <b>783.4541</b>  | 1548.8744        | 774.9408         | 1547.8904        | 774.4488         | 15 |
| 14 | <b>1579.8288</b> | 790.4180        |                |                  | <b>1561.8182</b> | 781.4127         | I    | 1478.8689 | <b>739.9381</b>  | 1461.8424        | 731.4248         | 1460.8584        | 730.9328         | 14 |
| 15 | 1678.8972        | <b>839.9522</b> |                |                  | <b>1660.8866</b> | 830.9469         | V    | 1365.7849 | <b>683.3961</b>  | 1348.7583        | 674.8828         | 1347.7743        | 674.3908         | 13 |
| 16 | 1775.9500        | 888.4786        |                |                  | 1757.9394        | 879.4733         | P    | 1266.7165 | <b>633.8619</b>  | 1249.6899        | 625.3486         | 1248.7059        | 624.8566         | 12 |
| 17 | 1862.9820        | 931.9946        |                |                  | 1844.9714        | 922.9893         | S    | 1169.6637 | 585.3355         | 1152.6371        | 576.8222         | 1151.6531        | 576.3302         | 11 |
| 18 | 1920.0034        | 960.5054        |                |                  | 1901.9929        | 951.5001         | G    | 1082.6317 | 541.8195         | 1065.6051        | 533.3062         | 1064.6211        | 532.8142         | 10 |
| 19 | 2017.0562        | 1009.0317       |                |                  | 1999.0456        | 1000.0265        | P    | 1025.6102 | 513.3087         | 1008.5837        | 504.7955         | 1007.5996        | 504.3035         | 9  |
| 20 | 2130.1403        | 1065.5738       |                |                  | 2112.1297        | 1056.5685        | L    | 928.5574  | 464.7824         | 911.5309         | 456.2691         | 910.5469         | 455.7771         | 8  |
| 21 | 2258.2352        | 1129.6213       | 2241.2087      | 1121.1080        | 2240.2247        | 1120.6160        | K    | 815.4734  | 408.2403         | 798.4468         | 399.7271         | 797.4628         | 399.2350         | 7  |
| 22 | 2329.2723        | 1165.1398       | 2312.2458      | 1156.6265        | 2311.2618        | 1156.1345        | A    | 687.3784  | 344.1928         | 670.3519         | 335.6796         | 669.3679         | 335.1876         | 6  |
| 23 | 2458.3149        | 1229.6611       | 2441.2884      | 1221.1478        | 2440.3044        | 1220.6558        | E    | 616.3413  | 308.6743         | 599.3148         | 300.1610         | 598.3307         | 299.6690         | 5  |
| 24 | 2571.3990        | 1286.2031       | 2554.3725      | 1277.6899        | 2553.3884        | 1277.1979        | I    | 487.2987  | 244.1530         | 470.2722         | 235.6397         |                  |                  | 4  |
| 25 | 2642.4361        | 1321.7217       | 2625.4096      | 1313.2084        | 2624.4256        | 1312.7164        | A    | 374.2146  | 187.6110         | 357.1881         | 179.0977         |                  |                  | 3  |
| 26 | 2770.4947        | 1385.7510       | 2753.4681      | 1377.2377        | 2752.4841        | 1376.7457        | Q    | 303.1775  | 152.0924         | 286.1510         | 143.5791         |                  |                  | 2  |
| 27 |                  |                 |                |                  |                  |                  | R    | 175.1190  | 88.0631          | 158.0924         | 79.5498          |                  |                  | 1  |



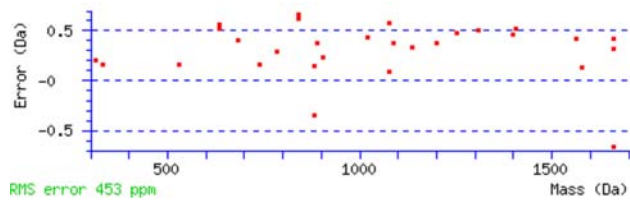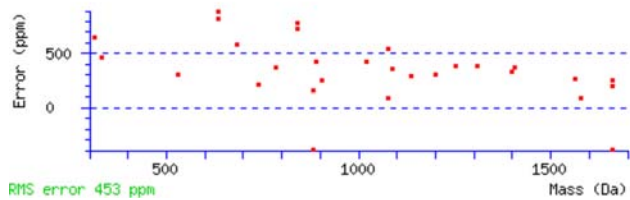

NCBI BLAST search of [MSLLTEVETYVLSIVPSGPLKAEIAQR](#)  
 (Parameters: blastp, nr protein database, expect=20000, no filter, PAM30)  
 Other BLAST [web gateways](#)

**All matches to this query**

| Score | Mr(calc): | Delta   | Sequence                                     |
|-------|-----------|---------|----------------------------------------------|
| 85.6  | 2943.5991 | 0.0000  | <a href="#">MSLLTEVETYVLSIVPSGPLKAEIAQR</a>  |
| 19.5  | 2943.5655 | 0.0336  | <a href="#">GSPVLADSAGRVRILSGGRQLQISVAEK</a> |
| 8.3   | 2943.6301 | -0.0310 | <a href="#">RMLQQQEQLRALQGRQAALLALQHK</a>    |
| 6.8   | 2943.5948 | 0.0042  | <a href="#">HVLILLENLYLLVPPTMNPVYGVK</a>     |
| 6.6   | 2943.5601 | 0.0389  | <a href="#">NKLMSLSYSLVTPMLNPFIYTLRNK</a>    |
| 6.6   | 2943.5601 | 0.0389  | <a href="#">NKLMSLSYSLVTPMLNPFIYTLRNK</a>    |
| 5.9   | 2943.5892 | 0.0099  | <a href="#">AIALVGAVLQNSKVVDVFIMQGSVPWRK</a> |
| 5.1   | 2943.6103 | -0.0112 | <a href="#">LTVQTKFMELLEPLNERKQNLLASK</a>    |
| 4.6   | 2943.5892 | 0.0099  | <a href="#">AIALVGAVLQNSKVVDVFIMQGSVPWRK</a> |
| 4.6   | 2943.5826 | 0.0164  | <a href="#">AALKWADGKMIKHEVDMQVLHLLGPK</a>   |

**Mascot:** <http://www.matrixscience.com/>



**MASCOT SCIENCE Mascot Search Results**

**Peptide View**

MS/MS Fragmentation of **MSLLTEVETYVLSIVPSGPLKAEIAQR**  
 Found in **MI**, Predicted protein of Fodor Group RG strain of A/WSN/33

Match to Query 3694: 2943.608604 from(982.210144,3+) intensity(58529.6000)  
 Title: B110905\_011.06190.06190.3  
 Data file B110905\_011.mgf.mascot

Click mouse within plot area to zoom in by factor of two about that point

Or, Plot from  to  Da

Label all possible matches  Label matches used for scoring

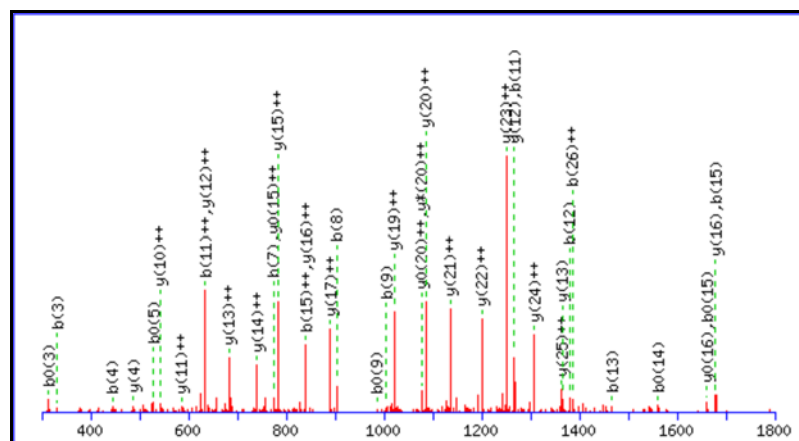

Monoisotopic mass of neutral peptide Mr(calc): 2943.5991  
 Fixed modifications: Carbamidomethyl (C) (apply to specified residues or termini only)  
 Ions Score: 92 Expect: 8.4e-09  
 Matches : 40/262 fragment ions using 57 most intense peaks ([help](#))

| #  | b                | b <sup>++</sup>  | b*        | b <sup>*++</sup> | b <sup>0</sup>   | b <sup>0++</sup> | Seq. | y                | y <sup>++</sup>  | y*        | y <sup>*++</sup> | y <sup>0</sup>   | y <sup>0++</sup> | #  |
|----|------------------|------------------|-----------|------------------|------------------|------------------|------|------------------|------------------|-----------|------------------|------------------|------------------|----|
| 1  | 132.0478         | 66.5275          |           |                  |                  |                  | M    |                  |                  |           |                  |                  |                  | 27 |
| 2  | 219.0798         | 110.0435         |           |                  | 201.0692         | 101.0382         | S    | 2813.5659        | 1407.2866        | 2796.5393 | 1398.7733        | 2795.5553        | 1398.2813        | 26 |
| 3  | <b>332.1639</b>  | 166.5856         |           |                  | <b>314.1533</b>  | 157.5803         | L    | 2726.5339        | <b>1363.7706</b> | 2709.5073 | 1355.2573        | 2708.5233        | 1354.7653        | 25 |
| 4  | <b>445.2479</b>  | 223.1276         |           |                  | 427.2374         | 214.1223         | L    | 2613.4498        | <b>1307.2285</b> | 2596.4232 | 1298.7153        | 2595.4392        | 1298.2233        | 24 |
| 5  | 546.2956         | 273.6514         |           |                  | <b>528.2850</b>  | 264.6462         | T    | 2500.3657        | <b>1250.6865</b> | 2483.3392 | 1242.1732        | 2482.3552        | 1241.6812        | 23 |
| 6  | 675.3382         | 338.1727         |           |                  | 657.3276         | 329.1675         | E    | 2399.3181        | <b>1200.1627</b> | 2382.2915 | 1191.6494        | 2381.3075        | 1191.1574        | 22 |
| 7  | <b>774.4066</b>  | 387.7069         |           |                  | 756.3960         | 378.7017         | V    | 2270.2755        | <b>1135.6414</b> | 2253.2489 | 1127.1281        | 2252.2649        | 1126.6361        | 21 |
| 8  | <b>903.4492</b>  | 452.2282         |           |                  | 885.4386         | 443.2230         | E    | 2171.2070        | <b>1086.1072</b> | 2154.1805 | <b>1077.5939</b> | 2153.1965        | <b>1077.1019</b> | 20 |
| 9  | <b>1004.4969</b> | 502.7521         |           |                  | <b>986.4863</b>  | 493.7468         | T    | 2042.1645        | <b>1021.5859</b> | 2025.1379 | 1013.0726        | 2024.1539        | 1012.5806        | 19 |
| 10 | 1167.5602        | 584.2837         |           |                  | 1149.5496        | 575.2785         | Y    | 1941.1168        | 971.0620         | 1924.0902 | 962.5488         | 1923.1062        | 962.0567         | 18 |
| 11 | <b>1266.6286</b> | <b>633.8179</b>  |           |                  | 1248.6181        | 624.8127         | V    | 1778.0534        | <b>889.5304</b>  | 1761.0269 | 881.0171         | 1760.0429        | 880.5251         | 17 |
| 12 | <b>1379.7127</b> | 690.3600         |           |                  | 1361.7021        | 681.3547         | L    | <b>1678.9850</b> | <b>839.9962</b>  | 1661.9585 | 831.4829         | <b>1660.9745</b> | 830.9909         | 16 |
| 13 | <b>1466.7447</b> | 733.8760         |           |                  | 1448.7341        | 724.8707         | S    | 1565.9010        | <b>783.4541</b>  | 1548.8744 | 774.9408         | 1547.8904        | <b>774.4488</b>  | 15 |
| 14 | 1579.8288        | 790.4180         |           |                  | <b>1561.8182</b> | 781.4127         | I    | 1478.8689        | <b>739.9381</b>  | 1461.8424 | 731.4248         | 1460.8584        | 730.9328         | 14 |
| 15 | <b>1678.8972</b> | <b>839.9522</b>  |           |                  | <b>1660.8866</b> | 830.9469         | V    | <b>1365.7849</b> | <b>683.3961</b>  | 1348.7583 | 674.8828         | 1347.7743        | 674.3908         | 13 |
| 16 | 1775.9500        | 888.4786         |           |                  | 1757.9394        | 879.4733         | P    | <b>1266.7165</b> | <b>633.8619</b>  | 1249.6899 | 625.3486         | 1248.7059        | 624.8566         | 12 |
| 17 | 1862.9820        | 931.9946         |           |                  | 1844.9714        | 922.9893         | S    | 1169.6637        | <b>585.3355</b>  | 1152.6371 | 576.8222         | 1151.6531        | 576.3302         | 11 |
| 18 | 1920.0034        | 960.5054         |           |                  | 1901.9929        | 951.5001         | G    | 1082.6317        | <b>541.8195</b>  | 1065.6051 | 533.3062         | 1064.6211        | 532.8142         | 10 |
| 19 | 2017.0562        | 1009.0317        |           |                  | 1999.0456        | 1000.0265        | P    | 1025.6102        | 513.3087         | 1008.5837 | 504.7955         | 1007.5996        | 504.3035         | 9  |
| 20 | 2130.1403        | 1065.5738        |           |                  | 2112.1297        | 1056.5685        | L    | 928.5574         | 464.7824         | 911.5309  | 456.2691         | 910.5469         | 455.7771         | 8  |
| 21 | 2258.2352        | 1129.6213        | 2241.2087 | 1121.1080        | 2240.2247        | 1120.6160        | K    | 815.4734         | 408.2403         | 798.4468  | 399.7271         | 797.4628         | 399.2350         | 7  |
| 22 | 2329.2723        | 1165.1398        | 2312.2458 | 1156.6265        | 2311.2618        | 1156.1345        | A    | 687.3784         | 344.1928         | 670.3519  | 335.6796         | 669.3679         | 335.1876         | 6  |
| 23 | 2458.3149        | 1229.6611        | 2441.2884 | 1221.1478        | 2440.3044        | 1220.6558        | E    | 616.3413         | 308.6743         | 599.3148  | 300.1610         | 598.3307         | 299.6690         | 5  |
| 24 | 2571.3990        | 1286.2031        | 2554.3725 | 1277.6899        | 2553.3884        | 1277.1979        | I    | <b>487.2987</b>  | 244.1530         | 470.2722  | 235.6397         |                  |                  | 4  |
| 25 | 2642.4361        | 1321.7217        | 2625.4096 | 1313.2084        | 2624.4256        | 1312.7164        | A    | 374.2146         | 187.6110         | 357.1881  | 179.0977         |                  |                  | 3  |
| 26 | 2770.4947        | <b>1385.7510</b> | 2753.4681 | 1377.2377        | 2752.4841        | 1376.7457        | Q    | 303.1775         | 152.0924         | 286.1510  | 143.5791         |                  |                  | 2  |
| 27 |                  |                  |           |                  |                  |                  | R    | 175.1190         | 88.0631          | 158.0924  | 79.5498          |                  |                  | 1  |

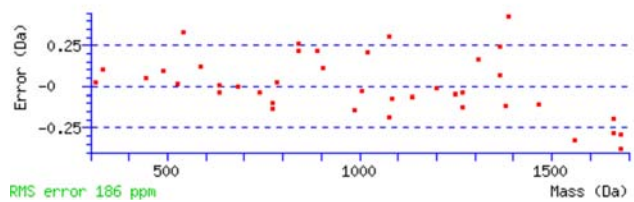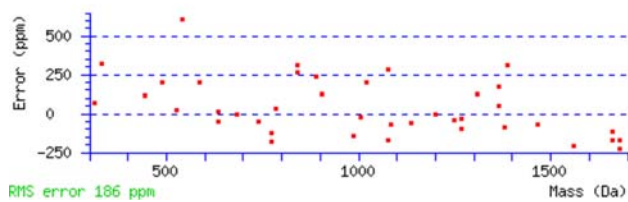

NCBI BLAST search of [MSLLTEVETYVLSIVPSGPLKAEIAQR](#)

(Parameters: blastp, nr protein database, expect=20000, no filter, PAM30)

Other BLAST [web gateways](#)

**All matches to this query**

| Score | Mr(calc): | Delta   | Sequence                                                           |
|-------|-----------|---------|--------------------------------------------------------------------|
| 92.2  | 2943.5991 | 0.0095  | <a href="#">MSLLTEVETYVLSIVPSGPLKAEIAQR</a>                        |
| 5.7   | 2943.5601 | 0.0485  | <a href="#">NKLMSLSYSLVTPMLNPFITYTLRNK</a>                         |
| 4.5   | 2941.5695 | 2.0391  | <a href="#">KPGHIRCLVPQNKGISFLAGELSDNK</a>                         |
| 3.3   | 2943.6099 | -0.0013 | <a href="#">LNVSPPPSSPLPPPPLSPLPPLRRNK</a>                         |
| 2.2   | 2941.5490 | 2.0596  | <a href="#">QSHRYEYSLLVLFFFINPIAESR</a>                            |
| 1.7   | 2941.6188 | 1.9898  | <a href="#">MGPRTL L L L L L S G V L V L T E T R A G S H S L K</a> |
| 1.6   | 2943.6586 | -0.0500 | <a href="#">SLLIFYVLNSSQTLHNKILWSVLR</a>                           |
| 1.3   | 2943.6586 | -0.0500 | <a href="#">SLLIFYVLNSSQTLHNKILWSVLR</a>                           |
| 1.2   | 2941.6307 | 1.9779  | <a href="#">LQVLSLGFPGARILGALPNFPTLAAGLR</a>                       |
| 1.2   | 2941.6543 | 1.9543  | <a href="#">KAIFLDMLGVRPFGFNEFLILLFLK</a>                          |

Mascot: <http://www.matrixscience.com/>

# MASCOT SCIENCE Mascot Search Results

## Peptide View

MS/MS Fragmentation of **SLLTEVETYVLSIVPSGPLK**  
 Found in **M1**

Match to Query 4414: 2186.213164 from(1094.113858,2+)

Title: Elution from: 106.897 to 106.897 period: 0 experiment: 1 cycles: 1 precIntensity: 37516348.0 FinneganScanNumber: 8428 MStype: enumsNormalMS rawFile: B110210\_012.RAW  
 Data file file1\_B110210\_012.mgf

Click mouse within plot area to zoom in by factor of two about that point

Or, Plot from  to  Da

Label all possible matches  Label matches used for scoring

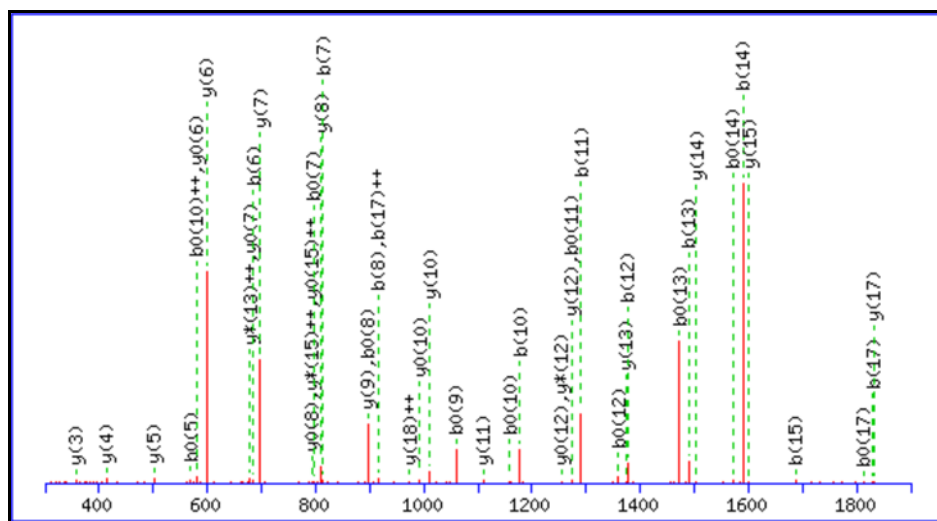

Monoisotopic mass of neutral peptide Mr(calc): 2186.2086

Fixed modifications: Carbamidomethyl (C) (apply to specified residues or termini only)

Variable modifications:

N-term : Acetyl (Protein N-term)

Ions Score: 122 Expect: 7.1e-11

Matches : 46/182 fragment ions using 46 most intense peaks ([help](#))

| #  | b         | b <sup>++</sup> | b <sup>0</sup> | b <sup>0++</sup> | Seq. | y         | y <sup>++</sup> | y <sup>*</sup> | y <sup>*++</sup> | y <sup>0</sup> | y <sup>0++</sup> | #  |
|----|-----------|-----------------|----------------|------------------|------|-----------|-----------------|----------------|------------------|----------------|------------------|----|
| 1  | 130.0499  | 65.5286         | 112.0393       | 56.5233          | S    |           |                 |                |                  |                |                  | 20 |
| 2  | 243.1339  | 122.0706        | 225.1234       | 113.0653         | L    | 2058.1733 | 1029.5903       | 2041.1467      | 1021.0770        | 2040.1627      | 1020.5850        | 19 |
| 3  | 356.2180  | 178.6126        | 338.2074       | 169.6074         | L    | 1945.0892 | 973.0482        | 1928.0627      | 964.5350         | 1927.0787      | 964.0430         | 18 |
| 4  | 457.2657  | 229.1365        | 439.2551       | 220.1312         | T    | 1832.0052 | 916.5062        | 1814.9786      | 907.9929         | 1813.9946      | 907.5009         | 17 |
| 5  | 586.3083  | 293.6578        | 568.2977       | 284.6525         | E    | 1730.9575 | 865.9824        | 1713.9309      | 857.4691         | 1712.9469      | 856.9771         | 16 |
| 6  | 685.3767  | 343.1920        | 667.3661       | 334.1867         | V    | 1601.9149 | 801.4611        | 1584.8883      | 792.9478         | 1583.9043      | 792.4558         | 15 |
| 7  | 814.4193  | 407.7133        | 796.4087       | 398.7080         | E    | 1502.8465 | 751.9269        | 1485.8199      | 743.4136         | 1484.8359      | 742.9216         | 14 |
| 8  | 915.4670  | 458.2371        | 897.4564       | 449.2318         | T    | 1373.8039 | 687.4056        | 1356.7773      | 678.8923         | 1355.7933      | 678.4003         | 13 |
| 9  | 1078.5303 | 539.7688        | 1060.5197      | 530.7635         | Y    | 1272.7562 | 636.8817        | 1255.7297      | 628.3685         | 1254.7456      | 627.8765         | 12 |
| 10 | 1177.5987 | 589.3030        | 1159.5881      | 580.2977         | V    | 1109.6929 | 555.3501        | 1092.6663      | 546.8368         | 1091.6823      | 546.3448         | 11 |
| 11 | 1290.6828 | 645.8450        | 1272.6722      | 636.8397         | L    | 1010.6245 | 505.8159        | 993.5979       | 497.3026         | 992.6139       | 496.8106         | 10 |
| 12 | 1377.7148 | 689.3610        | 1359.7042      | 680.3558         | S    | 897.5404  | 449.2738        | 880.5138       | 440.7606         | 879.5298       | 440.2686         | 9  |
| 13 | 1490.7989 | 745.9031        | 1472.7883      | 736.8978         | I    | 810.5084  | 405.7578        | 793.4818       | 397.2445         | 792.4978       | 396.7525         | 8  |
| 14 | 1589.8673 | 795.4373        | 1571.8567      | 786.4320         | V    | 697.4243  | 349.2158        | 680.3978       | 340.7025         | 679.4137       | 340.2105         | 7  |
| 15 | 1686.9200 | 843.9637        | 1668.9095      | 834.9584         | P    | 598.3559  | 299.6816        | 581.3293       | 291.1683         | 580.3453       | 290.6763         | 6  |
| 16 | 1773.9521 | 887.4797        | 1755.9415      | 878.4744         | S    | 501.3031  | 251.1552        | 484.2766       | 242.6419         | 483.2926       | 242.1499         | 5  |
| 17 | 1830.9735 | 915.9904        | 1812.9630      | 906.9851         | G    | 414.2711  | 207.6392        | 397.2445       | 199.1259         |                |                  | 4  |

|    |           |           |           |           |   |          |          |          |          |  |  |   |
|----|-----------|-----------|-----------|-----------|---|----------|----------|----------|----------|--|--|---|
| 18 | 1928.0263 | 964.5168  | 1910.0157 | 955.5115  | P | 357.2496 | 179.1285 | 340.2231 | 170.6152 |  |  | 3 |
| 19 | 2041.1104 | 1021.0588 | 2023.0998 | 1012.0535 | L | 260.1969 | 130.6021 | 243.1703 | 122.0888 |  |  | 2 |
| 20 |           |           |           |           | K | 147.1128 | 74.0600  | 130.0863 | 65.5468  |  |  | 1 |

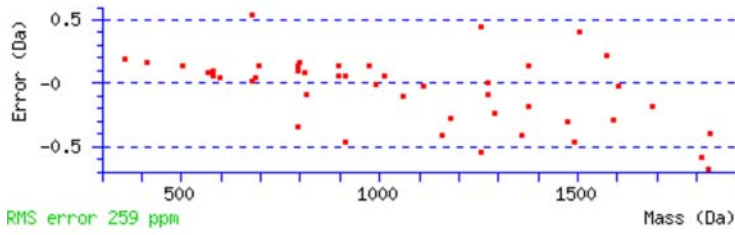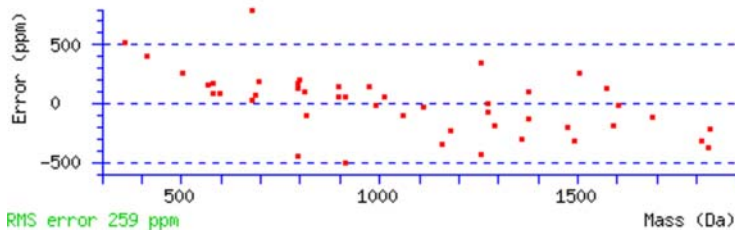

NCBI **BLAST** search of [SLLTEVETYVLSIVPSGPLK](#)  
 (Parameters: blastp, nr protein database, expect=20000, no filter, PAM30)  
 Other BLAST [web gateways](#)

**All matches to this query**

| Score | Mr(calc): | Delta   | Sequence                             |
|-------|-----------|---------|--------------------------------------|
| 122.4 | 2186.2086 | 0.0046  | <a href="#">SLLTEVETYVLSIVPSGPLK</a> |
| 25.6  | 2186.1881 | 0.0250  | <a href="#">RSLITIENHLVTLKNFCK</a>   |
| 17.2  | 2186.2205 | -0.0073 | <a href="#">GGNKILARSLMTQTLEAVKR</a> |
| 13.7  | 2186.2205 | -0.0073 | <a href="#">GGNKILARSLMTQTLEAVKR</a> |
| 11.8  | 2186.1993 | 0.0138  | <a href="#">SLRPQNQIQKMVRSYIPK</a>   |
| 8.8   | 2186.1993 | 0.0138  | <a href="#">SLRPQNQIQKMVRSYIPK</a>   |
| 7.4   | 2186.1919 | 0.0212  | <a href="#">AERLRAELLDLNRGGFSIR</a>  |
| 6.5   | 2186.1752 | 0.0380  | <a href="#">IYSPHVLNLTIDLPGITK</a>   |
| 6.2   | 2186.1752 | 0.0380  | <a href="#">IYSPHVLNLTIDLPGITK</a>   |
| 5.4   | 2186.2017 | 0.0115  | <a href="#">ASVVSKLFFSWTRPILKK</a>   |

**Mascot:** <http://www.matrixscience.com/>

# MASCOT SCIENCE Mascot Search Results

## Peptide View

MS/MS Fragmentation of **SLLTEVETYVLSIVPSGPLKAEIAQR**  
 Found in **M1**

Match to Query 6270: 2854.574656 from(1428.294604,2+)  
 Title: Elution from: 104.552 to 104.552 period: 0 experiment: 1 cycles: 1 precIntensity: 65671.0 FinneganScanNumber: 8256 MStype:  
 enumsNormalMS rawFile: B110210\_012.RAW  
 Data file file1\_B110210\_012.mgf

Click mouse within plot area to zoom in by factor of two about that point

Or, Plot from  to  Da

Label all possible matches  Label matches used for scoring

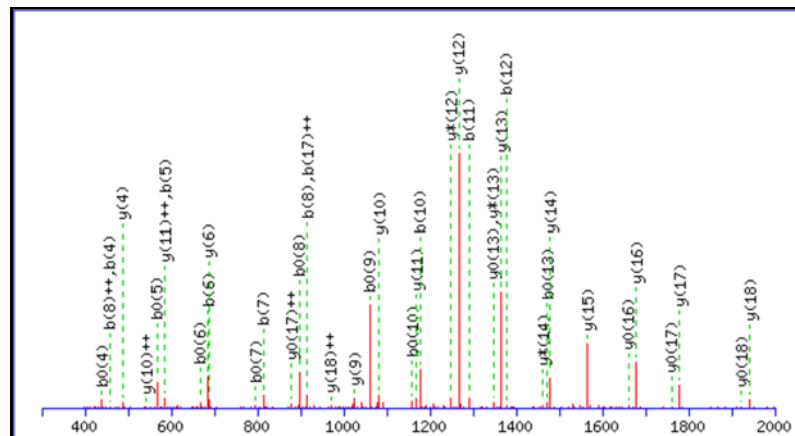

Monoisotopic mass of neutral peptide Mr(calc): 2854.5691  
 Fixed modifications: Carbamidomethyl (C) (apply to specified residues or termini only)  
 Variable modifications: Acetyl (Protein N-term)  
 N-term : Acetyl (Protein N-term)  
 Ions Score: 85 Expect: 5.9e-08  
 Matches : 41/254 fragment ions using 49 most intense peaks ([help](#))

| #  | b                | b <sup>++</sup> | b*        | b <sup>*++</sup> | b <sup>0</sup>   | b <sup>0++</sup> | Seq. | y                | y <sup>++</sup> | y*               | y <sup>*++</sup> | y <sup>0</sup>   | y <sup>0++</sup> | #  |
|----|------------------|-----------------|-----------|------------------|------------------|------------------|------|------------------|-----------------|------------------|------------------|------------------|------------------|----|
| 1  | 130.0499         | 65.5286         |           |                  | 112.0393         | 56.5233          | S    |                  |                 |                  |                  |                  |                  | 26 |
| 2  | 243.1339         | 122.0706        |           |                  | 225.1234         | 113.0653         | L    | 2726.5339        | 1363.7706       | 2709.5073        | 1355.2573        | 2708.5233        | 1354.7653        | 25 |
| 3  | 356.2180         | 178.6126        |           |                  | 338.2074         | 169.6074         | L    | 2613.4498        | 1307.2285       | 2596.4232        | 1298.7153        | 2595.4392        | 1298.2233        | 24 |
| 4  | <b>457.2657</b>  | 229.1365        |           |                  | <b>439.2551</b>  | 220.1312         | T    | 2500.3657        | 1250.6865       | 2483.3392        | 1242.1732        | 2482.3552        | 1241.6812        | 23 |
| 5  | <b>586.3083</b>  | 293.6578        |           |                  | <b>568.2977</b>  | 284.6525         | E    | 2399.3181        | 1200.1627       | 2382.2915        | 1191.6494        | 2381.3075        | 1191.1574        | 22 |
| 6  | <b>685.3767</b>  | 343.1920        |           |                  | <b>667.3661</b>  | 334.1867         | V    | 2270.2755        | 1135.6414       | 2253.2489        | 1127.1281        | 2252.2649        | 1126.6361        | 21 |
| 7  | <b>814.4193</b>  | 407.7133        |           |                  | <b>796.4087</b>  | 398.7080         | E    | 2171.2070        | 1086.1072       | 2154.1805        | 1077.5939        | 2153.1965        | 1077.1019        | 20 |
| 8  | <b>915.4670</b>  | <b>458.2371</b> |           |                  | <b>897.4564</b>  | 449.2318         | T    | 2042.1645        | 1021.5859       | 2025.1379        | 1013.0726        | 2024.1539        | 1012.5806        | 19 |
| 9  | 1078.5303        | 539.7688        |           |                  | <b>1060.5197</b> | 530.7635         | Y    | <b>1941.1168</b> | <b>971.0620</b> | 1924.0902        | 962.5488         | <b>1923.1062</b> | 962.0567         | 18 |
| 10 | <b>1177.5987</b> | 589.3030        |           |                  | <b>1159.5881</b> | 580.2977         | V    | <b>1778.0534</b> | 889.5304        | 1761.0269        | 881.0171         | <b>1760.0429</b> | <b>880.5251</b>  | 17 |
| 11 | <b>1290.6828</b> | 645.8450        |           |                  | 1272.6722        | 636.8397         | L    | <b>1678.9850</b> | 839.9962        | 1661.9585        | 831.4829         | <b>1660.9745</b> | 830.9909         | 16 |
| 12 | <b>1377.7148</b> | 689.3610        |           |                  | 1359.7042        | 680.3558         | S    | <b>1565.9010</b> | 783.4541        | 1548.8744        | 774.9408         | 1547.8904        | 774.4488         | 15 |
| 13 | 1490.7989        | 745.9031        |           |                  | <b>1472.7883</b> | 736.8978         | I    | <b>1478.8689</b> | 739.9381        | <b>1461.8424</b> | 731.4248         | 1460.8584        | 730.9328         | 14 |
| 14 | 1589.8673        | 795.4373        |           |                  | 1571.8567        | 786.4320         | V    | <b>1365.7849</b> | 683.3961        | <b>1348.7583</b> | 674.8828         | <b>1347.7743</b> | 674.3908         | 13 |
| 15 | 1686.9200        | 843.9637        |           |                  | 1668.9095        | 834.9584         | P    | <b>1266.7165</b> | 633.8619        | <b>1249.6899</b> | 625.3486         | 1248.7059        | 624.8566         | 12 |
| 16 | 1773.9521        | 887.4797        |           |                  | 1755.9415        | 878.4744         | S    | <b>1169.6637</b> | <b>585.3355</b> | 1152.6371        | 576.8222         | 1151.6531        | 576.3302         | 11 |
| 17 | 1830.9735        | <b>915.9904</b> |           |                  | 1812.9630        | 906.9851         | G    | <b>1082.6317</b> | <b>541.8195</b> | 1065.6051        | 533.3062         | 1064.6211        | 532.8142         | 10 |
| 18 | 1928.0263        | 964.5168        |           |                  | 1910.0157        | 955.5115         | P    | <b>1025.6102</b> | 513.3087        | 1008.5837        | 504.7955         | 1007.5996        | 504.3035         | 9  |
| 19 | 2041.1104        | 1021.0588       |           |                  | 2023.0998        | 1012.0535        | L    | 928.5574         | 464.7824        | 911.5309         | 456.2691         | 910.5469         | 455.7771         | 8  |
| 20 | 2169.2053        | 1085.1063       | 2152.1788 | 1076.5930        | 2151.1948        | 1076.1010        | K    | 815.4734         | 408.2403        | 798.4468         | 399.7271         | 797.4628         | 399.2350         | 7  |
| 21 | 2240.2424        | 1120.6249       | 2223.2159 | 1112.1116        | 2222.2319        | 1111.6196        | A    | <b>687.3784</b>  | 344.1928        | 670.3519         | 335.6796         | 669.3679         | 335.1876         | 6  |
| 22 | 2369.2850        | 1185.1461       | 2352.2585 | 1176.6329        | 2351.2745        | 1176.1409        | E    | 616.3413         | 308.6743        | 599.3148         | 300.1610         | 598.3307         | 299.6690         | 5  |
| 23 | 2482.3691        | 1241.6882       | 2465.3425 | 1233.1749        | 2464.3585        | 1232.6829        | I    | <b>487.2987</b>  | 244.1530        | 470.2722         | 235.6397         |                  |                  | 4  |
| 24 | 2553.4062        | 1277.2067       | 2536.3797 | 1268.6935        | 2535.3956        | 1268.2015        | A    | 374.2146         | 187.6110        | 357.1881         | 179.0977         |                  |                  | 3  |
| 25 | 2681.4648        | 1341.2360       | 2664.4382 | 1332.7228        | 2663.4542        | 1332.2307        | Q    | 303.1775         | 152.0924        | 286.1510         | 143.5791         |                  |                  | 2  |
| 26 |                  |                 |           |                  |                  |                  | R    | 175.1190         | 88.0631         | 158.0924         | 79.5498          |                  |                  | 1  |

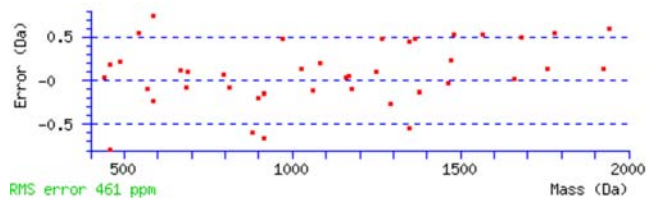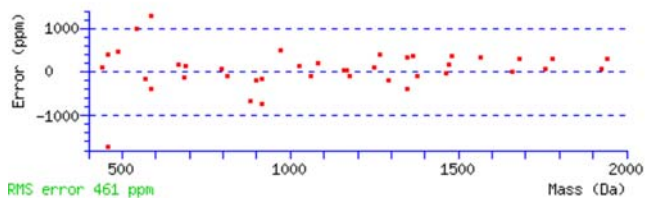

NCBI **BLAST** search of [SLLTEVETYVLSIVPSGPLKAEIAQR](#)

(Parameters: blastp, nr protein database, expect=20000, no filter, PAM30)

Other BLAST [web gateways](#)

**All matches to this query**

| Score | Mr(calc): | Delta  | Sequence                                      |
|-------|-----------|--------|-----------------------------------------------|
| 84.8  | 2854.5691 | 0.0055 | <a href="#">SLLTEVETYVLSIVPSGPLKAEIAQR</a>    |
| 7.3   | 2854.5683 | 0.0064 | <a href="#">MLAKTVPDFSLLALKILQVLFVTR</a>      |
| 7.1   | 2854.5375 | 0.0372 | <a href="#">QGLSRLGISLLGAIAGIVDQPMQNFQK</a>   |
| 7.1   | 2854.5375 | 0.0372 | <a href="#">QGLSRLGISLLGAIAGIVDQPMQNFQK</a>   |
| 3.6   | 2854.5489 | 0.0257 | <a href="#">VYMAWVAVLWLTAMAEGLVTVDPKK</a>     |
| 3.2   | 2854.5566 | 0.0181 | <a href="#">RNAPAPHPSSPLPLVSSAQAFVLVR</a>     |
| 2.7   | 2854.5189 | 0.0558 | <a href="#">KPPVPQKLTLVAPPGPNGDSSGGTQGVAK</a> |
| 2.3   | 2854.5237 | 0.0510 | <a href="#">SDRLLKVLFLVLGYTVLAGMVFVK</a>      |
| 2.2   | 2854.5189 | 0.0558 | <a href="#">KPPVPQKLTLVAPPGPNGDSSGGTQGVAK</a> |
| 2.2   | 2854.5189 | 0.0558 | <a href="#">KPPVPQKLTLVAPPGPNGDSSGGTQGVAK</a> |

**Mascot:** <http://www.matrixscience.com/>



# MASCOT SCIENCE Mascot Search Results

## Peptide View

MS/MS Fragmentation of **SLLTEVETYVLSIVPSGPLKAEIAQRLEDVFAGK**

Found in **MI**, Predicted proteins of Fodor Group RG strain of A/WSN/33

Match to Query 5312: 3714.033150 from(1239.018326,3+)

Title: Elution from: 107.990 to 107.990 period: 0 experiment: 1 cycles: 1 precIntensity: 63818.0 FinneganScanNumber: 6576 MStype:

enumsNormalMS rawFile: B110602\_036.RAW

Data file file1\_B110602\_036.mgf

Click mouse within plot area to zoom in by factor of two about that point

Or, Plot from  to  Da

Label all possible matches  Label matches used for scoring

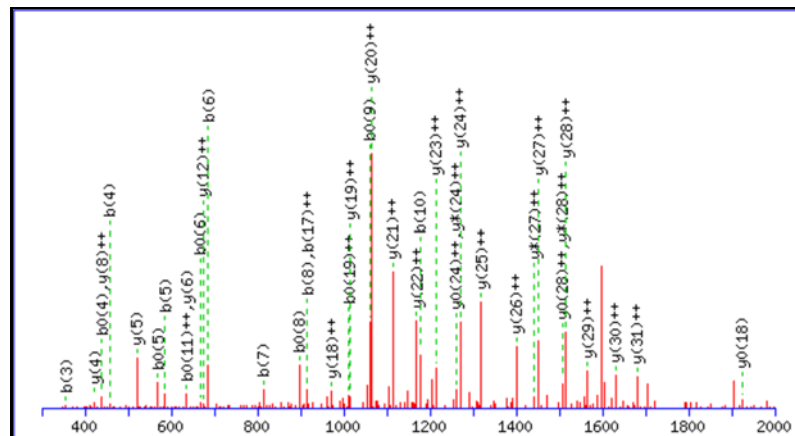

Monoisotopic mass of neutral peptide Mr(calc): 3714.0131

Fixed modifications: Carbamidomethyl (C) (apply to specified residues or termini only)

Variable modifications: Carb

N-term: Acetyl (Protein N-term)

Ions Score: 107 Expect: 4.6e-10

Matches: 40/348 fragment ions using 51 most intense peaks ([help](#))

| #  | b                | b <sup>++</sup> | b*        | b <sup>*++</sup> | b <sup>0</sup>   | b <sup>0++</sup> | Seq. | y         | y <sup>++</sup>  | y*        | y <sup>*++</sup> | y <sup>0</sup>   | y <sup>0++</sup> | #  |
|----|------------------|-----------------|-----------|------------------|------------------|------------------|------|-----------|------------------|-----------|------------------|------------------|------------------|----|
| 1  | 130.0499         | 65.5286         |           |                  | 112.0393         | 56.5233          | S    |           |                  |           |                  |                  |                  | 34 |
| 2  | 243.1339         | 122.0706        |           |                  | 225.1234         | 113.0653         | L    | 3585.9778 | 1793.4926        | 3568.9513 | 1784.9793        | 3567.9673        | 1784.4873        | 33 |
| 3  | <b>356.2180</b>  | 178.6126        |           |                  | 338.2074         | 169.6074         | L    | 3472.8938 | 1736.9505        | 3455.8672 | 1728.4372        | 3454.8832        | 1727.9452        | 32 |
| 4  | <b>457.2657</b>  | 229.1365        |           |                  | <b>439.2551</b>  | 220.1312         | T    | 3359.8097 | <b>1680.4085</b> | 3342.7832 | 1671.8952        | 3341.7991        | 1671.4032        | 31 |
| 5  | <b>586.3083</b>  | 293.6578        |           |                  | <b>568.2977</b>  | 284.6525         | E    | 3258.7620 | <b>1629.8846</b> | 3241.7355 | 1621.3714        | 3240.7515        | 1620.8794        | 30 |
| 6  | <b>685.3767</b>  | 343.1920        |           |                  | <b>667.3661</b>  | 334.1867         | V    | 3129.7194 | <b>1565.3634</b> | 3112.6929 | 1556.8501        | 3111.7089        | 1556.3581        | 29 |
| 7  | <b>814.4193</b>  | 407.7133        |           |                  | 796.4087         | 398.7080         | E    | 3030.6510 | <b>1515.8291</b> | 3013.6245 | <b>1507.3159</b> | 3012.6405        | <b>1506.8239</b> | 28 |
| 8  | <b>915.4670</b>  | 458.2371        |           |                  | <b>897.4564</b>  | 449.2318         | T    | 2901.6084 | <b>1451.3078</b> | 2884.5819 | <b>1442.7946</b> | 2883.5979        | 1442.3026        | 27 |
| 9  | 1078.5303        | 539.7688        |           |                  | <b>1060.5197</b> | 530.7635         | Y    | 2800.5607 | <b>1400.7840</b> | 2783.5342 | 1392.2707        | 2782.5502        | 1391.7787        | 26 |
| 10 | <b>1177.5987</b> | 589.3030        |           |                  | 1159.5881        | 580.2977         | V    | 2637.4974 | <b>1319.2523</b> | 2620.4709 | 1310.7391        | 2619.4869        | 1310.2471        | 25 |
| 11 | 1290.6828        | 645.8450        |           |                  | 1272.6722        | <b>636.8397</b>  | L    | 2538.4290 | <b>1269.7181</b> | 2521.4025 | <b>1261.2049</b> | 2520.4184        | <b>1260.7129</b> | 24 |
| 12 | 1377.7148        | 689.3610        |           |                  | 1359.7042        | 680.3558         | S    | 2425.3449 | <b>1213.1761</b> | 2408.3184 | 1204.6628        | 2407.3344        | 1204.1708        | 23 |
| 13 | 1490.7989        | 745.9031        |           |                  | 1472.7883        | 736.8978         | I    | 2338.3129 | <b>1169.6601</b> | 2321.2864 | 1161.1468        | 2320.3023        | 1160.6548        | 22 |
| 14 | 1589.8673        | 795.4373        |           |                  | 1571.8567        | 786.4320         | V    | 2225.2288 | <b>1113.1181</b> | 2208.2023 | 1104.6048        | 2207.2183        | 1104.1128        | 21 |
| 15 | 1686.9200        | 843.9637        |           |                  | 1668.9095        | 834.9584         | P    | 2126.1604 | <b>1063.5839</b> | 2109.1339 | 1055.0706        | 2108.1499        | 1054.5786        | 20 |
| 16 | 1773.9521        | 887.4797        |           |                  | 1755.9415        | 878.4744         | S    | 2029.1077 | <b>1015.0575</b> | 2012.0811 | 1006.5442        | 2011.0971        | 1006.0522        | 19 |
| 17 | 1830.9735        | <b>915.9904</b> |           |                  | 1812.9630        | 906.9851         | G    | 1942.0756 | <b>971.5415</b>  | 1925.0491 | 963.0282         | <b>1924.0651</b> | 962.5362         | 18 |
| 18 | 1928.0263        | 964.5168        |           |                  | 1910.0157        | 955.5115         | P    | 1885.0542 | 943.0307         | 1868.0276 | 934.5175         | 1867.0436        | 934.0254         | 17 |
| 19 | 2041.1104        | 1021.0588       |           |                  | 2023.0998        | <b>1012.0535</b> | L    | 1788.0014 | 894.5043         | 1770.9749 | 885.9911         | 1769.9908        | 885.4991         | 16 |
| 20 | 2169.2053        | 1085.1063       | 2152.1788 | 1076.5930        | 2151.1948        | 1076.1010        | K    | 1674.9173 | 837.9623         | 1657.8908 | 829.4490         | 1656.9068        | 828.9570         | 15 |
| 21 | 2240.2424        | 1120.6249       | 2223.2159 | 1112.1116        | 2222.2319        | 1111.6196        | A    | 1546.8224 | 773.9148         | 1529.7958 | 765.4016         | 1528.8118        | 764.9095         | 14 |
| 22 | 2369.2850        | 1185.1461       | 2352.2585 | 1176.6329        | 2351.2745        | 1176.1409        | E    | 1475.7853 | 738.3963         | 1458.7587 | 729.8830         | 1457.7747        | 729.3910         | 13 |
| 23 | 2482.3691        | 1241.6882       | 2465.3425 | 1233.1749        | 2464.3585        | 1232.6829        | I    | 1346.7427 | <b>673.8750</b>  | 1329.7161 | 665.3617         | 1328.7321        | 664.8697         | 12 |
| 24 | 2553.4062        | 1277.2067       | 2536.3797 | 1268.6935        | 2535.3956        | 1268.2015        | A    | 1233.6586 | 617.3329         | 1216.6321 | 608.8197         | 1215.6480        | 608.3277         | 11 |
| 25 | 2681.4648        | 1341.2360       | 2664.4382 | 1332.7228        | 2663.4542        | 1332.2307        | Q    | 1162.6215 | 581.8144         | 1145.5950 | 573.3011         | 1144.6109        | 572.8091         | 10 |
| 26 | 2837.5659        | 1419.2866       | 2820.5393 | 1410.7733        | 2819.5553        | 1410.2813        | R    | 1034.5629 | 517.7851         | 1017.5364 | 509.2718         | 1016.5524        | 508.7798         | 9  |



|    |           |           |           |           |           |           |   |          |          |          |          |          |          |   |
|----|-----------|-----------|-----------|-----------|-----------|-----------|---|----------|----------|----------|----------|----------|----------|---|
| 27 | 2950.6500 | 1475.8286 | 2933.6234 | 1467.3153 | 2932.6394 | 1466.8233 | L | 878.4618 | 439.7345 | 861.4353 | 431.2213 | 860.4512 | 430.7293 | 8 |
| 28 | 3079.6925 | 1540.3499 | 3062.6660 | 1531.8366 | 3061.6820 | 1531.3446 | E | 765.3777 | 383.1925 | 748.3512 | 374.6792 | 747.3672 | 374.1872 | 7 |
| 29 | 3194.7195 | 1597.8634 | 3177.6929 | 1589.3501 | 3176.7089 | 1588.8581 | D | 636.3352 | 318.6712 | 619.3086 | 310.1579 | 618.3246 | 309.6659 | 6 |
| 30 | 3293.7879 | 1647.3976 | 3276.7614 | 1638.8843 | 3275.7773 | 1638.3923 | V | 521.3082 | 261.1577 | 504.2817 | 252.6445 |          |          | 5 |
| 31 | 3440.8563 | 1720.9318 | 3423.8298 | 1712.4185 | 3422.8458 | 1711.9265 | F | 422.2398 | 211.6235 | 405.2132 | 203.1103 |          |          | 4 |
| 32 | 3511.8934 | 1756.4504 | 3494.8669 | 1747.9371 | 3493.8829 | 1747.4451 | A | 275.1714 | 138.0893 | 258.1448 | 129.5761 |          |          | 3 |
| 33 | 3568.9149 | 1784.9611 | 3551.8883 | 1776.4478 | 3550.9043 | 1775.9558 | G | 204.1343 | 102.5708 | 187.1077 | 94.0575  |          |          | 2 |
| 34 |           |           |           |           |           |           | K | 147.1128 | 74.0600  | 130.0863 | 65.5468  |          |          | 1 |

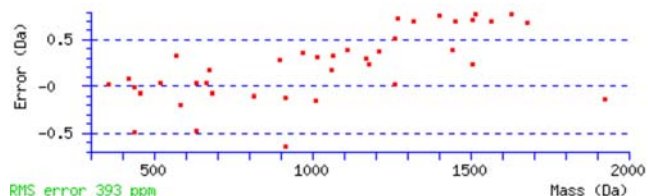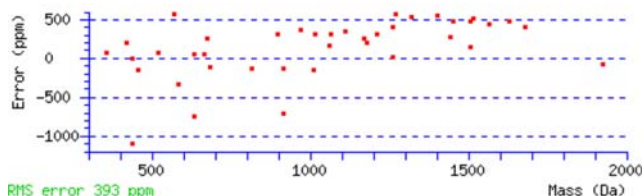

NCBI BLAST search of [SLLTEVETYVLSIVPSGPLKAEIAQRLEDVFAGK](#)

(Parameters: blastp, nr protein database, expect=20000, no filter, PAM30)

Other BLAST [web gateways](#)

All matches to this query

| Score | Mr(calc): | Delta   | Sequence                                           |
|-------|-----------|---------|----------------------------------------------------|
| 107.3 | 3714.0131 | 0.0200  | <a href="#">SLLTEVETYVLSIVPSGPLKAEIAQRLEDVFAGK</a> |
| 7.2   | 3713.9764 | 0.0567  | <a href="#">QPKYNTLYGNMSDSDITTYNSDGEDR</a>         |
| 7.2   | 3713.9764 | 0.0567  | <a href="#">QPKYNTLYGNMSDSDITTYNSDGEDR</a>         |
| 7.2   | 3713.9764 | 0.0567  | <a href="#">QPKYNTLYGNMSDSDITTYNSDGEDR</a>         |
| 6.1   | 3714.1041 | -0.0710 | <a href="#">HAVLGLYLLVFLILVGIFILAVSRPRSPDDLK</a>   |
| 4.1   | 3713.9831 | 0.0501  | <a href="#">IXDADSLAVGRFSVEGPPGETPLPLVLKLLLSR</a>  |
| 4.1   | 3714.0161 | 0.0170  | <a href="#">IXDADSLAVGRFSVEGPPGETPLPLVLKLLLSR</a>  |
| 3.9   | 3714.1041 | -0.0710 | <a href="#">HAVLGLYLLVFLILVGIFILAVSRPRSPDDLK</a>   |
| 3.9   | 3713.9797 | 0.0535  | <a href="#">TPSVVYRQRLYELLILLSPETYEGNLSVILR</a>    |
| 3.9   | 3713.9797 | 0.0535  | <a href="#">TPSVVYRQRLYELLILLSPETYEGNLSVILR</a>    |

Mascot: <http://www.matrixscience.com/>

# MASCOT SCIENCE Mascot Search Results

## Peptide View

MS/MS Fragmentation of **SLLTEVETYVLSIVPSGPLKAEIAQRLEDVFAGKNTDLEVLMEWLK**

Found in **MI**, Predicted proteins of Fodor Group RG strain of A/WSN/33

Match to Query 5717: 5187.799036 from(1297.957035,4+)

Title: Elution from: 108.993 to 108.993 period: 0 experiment: 1 cycles: 1 precIntensity: 15909.0 FinneganScanNumber: 6633 MStype:

enumsNormalMS rawFile: B110602\_036.RAW

Data file file1\_B110602\_036.mgf

Click mouse within plot area to zoom in by factor of two about that point

Or, Plot from  to  Da

Label all possible matches  Label matches used for scoring

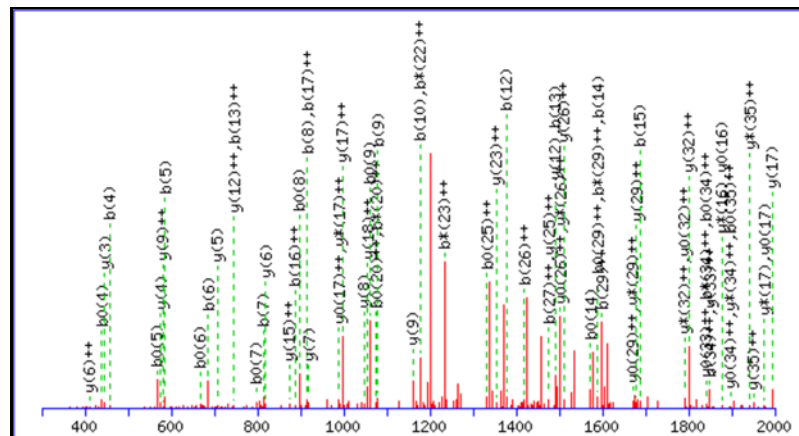

Monoisotopic mass of neutral peptide Mr(calc): 5187.7192

Fixed modifications: Carbamidomethyl (C) (apply to specified residues or termini only)

Variable modifications:

N-term : Acetyl (Protein N-term)

Q25 : Deamidated (NQ)

N35 : Deamidated (NQ)

Ions Score: 57 Expect: 9e-05

Matches : 73/496 fragment ions using 107 most intense peaks ([help](#))

| #  | b                | b <sup>++</sup> | b <sup>*</sup> | b <sup>*++</sup> | b <sup>0</sup>   | b <sup>0++</sup> | Seq. | y         | y <sup>++</sup>  | y <sup>*</sup> | y <sup>*++</sup> | y <sup>0</sup> | y <sup>0++</sup> | #  |
|----|------------------|-----------------|----------------|------------------|------------------|------------------|------|-----------|------------------|----------------|------------------|----------------|------------------|----|
| 1  | 130.0499         | 65.5286         |                |                  | 112.0393         | 56.5233          | S    |           |                  |                |                  |                |                  | 46 |
| 2  | 243.1339         | 122.0706        |                |                  | 225.1234         | 113.0653         | L    | 5059.6840 | 2530.3456        | 5042.6574      | 2521.8323        | 5041.6734      | 2521.3403        | 45 |
| 3  | 356.2180         | 178.6126        |                |                  | 338.2074         | 169.6074         | L    | 4946.5999 | 2473.8036        | 4929.5734      | 2465.2903        | 4928.5893      | 2464.7983        | 44 |
| 4  | <b>457.2657</b>  | 229.1365        |                |                  | <b>439.2551</b>  | 220.1312         | T    | 4833.5158 | 2417.2616        | 4816.4893      | 2408.7483        | 4815.5053      | 2408.2563        | 43 |
| 5  | <b>586.3083</b>  | 293.6578        |                |                  | <b>568.2977</b>  | 284.6525         | E    | 4732.4682 | 2366.7377        | 4715.4416      | 2358.2244        | 4714.4576      | 2357.7324        | 42 |
| 6  | <b>685.3767</b>  | 343.1920        |                |                  | <b>667.3661</b>  | 334.1867         | V    | 4603.4256 | 2302.2164        | 4586.3990      | 2293.7031        | 4585.4150      | 2293.2111        | 41 |
| 7  | <b>814.4193</b>  | 407.7133        |                |                  | <b>796.4087</b>  | 398.7080         | E    | 4504.3572 | 2252.6822        | 4487.3306      | 2244.1689        | 4486.3466      | 2243.6769        | 40 |
| 8  | <b>915.4670</b>  | 458.2371        |                |                  | <b>897.4564</b>  | 449.2318         | T    | 4375.3146 | 2188.1609        | 4358.2880      | 2179.6476        | 4357.3040      | 2179.1556        | 39 |
| 9  | <b>1078.5303</b> | 539.7688        |                |                  | <b>1060.5197</b> | 530.7635         | Y    | 4274.2669 | 2137.6371        | 4257.2403      | 2129.1238        | 4256.2563      | 2128.6318        | 38 |
| 10 | <b>1177.5987</b> | 589.3030        |                |                  | 1159.5881        | 580.2977         | V    | 4111.2035 | 2056.1054        | 4094.1770      | 2047.5921        | 4093.1930      | 2047.1001        | 37 |
| 11 | 1290.6828        | 645.8450        |                |                  | 1272.6722        | 636.8397         | L    | 4012.1351 | 2006.5712        | 3995.1086      | 1998.0579        | 3994.1246      | 1997.5659        | 36 |
| 12 | <b>1377.7148</b> | 689.3610        |                |                  | 1359.7042        | 680.3558         | S    | 3899.0511 | <b>1950.0292</b> | 3882.0245      | <b>1941.5159</b> | 3881.0405      | 1941.0239        | 35 |
| 13 | <b>1490.7989</b> | <b>745.9031</b> |                |                  | 1472.7883        | 736.8978         | I    | 3812.0190 | 1906.5132        | 3794.9925      | <b>1897.9999</b> | 3794.0085      | <b>1897.5079</b> | 34 |
| 14 | <b>1589.8673</b> | 795.4373        |                |                  | <b>1571.8567</b> | 786.4320         | V    | 3698.9350 | <b>1849.9711</b> | 3681.9084      | 1841.4579        | 3680.9244      | <b>1840.9658</b> | 33 |
| 15 | <b>1686.9200</b> | 843.9637        |                |                  | 1668.9095        | 834.9584         | P    | 3599.8666 | <b>1800.4369</b> | 3582.8400      | <b>1791.9236</b> | 3581.8560      | <b>1791.4316</b> | 32 |
| 16 | 1773.9521        | <b>887.4797</b> |                |                  | 1755.9415        | 878.4744         | S    | 3502.8138 | 1751.9105        | 3485.7873      | 1743.3973        | 3484.8032      | 1742.9053        | 31 |
| 17 | 1830.9735        | <b>915.9904</b> |                |                  | 1812.9630        | 906.9851         | G    | 3415.7818 | 1708.3945        | 3398.7552      | 1699.8812        | 3397.7712      | 1699.3892        | 30 |
| 18 | 1928.0263        | 964.5168        |                |                  | 1910.0157        | 955.5115         | P    | 3358.7603 | <b>1679.8838</b> | 3341.7338      | <b>1671.3705</b> | 3340.7497      | <b>1670.8785</b> | 29 |
| 19 | 2041.1104        | 1021.0588       |                |                  | 2023.0998        | 1012.0535        | L    | 3261.7075 | 1631.3574        | 3244.6810      | 1622.8441        | 3243.6970      | 1622.3521        | 28 |
| 20 | 2169.2053        | 1085.1063       | 2152.1788      | <b>1076.5930</b> | 2151.1948        | <b>1076.1010</b> | K    | 3148.6235 | 1574.8154        | 3131.5969      | 1566.3021        | 3130.6129      | 1565.8101        | 27 |
| 21 | 2240.2424        | 1120.6249       | 2223.2159      | 1112.1116        | 2222.2319        | 1111.6196        | A    | 3020.5285 | <b>1510.7679</b> | 3003.5020      | <b>1502.2546</b> | 3002.5180      | <b>1501.7626</b> | 26 |
| 22 | 2369.2850        | 1185.1461       | 2352.2585      | <b>1176.6329</b> | 2351.2745        | 1176.1409        | E    | 2949.4914 | <b>1475.2493</b> | 2932.4649      | 1466.7361        | 2931.4808      | 1466.2441        | 25 |
| 23 | 2482.3691        | 1241.6882       | 2465.3425      | <b>1233.1749</b> | 2464.3585        | 1232.6829        | I    | 2820.4488 | 1410.7280        | 2803.4223      | 1402.2148        | 2802.4382      | 1401.7228        | 24 |
| 24 | 2553.4062        | 1277.2067       | 2536.3797      | 1268.6935        | 2535.3956        | 1268.2015        | A    | 2707.3647 | <b>1354.1860</b> | 2690.3382      | 1345.6727        | 2689.3542      | 1345.1807        | 23 |
| 25 | 2682.4488        | 1341.7280       | 2665.4222      | 1333.2148        | 2664.4382        | <b>1332.7228</b> | Q    | 2636.3276 | 1318.6675        | 2619.3011      | 1310.1542        | 2618.3171      | 1309.6622        | 22 |

|    |           |           |           |           |           |           |   |           |           |           |           |           |           |    |
|----|-----------|-----------|-----------|-----------|-----------|-----------|---|-----------|-----------|-----------|-----------|-----------|-----------|----|
| 26 | 2838.5499 | 1419.7786 | 2821.5234 | 1411.2653 | 2820.5393 | 1410.7733 | R | 2507.2850 | 1254.1462 | 2490.2585 | 1245.6329 | 2489.2745 | 1245.1409 | 21 |
| 27 | 2951.6340 | 1476.3206 | 2934.6074 | 1467.8073 | 2933.6234 | 1467.3153 | L | 2351.1839 | 1176.0956 | 2334.1574 | 1167.5823 | 2333.1734 | 1167.0903 | 20 |
| 28 | 3080.6766 | 1540.8419 | 3063.6500 | 1532.3286 | 3062.6660 | 1531.8366 | E | 2238.0999 | 1119.5536 | 2221.0733 | 1111.0403 | 2220.0893 | 1110.5483 | 19 |
| 29 | 3195.7035 | 1598.3554 | 3178.6770 | 1589.8421 | 3177.6929 | 1589.3501 | D | 2109.0573 | 1055.0323 | 2092.0307 | 1046.5190 | 2091.0467 | 1046.0270 | 18 |
| 30 | 3294.7719 | 1647.8896 | 3277.7454 | 1639.3763 | 3276.7614 | 1638.8843 | V | 1994.0303 | 997.5188  | 1977.0038 | 989.0055  | 1976.0198 | 988.5135  | 17 |
| 31 | 3441.8403 | 1721.4238 | 3424.8138 | 1712.9105 | 3423.8298 | 1712.4185 | F | 1894.9619 | 947.9846  | 1877.9354 | 939.4713  | 1876.9513 | 938.9793  | 16 |
| 32 | 3512.8774 | 1756.9424 | 3495.8509 | 1748.4291 | 3494.8669 | 1747.9371 | A | 1747.8935 | 874.4504  | 1730.8670 | 865.9371  | 1729.8829 | 865.4451  | 15 |
| 33 | 3569.8989 | 1785.4531 | 3552.8724 | 1776.9398 | 3551.8883 | 1776.4478 | G | 1676.8564 | 838.9318  | 1659.8298 | 830.4186  | 1658.8458 | 829.9265  | 14 |
| 34 | 3697.9939 | 1849.5006 | 3680.9673 | 1840.9873 | 3679.9833 | 1840.4953 | K | 1619.8349 | 810.4211  | 1602.8084 | 801.9078  | 1601.8244 | 801.4158  | 13 |
| 35 | 3813.0208 | 1907.0140 | 3795.9943 | 1898.5008 | 3795.0103 | 1898.0088 | N | 1491.7400 | 746.3736  | 1474.7134 | 737.8603  | 1473.7294 | 737.3683  | 12 |
| 36 | 3914.0685 | 1957.5379 | 3897.0419 | 1949.0246 | 3896.0579 | 1948.5326 | T | 1376.7130 | 688.8601  | 1359.6865 | 680.3469  | 1358.7025 | 679.8549  | 11 |
| 37 | 4029.0954 | 2015.0514 | 4012.0689 | 2006.5381 | 4011.0849 | 2006.0461 | D | 1275.6653 | 638.3363  | 1258.6388 | 629.8230  | 1257.6548 | 629.3310  | 10 |
| 38 | 4142.1795 | 2071.5934 | 4125.1530 | 2063.0801 | 4124.1689 | 2062.5881 | L | 1160.6384 | 580.8228  | 1143.6118 | 572.3096  | 1142.6278 | 571.8176  | 9  |
| 39 | 4271.2221 | 2136.1147 | 4254.1955 | 2127.6014 | 4253.2115 | 2127.1094 | E | 1047.5543 | 524.2808  | 1030.5278 | 515.7675  | 1029.5438 | 515.2755  | 8  |
| 40 | 4370.2905 | 2185.6489 | 4353.2640 | 2177.1356 | 4352.2799 | 2176.6436 | V | 918.5117  | 459.7595  | 901.4852  | 451.2462  | 900.5012  | 450.7542  | 7  |
| 41 | 4483.3746 | 2242.1909 | 4466.3480 | 2233.6777 | 4465.3640 | 2233.1856 | L | 819.4433  | 410.2253  | 802.4168  | 401.7120  | 801.4328  | 401.2200  | 6  |
| 42 | 4614.4151 | 2307.7112 | 4597.3885 | 2299.1979 | 4596.4045 | 2298.7059 | M | 706.3593  | 353.6833  | 689.3327  | 345.1700  | 688.3487  | 344.6780  | 5  |
| 43 | 4743.4577 | 2372.2325 | 4726.4311 | 2363.7192 | 4725.4471 | 2363.2272 | E | 575.3188  | 288.1630  | 558.2922  | 279.6498  | 557.3082  | 279.1577  | 4  |
| 44 | 4929.5370 | 2465.2721 | 4912.5104 | 2456.7588 | 4911.5264 | 2456.2668 | W | 446.2762  | 223.6417  | 429.2496  | 215.1285  |           |           | 3  |
| 45 | 5042.6210 | 2521.8142 | 5025.5945 | 2513.3009 | 5024.6105 | 2512.8089 | L | 260.1969  | 130.6021  | 243.1703  | 122.0888  |           |           | 2  |
| 46 |           |           |           |           |           |           | K | 147.1128  | 74.0600   | 130.0863  | 65.5468   |           |           | 1  |

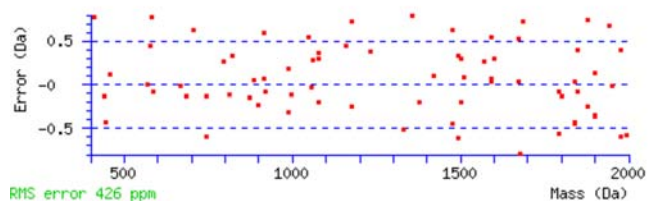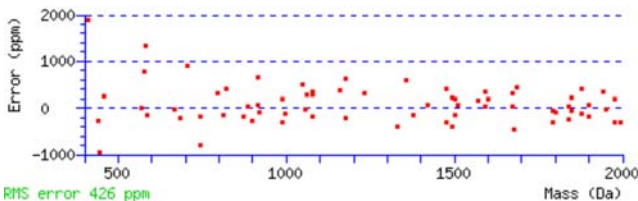

NCBI **BLAST** search of [SLLTEVETYVLSIVPSGPLKAEIAQRLEDVFAGKNTDLEVLMEWLK](#)  
 (Parameters: blastp, nr protein database, expect=20000, no filter, PAM30)  
 Other BLAST [web gateways](#)

All matches to this query

| Score | Mr(calc): | Delta   | Sequence                                                         |
|-------|-----------|---------|------------------------------------------------------------------|
| 56.8  | 5187.7192 | 0.0798  | <a href="#">SLLTEVETYVLSIVPSGPLKAEIAQRLEDVFAGKNTDLEVLMEWLK</a>   |
| 13.2  | 5187.7865 | 0.0125  | <a href="#">ASKLTQVLRDSFIGQNSSTCMIATISPGMASCENTLNTLR</a>         |
| 13.1  | 5187.7868 | 0.0123  | <a href="#">RWGLSSLSONHNSEPDSONFSQSEGRNTGPWLSSSLRNR</a>          |
| 12.8  | 5187.7111 | 0.0879  | <a href="#">ATNGSGQATSTAELLVTAETAPPNFTQRLQSMTVRQGSQVR</a>        |
| 12.3  | 5187.7694 | 0.0296  | <a href="#">NWNEGTLSAQSSESGIEELHRESGQCQMERDGSFSPFSKSR</a>        |
| 12.0  | 5187.6988 | 0.1002  | <a href="#">QGQSSHYDETRHGLSTRYSQTDROGVNSQYGQSETGETR</a>          |
| 11.5  | 5187.8549 | -0.0558 | <a href="#">QMDPLNRPNAEGSDKYICTTSDNLASVCSPSQLQDDENIDR</a>        |
| 11.5  | 5187.7608 | 0.0382  | <a href="#">EPAEPWASQAALQEDVDMSSGGSSGNETSENGSTGRDSQGSDCGDSGR</a> |
| 10.9  | 5187.7911 | 0.0079  | <a href="#">EAEQAAGEAASGDTPGSSPSSLYEEPLGQPPRFTQKLRSR</a>         |
| 10.8  | 5187.8108 | -0.0118 | <a href="#">NDKGCSLGSALLSPTSASPATSSSTVTAKTSAVVSFMSNSPLR</a>      |

Mascot: <http://www.matrixscience.com/>

# MASCOT SCIENCE Mascot Search Results

## Peptide View

MS/MS Fragmentation of **SLLTEVETPIR**

Found in **M2**, Predicted proteins of Fodor Group RG strain of A/WSN/33

Match to Query 1253: 1256.704088 from(629.359320,2+)

Title: Elution from: 32.037 to 32.037 period: 0 experiment: 1 cycles: 1 precIntensity: 1051617.0 FinneganScanNumber: 2214 MStype: enumIsNormalMS rawFile: B110602\_036.RAW

Data file file1\_B110602\_036.mgf

Click mouse within plot area to zoom in by factor of two about that point

Or, Plot from  to  Da

Label all possible matches  Label matches used for scoring

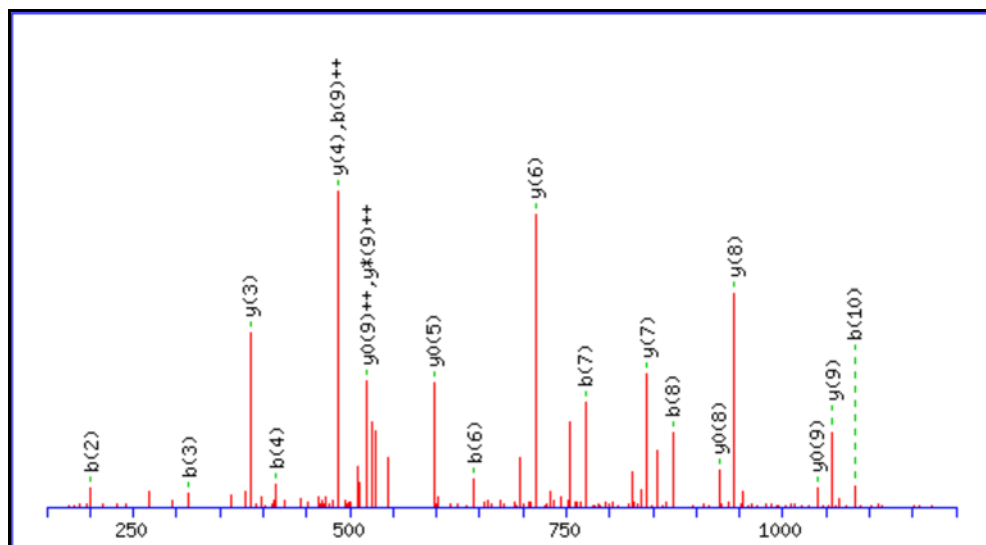

Monoisotopic mass of neutral peptide Mr(calc): 1256.6976

Fixed modifications: Carbamidomethyl (C) (apply to specified residues or termini only)

Ions Score: 65 Expect: 1.3e-05

Matches : 19/94 fragment ions using 20 most intense peaks ([help](#))

| #  | b                | b <sup>++</sup> | b <sup>0</sup> | b <sup>0++</sup> | Seq. | y                | y <sup>++</sup> | y*        | y <sup>*++</sup> | y <sup>0</sup>   | y <sup>0++</sup> | #  |
|----|------------------|-----------------|----------------|------------------|------|------------------|-----------------|-----------|------------------|------------------|------------------|----|
| 1  | 88.0393          | 44.5233         | 70.0287        | 35.5180          | S    |                  |                 |           |                  |                  |                  | 11 |
| 2  | <b>201.1234</b>  | 101.0653        | 183.1128       | 92.0600          | L    | 1170.6729        | 585.8401        | 1153.6463 | 577.3268         | 1152.6623        | 576.8348         | 10 |
| 3  | <b>314.2074</b>  | 157.6074        | 296.1969       | 148.6021         | L    | <b>1057.5888</b> | 529.2980        | 1040.5623 | <b>520.7848</b>  | <b>1039.5782</b> | <b>520.2928</b>  | 9  |
| 4  | <b>415.2551</b>  | 208.1312        | 397.2445       | 199.1259         | T    | <b>944.5047</b>  | 472.7560        | 927.4782  | 464.2427         | <b>926.4942</b>  | 463.7507         | 8  |
| 5  | 544.2977         | 272.6525        | 526.2871       | 263.6472         | E    | <b>843.4571</b>  | 422.2322        | 826.4305  | 413.7189         | 825.4465         | 413.2269         | 7  |
| 6  | <b>643.3661</b>  | 322.1867        | 625.3556       | 313.1814         | V    | <b>714.4145</b>  | 357.7109        | 697.3879  | 349.1976         | 696.4039         | 348.7056         | 6  |
| 7  | <b>772.4087</b>  | 386.7080        | 754.3981       | 377.7027         | E    | 615.3461         | 308.1767        | 598.3195  | 299.6634         | <b>597.3355</b>  | 299.1714         | 5  |
| 8  | <b>873.4564</b>  | 437.2318        | 855.4458       | 428.2266         | T    | <b>486.3035</b>  | 243.6554        | 469.2769  | 235.1421         | 468.2929         | 234.6501         | 4  |
| 9  | 970.5092         | <b>485.7582</b> | 952.4986       | 476.7529         | P    | <b>385.2558</b>  | 193.1315        | 368.2292  | 184.6183         |                  |                  | 3  |
| 10 | <b>1083.5932</b> | 542.3002        | 1065.5827      | 533.2950         | I    | 288.2030         | 144.6051        | 271.1765  | 136.0919         |                  |                  | 2  |
| 11 |                  |                 |                |                  | R    | 175.1190         | 88.0631         | 158.0924  | 79.5498          |                  |                  | 1  |

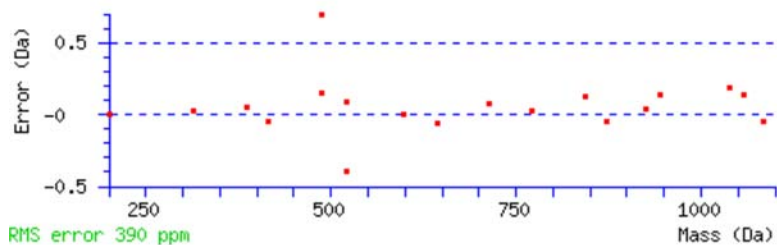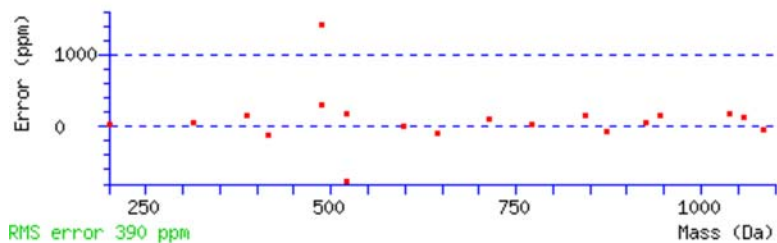

NCBI **BLAST** search of [SLLTEVETPIR](#)

(Parameters: blastp, nr protein database, expect=20000, no filter, PAM30)

Other BLAST [web gateways](#)

#### All matches to this query

| Score | Mr(calc): | Delta   | Sequence                      |
|-------|-----------|---------|-------------------------------|
| 64.8  | 1256.6976 | 0.0065  | <a href="#">SLLTEVETPIR</a>   |
| 12.0  | 1256.6949 | 0.0092  | <a href="#">LSLIGDRRGDR</a>   |
| 10.9  | 1256.6837 | 0.0204  | <a href="#">SAISEVVQRAR</a>   |
| 10.6  | 1256.6976 | 0.0065  | <a href="#">TPSVTQVTPAKK</a>  |
| 9.9   | 1256.7088 | -0.0048 | <a href="#">SLIVAGLGDGSIR</a> |
| 8.3   | 1256.6837 | 0.0204  | <a href="#">QAREERLVQK</a>    |
| 7.4   | 1256.7088 | -0.0047 | <a href="#">AEIEKLKAAQR</a>   |
| 7.4   | 1256.7281 | -0.0240 | <a href="#">TVLIFFFSKR</a>    |
| 7.4   | 1256.7088 | -0.0047 | <a href="#">TVLQLPSKSER</a>   |
| 6.7   | 1256.7088 | -0.0047 | <a href="#">LQTVALSQQIR</a>   |

Mascot: <http://www.matrixscience.com/>

# MASCOT SCIENCE Mascot Search Results

## Peptide View

MS/MS Fragmentation of **SLLTEVETPIR**

Found in **M2**, Predicted proteins of Fodor Group RG strain of A/WSN/33

Match to Query 1328: 1298.714508 from(650.364530,2+)

Title: Elution from: 48.605 to 48.605 period: 0 experiment: 1 cycles: 1 precIntensity: 999360.0 FinneganScanNumber: 3241 MStype: enumIsNormalMS rawFile: B110602\_036.RAW

Data file file1\_B110602\_036.mgf

Click mouse within plot area to zoom in by factor of two about that point

Or, Plot from  to  Da

Label all possible matches  Label matches used for scoring

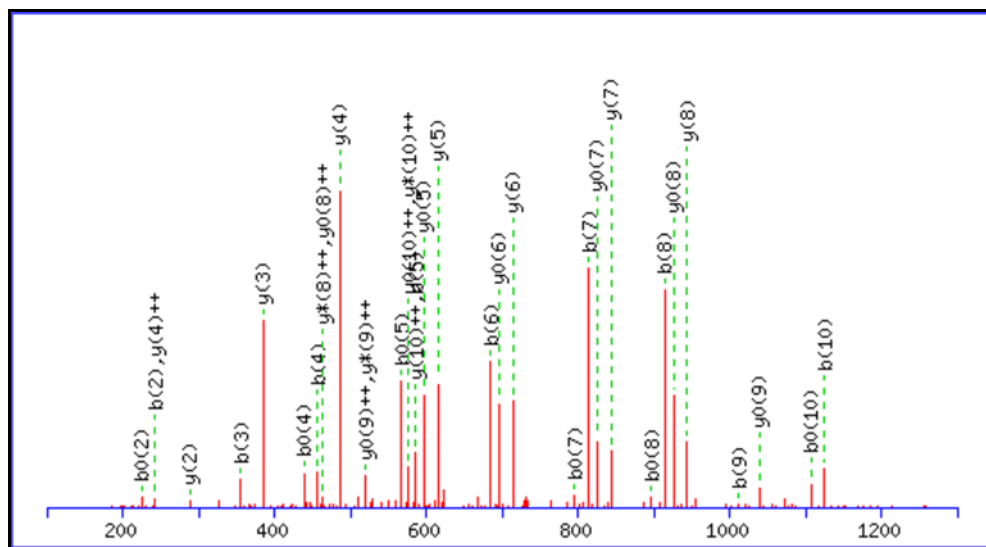

Monoisotopic mass of neutral peptide **Mr(calc):** 1298.7082

**Fixed modifications:** Carbamidomethyl (C) (apply to specified residues or termini only)

**Variable modifications:**

**N-term :** Acetyl (Protein N-term)

**Ions Score:** 70 **Expect:** 6.2e-06

**Matches :** 35/94 fragment ions using 44 most intense peaks ([help](#))

| #  | b                | b <sup>++</sup> | b <sup>0</sup>   | b <sup>0++</sup> | Seq. | y               | y <sup>++</sup> | y <sup>*</sup> | y <sup>*++</sup> | y <sup>0</sup>   | y <sup>0++</sup> | #  |
|----|------------------|-----------------|------------------|------------------|------|-----------------|-----------------|----------------|------------------|------------------|------------------|----|
| 1  | 130.0499         | 65.5286         | 112.0393         | 56.5233          | S    |                 |                 |                |                  |                  |                  | 11 |
| 2  | <b>243.1339</b>  | 122.0706        | <b>225.1234</b>  | 113.0653         | L    | 1170.6729       | <b>585.8401</b> | 1153.6463      | <b>577.3268</b>  | 1152.6623        | <b>576.8348</b>  | 10 |
| 3  | <b>356.2180</b>  | 178.6126        | 338.2074         | 169.6074         | L    | 1057.5888       | 529.2980        | 1040.5623      | <b>520.7848</b>  | <b>1039.5782</b> | <b>520.2928</b>  | 9  |
| 4  | <b>457.2657</b>  | 229.1365        | <b>439.2551</b>  | 220.1312         | T    | <b>944.5047</b> | 472.7560        | 927.4782       | <b>464.2427</b>  | <b>926.4942</b>  | <b>463.7507</b>  | 8  |
| 5  | <b>586.3083</b>  | 293.6578        | <b>568.2977</b>  | 284.6525         | E    | <b>843.4571</b> | 422.2322        | 826.4305       | 413.7189         | <b>825.4465</b>  | 413.2269         | 7  |
| 6  | <b>685.3767</b>  | 343.1920        | 667.3661         | 334.1867         | V    | <b>714.4145</b> | 357.7109        | 697.3879       | 349.1976         | <b>696.4039</b>  | 348.7056         | 6  |
| 7  | <b>814.4193</b>  | 407.7133        | <b>796.4087</b>  | 398.7080         | E    | <b>615.3461</b> | 308.1767        | 598.3195       | 299.6634         | <b>597.3355</b>  | 299.1714         | 5  |
| 8  | <b>915.4670</b>  | 458.2371        | <b>897.4564</b>  | 449.2318         | T    | <b>486.3035</b> | <b>243.6554</b> | 469.2769       | 235.1421         | 468.2929         | 234.6501         | 4  |
| 9  | <b>1012.5197</b> | 506.7635        | 994.5092         | 497.7582         | P    | <b>385.2558</b> | 193.1315        | 368.2292       | 184.6183         |                  |                  | 3  |
| 10 | <b>1125.6038</b> | 563.3055        | <b>1107.5932</b> | 554.3002         | I    | <b>288.2030</b> | 144.6051        | 271.1765       | 136.0919         |                  |                  | 2  |
| 11 |                  |                 |                  |                  | R    | 175.1190        | 88.0631         | 158.0924       | 79.5498          |                  |                  | 1  |



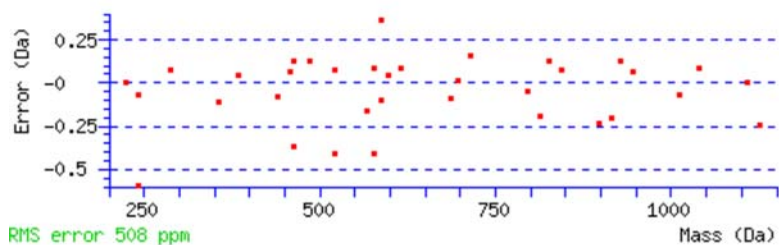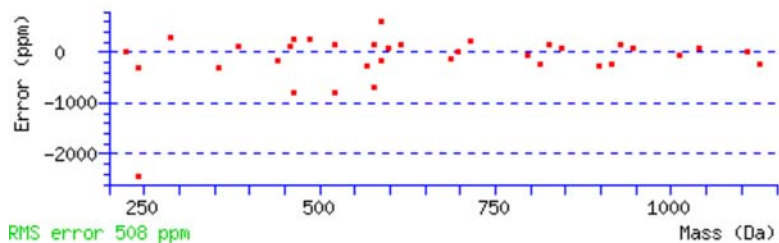

NCBI **BLAST** search of [SLLTEVETPIR](#)

(Parameters: blastp, nr protein database, expect=20000, no filter, PAM30)

Other BLAST [web gateways](#)

#### All matches to this query

| Score | Mr(calc): | Delta   | Sequence                     |
|-------|-----------|---------|------------------------------|
| 70.1  | 1298.7082 | 0.0063  | <a href="#">SLLTEVETPIR</a>  |
| 13.7  | 1298.6943 | 0.0202  | <a href="#">VVEGTPLTDGRR</a> |
| 11.5  | 1298.7234 | -0.0089 | <a href="#">FLLQVQSPPLR</a>  |
| 11.2  | 1298.7167 | -0.0022 | <a href="#">RDLGSRLQAQR</a>  |
| 8.8   | 1298.7306 | -0.0161 | <a href="#">LQGDAAVLRISR</a> |
| 7.7   | 1298.6942 | 0.0203  | <a href="#">IQENVRNAIGGK</a> |
| 7.5   | 1298.7194 | -0.0049 | <a href="#">DLASVSLKNPVR</a> |
| 7.4   | 1298.6999 | 0.0146  | <a href="#">TLIQFTVKLR</a>   |
| 7.0   | 1298.6943 | 0.0202  | <a href="#">VQEEIDRVVGR</a>  |
| 7.0   | 1298.6942 | 0.0203  | <a href="#">VQEEINRVVGR</a>  |

Mascot: <http://www.matrixscience.com/>



**MASCOT SCIENCE** Mascot Search Results

**Peptide View**

MS/MS Fragmentation of **MDPNTVSSFQVDCFLWHVR**  
 Found in **NS1**

Match to Query 5125: 2379.075384 from(1190.544968,2+)

Title: Elution from: 68.492 to 68.492 period: 0 experiment: 1 cycles: 1 precIntensity: 1018488.0 FinneganScanNumber: 5396 MStype: enumIsNormalMS rawFile: B110210\_012.RAW  
 Data file file1\_B110210\_012.mgf

Click mouse within plot area to zoom in by factor of two about that point

Or, Plot from  to  Da

Label all possible matches  Label matches used for scoring

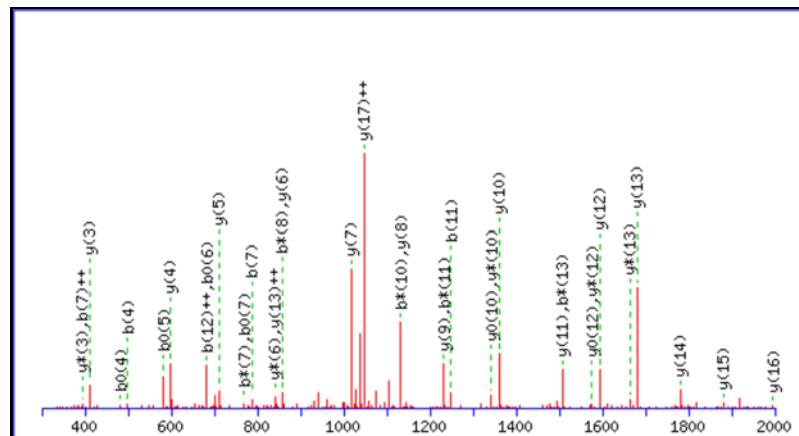

Monoisotopic mass of neutral peptide Mr(calc): 2379.0777  
 Fixed modifications: Carbamidomethyl (C) (apply to specified residues or termini only)  
 Variable modifications:  
 N-term : Acetyl (Protein N-term)  
 Ions Score: 117 Expect: 2.1e-10  
 Matches : 37/194 fragment ions using 34 most intense peaks ([help](#))

| #  | b         | b <sup>++</sup> | b*        | b <sup>*++</sup> | b <sup>0</sup> | b <sup>0++</sup> | Seq. | y         | y <sup>++</sup> | y*        | y <sup>*++</sup> | y <sup>0</sup> | y <sup>0++</sup> | #  |
|----|-----------|-----------------|-----------|------------------|----------------|------------------|------|-----------|-----------------|-----------|------------------|----------------|------------------|----|
| 1  | 174.0583  | 87.5328         |           |                  |                |                  | M    |           |                 |           |                  |                |                  | 19 |
| 2  | 289.0853  | 145.0463        |           |                  | 271.0747       | 136.0410         | D    | 2207.0338 | 1104.0206       | 2190.0073 | 1095.5073        | 2189.0233      | 1095.0153        | 18 |
| 3  | 386.1380  | 193.5727        |           |                  | 368.1275       | 184.5674         | P    | 2092.0069 | 1046.5071       | 2074.9804 | 1037.9938        | 2073.9963      | 1037.5018        | 17 |
| 4  | 500.1810  | 250.5941        | 483.1544  | 242.0808         | 482.1704       | 241.5888         | N    | 1994.9541 | 997.9807        | 1977.9276 | 989.4674         | 1976.9436      | 988.9754         | 16 |
| 5  | 601.2286  | 301.1180        | 584.2021  | 292.6047         | 583.2181       | 292.1127         | T    | 1880.9112 | 940.9592        | 1863.8847 | 932.4460         | 1862.9007      | 931.9540         | 15 |
| 6  | 700.2971  | 350.6522        | 683.2705  | 342.1389         | 682.2865       | 341.6469         | V    | 1779.8635 | 890.4354        | 1762.8370 | 881.9221         | 1761.8530      | 881.4301         | 14 |
| 7  | 787.3291  | 394.1682        | 770.3025  | 385.6549         | 769.3185       | 385.1629         | S    | 1680.7951 | 840.9012        | 1663.7686 | 832.3879         | 1662.7846      | 831.8959         | 13 |
| 8  | 874.3611  | 437.6842        | 857.3346  | 429.1709         | 856.3505       | 428.6789         | S    | 1593.7631 | 797.3852        | 1576.7365 | 788.8719         | 1575.7525      | 788.3799         | 12 |
| 9  | 1021.4295 | 511.2184        | 1004.4030 | 502.7051         | 1003.4190      | 502.2131         | F    | 1506.7311 | 753.8692        | 1489.7045 | 745.3559         | 1488.7205      | 744.8639         | 11 |
| 10 | 1149.4881 | 575.2477        | 1132.4616 | 566.7344         | 1131.4775      | 566.2424         | Q    | 1359.6627 | 680.3350        | 1342.6361 | 671.8217         | 1341.6521      | 671.3297         | 10 |
| 11 | 1248.5565 | 624.7819        | 1231.5300 | 616.2686         | 1230.5459      | 615.7766         | V    | 1231.6041 | 616.3057        | 1214.5775 | 607.7924         | 1213.5935      | 607.3004         | 9  |
| 12 | 1363.5835 | 682.2954        | 1346.5569 | 673.7821         | 1345.5729      | 673.2901         | D    | 1132.5357 | 566.7715        | 1115.5091 | 558.2582         | 1114.5251      | 557.7662         | 8  |
| 13 | 1523.6141 | 762.3107        | 1506.5876 | 753.7974         | 1505.6035      | 753.3054         | C    | 1017.5087 | 509.2580        | 1000.4822 | 500.7447         |                |                  | 7  |
| 14 | 1670.6825 | 835.8449        | 1653.6560 | 827.3316         | 1652.6720      | 826.8396         | F    | 857.4781  | 429.2427        | 840.4515  | 420.7294         |                |                  | 6  |
| 15 | 1783.7666 | 892.3869        | 1766.7400 | 883.8737         | 1765.7560      | 883.3816         | L    | 710.4097  | 355.7085        | 693.3831  | 347.1952         |                |                  | 5  |
| 16 | 1969.8459 | 985.4266        | 1952.8193 | 976.9133         | 1951.8353      | 976.4213         | W    | 597.3256  | 299.1664        | 580.2990  | 290.6532         |                |                  | 4  |
| 17 | 2106.9048 | 1053.9560       | 2089.8783 | 1045.4428        | 2088.8942      | 1044.9508        | H    | 411.2463  | 206.1268        | 394.2197  | 197.6135         |                |                  | 3  |
| 18 | 2205.9732 | 1103.4902       | 2188.9467 | 1094.9770        | 2187.9627      | 1094.4850        | V    | 274.1874  | 137.5973        | 257.1608  | 129.0840         |                |                  | 2  |
| 19 |           |                 |           |                  |                |                  | R    | 175.1190  | 88.0631         | 158.0924  | 79.5498          |                |                  | 1  |

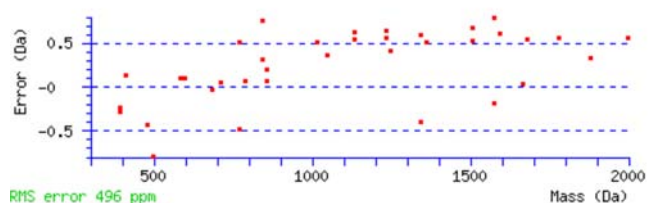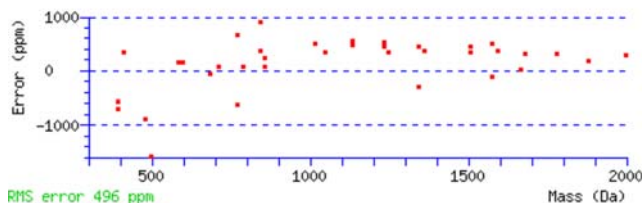

NCBI **BLAST** search of [MDPNTVSSFQVDCFLWHVR](#)  
(Parameters: blastp, nr protein database, expect=20000, no filter, PAM30)  
Other BLAST [web gateways](#)

**All matches to this query**

| Score | Mr(calc): | Delta   | Sequence                              |
|-------|-----------|---------|---------------------------------------|
| 117.3 | 2379.0777 | -0.0023 | <a href="#">MDPNTVSSFQVDCFLWHVR</a>   |
| 13.4  | 2379.0817 | -0.0063 | <a href="#">RMNLSDYLSSNGSFPLEQLK</a>  |
| 13.4  | 2379.0817 | -0.0063 | <a href="#">RMNLSDYLSSNGSFPLEQLK</a>  |
| 11.6  | 2379.0912 | -0.0159 | <a href="#">NAYGITPLFVAAQSGLEALR</a>  |
| 10.7  | 2379.0930 | -0.0176 | <a href="#">MVNPGSSSQPPPVTAGLSWKR</a> |
| 10.5  | 2379.0665 | 0.0089  | <a href="#">KMSTHVSSSPTSQIYLSSEK</a>  |
| 10.3  | 2379.0912 | -0.0159 | <a href="#">NAYGITPLFVAAQSGLEALR</a>  |
| 10.0  | 2379.0665 | 0.0089  | <a href="#">KMSTHVSSSPTSQIYLSSEK</a>  |
| 10.0  | 2379.0930 | -0.0176 | <a href="#">MVNPGSSSQPPPVTAGLSWKR</a> |
| 10.0  | 2379.0930 | -0.0176 | <a href="#">MVNPGSSSQPPPVTAGLSWKR</a> |

Mascot: <http://www.matrixscience.com/>

**Mascot Search Results**

**Peptide View**

MS/MS Fragmentation of **MDPNTVSSFQDILMR**

Found in **NEP**, Predicted protein of Fodor Group RG strain of A/WSN/33

Match to Query 1107: 1794.832860 from(898.423706,2+) intensity(1192190.0000)

Title: B110905\_011.03375.03375.2

Data file B110905\_011.mgf.mascot

Click mouse within plot area to zoom in by factor of two about that point

Or, Plot from  to  Da

Label all possible matches  Label matches used for scoring

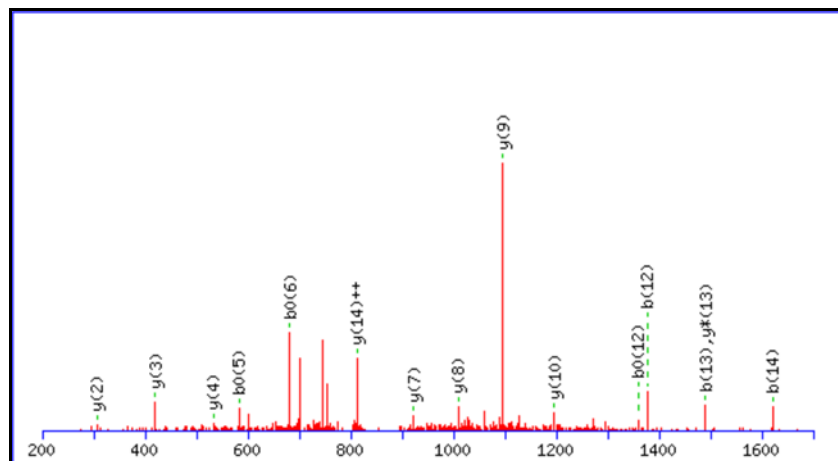

Monoisotopic mass of neutral peptide  $M_r(\text{calc})$ : 1794.8280

Fixed modifications: Carbamidomethyl (C) (apply to specified residues or termini only)

Variable modifications:

N-term : Acetyl (Protein N-term)

Ions Score: 61 Expect: 1.8e-05

Matches : 15/152 fragment ions using 14 most intense peaks ([help](#))

| #  | b         | b <sup>++</sup> | b*        | b <sup>*++</sup> | b <sup>0</sup> | b <sup>0++</sup> | Seq. | y         | y <sup>++</sup> | y*        | y <sup>*++</sup> | y <sup>0</sup> | y <sup>0++</sup> | #  |
|----|-----------|-----------------|-----------|------------------|----------------|------------------|------|-----------|-----------------|-----------|------------------|----------------|------------------|----|
| 1  | 174.0583  | 87.5328         |           |                  |                |                  | M    |           |                 |           |                  |                |                  | 15 |
| 2  | 289.0853  | 145.0463        |           |                  | 271.0747       | 136.0410         | D    | 1622.7843 | 811.8958        | 1605.7577 | 803.3825         | 1604.7737      | 802.8905         | 14 |
| 3  | 386.1380  | 193.5727        |           |                  | 368.1275       | 184.5674         | P    | 1507.7573 | 754.3823        | 1490.7308 | 745.8690         | 1489.7468      | 745.3770         | 13 |
| 4  | 500.1810  | 250.5941        | 483.1544  | 242.0808         | 482.1704       | 241.5888         | N    | 1410.7046 | 705.8559        | 1393.6780 | 697.3427         | 1392.6940      | 696.8506         | 12 |
| 5  | 601.2286  | 301.1180        | 584.2021  | 292.6047         | 583.2181       | 292.1127         | T    | 1296.6616 | 648.8345        | 1279.6351 | 640.3212         | 1278.6511      | 639.8292         | 11 |
| 6  | 700.2971  | 350.6522        | 683.2705  | 342.1389         | 682.2865       | 341.6469         | V    | 1195.6140 | 598.3106        | 1178.5874 | 589.7973         | 1177.6034      | 589.3053         | 10 |
| 7  | 787.3291  | 394.1682        | 770.3025  | 385.6549         | 769.3185       | 385.1629         | S    | 1096.5456 | 548.7764        | 1079.5190 | 540.2631         | 1078.5350      | 539.7711         | 9  |
| 8  | 874.3611  | 437.6842        | 857.3346  | 429.1709         | 856.3505       | 428.6789         | S    | 1009.5135 | 505.2604        | 992.4870  | 496.7471         | 991.5030       | 496.2551         | 8  |
| 9  | 1021.4295 | 511.2184        | 1004.4030 | 502.7051         | 1003.4190      | 502.2131         | F    | 922.4815  | 461.7444        | 905.4550  | 453.2311         | 904.4709       | 452.7391         | 7  |
| 10 | 1149.4881 | 575.2477        | 1132.4616 | 566.7344         | 1131.4775      | 566.2424         | Q    | 775.4131  | 388.2102        | 758.3865  | 379.6969         | 757.4025       | 379.2049         | 6  |
| 11 | 1264.5150 | 632.7612        | 1247.4885 | 624.2479         | 1246.5045      | 623.7559         | D    | 647.3545  | 324.1809        | 630.3280  | 315.6676         | 629.3439       | 315.1756         | 5  |
| 12 | 1377.5991 | 689.3032        | 1360.5726 | 680.7899         | 1359.5885      | 680.2979         | I    | 532.3276  | 266.6674        | 515.3010  | 258.1541         |                |                  | 4  |
| 13 | 1490.6832 | 745.8452        | 1473.6566 | 737.3319         | 1472.6726      | 736.8399         | L    | 419.2435  | 210.1254        | 402.2170  | 201.6121         |                |                  | 3  |
| 14 | 1621.7237 | 811.3655        | 1604.6971 | 802.8522         | 1603.7131      | 802.3602         | M    | 306.1594  | 153.5834        | 289.1329  | 145.0701         |                |                  | 2  |
| 15 |           |                 |           |                  |                |                  | R    | 175.1190  | 88.0631         | 158.0924  | 79.5498          |                |                  | 1  |

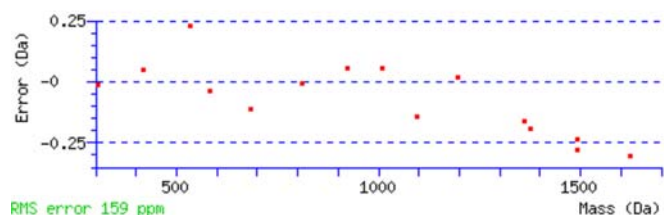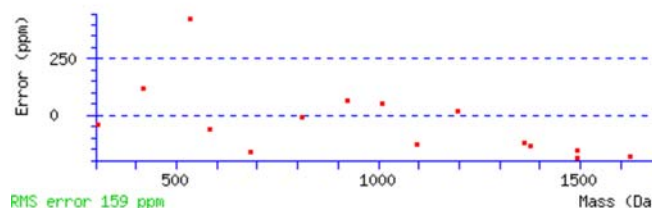

NCBI BLAST search of **MDPNTVSSFQDILMR**

(Parameters: blastp, nr protein database, expect=20000, no filter, PAM30)

Other BLAST [web gateways](#)

**All matches to this query**

| Score | Mr(calc): | Delta   | Sequence                          |
|-------|-----------|---------|-----------------------------------|
| 61.5  | 1794.8280 | 0.0048  | <a href="#">MDPNTVSSFQDILMR</a>   |
| 10.2  | 1794.8392 | -0.0064 | <a href="#">NPEISHMLNNPELMR</a>   |
| 10.2  | 1794.8392 | -0.0064 | <a href="#">NPEISHMLNNPELMR</a>   |
| 9.0   | 1794.8416 | -0.0087 | <a href="#">EVKYFSFPGELLMR</a>    |
| 8.7   | 1793.8237 | 1.0092  | <a href="#">AIYALGHQELSTQPVS</a>  |
| 7.9   | 1794.8375 | -0.0047 | <a href="#">IGALNSHMTQILPFR</a>   |
| 7.7   | 1794.8119 | 0.0210  | <a href="#">VLELSASSSDGEESTER</a> |
| 7.3   | 1792.8140 | 2.0188  | <a href="#">MNGLVTSSPEMFCLK</a>   |
| 7.3   | 1792.8140 | 2.0188  | <a href="#">MNGLVTSSPEMFCLK</a>   |
| 7.3   | 1794.8416 | -0.0087 | <a href="#">EVKYFSFPGELLMR</a>    |

Mascot: <http://www.matrixscience.com/>

**NIB74xp (egg-grown)**  
**N-terminal peptide spectra**

**Mascot Search Results**

**Peptide View**

MS/MS Fragmentation of **MDVNPTLLFLK**  
 Found in **PBI**, NIB74xp

Match to Query 1365: 1347.711400 from(674.862976,2+) intensity(22311.4000)  
 Title: B111206\_005.04406.04406.2  
 Data file B111206\_005.mgf.mascot

Click mouse within plot area to zoom in by factor of two about that point

Or, Plot from  to  Da   
 Label all possible matches  Label matches used for scoring

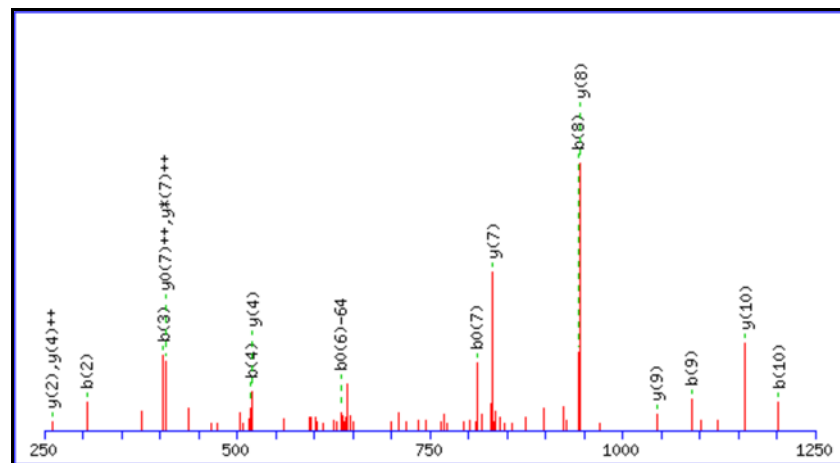

Monoisotopic mass of neutral peptide **Mr(calc):** 1347.7108  
**Fixed modifications:** Carbamidomethyl (C) (apply to specified residues or termini only)  
**Variable modifications:**  
**N-term :** Acetyl (Protein N-term)  
**M1 :** Oxidation (M), with neutral losses 0.0000(shown in table), 63.9983  
**Ions Score:** 58 **Expect:** 3.1e-05  
**Matches :** 18/154 fragment ions using 19 most intense peaks ([help](#))

| #  | b                | b <sup>++</sup> | b*        | b <sup>*++</sup> | b <sup>0</sup>  | b <sup>0++</sup> | Seq. | y                | y <sup>++</sup> | y*        | y <sup>*++</sup> | y <sup>0</sup> | y <sup>0++</sup> | #  |
|----|------------------|-----------------|-----------|------------------|-----------------|------------------|------|------------------|-----------------|-----------|------------------|----------------|------------------|----|
| 1  | 190.0532         | 95.5303         |           |                  |                 |                  | M    |                  |                 |           |                  |                |                  | 11 |
| 2  | <b>305.0802</b>  | 153.0437        |           |                  | 287.0696        | 144.0384         | D    | <b>1159.6721</b> | 580.3397        | 1142.6456 | 571.8264         | 1141.6616      | 571.3344         | 10 |
| 3  | <b>404.1486</b>  | 202.5779        |           |                  | 386.1380        | 193.5727         | V    | <b>1044.6452</b> | 522.8262        | 1027.6186 | 514.3130         | 1026.6346      | 513.8210         | 9  |
| 4  | <b>518.1915</b>  | 259.5994        | 501.1650  | 251.0861         | 500.1810        | 250.5941         | N    | <b>945.5768</b>  | 473.2920        | 928.5502  | 464.7788         | 927.5662       | 464.2867         | 8  |
| 5  | 615.2443         | 308.1258        | 598.2177  | 299.6125         | 597.2337        | 299.1205         | P    | <b>831.5339</b>  | 416.2706        | 814.5073  | <b>407.7573</b>  | 813.5233       | <b>407.2653</b>  | 7  |
| 6  | 716.2920         | 358.6496        | 699.2654  | 350.1363         | 698.2814        | 349.6443         | T    | 734.4811         | 367.7442        | 717.4545  | 359.2309         | 716.4705       | 358.7389         | 6  |
| 7  | 829.3760         | 415.1917        | 812.3495  | 406.6784         | <b>811.3655</b> | 406.1864         | L    | 633.4334         | 317.2203        | 616.4069  | 308.7071         |                |                  | 5  |
| 8  | <b>942.4601</b>  | 471.7337        | 925.4335  | 463.2204         | 924.4495        | 462.7284         | L    | <b>520.3493</b>  | <b>260.6783</b> | 503.3228  | 252.1650         |                |                  | 4  |
| 9  | <b>1089.5285</b> | 545.2679        | 1072.5020 | 536.7546         | 1071.5179       | 536.2626         | F    | <b>407.2653</b>  | 204.1363        | 390.2387  | 195.6230         |                |                  | 3  |
| 10 | <b>1202.6126</b> | 601.8099        | 1185.5860 | 593.2967         | 1184.6020       | 592.8046         | L    | <b>260.1969</b>  | 130.6021        | 243.1703  | 122.0888         |                |                  | 2  |
| 11 |                  |                 |           |                  |                 |                  | K    | 147.1128         | 74.0600         | 130.0863  | 65.5468          |                |                  | 1  |

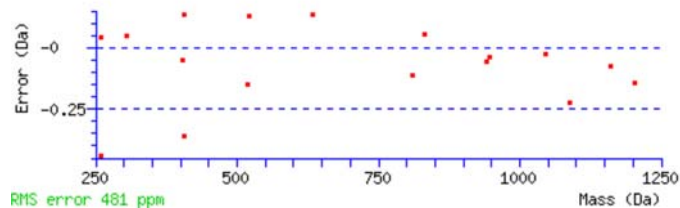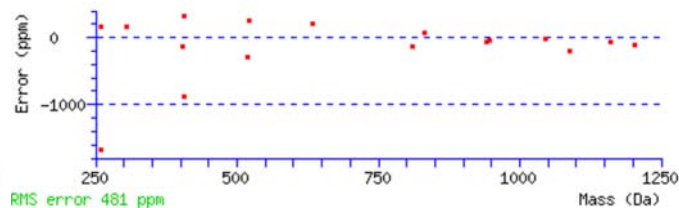

NCBI **BLAST** search of [MDVNPTLLFLK](#)  
 (Parameters: blastp, nr protein database, expect=20000, no filter, PAM30)  
 Other BLAST [web gateways](#)

All matches to this query

| Score | Mr(calc): | Delta   | Sequence                      |
|-------|-----------|---------|-------------------------------|
| 57.5  | 1347.7108 | 0.0006  | <a href="#">MDVNPTLLFLK</a>   |
| 8.9   | 1347.6881 | 0.0233  | <a href="#">NTAGTIGKSQELK</a> |
| 6.5   | 1347.6955 | 0.0159  | <a href="#">NGTILVDNMLIK</a>  |
| 4.9   | 1345.7248 | 1.9866  | <a href="#">QATVMRQNVKR</a>   |
| 4.9   | 1347.7254 | -0.0140 | <a href="#">MKIMGEVLNGIK</a>  |
| 4.5   | 1345.7136 | 1.9978  | <a href="#">MRPTTVENVKR</a>   |
| 3.8   | 1347.6922 | 0.0192  | <a href="#">AALDFVVEEDLK</a>  |
| 3.7   | 1347.7034 | 0.0080  | <a href="#">EVRQLAEDFLK</a>   |
| 3.0   | 1347.7068 | 0.0046  | <a href="#">SGDPKDTKMLIK</a>  |
| 3.0   | 1347.6951 | 0.0163  | <a href="#">YRISKYPTLK</a>    |

Mascot: <http://www.matrixscience.com/>

# MASCOT SCIENCE Mascot Search Results

## Peptide View

MS/MS Fragmentation of **SLLTEVETYVLSIIPSGPLK**

Found in **M1**, NIB74xp

Match to Query 3093: 2158.209570 from(1080.112061,2+) intensity(7589.7200)

Title: B111206\_005.06447.06447.2

Data file B111206\_005.mgf.mascot

Click mouse within plot area to zoom in by factor of two about that point

Or, Plot from  to  Da

Label all possible matches  Label matches used for scoring

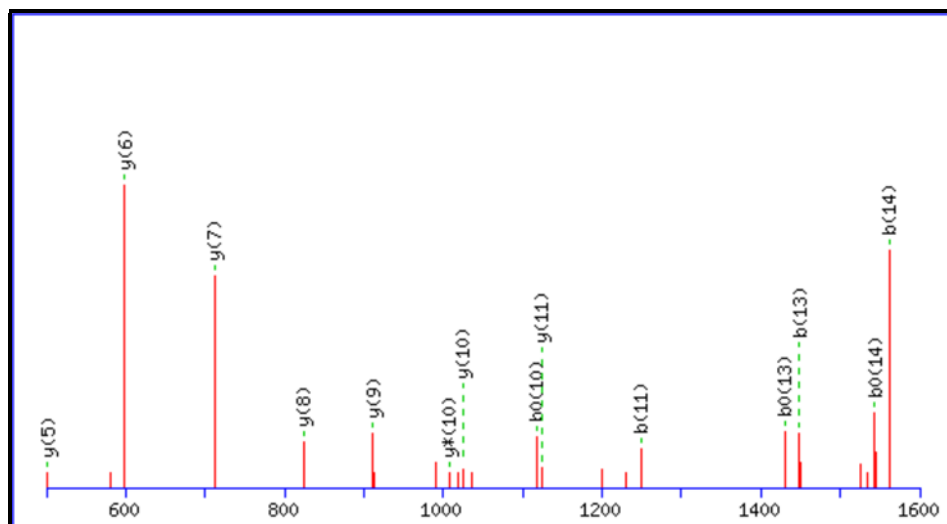

Monoisotopic mass of neutral peptide Mr(calc): 2158.2137

Fixed modifications: Carbamidomethyl (C) (apply to specified residues or termini only)

Ions Score: 54 Expect: 0.00027

Matches : 14/182 fragment ions using 17 most intense peaks ([help](#))

| #  | b         | b <sup>++</sup> | b <sup>0</sup> | b <sup>0++</sup> | Seq. | y         | y <sup>++</sup> | y*        | y <sup>*++</sup> | y <sup>0</sup> | y <sup>0++</sup> | #  |
|----|-----------|-----------------|----------------|------------------|------|-----------|-----------------|-----------|------------------|----------------|------------------|----|
| 1  | 88.0393   | 44.5233         | 70.0287        | 35.5180          | S    |           |                 |           |                  |                |                  | 20 |
| 2  | 201.1234  | 101.0653        | 183.1128       | 92.0600          | L    | 2072.1889 | 1036.5981       | 2055.1624 | 1028.0848        | 2054.1784      | 1027.5928        | 19 |
| 3  | 314.2074  | 157.6074        | 296.1969       | 148.6021         | L    | 1959.1049 | 980.0561        | 1942.0783 | 971.5428         | 1941.0943      | 971.0508         | 18 |
| 4  | 415.2551  | 208.1312        | 397.2445       | 199.1259         | T    | 1846.0208 | 923.5140        | 1828.9943 | 915.0008         | 1828.0102      | 914.5088         | 17 |
| 5  | 544.2977  | 272.6525        | 526.2871       | 263.6472         | E    | 1744.9731 | 872.9902        | 1727.9466 | 864.4769         | 1726.9626      | 863.9849         | 16 |
| 6  | 643.3661  | 322.1867        | 625.3556       | 313.1814         | V    | 1615.9305 | 808.4689        | 1598.9040 | 799.9556         | 1597.9200      | 799.4636         | 15 |
| 7  | 772.4087  | 386.7080        | 754.3981       | 377.7027         | E    | 1516.8621 | 758.9347        | 1499.8356 | 750.4214         | 1498.8516      | 749.9294         | 14 |
| 8  | 873.4564  | 437.2318        | 855.4458       | 428.2266         | T    | 1387.8195 | 694.4134        | 1370.7930 | 685.9001         | 1369.8090      | 685.4081         | 13 |
| 9  | 1036.5197 | 518.7635        | 1018.5092      | 509.7582         | Y    | 1286.7719 | 643.8896        | 1269.7453 | 635.3763         | 1268.7613      | 634.8843         | 12 |
| 10 | 1135.5881 | 568.2977        | 1117.5776      | 559.2924         | V    | 1123.7085 | 562.3579        | 1106.6820 | 553.8446         | 1105.6980      | 553.3526         | 11 |
| 11 | 1248.6722 | 624.8397        | 1230.6616      | 615.8345         | L    | 1024.6401 | 512.8237        | 1007.6136 | 504.3104         | 1006.6295      | 503.8184         | 10 |
| 12 | 1335.7042 | 668.3558        | 1317.6937      | 659.3505         | S    | 911.5560  | 456.2817        | 894.5295  | 447.7684         | 893.5455       | 447.2764         | 9  |
| 13 | 1448.7883 | 724.8978        | 1430.7777      | 715.8925         | I    | 824.5240  | 412.7656        | 807.4975  | 404.2524         | 806.5135       | 403.7604         | 8  |
| 14 | 1561.8724 | 781.4398        | 1543.8618      | 772.4345         | I    | 711.4400  | 356.2236        | 694.4134  | 347.7103         | 693.4294       | 347.2183         | 7  |
| 15 | 1658.9251 | 829.9662        | 1640.9146      | 820.9609         | P    | 598.3559  | 299.6816        | 581.3293  | 291.1683         | 580.3453       | 290.6763         | 6  |
| 16 | 1745.9571 | 873.4822        | 1727.9466      | 864.4769         | S    | 501.3031  | 251.1552        | 484.2766  | 242.6419         | 483.2926       | 242.1499         | 5  |
| 17 | 1802.9786 | 901.9929        | 1784.9680      | 892.9877         | G    | 414.2711  | 207.6392        | 397.2445  | 199.1259         |                |                  | 4  |
| 18 | 1900.0314 | 950.5193        | 1882.0208      | 941.5140         | P    | 357.2496  | 179.1285        | 340.2231  | 170.6152         |                |                  | 3  |
| 19 | 2013.1154 | 1007.0614       | 1995.1049      | 998.0561         | L    | 260.1969  | 130.6021        | 243.1703  | 122.0888         |                |                  | 2  |



|    |  |  |  |  |          |          |         |          |         |  |  |          |
|----|--|--|--|--|----------|----------|---------|----------|---------|--|--|----------|
| 20 |  |  |  |  | <b>K</b> | 147.1128 | 74.0600 | 130.0863 | 65.5468 |  |  | <b>1</b> |
|----|--|--|--|--|----------|----------|---------|----------|---------|--|--|----------|

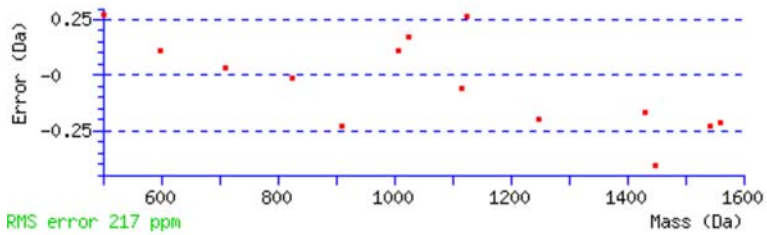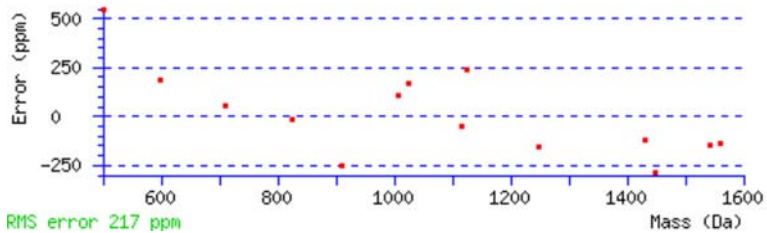

NCBI **BLAST** search of [SLLTEVETYVLSIIPSGPLK](#)  
 (Parameters: blastp, nr protein database, expect=20000, no filter, PAM30)  
 Other BLAST [web gateways](#)

**All matches to this query**

| Score | Mr(calc): | Delta   | Sequence                              |
|-------|-----------|---------|---------------------------------------|
| 53.7  | 2158.2137 | -0.0041 | <a href="#">SLLTEVETYVLSIIPSGPLK</a>  |
| 18.3  | 2158.1971 | 0.0125  | <a href="#">QGVVVRGSRPPVSRALPQPEK</a> |
| 12.6  | 2157.2131 | 0.9965  | <a href="#">QGVVVRGSRPPVSRALPQPEK</a> |
| 9.8   | 2158.1972 | 0.0123  | <a href="#">WRVRLAII EYMPLLAGQL</a>   |
| 8.8   | 2158.2435 | -0.0339 | <a href="#">QVITII LLLLCKASDFR</a>    |
| 6.0   | 2157.1727 | 1.0369  | <a href="#">KKEVLIAGL KPSLAVYLR</a>   |
| 6.0   | 2157.1714 | 1.0381  | <a href="#">NAKPVSI LRDLITEAMEIK</a>  |
| 4.8   | 2158.2126 | -0.0030 | <a href="#">IAQGISGLVRPLLSGLKVSK</a>  |
| 4.4   | 2158.1779 | 0.0316  | <a href="#">KNLQLLRDMQTIQTS LQK</a>   |
| 4.4   | 2158.1779 | 0.0316  | <a href="#">KNLQLLRDMQTIQTS LQK</a>   |

**Mascot:** <http://www.matrixscience.com/>

# MASCOT SCIENCE Mascot Search Results

## Peptide View

MS/MS Fragmentation of **SLLTEVETYVLSIIPSGPLK**

Found in **M1**, NIB74xp

Match to Query 3151: 2200.227392 from(1101.120972,2+) intensity(1417000.0000)

Title: B111206\_005.06676.06676.2

Data file B111206\_005.mgf.mascot

Click mouse within plot area to zoom in by factor of two about that point

Or, Plot from  to  Da

Label all possible matches  Label matches used for scoring

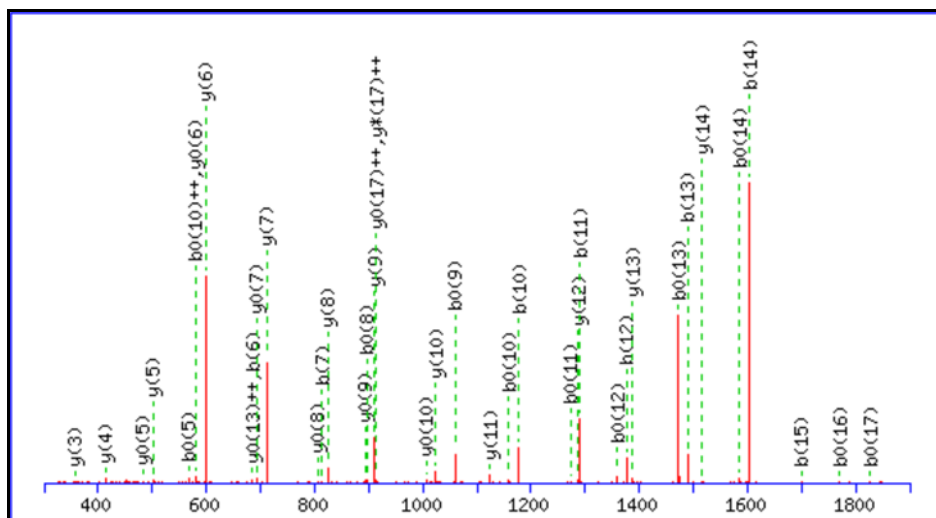

Monoisotopic mass of neutral peptide Mr(calc): 2200.2242

Fixed modifications: Carbamidomethyl (C) (apply to specified residues or termini only)

Variable modifications:

N-term : Acetyl (Protein N-term)

Ions Score: 78 Expect: 8.6e-07

Matches : 40/182 fragment ions using 59 most intense peaks [\(help\)](#)

| #  | b         | b <sup>++</sup> | b <sup>0</sup> | b <sup>0++</sup> | Seq. | y         | y <sup>++</sup> | y <sup>*</sup> | y <sup>*++</sup> | y <sup>0</sup> | y <sup>0++</sup> | #  |
|----|-----------|-----------------|----------------|------------------|------|-----------|-----------------|----------------|------------------|----------------|------------------|----|
| 1  | 130.0499  | 65.5286         | 112.0393       | 56.5233          | S    |           |                 |                |                  |                |                  | 20 |
| 2  | 243.1339  | 122.0706        | 225.1234       | 113.0653         | L    | 2072.1889 | 1036.5981       | 2055.1624      | 1028.0848        | 2054.1784      | 1027.5928        | 19 |
| 3  | 356.2180  | 178.6126        | 338.2074       | 169.6074         | L    | 1959.1049 | 980.0561        | 1942.0783      | 971.5428         | 1941.0943      | 971.0508         | 18 |
| 4  | 457.2657  | 229.1365        | 439.2551       | 220.1312         | T    | 1846.0208 | 923.5140        | 1828.9943      | 915.0008         | 1828.0102      | 914.5088         | 17 |
| 5  | 586.3083  | 293.6578        | 568.2977       | 284.6525         | E    | 1744.9731 | 872.9902        | 1727.9466      | 864.4769         | 1726.9626      | 863.9849         | 16 |
| 6  | 685.3767  | 343.1920        | 667.3661       | 334.1867         | V    | 1615.9305 | 808.4689        | 1598.9040      | 799.9556         | 1597.9200      | 799.4636         | 15 |
| 7  | 814.4193  | 407.7133        | 796.4087       | 398.7080         | E    | 1516.8621 | 758.9347        | 1499.8356      | 750.4214         | 1498.8516      | 749.9294         | 14 |
| 8  | 915.4670  | 458.2371        | 897.4564       | 449.2318         | T    | 1387.8195 | 694.4134        | 1370.7930      | 685.9001         | 1369.8090      | 685.4081         | 13 |
| 9  | 1078.5303 | 539.7688        | 1060.5197      | 530.7635         | Y    | 1286.7719 | 643.8896        | 1269.7453      | 635.3763         | 1268.7613      | 634.8843         | 12 |
| 10 | 1177.5987 | 589.3030        | 1159.5881      | 580.2977         | V    | 1123.7085 | 562.3579        | 1106.6820      | 553.8446         | 1105.6980      | 553.3526         | 11 |
| 11 | 1290.6828 | 645.8450        | 1272.6722      | 636.8397         | L    | 1024.6401 | 512.8237        | 1007.6136      | 504.3104         | 1006.6295      | 503.8184         | 10 |
| 12 | 1377.7148 | 689.3610        | 1359.7042      | 680.3558         | S    | 911.5560  | 456.2817        | 894.5295       | 447.7684         | 893.5455       | 447.2764         | 9  |
| 13 | 1490.7989 | 745.9031        | 1472.7883      | 736.8978         | I    | 824.5240  | 412.7656        | 807.4975       | 404.2524         | 806.5135       | 403.7604         | 8  |
| 14 | 1603.8829 | 802.4451        | 1585.8724      | 793.4398         | I    | 711.4400  | 356.2236        | 694.4134       | 347.7103         | 693.4294       | 347.2183         | 7  |
| 15 | 1700.9357 | 850.9715        | 1682.9251      | 841.9662         | P    | 598.3559  | 299.6816        | 581.3293       | 291.1683         | 580.3453       | 290.6763         | 6  |
| 16 | 1787.9677 | 894.4875        | 1769.9571      | 885.4822         | S    | 501.3031  | 251.1552        | 484.2766       | 242.6419         | 483.2926       | 242.1499         | 5  |
| 17 | 1844.9892 | 922.9982        | 1826.9786      | 913.9929         | G    | 414.2711  | 207.6392        | 397.2445       | 199.1259         |                |                  | 4  |
| 18 | 1942.0419 | 971.5246        | 1924.0314      | 962.5193         | P    | 357.2496  | 179.1285        | 340.2231       | 170.6152         |                |                  | 3  |

|    |           |           |           |           |   |          |          |          |          |  |  |   |
|----|-----------|-----------|-----------|-----------|---|----------|----------|----------|----------|--|--|---|
| 19 | 2055.1260 | 1028.0666 | 2037.1154 | 1019.0614 | L | 260.1969 | 130.6021 | 243.1703 | 122.0888 |  |  | 2 |
| 20 |           |           |           |           | K | 147.1128 | 74.0600  | 130.0863 | 65.5468  |  |  | 1 |

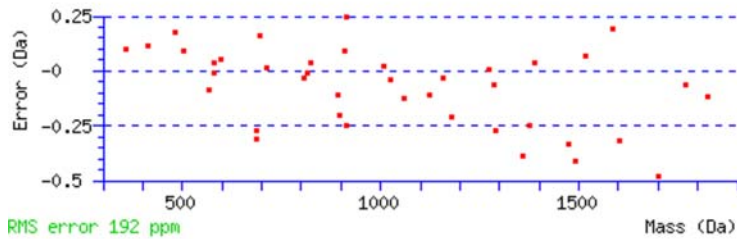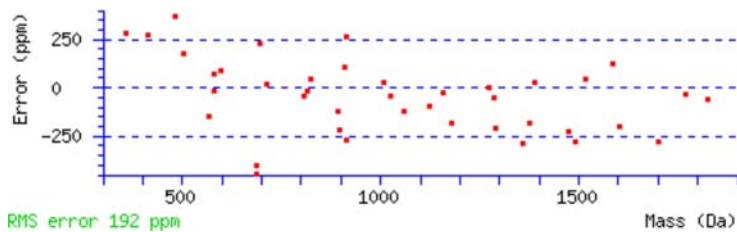

NCBI **BLAST** search of [SLLTEVETYVLSIIPSGPLK](#)

(Parameters: blastp, nr protein database, expect=20000, no filter, PAM30)

Other BLAST [web gateways](#)

#### All matches to this query

| Score | Mr(calc): | Delta  | Sequence                              |
|-------|-----------|--------|---------------------------------------|
| 77.5  | 2200.2242 | 0.0032 | <a href="#">SLLTEVETYVLSIIPSGPLK</a>  |
| 12.0  | 2199.1899 | 1.0375 | <a href="#">AAAGAVRLLVVQPQPEEQPPK</a> |
| 9.9   | 2199.2099 | 1.0175 | <a href="#">GMAAPGPPQLPWLRLGPRLR</a>  |
| 5.5   | 2199.1816 | 1.0458 | <a href="#">YTRPTPVQKHAIPPIKEK</a>    |
| 5.5   | 2199.1816 | 1.0458 | <a href="#">YTRPTPVQKHAIPPIKEK</a>    |
| 5.4   | 2198.2535 | 1.9739 | <a href="#">IIGEKYQALNSRLLIGRPR</a>   |
| 2.5   | 2198.1976 | 2.0298 | <a href="#">YTRPTPVQKHAIPPIKEK</a>    |
| 2.5   | 2198.1976 | 2.0298 | <a href="#">YTRPTPVQKHAIPPIKEK</a>    |
| 2.5   | 2198.2059 | 2.0215 | <a href="#">AAAGAVRLLVVQPQPEEQPPK</a> |
| 2.5   | 2198.2059 | 2.0215 | <a href="#">AAAGAVRLLVVQPQPEEQPPK</a> |

Mascot: <http://www.matrixscience.com/>

**MASCOT SCIENCE Mascot Search Results**

**Peptide View**

MS/MS Fragmentation of **SLLTEVETYVLSIIPSGPLKAEIAQR**  
 Found in **M1**, NIB74xp

Match to Query 4146: 2868.584250 from(957.202026,3+) intensity(18955.3000)  
 Title: B111206\_005.06613.06613.3  
 Data file B111206\_005.mgf.mascot

Click mouse within plot area to zoom in by factor of two about that point

Or, Plot from  to  Da

Label all possible matches  Label matches used for scoring

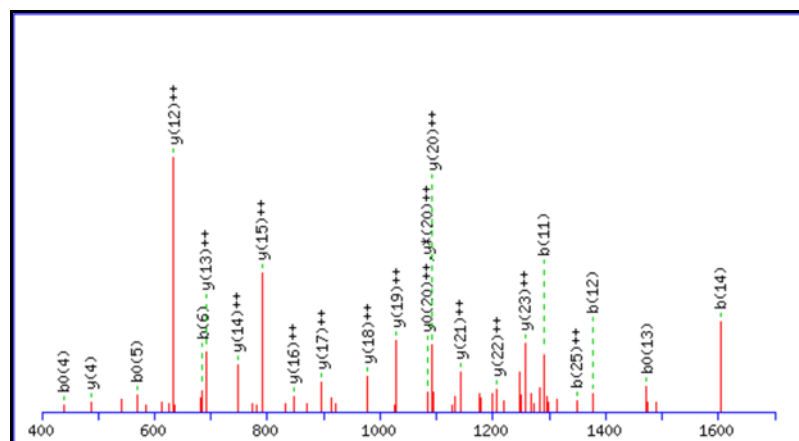

**Monoisotopic mass of neutral peptide Mr(calc):** 2868.5848  
**Fixed modifications:** Carbamidomethyl (C) (apply to specified residues or termini only)  
**Variable modifications:**  
**N-term:** Acetyl (Protein N-term)  
**Ions Score:** 96 **Expect:** 1.5e-08  
**Matches:** 23/254 fragment ions using 24 most intense peaks ([help](#))

| #  | b         | b <sup>++</sup> | b <sup>*</sup> | b <sup>*++</sup> | b <sup>0</sup> | b <sup>0++</sup> | Seq. | y         | y <sup>++</sup> | y <sup>*</sup> | y <sup>*++</sup> | y <sup>0</sup> | y <sup>0++</sup> | #  |
|----|-----------|-----------------|----------------|------------------|----------------|------------------|------|-----------|-----------------|----------------|------------------|----------------|------------------|----|
| 1  | 130.0499  | 65.5286         |                |                  | 112.0393       | 56.5233          | S    |           |                 |                |                  |                |                  | 26 |
| 2  | 243.1339  | 122.0706        |                |                  | 225.1234       | 113.0653         | L    | 2740.5495 | 1370.7784       | 2723.5230      | 1362.2651        | 2722.5389      | 1361.7731        | 25 |
| 3  | 356.2180  | 178.6126        |                |                  | 338.2074       | 169.6074         | L    | 2627.4654 | 1314.2364       | 2610.4389      | 1305.7231        | 2609.4549      | 1305.2311        | 24 |
| 4  | 457.2657  | 229.1365        |                |                  | 439.2551       | 220.1312         | T    | 2514.3814 | 1257.6943       | 2497.3548      | 1249.1811        | 2496.3708      | 1248.6890        | 23 |
| 5  | 586.3083  | 293.6578        |                |                  | 568.2977       | 284.6525         | E    | 2413.3337 | 1207.1705       | 2396.3072      | 1198.6572        | 2395.3231      | 1198.1652        | 22 |
| 6  | 685.3767  | 343.1920        |                |                  | 667.3661       | 334.1867         | V    | 2284.2911 | 1142.6492       | 2267.2646      | 1134.1359        | 2266.2805      | 1133.6439        | 21 |
| 7  | 814.4193  | 407.7133        |                |                  | 796.4087       | 398.7080         | E    | 2185.2227 | 1093.1150       | 2168.1961      | 1084.6017        | 2167.2121      | 1084.1097        | 20 |
| 8  | 915.4670  | 458.2371        |                |                  | 897.4564       | 449.2318         | T    | 2056.1801 | 1028.5937       | 2039.1536      | 1020.0804        | 2038.1695      | 1019.5884        | 19 |
| 9  | 1078.5303 | 539.7688        |                |                  | 1060.5197      | 530.7635         | Y    | 1955.1324 | 978.0699        | 1938.1059      | 969.5566         | 1937.1219      | 969.0646         | 18 |
| 10 | 1177.5987 | 589.3030        |                |                  | 1159.5881      | 580.2977         | V    | 1792.0691 | 896.5382        | 1775.0425      | 888.0249         | 1774.0585      | 887.5329         | 17 |
| 11 | 1290.6828 | 645.8450        |                |                  | 1272.6722      | 636.8397         | L    | 1693.0007 | 847.0040        | 1675.9741      | 838.4907         | 1674.9901      | 837.9987         | 16 |
| 12 | 1377.7148 | 689.3610        |                |                  | 1359.7042      | 680.3558         | S    | 1579.9166 | 790.4619        | 1562.8901      | 781.9487         | 1561.9061      | 781.4567         | 15 |
| 13 | 1490.7989 | 745.9031        |                |                  | 1472.7883      | 736.8978         | I    | 1492.8846 | 746.9459        | 1475.8580      | 738.4327         | 1474.8740      | 737.9407         | 14 |
| 14 | 1603.8829 | 802.4451        |                |                  | 1585.8724      | 793.4398         | I    | 1379.8005 | 690.4039        | 1362.7740      | 681.8906         | 1361.7900      | 681.3986         | 13 |
| 15 | 1700.9357 | 850.9715        |                |                  | 1682.9251      | 841.9662         | P    | 1266.7165 | 633.8619        | 1249.6899      | 625.3486         | 1248.7059      | 624.8566         | 12 |
| 16 | 1787.9677 | 894.4875        |                |                  | 1769.9571      | 885.4822         | S    | 1169.6637 | 585.3355        | 1152.6371      | 576.8222         | 1151.6531      | 576.3302         | 11 |
| 17 | 1844.9892 | 922.9982        |                |                  | 1826.9786      | 913.9929         | G    | 1082.6317 | 541.8195        | 1065.6051      | 533.3062         | 1064.6211      | 532.8142         | 10 |
| 18 | 1942.0419 | 971.5246        |                |                  | 1924.0314      | 962.5193         | P    | 1025.6102 | 513.3087        | 1008.5837      | 504.7955         | 1007.5996      | 504.3035         | 9  |
| 19 | 2055.1260 | 1028.0666       |                |                  | 2037.1154      | 1019.0614        | L    | 928.5574  | 464.7824        | 911.5309       | 456.2691         | 910.5469       | 455.7771         | 8  |
| 20 | 2183.2210 | 1092.1141       | 2166.1944      | 1083.6008        | 2165.2104      | 1083.1088        | K    | 815.4734  | 408.2403        | 798.4468       | 399.7271         | 797.4628       | 399.2350         | 7  |
| 21 | 2254.2581 | 1127.6327       | 2237.2315      | 1119.1194        | 2236.2475      | 1118.6274        | A    | 687.3784  | 344.1928        | 670.3519       | 335.6796         | 669.3679       | 335.1876         | 6  |
| 22 | 2383.3007 | 1192.1540       | 2366.2741      | 1183.6407        | 2365.2901      | 1183.1487        | E    | 616.3413  | 308.6743        | 599.3148       | 300.1610         | 598.3307       | 299.6690         | 5  |
| 23 | 2496.3847 | 1248.6960       | 2479.3582      | 1240.1827        | 2478.3742      | 1239.6907        | I    | 487.2987  | 244.1530        | 470.2722       | 235.6397         |                |                  | 4  |
| 24 | 2567.4219 | 1284.2146       | 2550.3953      | 1275.7013        | 2549.4113      | 1275.2093        | A    | 374.2146  | 187.6110        | 357.1881       | 179.0977         |                |                  | 3  |
| 25 | 2695.4804 | 1348.2439       | 2678.4539      | 1339.7306        | 2677.4699      | 1339.2386        | Q    | 303.1775  | 152.0924        | 286.1510       | 143.5791         |                |                  | 2  |
| 26 |           |                 |                |                  |                |                  | R    | 175.1190  | 88.0631         | 158.0924       | 79.5498          |                |                  | 1  |

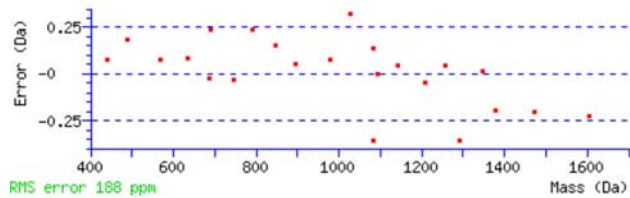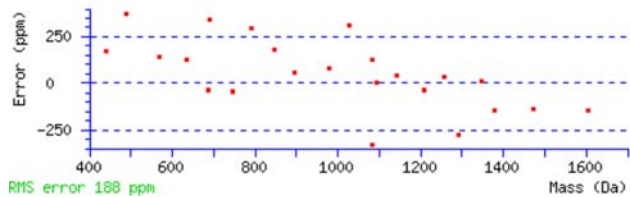

NCBI BLAST search of [SLLTEVETYVLSIIPSGPLKAEIAQR](#)

(Parameters: blastp, nr protein database, expect=20000, no filter, PAM30)

Other BLAST [web gateways](#)

**All matches to this query**

| Score | Mr(calc): | Delta   | Sequence                                      |
|-------|-----------|---------|-----------------------------------------------|
| 96.4  | 2868.5848 | -0.0005 | <a href="#">SLLTEVETYVLSIIPSGPLKAEIAQR</a>    |
| 20.4  | 2868.5722 | 0.0121  | <a href="#">WGPGSHLA AVR SAAELRLLAELLNAXR</a> |
| 5.5   | 2867.5882 | 0.9961  | <a href="#">WGPGSHLA AVR SAAELRLLAELLNAXR</a> |
| 4.0   | 2868.6155 | -0.0313 | <a href="#">EIQQMAICMGIHTVLAVKXFLVKK</a>      |
| 3.7   | 2868.6185 | -0.0342 | <a href="#">KQAKENKPLIPQPQILGLTASPGVGGAR</a>  |
| 3.6   | 2867.5426 | 1.0416  | <a href="#">DRPTRGEALLDLVLTNMEEIVKEVK</a>     |
| 2.3   | 2866.6006 | 1.9836  | <a href="#">MVHTTSPLLLLLLLSLALVAPLSAR</a>     |
| 1.8   | 2866.5569 | 2.0274  | <a href="#">LVAVAQSGPLRVE SLNTVKDLPLPR</a>    |
| 1.8   | 2866.5569 | 2.0274  | <a href="#">LVAVAQSGPLRVE SLNTVKDLPLPR</a>    |
| 1.7   | 2867.6054 | 0.9789  | <a href="#">VHATSPLLLLLLLSLALVAPLSARK</a>     |

Mascot: <http://www.matrixscience.com/>

# MASCOT SCIENCE Mascot Search Results

## Peptide View

MS/MS Fragmentation of **SLLTEVETPIR**

Found in **M2**, NIB74xp

Match to Query 1108: 1256.696508 from(629.355530,2+) intensity(107025.0000)

Title: B111206\_005.03205.03205.2

Data file B111206\_005.mgf.mascot

Click mouse within plot area to zoom in by factor of two about that point

Or, Plot from  to  Da

Label all possible matches  Label matches used for scoring

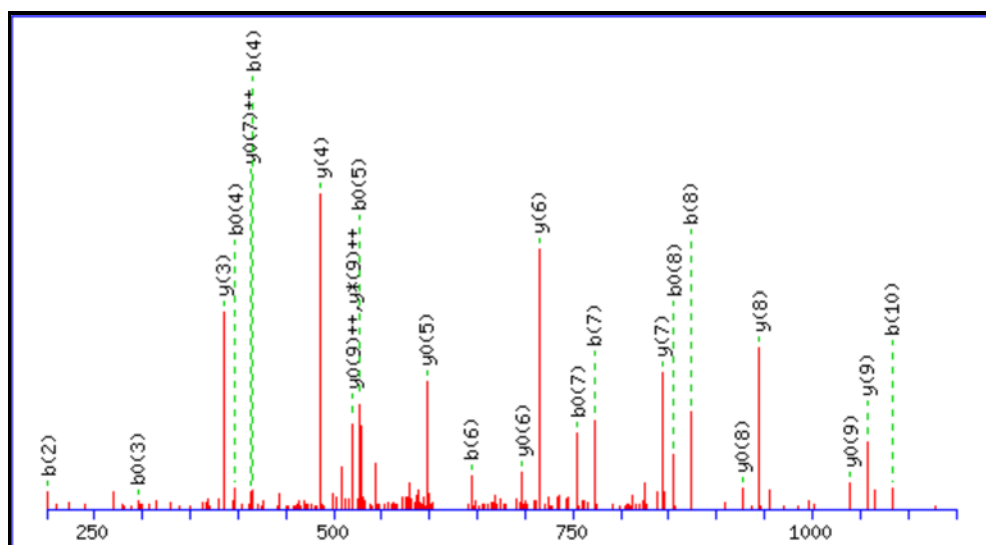

Monoisotopic mass of neutral peptide  $M_r(\text{calc})$ : 1256.6976

Fixed modifications: Carbamidomethyl (C) (apply to specified residues or termini only)

Ions Score: 57 Expect: 0.00011

Matches : 24/94 fragment ions using 28 most intense peaks ([help](#))

| #  | b                | b <sup>++</sup> | b <sup>0</sup>  | b <sup>0++</sup> | Seq. | y                | y <sup>++</sup> | y*        | y <sup>*++</sup> | y <sup>0</sup>   | y <sup>0++</sup> | #  |
|----|------------------|-----------------|-----------------|------------------|------|------------------|-----------------|-----------|------------------|------------------|------------------|----|
| 1  | 88.0393          | 44.5233         | 70.0287         | 35.5180          | S    |                  |                 |           |                  |                  |                  | 11 |
| 2  | <b>201.1234</b>  | 101.0653        | 183.1128        | 92.0600          | L    | 1170.6729        | 585.8401        | 1153.6463 | 577.3268         | 1152.6623        | 576.8348         | 10 |
| 3  | 314.2074         | 157.6074        | <b>296.1969</b> | 148.6021         | L    | <b>1057.5888</b> | 529.2980        | 1040.5623 | <b>520.7848</b>  | <b>1039.5782</b> | <b>520.2928</b>  | 9  |
| 4  | <b>415.2551</b>  | 208.1312        | <b>397.2445</b> | 199.1259         | T    | <b>944.5047</b>  | 472.7560        | 927.4782  | 464.2427         | <b>926.4942</b>  | 463.7507         | 8  |
| 5  | 544.2977         | 272.6525        | <b>526.2871</b> | 263.6472         | E    | <b>843.4571</b>  | 422.2322        | 826.4305  | 413.7189         | 825.4465         | <b>413.2269</b>  | 7  |
| 6  | <b>643.3661</b>  | 322.1867        | 625.3556        | 313.1814         | V    | <b>714.4145</b>  | 357.7109        | 697.3879  | 349.1976         | <b>696.4039</b>  | 348.7056         | 6  |
| 7  | <b>772.4087</b>  | 386.7080        | <b>754.3981</b> | 377.7027         | E    | 615.3461         | 308.1767        | 598.3195  | 299.6634         | <b>597.3355</b>  | 299.1714         | 5  |
| 8  | <b>873.4564</b>  | 437.2318        | <b>855.4458</b> | 428.2266         | T    | <b>486.3035</b>  | 243.6554        | 469.2769  | 235.1421         | 468.2929         | 234.6501         | 4  |
| 9  | 970.5092         | 485.7582        | 952.4986        | 476.7529         | P    | <b>385.2558</b>  | 193.1315        | 368.2292  | 184.6183         |                  |                  | 3  |
| 10 | <b>1083.5932</b> | 542.3002        | 1065.5827       | 533.2950         | I    | 288.2030         | 144.6051        | 271.1765  | 136.0919         |                  |                  | 2  |
| 11 |                  |                 |                 |                  | R    | 175.1190         | 88.0631         | 158.0924  | 79.5498          |                  |                  | 1  |

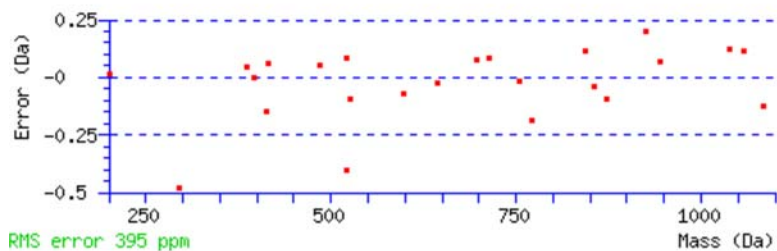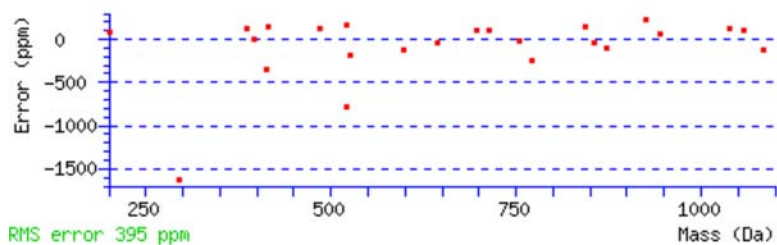

NCBI **BLAST** search of [SLLTEVETPIR](#)

(Parameters: blastp, nr protein database, expect=20000, no filter, PAM30)

Other BLAST [web gateways](#)

#### All matches to this query

| Score | Mr(calc): | Delta   | Sequence                      |
|-------|-----------|---------|-------------------------------|
| 57.0  | 1256.6976 | -0.0011 | <a href="#">SLLTEVETPIR</a>   |
| 14.0  | 1256.6837 | 0.0128  | <a href="#">KGQTAVAGQAAQK</a> |
| 7.2   | 1256.6724 | 0.0241  | <a href="#">AIEAVKNEVER</a>   |
| 5.1   | 1256.6837 | 0.0128  | <a href="#">KGGNQVEIKQR</a>   |
| 5.1   | 1256.6837 | 0.0128  | <a href="#">KGGNQVEIKQR</a>   |
| 4.5   | 1256.6949 | 0.0016  | <a href="#">QQRAQTLRVR</a>    |
| 4.0   | 1256.6949 | 0.0016  | <a href="#">QERAQSLRLR</a>    |
| 3.3   | 1256.7088 | -0.0123 | <a href="#">SLIVAGLGDGSIR</a> |
| 1.2   | 1256.6837 | 0.0129  | <a href="#">REEEGIQLRK</a>    |
| 1.2   | 1256.6837 | 0.0129  | <a href="#">REEEGLQLRK</a>    |

Mascot: <http://www.matrixscience.com/>



# MATRIX SCIENCE Mascot Search Results

## Peptide View

MS/MS Fragmentation of **SLLTEVETPIR**

Found in **M2**, NIB74xp

Match to Query 1058: 1298.707494 from(650.361023,2+) intensity(216550.5781)

Title: B120210\_005.04750.04750.2

Data file B120210\_005.mgf.mascot

Click mouse within plot area to zoom in by factor of two about that point

Or, Plot from  to  Da

Label all possible matches  Label matches used for scoring

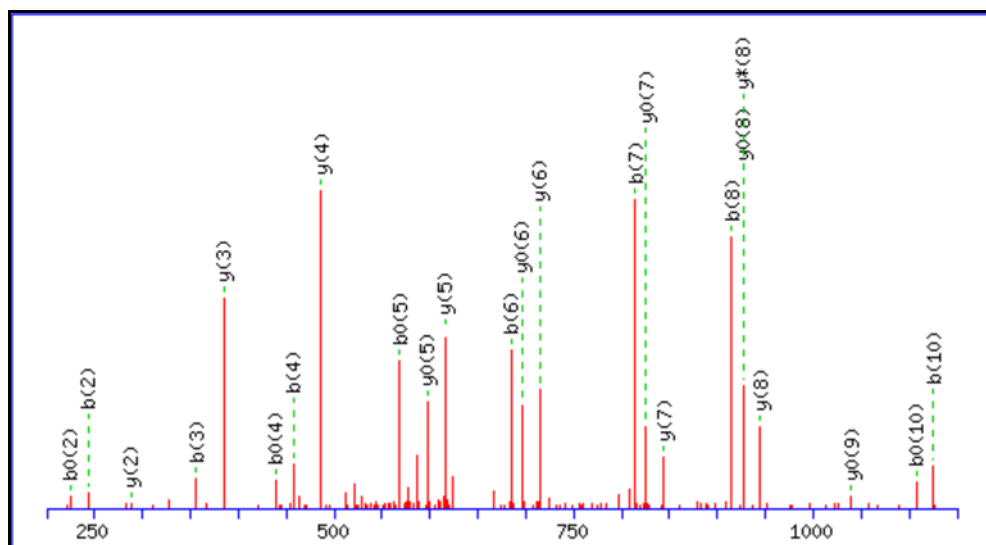

Monoisotopic mass of neutral peptide  $M_r(\text{calc})$ : 1298.7082

Fixed modifications: Carbamidomethyl (C) (apply to specified residues or termini only)

Variable modifications:

N-term : Acetyl (Protein N-term)

Ions Score: 67 Expect: 1.3e-05

Matches : 24/94 fragment ions using 30 most intense peaks ([help](#))

| #  | b                | b <sup>++</sup> | b <sup>0</sup>   | b <sup>0++</sup> | Seq. | y               | y <sup>++</sup> | y*              | y <sup>*++</sup> | y <sup>0</sup>   | y <sup>0++</sup> | #  |
|----|------------------|-----------------|------------------|------------------|------|-----------------|-----------------|-----------------|------------------|------------------|------------------|----|
| 1  | 130.0499         | 65.5286         | 112.0393         | 56.5233          | S    |                 |                 |                 |                  |                  |                  | 11 |
| 2  | <b>243.1339</b>  | 122.0706        | <b>225.1234</b>  | 113.0653         | L    | 1170.6729       | 585.8401        | 1153.6463       | 577.3268         | 1152.6623        | 576.8348         | 10 |
| 3  | <b>356.2180</b>  | 178.6126        | 338.2074         | 169.6074         | L    | 1057.5888       | 529.2980        | 1040.5623       | 520.7848         | <b>1039.5782</b> | 520.2928         | 9  |
| 4  | <b>457.2657</b>  | 229.1365        | <b>439.2551</b>  | 220.1312         | T    | <b>944.5047</b> | 472.7560        | <b>927.4782</b> | 464.2427         | <b>926.4942</b>  | 463.7507         | 8  |
| 5  | 586.3083         | 293.6578        | <b>568.2977</b>  | 284.6525         | E    | <b>843.4571</b> | 422.2322        | 826.4305        | 413.7189         | <b>825.4465</b>  | 413.2269         | 7  |
| 6  | <b>685.3767</b>  | 343.1920        | 667.3661         | 334.1867         | V    | <b>714.4145</b> | 357.7109        | 697.3879        | 349.1976         | <b>696.4039</b>  | 348.7056         | 6  |
| 7  | <b>814.4193</b>  | 407.7133        | 796.4087         | 398.7080         | E    | <b>615.3461</b> | 308.1767        | 598.3195        | 299.6634         | <b>597.3355</b>  | 299.1714         | 5  |
| 8  | <b>915.4670</b>  | 458.2371        | 897.4564         | 449.2318         | T    | <b>486.3035</b> | 243.6554        | 469.2769        | 235.1421         | 468.2929         | 234.6501         | 4  |
| 9  | 1012.5197        | 506.7635        | 994.5092         | 497.7582         | P    | <b>385.2558</b> | 193.1315        | 368.2292        | 184.6183         |                  |                  | 3  |
| 10 | <b>1125.6038</b> | 563.3055        | <b>1107.5932</b> | 554.3002         | I    | <b>288.2030</b> | 144.6051        | 271.1765        | 136.0919         |                  |                  | 2  |
| 11 |                  |                 |                  |                  | R    | 175.1190        | 88.0631         | 158.0924        | 79.5498          |                  |                  | 1  |

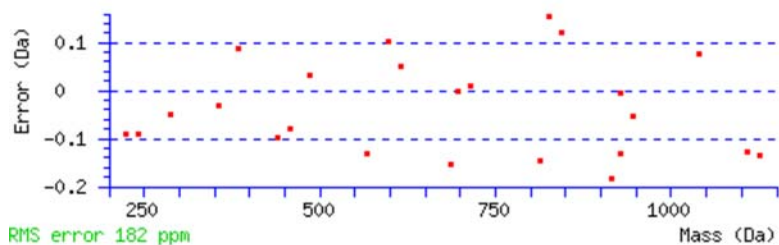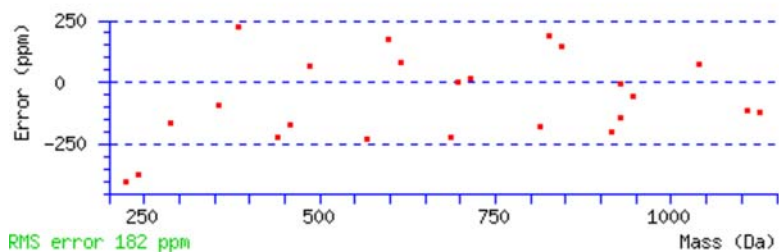

NCBI **BLAST** search of [SLLTEVETPIR](#)

(Parameters: blastp, nr protein database, expect=20000, no filter, PAM30)

Other BLAST [web gateways](#)

#### All matches to this query

| Score | Mr(calc): | Delta   | Sequence                      |
|-------|-----------|---------|-------------------------------|
| 67.4  | 1298.7082 | -0.0007 | <a href="#">SLLTEVETPIR</a>   |
| 14.2  | 1297.6990 | 1.0085  | <a href="#">LENKKPNLEGR</a>   |
| 11.4  | 1297.7241 | 0.9834  | <a href="#">DNAALKVTL PQK</a> |
| 10.7  | 1297.6990 | 1.0085  | <a href="#">TGTLTSDHLVVR</a>  |
| 9.8   | 1298.6904 | 0.0171  | <a href="#">MLIQDIPSIPR</a>   |
| 8.9   | 1298.6942 | 0.0133  | <a href="#">IQENVRNAIGGK</a>  |
| 8.7   | 1298.6830 | 0.0245  | <a href="#">LENKKPNLEGR</a>   |
| 8.2   | 1297.7159 | 0.9916  | <a href="#">RTLSFQLILK</a>    |
| 8.2   | 1297.7159 | 0.9916  | <a href="#">RTLSFQLILK</a>    |
| 7.5   | 1298.6999 | 0.0076  | <a href="#">RTLSFQLILK</a>    |

Mascot: <http://www.matrixscience.com/>

# MASCOT SCIENCE Mascot Search Results

## Peptide View

MS/MS Fragmentation of **MDPNTVSSFQDILLR**

Found in **NEP**, NIB74xp

Match to Query 2176: 1776.870336 from(889.442444,2+) intensity(9877.0771)

Title: B120210\_005.05387.05387.2

Data file B120210\_005.mgf.mascot

Click mouse within plot area to zoom in by factor of two about that point

Or, Plot from  to  Da

Label all possible matches  Label matches used for scoring

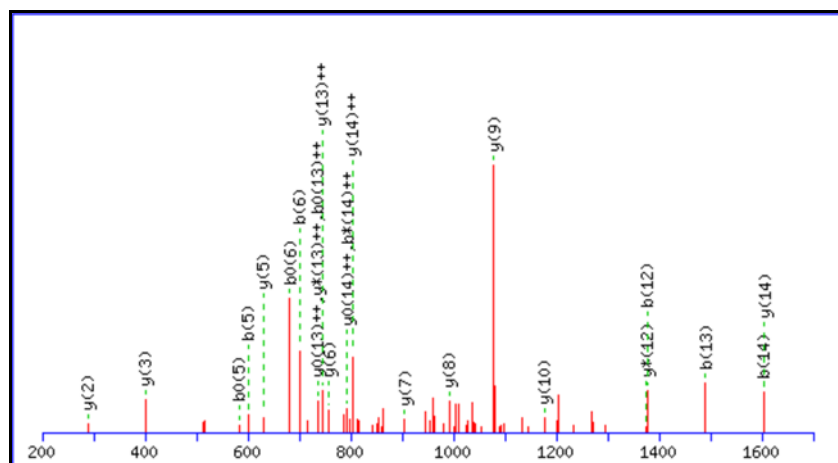

Monoisotopic mass of neutral peptide  $M_r(\text{calc})$ : 1776.8716

Fixed modifications: Carbamidomethyl (C) (apply to specified residues or termini only)

Variable modifications:

N-term : Acetyl (Protein N-term)

Ions Score: 51 Expect: 0.0015

Matches : 24/152 fragment ions using 39 most intense peaks ([help](#))

| #  | b         | b <sup>++</sup> | b*        | b <sup>*++</sup> | b <sup>0</sup> | b <sup>0++</sup> | Seq. | y         | y <sup>++</sup> | y*        | y <sup>*++</sup> | y <sup>0</sup> | y <sup>0++</sup> | #  |
|----|-----------|-----------------|-----------|------------------|----------------|------------------|------|-----------|-----------------|-----------|------------------|----------------|------------------|----|
| 1  | 174.0583  | 87.5328         |           |                  |                |                  | M    |           |                 |           |                  |                |                  | 15 |
| 2  | 289.0853  | 145.0463        |           |                  | 271.0747       | 136.0410         | D    | 1604.8279 | 802.9176        | 1587.8013 | 794.4043         | 1586.8173      | 793.9123         | 14 |
| 3  | 386.1380  | 193.5727        |           |                  | 368.1275       | 184.5674         | P    | 1489.8009 | 745.4041        | 1472.7744 | 736.8908         | 1471.7904      | 736.3988         | 13 |
| 4  | 500.1810  | 250.5941        | 483.1544  | 242.0808         | 482.1704       | 241.5888         | N    | 1392.7482 | 696.8777        | 1375.7216 | 688.3644         | 1374.7376      | 687.8724         | 12 |
| 5  | 601.2286  | 301.1180        | 584.2021  | 292.6047         | 583.2181       | 292.1127         | T    | 1278.7052 | 639.8563        | 1261.6787 | 631.3430         | 1260.6947      | 630.8510         | 11 |
| 6  | 700.2971  | 350.6522        | 683.2705  | 342.1389         | 682.2865       | 341.6469         | V    | 1177.6575 | 589.3324        | 1160.6310 | 580.8191         | 1159.6470      | 580.3271         | 10 |
| 7  | 787.3291  | 394.1682        | 770.3025  | 385.6549         | 769.3185       | 385.1629         | S    | 1078.5891 | 539.7982        | 1061.5626 | 531.2849         | 1060.5786      | 530.7929         | 9  |
| 8  | 874.3611  | 437.6842        | 857.3346  | 429.1709         | 856.3505       | 428.6789         | S    | 991.5571  | 496.2822        | 974.5306  | 487.7689         | 973.5465       | 487.2769         | 8  |
| 9  | 1021.4295 | 511.2184        | 1004.4030 | 502.7051         | 1003.4190      | 502.2131         | F    | 904.5251  | 452.7662        | 887.4985  | 444.2529         | 886.5145       | 443.7609         | 7  |
| 10 | 1149.4881 | 575.2477        | 1132.4616 | 566.7344         | 1131.4775      | 566.2424         | Q    | 757.4567  | 379.2320        | 740.4301  | 370.7187         | 739.4461       | 370.2267         | 6  |
| 11 | 1264.5150 | 632.7612        | 1247.4885 | 624.2479         | 1246.5045      | 623.7559         | D    | 629.3981  | 315.2027        | 612.3715  | 306.6894         | 611.3875       | 306.1974         | 5  |
| 12 | 1377.5991 | 689.3032        | 1360.5726 | 680.7899         | 1359.5885      | 680.2979         | I    | 514.3711  | 257.6892        | 497.3446  | 249.1759         |                |                  | 4  |
| 13 | 1490.6832 | 745.8452        | 1473.6566 | 737.3319         | 1472.6726      | 736.8399         | L    | 401.2871  | 201.1472        | 384.2605  | 192.6339         |                |                  | 3  |
| 14 | 1603.7672 | 802.3873        | 1586.7407 | 793.8740         | 1585.7567      | 793.3820         | L    | 288.2030  | 144.6051        | 271.1765  | 136.0919         |                |                  | 2  |
| 15 |           |                 |           |                  |                |                  | R    | 175.1190  | 88.0631         | 158.0924  | 79.5498          |                |                  | 1  |

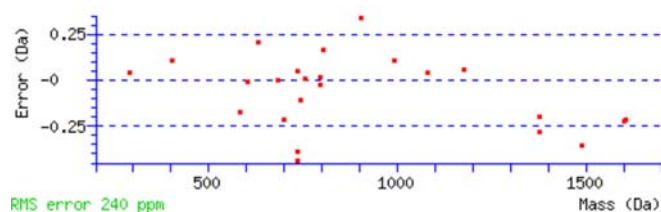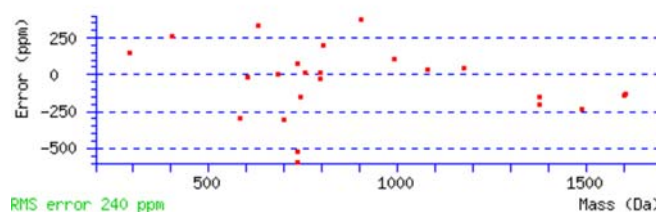

NCBI BLAST search of **MDPNTVSSFQDILLR**

(Parameters: blastp, nr protein database, expect=20000, no filter, PAM30)

Other BLAST [web gateways](#)

**All matches to this query**

| Score | Mr(calc): | Delta   | Sequence                          |
|-------|-----------|---------|-----------------------------------|
| 50.7  | 1776.8716 | -0.0013 | <a href="#">MDPNTVSSFQDILLR</a>   |
| 19.3  | 1776.8795 | -0.0091 | <a href="#">WNSNNVAAGYDIALLR</a>  |
| 19.3  | 1776.8795 | -0.0091 | <a href="#">WNSNNVAAGYDIALLR</a>  |
| 19.3  | 1776.8795 | -0.0091 | <a href="#">WNSNNVAAGYDIALLR</a>  |
| 18.4  | 1776.8894 | -0.0190 | <a href="#">VGDQSLAYIAQGLDGLR</a> |
| 16.3  | 1776.8885 | -0.0182 | <a href="#">RMLELGLVKNLTYF</a>    |
| 16.3  | 1776.8885 | -0.0182 | <a href="#">RMLELGLVKNLTYF</a>    |
| 10.9  | 1776.8771 | -0.0068 | <a href="#">NDIGVTVHELSTTKK</a>   |
| 10.0  | 1776.8771 | -0.0068 | <a href="#">NDIGVTVHELSTTKK</a>   |
| 9.9   | 1776.8957 | -0.0254 | <a href="#">MARPOLQDVLSKLR</a>    |

Mascot: <http://www.matrixscience.com/>

# Mascot Search Results

## Peptide View

MS/MS Fragmentation of **DPNTVSSFQDILLR**

Found in **NEP**, NIB74xp

Match to Query 2110: 1603.793310 from(802.903931,2+) intensity(78360.8000)

Title: B111206\_005.03908.03908.2

Data file B111206\_005.mgf.mascot

Click mouse within plot area to zoom in by factor of two about that point

Or, Plot from  to  Da

Label all possible matches  Label matches used for scoring

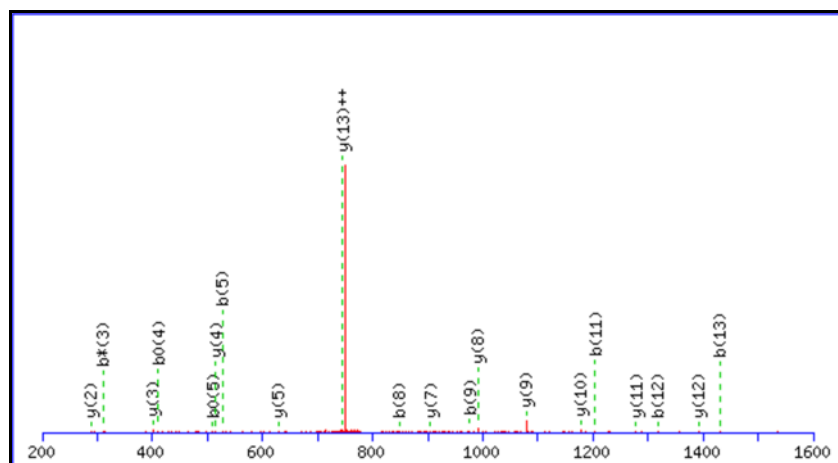

Monoisotopic mass of neutral peptide  $M_r(\text{calc})$ : 1603.8206

Fixed modifications: Carbamidomethyl (C) (apply to specified residues or termini only)

Ions Score: 43 Expect: 0.0071

Matches : 20/144 fragment ions using 47 most intense peaks ([help](#))

| #  | b         | b <sup>++</sup> | b*        | b <sup>*++</sup> | b <sup>0</sup> | b <sup>0++</sup> | Seq. | y         | y <sup>++</sup> | y*        | y <sup>*++</sup> | y <sup>0</sup> | y <sup>0++</sup> | #  |
|----|-----------|-----------------|-----------|------------------|----------------|------------------|------|-----------|-----------------|-----------|------------------|----------------|------------------|----|
| 1  | 116.0342  | 58.5207         |           |                  | 98.0237        | 49.5155          | D    |           |                 |           |                  |                |                  | 14 |
| 2  | 213.0870  | 107.0471        |           |                  | 195.0764       | 98.0418          | P    | 1489.8009 | 745.4041        | 1472.7744 | 736.8908         | 1471.7904      | 736.3988         | 13 |
| 3  | 327.1299  | 164.0686        | 310.1034  | 155.5553         | 309.1193       | 155.0633         | N    | 1392.7482 | 696.8777        | 1375.7216 | 688.3644         | 1374.7376      | 687.8724         | 12 |
| 4  | 428.1776  | 214.5924        | 411.1510  | 206.0792         | 410.1670       | 205.5872         | T    | 1278.7052 | 639.8563        | 1261.6787 | 631.3430         | 1260.6947      | 630.8510         | 11 |
| 5  | 527.2460  | 264.1266        | 510.2195  | 255.6134         | 509.2354       | 255.1214         | V    | 1177.6575 | 589.3324        | 1160.6310 | 580.8191         | 1159.6470      | 580.3271         | 10 |
| 6  | 614.2780  | 307.6427        | 597.2515  | 299.1294         | 596.2675       | 298.6374         | S    | 1078.5891 | 539.7982        | 1061.5626 | 531.2849         | 1060.5786      | 530.7929         | 9  |
| 7  | 701.3101  | 351.1587        | 684.2835  | 342.6454         | 683.2995       | 342.1534         | S    | 991.5571  | 496.2822        | 974.5306  | 487.7689         | 973.5465       | 487.2769         | 8  |
| 8  | 848.3785  | 424.6929        | 831.3519  | 416.1796         | 830.3679       | 415.6876         | F    | 904.5251  | 452.7662        | 887.4985  | 444.2529         | 886.5145       | 443.7609         | 7  |
| 9  | 976.4371  | 488.7222        | 959.4105  | 480.2089         | 958.4265       | 479.7169         | Q    | 757.4567  | 379.2320        | 740.4301  | 370.7187         | 739.4461       | 370.2267         | 6  |
| 10 | 1091.4640 | 546.2356        | 1074.4374 | 537.7224         | 1073.4534      | 537.2304         | D    | 629.3981  | 315.2027        | 612.3715  | 306.6894         | 611.3875       | 306.1974         | 5  |
| 11 | 1204.5481 | 602.7777        | 1187.5215 | 594.2644         | 1186.5375      | 593.7724         | I    | 514.3711  | 257.6892        | 497.3446  | 249.1759         |                |                  | 4  |
| 12 | 1317.6321 | 659.3197        | 1300.6056 | 650.8064         | 1299.6216      | 650.3144         | L    | 401.2871  | 201.1472        | 384.2605  | 192.6339         |                |                  | 3  |
| 13 | 1430.7162 | 715.8617        | 1413.6896 | 707.3485         | 1412.7056      | 706.8564         | L    | 288.2030  | 144.6051        | 271.1765  | 136.0919         |                |                  | 2  |
| 14 |           |                 |           |                  |                |                  | R    | 175.1190  | 88.0631         | 158.0924  | 79.5498          |                |                  | 1  |

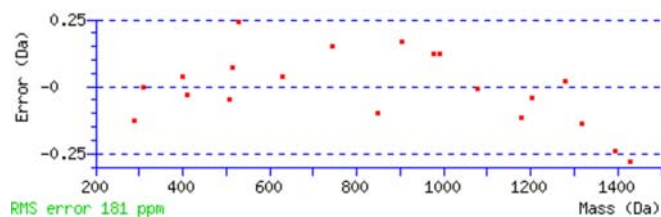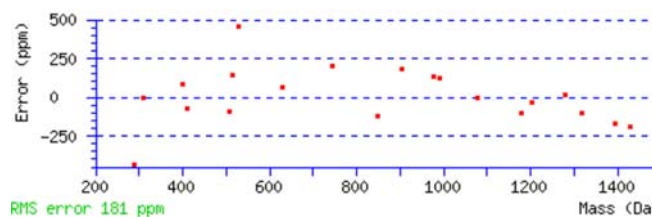

NCBI BLAST search of **DPNTVSSFQDILLR**

(Parameters: blastp, nr protein database, expect=20000, no filter, PAM30)

Other BLAST [web gateways](#)

All matches to this query

| Score | Mr(calc): | Delta   | Sequence                       |
|-------|-----------|---------|--------------------------------|
| 43.3  | 1603.8206 | -0.0273 | <a href="#">DPNTVSSFQDILLR</a> |
| 19.2  | 1603.7831 | 0.0102  | <a href="#">RALGASNTSHELLR</a> |
| 12.7  | 1603.8127 | -0.0194 | <a href="#">SMAEQIEADVILLR</a> |
| 11.6  | 1603.8206 | -0.0273 | <a href="#">SSLVQPGFLADLNR</a> |
| 8.6   | 1603.7793 | 0.0140  | <a href="#">KQLTRMLSDFLR</a>   |
| 7.5   | 1603.7745 | 0.0188  | <a href="#">MMQVMPGDVRRPR</a>  |
| 7.5   | 1603.7745 | 0.0188  | <a href="#">MMQVMPGDVRRPR</a>  |
| 7.5   | 1603.7745 | 0.0188  | <a href="#">MMQVMPGDVRRPR</a>  |
| 7.5   | 1601.7619 | 2.0314  | <a href="#">FTKSKTVYSILR</a>   |
| 7.5   | 1601.7619 | 2.0314  | <a href="#">FTKSKTVYSILR</a>   |

Mascot: <http://www.matrixscience.com/>

**NIB74xp (MDCK-grown)**  
**N-terminal peptide spectra**

**Mascot Search Results**

**Peptide View**

MS/MS Fragmentation of **MDVNPTLLFLK**  
 Found in **PBI**, NIB74xp user\_supplied\_sequence

Match to Query 1630: 1331.715916 from(666.865234,2+) intensity(174472.0000)  
 Title: B120210\_001.06461.06461.2  
 Data file B120210\_001.mgf.mascot

Click mouse within plot area to zoom in by factor of two about that point

Or, Plot from  to  Da   
 Label all possible matches  Label matches used for scoring

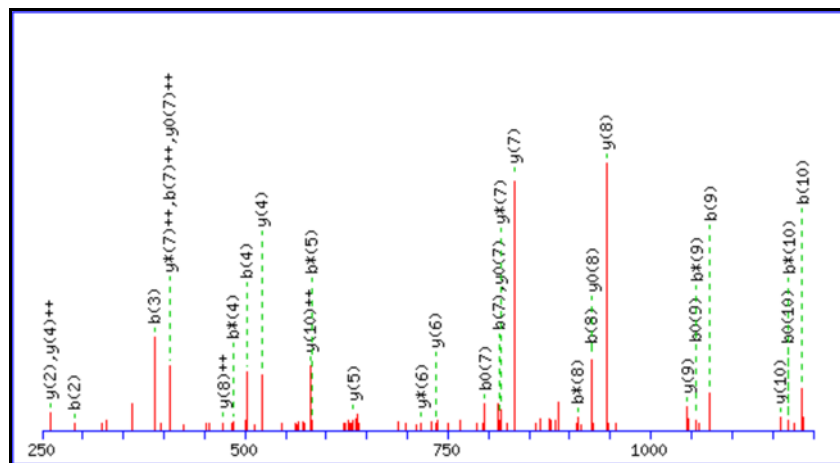

Monoisotopic mass of neutral peptide **Mr(calc):** 1331.7159  
**Fixed modifications:** Carbamidomethyl (C) (apply to specified residues or termini only)  
**Variable modifications:**  
**N-term :** Acetyl (Protein N-term)  
**Ions Score:** 57 **Expect:** 0.00033  
**Matches :** 34/102 fragment ions using 53 most intense peaks ([help](#))

| #  | b                | b <sup>++</sup> | b*               | b* <sup>++</sup> | b <sup>0</sup>   | b <sup>0++</sup> | Seq. | y                | y <sup>++</sup> | y*              | y* <sup>++</sup> | y <sup>0</sup>  | y <sup>0++</sup> | #  |
|----|------------------|-----------------|------------------|------------------|------------------|------------------|------|------------------|-----------------|-----------------|------------------|-----------------|------------------|----|
| 1  | 174.0583         | 87.5328         |                  |                  |                  |                  | M    |                  |                 |                 |                  |                 |                  | 11 |
| 2  | <b>289.0853</b>  | 145.0463        |                  |                  | 271.0747         | 136.0410         | D    | <b>1159.6721</b> | <b>580.3397</b> | 1142.6456       | 571.8264         | 1141.6616       | 571.3344         | 10 |
| 3  | <b>388.1537</b>  | 194.5805        |                  |                  | 370.1431         | 185.5752         | V    | <b>1044.6452</b> | 522.8262        | 1027.6186       | 514.3130         | 1026.6346       | 513.8210         | 9  |
| 4  | <b>502.1966</b>  | 251.6019        | <b>485.1701</b>  | 243.0887         | 484.1860         | 242.5967         | N    | <b>945.5768</b>  | <b>473.2920</b> | 928.5502        | 464.7788         | <b>927.5662</b> | 464.2867         | 8  |
| 5  | 599.2494         | 300.1283        | <b>582.2228</b>  | 291.6151         | 581.2388         | 291.1230         | P    | <b>831.5339</b>  | 416.2706        | <b>814.5073</b> | <b>407.7573</b>  | <b>813.5233</b> | <b>407.2653</b>  | 7  |
| 6  | 700.2971         | 350.6522        | 683.2705         | 342.1389         | 682.2865         | 341.6469         | T    | <b>734.4811</b>  | 367.7442        | <b>717.4545</b> | 359.2309         | 716.4705        | 358.7389         | 6  |
| 7  | <b>813.3811</b>  | <b>407.1942</b> | 796.3546         | 398.6809         | <b>795.3706</b>  | 398.1889         | L    | <b>633.4334</b>  | 317.2203        | 616.4069        | 308.7071         |                 |                  | 5  |
| 8  | <b>926.4652</b>  | 463.7362        | <b>909.4386</b>  | 455.2230         | 908.4546         | 454.7309         | L    | <b>520.3493</b>  | <b>260.6783</b> | 503.3228        | 252.1650         |                 |                  | 4  |
| 9  | <b>1073.5336</b> | 537.2704        | <b>1056.5070</b> | 528.7572         | <b>1055.5230</b> | 528.2652         | F    | <b>407.2653</b>  | 204.1363        | 390.2387        | 195.6230         |                 |                  | 3  |
| 10 | <b>1186.6177</b> | 593.8125        | <b>1169.5911</b> | 585.2992         | <b>1168.6071</b> | 584.8072         | L    | <b>260.1969</b>  | 130.6021        | 243.1703        | 122.0888         |                 |                  | 2  |
| 11 |                  |                 |                  |                  |                  |                  | K    | 147.1128         | 74.0600         | 130.0863        | 65.5468          |                 |                  | 1  |

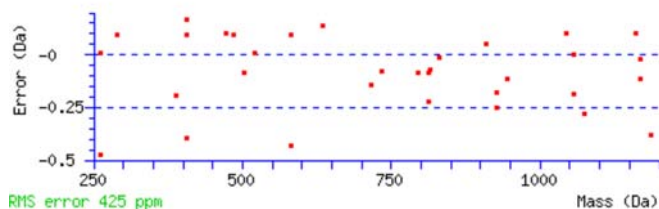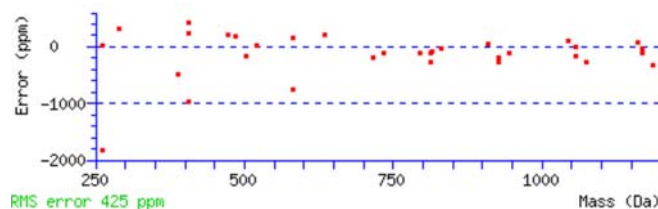

NCBI **BLAST** search of **MDVNPTLLFLK**  
 (Parameters: blastp, nr protein database, expect=20000, no filter, PAM30)  
 Other BLAST [web gateways](#)

**All matches to this query**

| Score | Mr(calc): | Delta | Sequence |
|-------|-----------|-------|----------|
|-------|-----------|-------|----------|



|      |           |         |                               |
|------|-----------|---------|-------------------------------|
| 56.9 | 1331.7159 | 0.0000  | <a href="#">MDVNPTLLFLK</a>   |
| 19.2 | 1331.6973 | 0.0186  | <a href="#">EFQPTLDLGAIK</a>  |
| 16.4 | 1331.7231 | -0.0072 | <a href="#">IRIDVNSMQIK</a>   |
| 14.6 | 1331.7118 | 0.0041  | <a href="#">QILMENAELKK</a>   |
| 14.5 | 1331.6924 | 0.0235  | <a href="#">VTIMGIYSIKK</a>   |
| 14.3 | 1331.7118 | 0.0041  | <a href="#">MTVNEAKEKLK</a>   |
| 12.8 | 1331.6924 | 0.0235  | <a href="#">VTIMGIYSIKK</a>   |
| 9.5  | 1331.7271 | -0.0112 | <a href="#">IWEKMQEKIK</a>    |
| 9.1  | 1331.6932 | 0.0227  | <a href="#">STGLQAEADAKIK</a> |
| 8.1  | 1331.6962 | 0.0197  | <a href="#">RHKLESELIK</a>    |

Mascot: <http://www.matrixscience.com/>

# MASCOT SCIENCE Mascot Search Results

## Peptide View

MS/MS Fragmentation of **ASQGTKR**

Found in **NP**, NIB74xp user\_supplied\_sequence

Match to Query 132: 788.413732 from(395.214142,2+) intensity(8934.5273)

Title: B120210\_001.00445.00445.2

Data file B120210\_001.mgf.mascot

Click mouse within plot area to zoom in by factor of two about that point

Or, Plot from  to  Da

Label all possible matches  Label matches used for scoring

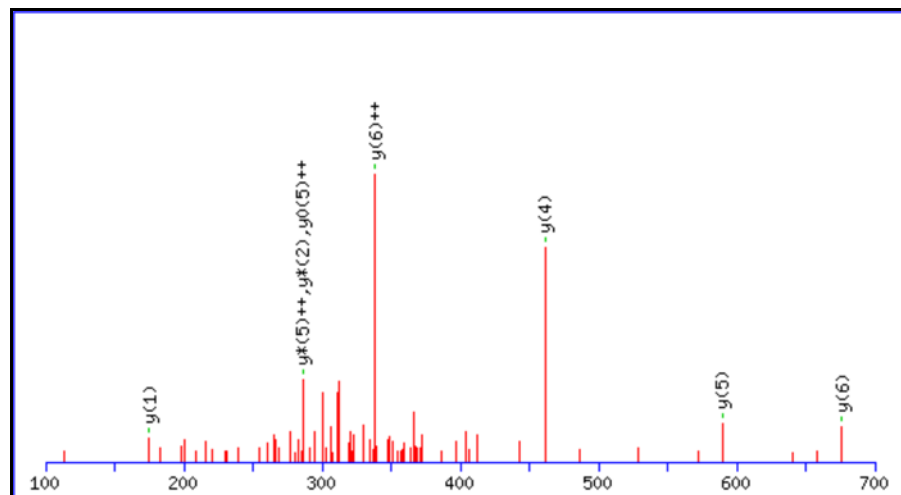

Monoisotopic mass of neutral peptide  $M_r(\text{calc})$ : 788.4140

Fixed modifications: Carbamidomethyl (C) (apply to specified residues or termini only)

Variable modifications:

N-term : Acetyl (Protein N-term)

Ions Score: 35 Expect: 0.039

Matches : 8/62 fragment ions using 6 most intense peaks ([help](#))

| # | b        | b <sup>++</sup> | b*       | b <sup>*++</sup> | b <sup>0</sup> | b <sup>0++</sup> | Seq. | y        | y <sup>++</sup> | y*       | y <sup>*++</sup> | y <sup>0</sup> | y <sup>0++</sup> | # |
|---|----------|-----------------|----------|------------------|----------------|------------------|------|----------|-----------------|----------|------------------|----------------|------------------|---|
| 1 | 114.0550 | 57.5311         |          |                  |                |                  | A    |          |                 |          |                  |                |                  | 7 |
| 2 | 201.0870 | 101.0471        |          |                  | 183.0764       | 92.0418          | S    | 676.3737 | 338.6905        | 659.3471 | 330.1772         | 658.3631       | 329.6852         | 6 |
| 3 | 329.1456 | 165.0764        | 312.1190 | 156.5631         | 311.1350       | 156.0711         | Q    | 589.3416 | 295.1745        | 572.3151 | 286.6612         | 571.3311       | 286.1692         | 5 |
| 4 | 386.1670 | 193.5872        | 369.1405 | 185.0739         | 368.1565       | 184.5819         | G    | 461.2831 | 231.1452        | 444.2565 | 222.6319         | 443.2725       | 222.1399         | 4 |
| 5 | 487.2147 | 244.1110        | 470.1882 | 235.5977         | 469.2041       | 235.1057         | T    | 404.2616 | 202.6344        | 387.2350 | 194.1212         | 386.2510       | 193.6292         | 3 |
| 6 | 615.3097 | 308.1585        | 598.2831 | 299.6452         | 597.2991       | 299.1532         | K    | 303.2139 | 152.1106        | 286.1874 | 143.5973         |                |                  | 2 |
| 7 |          |                 |          |                  |                |                  | R    | 175.1190 | 88.0631         | 158.0924 | 79.5498          |                |                  | 1 |

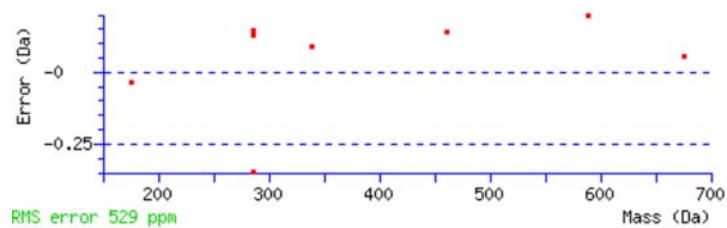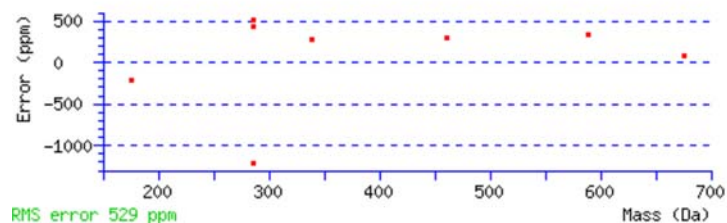

NCBI **BLAST** search of [ASQGTKR](#)

(Parameters: blastp, nr protein database, expect=20000, no filter, PAM30)

Other BLAST [web gateways](#)

**All matches to this query**

| Score | Mr(calc): | Delta   | Sequence                |
|-------|-----------|---------|-------------------------|
| 34.6  | 788.4140  | -0.0003 | <a href="#">ASQGTKR</a> |
| 18.3  | 788.4028  | 0.0109  | <a href="#">ISDAIDR</a> |
| 18.3  | 788.4140  | -0.0003 | <a href="#">ISERQR</a>  |
| 18.3  | 788.4181  | -0.0043 | <a href="#">ISWNLR</a>  |
| 18.3  | 788.4028  | 0.0109  | <a href="#">LSDADLR</a> |
| 18.3  | 788.4140  | -0.0003 | <a href="#">LSEQRR</a>  |
| 18.3  | 788.4140  | -0.0003 | <a href="#">LSERER</a>  |
| 18.3  | 788.4181  | -0.0043 | <a href="#">LSIDWR</a>  |
| 18.3  | 788.4181  | -0.0043 | <a href="#">LSLNWR</a>  |
| 18.3  | 788.4028  | 0.0109  | <a href="#">LSNIADR</a> |

**Mascot:** <http://www.matrixscience.com/>

**MATRIX SCIENCE Mascot Search Results**

**Peptide View**

MS/MS Fragmentation of **SLLTEVETYVLSIIPSGPLK**

Found in **M1**, NIB74xp user\_supplied\_sequence

Match to Query 3311: 2158.216160 from(1080.115356,2+) intensity(46216.4688)

Title: B120210\_001.07238.07238.2

Data file B120210\_001.mgf.mascot

Click mouse within plot area to zoom in by factor of two about that point

Or, Plot from  to  Da

Label all possible matches  Label matches used for scoring

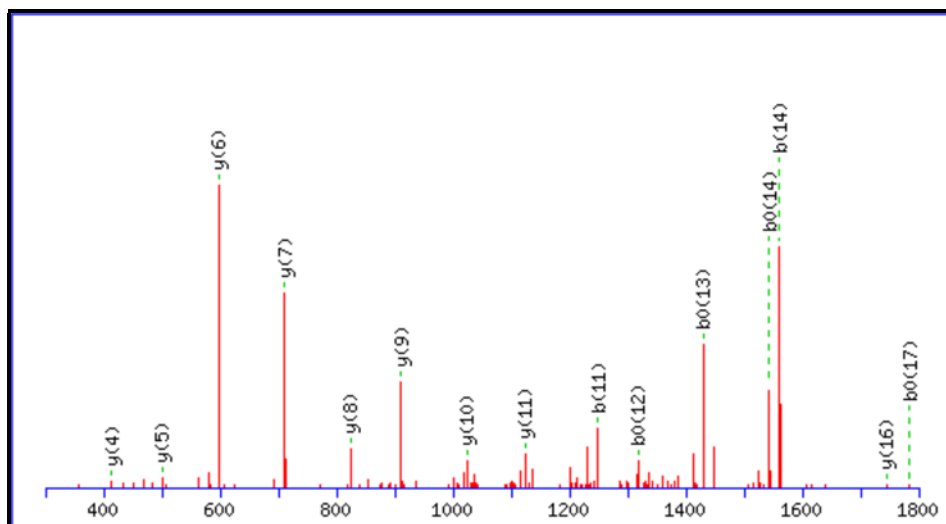

**Monoisotopic mass of neutral peptide Mr(calc):** 2158.2137

**Fixed modifications:** Carbamidomethyl (C) (apply to specified residues or termini only)

**Ions Score:** 89 **Expect:** 1.4e-08

**Matches :** 15/182 fragment ions using 15 most intense peaks ([help](#))

| #  | b                | b <sup>++</sup> | b <sup>0</sup>   | b <sup>0++</sup> | Seq. | y                | y <sup>++</sup> | y*        | y <sup>*++</sup> | y <sup>0</sup> | y <sup>0++</sup> | #  |
|----|------------------|-----------------|------------------|------------------|------|------------------|-----------------|-----------|------------------|----------------|------------------|----|
| 1  | 88.0393          | 44.5233         | 70.0287          | 35.5180          | S    |                  |                 |           |                  |                |                  | 20 |
| 2  | 201.1234         | 101.0653        | 183.1128         | 92.0600          | L    | 2072.1889        | 1036.5981       | 2055.1624 | 1028.0848        | 2054.1784      | 1027.5928        | 19 |
| 3  | 314.2074         | 157.6074        | 296.1969         | 148.6021         | L    | 1959.1049        | 980.0561        | 1942.0783 | 971.5428         | 1941.0943      | 971.0508         | 18 |
| 4  | 415.2551         | 208.1312        | 397.2445         | 199.1259         | T    | 1846.0208        | 923.5140        | 1828.9943 | 915.0008         | 1828.0102      | 914.5088         | 17 |
| 5  | 544.2977         | 272.6525        | 526.2871         | 263.6472         | E    | <b>1744.9731</b> | 872.9902        | 1727.9466 | 864.4769         | 1726.9626      | 863.9849         | 16 |
| 6  | 643.3661         | 322.1867        | 625.3556         | 313.1814         | V    | 1615.9305        | 808.4689        | 1598.9040 | 799.9556         | 1597.9200      | 799.4636         | 15 |
| 7  | 772.4087         | 386.7080        | 754.3981         | 377.7027         | E    | 1516.8621        | 758.9347        | 1499.8356 | 750.4214         | 1498.8516      | 749.9294         | 14 |
| 8  | 873.4564         | 437.2318        | 855.4458         | 428.2266         | T    | 1387.8195        | 694.4134        | 1370.7930 | 685.9001         | 1369.8090      | 685.4081         | 13 |
| 9  | 1036.5197        | 518.7635        | 1018.5092        | 509.7582         | Y    | 1286.7719        | 643.8896        | 1269.7453 | 635.3763         | 1268.7613      | 634.8843         | 12 |
| 10 | 1135.5881        | 568.2977        | 1117.5776        | 559.2924         | V    | <b>1123.7085</b> | 562.3579        | 1106.6820 | 553.8446         | 1105.6980      | 553.3526         | 11 |
| 11 | <b>1248.6722</b> | 624.8397        | 1230.6616        | 615.8345         | L    | <b>1024.6401</b> | 512.8237        | 1007.6136 | 504.3104         | 1006.6295      | 503.8184         | 10 |
| 12 | 1335.7042        | 668.3558        | <b>1317.6937</b> | 659.3505         | S    | <b>911.5560</b>  | 456.2817        | 894.5295  | 447.7684         | 893.5455       | 447.2764         | 9  |
| 13 | 1448.7883        | 724.8978        | <b>1430.7777</b> | 715.8925         | I    | <b>824.5240</b>  | 412.7656        | 807.4975  | 404.2524         | 806.5135       | 403.7604         | 8  |
| 14 | <b>1561.8724</b> | 781.4398        | <b>1543.8618</b> | 772.4345         | I    | <b>711.4400</b>  | 356.2236        | 694.4134  | 347.7103         | 693.4294       | 347.2183         | 7  |
| 15 | 1658.9251        | 829.9662        | 1640.9146        | 820.9609         | P    | <b>598.3559</b>  | 299.6816        | 581.3293  | 291.1683         | 580.3453       | 290.6763         | 6  |
| 16 | 1745.9571        | 873.4822        | 1727.9466        | 864.4769         | S    | <b>501.3031</b>  | 251.1552        | 484.2766  | 242.6419         | 483.2926       | 242.1499         | 5  |
| 17 | 1802.9786        | 901.9929        | <b>1784.9680</b> | 892.9877         | G    | <b>414.2711</b>  | 207.6392        | 397.2445  | 199.1259         |                |                  | 4  |
| 18 | 1900.0314        | 950.5193        | 1882.0208        | 941.5140         | P    | 357.2496         | 179.1285        | 340.2231  | 170.6152         |                |                  | 3  |
| 19 | 2013.1154        | 1007.0614       | 1995.1049        | 998.0561         | L    | 260.1969         | 130.6021        | 243.1703  | 122.0888         |                |                  | 2  |

|    |  |  |  |  |          |          |         |          |         |  |  |          |
|----|--|--|--|--|----------|----------|---------|----------|---------|--|--|----------|
| 20 |  |  |  |  | <b>K</b> | 147.1128 | 74.0600 | 130.0863 | 65.5468 |  |  | <b>1</b> |
|----|--|--|--|--|----------|----------|---------|----------|---------|--|--|----------|

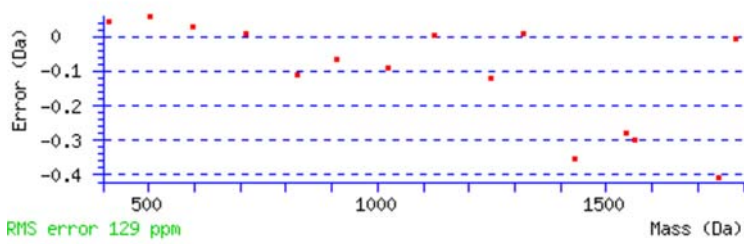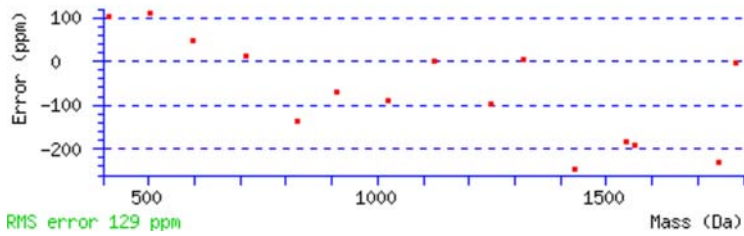

NCBI **BLAST** search of [SLLTEVETYVLSIIPSGPLK](#)  
 (Parameters: blastp, nr protein database, expect=20000, no filter, PAM30)  
 Other BLAST [web gateways](#)

**All matches to this query**

| Score | Mr(calc): | Delta   | Sequence                             |
|-------|-----------|---------|--------------------------------------|
| 89.4  | 2158.2137 | 0.0025  | <a href="#">SLLTEVETYVLSIIPSGPLK</a> |
| 5.3   | 2158.1746 | 0.0416  | <a href="#">DQQILAQLLPLLHGNVNGSK</a> |
| 2.5   | 2156.1720 | 2.0442  | <a href="#">TLKFFQMNPLILLQKK</a>     |
| 2.4   | 2157.1840 | 1.0322  | <a href="#">LTPRVVTKPGHIKPIK</a>     |
| 2.4   | 2157.1979 | 1.0183  | <a href="#">KALSEFGSKIILLKPIIK</a>   |
| 2.3   | 2158.2238 | -0.0077 | <a href="#">EQALKLIQILKGQSLLQR</a>   |
| 2.0   | 2157.2045 | 1.0117  | <a href="#">TPPLATIQKPKASLSQLPVR</a> |
| 2.0   | 2157.2483 | 0.9679  | <a href="#">EMLLKISEITTPGKLFPLK</a>  |
| 1.5   | 2157.1714 | 1.0447  | <a href="#">NAKPVSILRDLITEAMEIK</a>  |
| 1.2   | 2158.1875 | 0.0287  | <a href="#">LCLKRPEQLQEVLDIR</a>     |

**Mascot:** <http://www.matrixscience.com/>

# MASCOT SCIENCE Mascot Search Results

## Peptide View

MS/MS Fragmentation of **SLLTEVETYVLSIIPSGPLK**

Found in **M1**, NIB74xp user\_supplied\_sequence

Match to Query 3370: 2200.225926 from(1101.120239,2+) intensity(423829.9375)

Title: B120210\_001.07245.07245.2

Data file B120210\_001.mgf.mascot

Click mouse within plot area to zoom in by factor of two about that point

Or, Plot from  to  Da

Label all possible matches  Label matches used for scoring

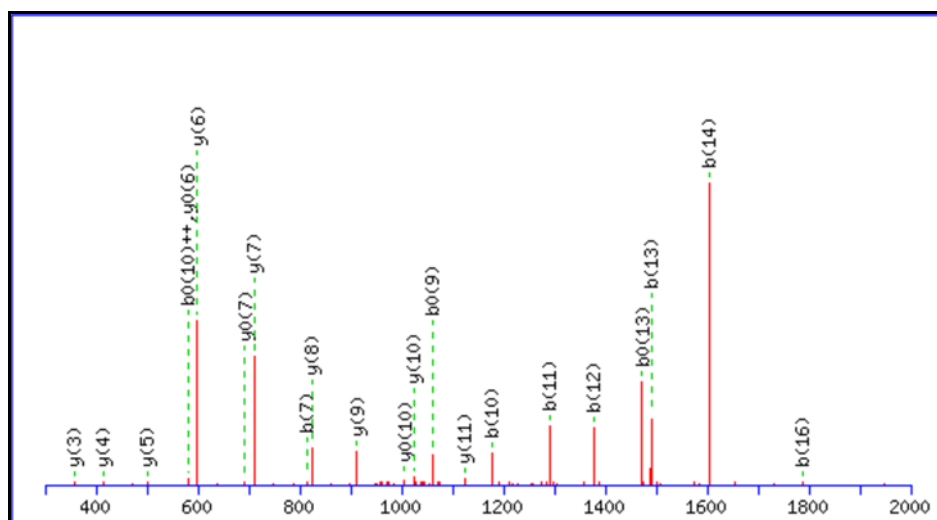

Monoisotopic mass of neutral peptide  $M_r(\text{calc})$ : 2200.2242

Fixed modifications: Carbamidomethyl (C) (apply to specified residues or termini only)

Variable modifications:

N-term : Acetyl (Protein N-term)

Ions Score: 64 Expect: 3e-06

Matches : 22/182 fragment ions using 29 most intense peaks ([help](#))

| #  | b                | b <sup>++</sup> | b <sup>0</sup>   | b <sup>0++</sup> | Seq. | y                | y <sup>++</sup> | y <sup>*</sup> | y <sup>*++</sup> | y <sup>0</sup>   | y <sup>0++</sup> | #  |
|----|------------------|-----------------|------------------|------------------|------|------------------|-----------------|----------------|------------------|------------------|------------------|----|
| 1  | 130.0499         | 65.5286         | 112.0393         | 56.5233          | S    |                  |                 |                |                  |                  |                  | 20 |
| 2  | 243.1339         | 122.0706        | 225.1234         | 113.0653         | L    | 2072.1889        | 1036.5981       | 2055.1624      | 1028.0848        | 2054.1784        | 1027.5928        | 19 |
| 3  | 356.2180         | 178.6126        | 338.2074         | 169.6074         | L    | 1959.1049        | 980.0561        | 1942.0783      | 971.5428         | 1941.0943        | 971.0508         | 18 |
| 4  | 457.2657         | 229.1365        | 439.2551         | 220.1312         | T    | 1846.0208        | 923.5140        | 1828.9943      | 915.0008         | 1828.0102        | 914.5088         | 17 |
| 5  | 586.3083         | 293.6578        | 568.2977         | 284.6525         | E    | 1744.9731        | 872.9902        | 1727.9466      | 864.4769         | 1726.9626        | 863.9849         | 16 |
| 6  | 685.3767         | 343.1920        | 667.3661         | 334.1867         | V    | 1615.9305        | 808.4689        | 1598.9040      | 799.9556         | 1597.9200        | 799.4636         | 15 |
| 7  | <b>814.4193</b>  | 407.7133        | 796.4087         | 398.7080         | E    | 1516.8621        | 758.9347        | 1499.8356      | 750.4214         | 1498.8516        | 749.9294         | 14 |
| 8  | 915.4670         | 458.2371        | 897.4564         | 449.2318         | T    | 1387.8195        | 694.4134        | 1370.7930      | 685.9001         | 1369.8090        | 685.4081         | 13 |
| 9  | 1078.5303        | 539.7688        | <b>1060.5197</b> | 530.7635         | Y    | 1286.7719        | 643.8896        | 1269.7453      | 635.3763         | 1268.7613        | 634.8843         | 12 |
| 10 | <b>1177.5987</b> | 589.3030        | 1159.5881        | <b>580.2977</b>  | V    | <b>1123.7085</b> | 562.3579        | 1106.6820      | 553.8446         | 1105.6980        | 553.3526         | 11 |
| 11 | <b>1290.6828</b> | 645.8450        | 1272.6722        | 636.8397         | L    | <b>1024.6401</b> | 512.8237        | 1007.6136      | 504.3104         | <b>1006.6295</b> | 503.8184         | 10 |
| 12 | <b>1377.7148</b> | 689.3610        | 1359.7042        | 680.3558         | S    | <b>911.5560</b>  | 456.2817        | 894.5295       | 447.7684         | 893.5455         | 447.2764         | 9  |
| 13 | <b>1490.7989</b> | 745.9031        | <b>1472.7883</b> | 736.8978         | I    | <b>824.5240</b>  | 412.7656        | 807.4975       | 404.2524         | 806.5135         | 403.7604         | 8  |
| 14 | <b>1603.8829</b> | 802.4451        | 1585.8724        | 793.4398         | I    | <b>711.4400</b>  | 356.2236        | 694.4134       | 347.7103         | <b>693.4294</b>  | 347.2183         | 7  |
| 15 | 1700.9357        | 850.9715        | 1682.9251        | 841.9662         | P    | <b>598.3559</b>  | 299.6816        | 581.3293       | 291.1683         | <b>580.3453</b>  | 290.6763         | 6  |
| 16 | <b>1787.9677</b> | 894.4875        | 1769.9571        | 885.4822         | S    | <b>501.3031</b>  | 251.1552        | 484.2766       | 242.6419         | 483.2926         | 242.1499         | 5  |
| 17 | 1844.9892        | 922.9982        | 1826.9786        | 913.9929         | G    | <b>414.2711</b>  | 207.6392        | 397.2445       | 199.1259         |                  |                  | 4  |
| 18 | 1942.0419        | 971.5246        | 1924.0314        | 962.5193         | P    | <b>357.2496</b>  | 179.1285        | 340.2231       | 170.6152         |                  |                  | 3  |

|    |           |           |           |           |   |          |          |          |          |  |  |   |
|----|-----------|-----------|-----------|-----------|---|----------|----------|----------|----------|--|--|---|
| 19 | 2055.1260 | 1028.0666 | 2037.1154 | 1019.0614 | L | 260.1969 | 130.6021 | 243.1703 | 122.0888 |  |  | 2 |
| 20 |           |           |           |           | K | 147.1128 | 74.0600  | 130.0863 | 65.5468  |  |  | 1 |

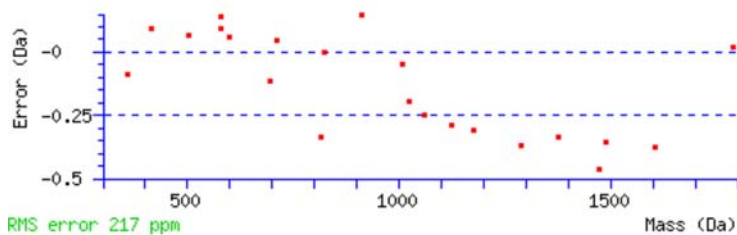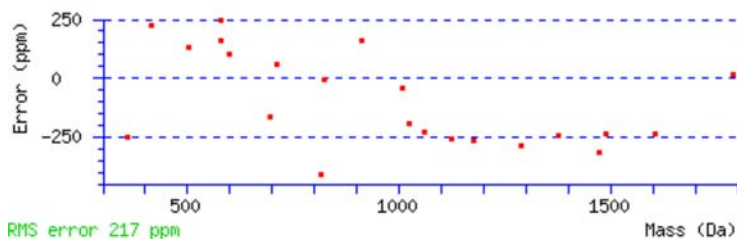

NCBI **BLAST** search of [SLLTEVETYVLSIIPSGPLK](#)

(Parameters: blastp, nr protein database, expect=20000, no filter, PAM30)

Other BLAST [web gateways](#)

#### All matches to this query

| Score | Mr(calc): | Delta   | Sequence                             |
|-------|-----------|---------|--------------------------------------|
| 64.4  | 2200.2242 | 0.0017  | <a href="#">SLLTEVETYVLSIIPSGPLK</a> |
| 5.2   | 2200.2150 | 0.0109  | <a href="#">RSQPQLPQMSVPLVHQVKK</a>  |
| 3.9   | 2200.2078 | 0.0181  | <a href="#">VSQLLVLASLFYFCSDLKR</a>  |
| 3.6   | 2198.2357 | 1.9902  | <a href="#">KLLQMCPAQHGELKHLAK</a>   |
| 3.3   | 2200.1949 | 0.0311  | <a href="#">FLLKLPVDFSNIPYLLK</a>    |
| 2.9   | 2200.2020 | 0.0239  | <a href="#">GFSLGPGRPQAPLNLLIKK</a>  |
| 2.7   | 2200.2458 | -0.0199 | <a href="#">VLSLKALFVALHLLPGMK</a>   |
| 2.5   | 2200.1949 | 0.0311  | <a href="#">FLLKLPVDFSNIPYLLK</a>    |
| 2.1   | 2199.2011 | 1.0248  | <a href="#">LQLLQEDYNRTPAQRLLK</a>   |
| 2.0   | 2200.1964 | 0.0296  | <a href="#">RITRYDAQLILENNSGIPK</a>  |

Mascot: <http://www.matrixscience.com/>



# Mascot Search Results

## Peptide View

MS/MS Fragmentation of **SLLTEVETYVLSIIPSGPLKAEIAQR**

Found in **M1**, NIB74xp user\_supplied\_sequence

Match to Query 4405: 2868.586034 from(1435.300293,2+) intensity(693875.7500)

Title: B120210\_001.07356.07356.2

Data file B120210\_001.mgf.mascot

Click mouse within plot area to zoom in by factor of two about that point

Or, Plot from  to  Da

Label all possible matches  Label matches used for scoring

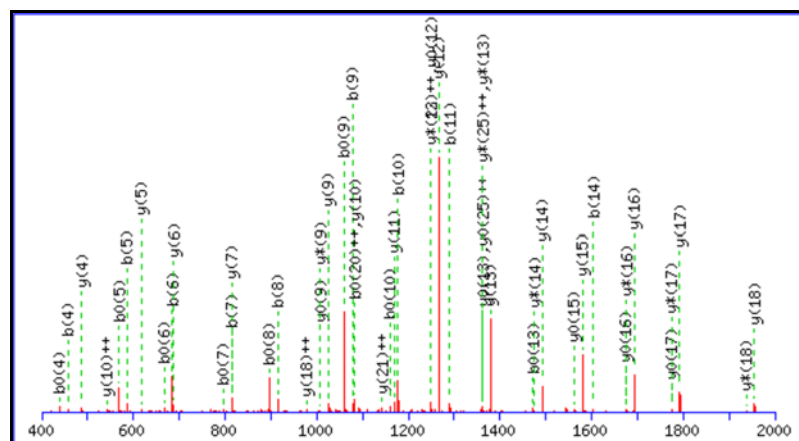

Monoisotopic mass of neutral peptide Mr(calc): 2868.5848

Fixed modifications: Carbamidomethyl (C) (apply to specified residues or termini only)

Variable modifications:

N-term : Acetyl (Protein N-term)

Ions Score: 86 Expect: 1.6e-08

Matches : 53/254 fragment ions using 74 most intense peaks ([help](#))

| #  | b         | b <sup>++</sup> | b <sup>*</sup> | b <sup>*++</sup> | b <sup>0</sup> | b <sup>0++</sup> | Seq. | y         | y <sup>++</sup> | y <sup>*</sup> | y <sup>*++</sup> | y <sup>0</sup> | y <sup>0++</sup> | #  |
|----|-----------|-----------------|----------------|------------------|----------------|------------------|------|-----------|-----------------|----------------|------------------|----------------|------------------|----|
| 1  | 130.0499  | 65.5286         |                |                  | 112.0393       | 56.5233          | S    |           |                 |                |                  |                |                  | 26 |
| 2  | 243.1339  | 122.0706        |                |                  | 225.1234       | 113.0653         | L    | 2740.5495 | 1370.7784       | 2723.5230      | 1362.2651        | 2722.5389      | 1361.7731        | 25 |
| 3  | 356.2180  | 178.6126        |                |                  | 338.2074       | 169.6074         | L    | 2627.4654 | 1314.2364       | 2610.4389      | 1305.7231        | 2609.4549      | 1305.2311        | 24 |
| 4  | 457.2657  | 229.1365        |                |                  | 439.2551       | 220.1312         | T    | 2514.3814 | 1257.6943       | 2497.3548      | 1249.1811        | 2496.3708      | 1248.6890        | 23 |
| 5  | 586.3083  | 293.6578        |                |                  | 568.2977       | 284.6525         | E    | 2413.3337 | 1207.1705       | 2396.3072      | 1198.6572        | 2395.3231      | 1198.1652        | 22 |
| 6  | 685.3767  | 343.1920        |                |                  | 667.3661       | 334.1867         | V    | 2284.2911 | 1142.6492       | 2267.2646      | 1134.1359        | 2266.2805      | 1133.6439        | 21 |
| 7  | 814.4193  | 407.7133        |                |                  | 796.4087       | 398.7080         | E    | 2185.2227 | 1093.1150       | 2168.1961      | 1084.6017        | 2167.2121      | 1084.1097        | 20 |
| 8  | 915.4670  | 458.2371        |                |                  | 897.4564       | 449.2318         | T    | 2056.1801 | 1028.5937       | 2039.1536      | 1020.0804        | 2038.1695      | 1019.5884        | 19 |
| 9  | 1078.5303 | 539.7688        |                |                  | 1060.5197      | 530.7635         | Y    | 1955.1324 | 978.0699        | 1938.1059      | 969.5566         | 1937.1219      | 969.0646         | 18 |
| 10 | 1177.5987 | 589.3030        |                |                  | 1159.5881      | 580.2977         | V    | 1792.0691 | 896.5382        | 1775.0425      | 888.0249         | 1774.0585      | 887.5329         | 17 |
| 11 | 1290.6828 | 645.8450        |                |                  | 1272.6722      | 636.8397         | L    | 1693.0007 | 847.0040        | 1675.9741      | 838.4907         | 1674.9901      | 837.9987         | 16 |
| 12 | 1377.7148 | 689.3610        |                |                  | 1359.7042      | 680.3558         | S    | 1579.9166 | 790.4619        | 1562.8901      | 781.9487         | 1561.9061      | 781.4567         | 15 |
| 13 | 1490.7989 | 745.9031        |                |                  | 1472.7883      | 736.8978         | I    | 1492.8846 | 746.9459        | 1475.8580      | 738.4327         | 1474.8740      | 737.9407         | 14 |
| 14 | 1603.8829 | 802.4451        |                |                  | 1585.8724      | 793.4398         | I    | 1379.8005 | 690.4039        | 1362.7740      | 681.8906         | 1361.7900      | 681.3986         | 13 |
| 15 | 1700.9357 | 850.9715        |                |                  | 1682.9251      | 841.9662         | P    | 1266.7165 | 633.8619        | 1249.6899      | 625.3486         | 1248.7059      | 624.8566         | 12 |
| 16 | 1787.9677 | 894.4875        |                |                  | 1769.9571      | 885.4822         | S    | 1169.6637 | 585.3355        | 1152.6371      | 576.8222         | 1151.6531      | 576.3302         | 11 |
| 17 | 1844.9892 | 922.9982        |                |                  | 1826.9786      | 913.9929         | G    | 1082.6317 | 541.8195        | 1065.6051      | 533.3062         | 1064.6211      | 532.8142         | 10 |
| 18 | 1942.0419 | 971.5246        |                |                  | 1924.0314      | 962.5193         | P    | 1025.6102 | 513.3087        | 1008.5837      | 504.7955         | 1007.5996      | 504.3035         | 9  |
| 19 | 2055.1260 | 1028.0666       |                |                  | 2037.1154      | 1019.0614        | L    | 928.5574  | 464.7824        | 911.5309       | 456.2691         | 910.5469       | 455.7771         | 8  |
| 20 | 2183.2210 | 1092.1141       | 2166.1944      | 1083.6008        | 2165.2104      | 1083.1088        | K    | 815.4734  | 408.2403        | 798.4468       | 399.7271         | 797.4628       | 399.2350         | 7  |
| 21 | 2254.2581 | 1127.6327       | 2237.2315      | 1119.1194        | 2236.2475      | 1118.6274        | A    | 687.3784  | 344.1928        | 670.3519       | 335.6796         | 669.3679       | 335.1876         | 6  |
| 22 | 2383.3007 | 1192.1540       | 2366.2741      | 1183.6407        | 2365.2901      | 1183.1487        | E    | 616.3413  | 308.6743        | 599.3148       | 300.1610         | 598.3307       | 299.6690         | 5  |
| 23 | 2496.3847 | 1248.6960       | 2479.3582      | 1240.1827        | 2478.3742      | 1239.6907        | I    | 487.2987  | 244.1530        | 470.2722       | 235.6397         |                |                  | 4  |
| 24 | 2567.4219 | 1284.2146       | 2550.3953      | 1275.7013        | 2549.4113      | 1275.2093        | A    | 374.2146  | 187.6110        | 357.1881       | 179.0977         |                |                  | 3  |
| 25 | 2695.4804 | 1348.2439       | 2678.4539      | 1339.7306        | 2677.4699      | 1339.2386        | Q    | 303.1775  | 152.0924        | 286.1510       | 143.5791         |                |                  | 2  |
| 26 |           |                 |                |                  |                |                  | R    | 175.1190  | 88.0631         | 158.0924       | 79.5498          |                |                  | 1  |

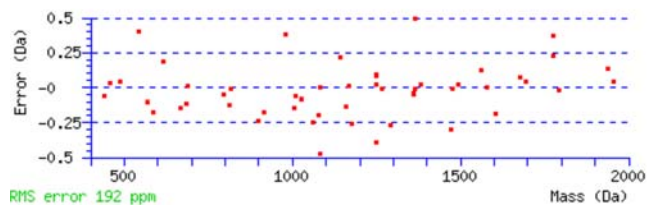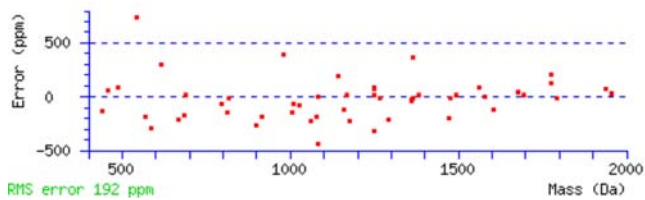

NCBI **BLAST** search of [SLLTEVETYVLSIIPSGPLKAEIAQR](#)

(Parameters: blastp, nr protein database, expect=20000, no filter, PAM30)

Other BLAST [web gateways](#)

**All matches to this query**

| Score | Mr(calc): | Delta  | Sequence                                   |
|-------|-----------|--------|--------------------------------------------|
| 86.1  | 2868.5848 | 0.0013 | <a href="#">SLLTEVETYVLSIIPSGPLKAEIAQR</a> |
| 2.7   | 2866.5262 | 2.0598 | <a href="#">EGQNLKELYLVSKITDYALIAIGR</a>   |
| 1.4   | 2867.5738 | 1.0122 | <a href="#">ANRPKLLIFVITGNPGFSAFYVPEAK</a> |

Mascot: <http://www.matrixscience.com/>

# MASCOT SCIENCE Mascot Search Results

## Peptide View

MS/MS Fragmentation of **SLLTEVETYVLSIIPSGPLKAEIAQRLEDVFA**GK

Found in **MI**, NIB74xp user\_supplied\_sequence

Match to Query 4892: 3728.032983 from(1243.684937,3+) intensity(492867.9688)

Title: B120210\_001.07405.07405.3

Data file B120210\_001.mgf.mascot

Click mouse within plot area to zoom in by factor of two about that point

Or, Plot from  to  Da

Label all possible matches  Label matches used for scoring

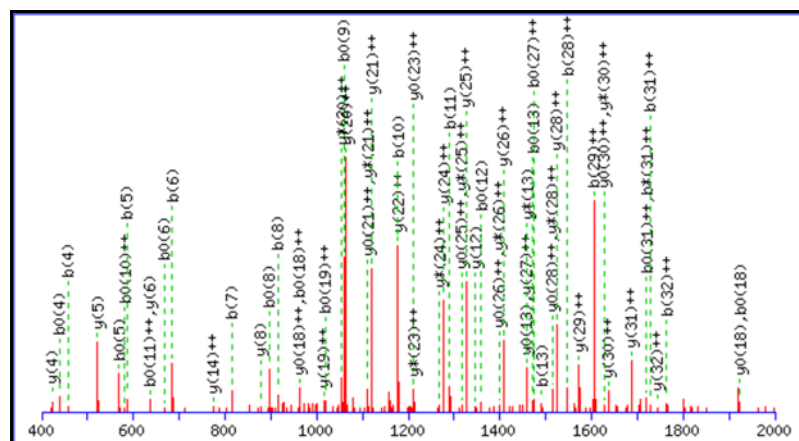

Monoisotopic mass of neutral peptide Mr(calc): 3728.0287

Fixed modifications: Carbamidomethyl (C) (apply to specified residues or termini only)

Variable modifications:

N-term : Acetyl (Protein N-term)

Ions Score: 49 Expect: 8.3e-05

Matches : 64/348 fragment ions using 118 most intense peaks ([help](#))

| #  | b         | b <sup>++</sup> | b*        | b <sup>*++</sup> | b <sup>0</sup> | b <sup>0++</sup> | Seq. | y         | y <sup>++</sup> | y*        | y <sup>*++</sup> | y <sup>0</sup> | y <sup>0++</sup> | #  |
|----|-----------|-----------------|-----------|------------------|----------------|------------------|------|-----------|-----------------|-----------|------------------|----------------|------------------|----|
| 1  | 130.0499  | 65.5286         |           |                  | 112.0393       | 56.5233          | S    |           |                 |           |                  |                |                  | 34 |
| 2  | 243.1339  | 122.0706        |           |                  | 225.1234       | 113.0653         | L    | 3599.9935 | 1800.5004       | 3582.9669 | 1791.9871        | 3581.9829      | 1791.4951        | 33 |
| 3  | 356.2180  | 178.6126        |           |                  | 338.2074       | 169.6074         | L    | 3486.9094 | 1743.9583       | 3469.8829 | 1735.4451        | 3468.8989      | 1734.9531        | 32 |
| 4  | 457.2657  | 229.1365        |           |                  | 439.2551       | 220.1312         | T    | 3373.8254 | 1687.4163       | 3356.7988 | 1678.9030        | 3355.8148      | 1678.4110        | 31 |
| 5  | 586.3083  | 293.6578        |           |                  | 568.2977       | 284.6525         | E    | 3272.7777 | 1636.8925       | 3255.7511 | 1628.3792        | 3254.7671      | 1627.8872        | 30 |
| 6  | 685.3767  | 343.1920        |           |                  | 667.3661       | 334.1867         | V    | 3143.7351 | 1572.3712       | 3126.7085 | 1563.8579        | 3125.7245      | 1563.3659        | 29 |
| 7  | 814.4193  | 407.7133        |           |                  | 796.4087       | 398.7080         | E    | 3044.6667 | 1522.8370       | 3027.6401 | 1514.3237        | 3026.6561      | 1513.8317        | 28 |
| 8  | 915.4670  | 458.2371        |           |                  | 897.4564       | 449.2318         | T    | 2915.6241 | 1458.3157       | 2898.5975 | 1449.8024        | 2897.6135      | 1449.3104        | 27 |
| 9  | 1078.5303 | 539.7688        |           |                  | 1060.5197      | 530.7635         | Y    | 2814.5764 | 1407.7918       | 2797.5498 | 1399.2786        | 2796.5658      | 1398.7866        | 26 |
| 10 | 1177.5987 | 589.3030        |           |                  | 1159.5881      | 580.2977         | V    | 2651.5131 | 1326.2602       | 2634.4865 | 1317.7469        | 2633.5025      | 1317.2549        | 25 |
| 11 | 1290.6828 | 645.8450        |           |                  | 1272.6722      | 636.8397         | L    | 2552.4447 | 1276.7260       | 2535.4181 | 1268.2127        | 2534.4341      | 1267.7207        | 24 |
| 12 | 1377.7148 | 689.3610        |           |                  | 1359.7042      | 680.3558         | S    | 2439.3606 | 1220.1839       | 2422.3340 | 1211.6707        | 2421.3500      | 1211.1786        | 23 |
| 13 | 1490.7989 | 745.9031        |           |                  | 1472.7883      | 736.8978         | I    | 2352.3286 | 1176.6679       | 2335.3020 | 1168.1546        | 2334.3180      | 1167.6626        | 22 |
| 14 | 1603.8829 | 802.4451        |           |                  | 1585.8724      | 793.4398         | I    | 2239.2445 | 1120.1259       | 2222.2179 | 1111.6126        | 2221.2339      | 1111.1206        | 21 |
| 15 | 1700.9357 | 850.9715        |           |                  | 1682.9251      | 841.9662         | P    | 2126.1604 | 1063.5839       | 2109.1339 | 1055.0706        | 2108.1499      | 1054.5786        | 20 |
| 16 | 1787.9677 | 894.4875        |           |                  | 1769.9571      | 885.4822         | S    | 2029.1077 | 1015.0575       | 2012.0811 | 1006.5442        | 2011.0971      | 1006.0522        | 19 |
| 17 | 1844.9892 | 922.9982        |           |                  | 1826.9786      | 913.9929         | G    | 1942.0756 | 971.5415        | 1925.0491 | 963.0282         | 1924.0651      | 962.5362         | 18 |
| 18 | 1942.0419 | 971.5246        |           |                  | 1924.0314      | 962.5193         | P    | 1885.0542 | 943.0307        | 1868.0276 | 934.5175         | 1867.0436      | 934.0254         | 17 |
| 19 | 2055.1260 | 1028.0666       |           |                  | 2037.1154      | 1019.0614        | L    | 1788.0014 | 894.5043        | 1770.9749 | 885.9911         | 1769.9908      | 885.4991         | 16 |
| 20 | 2183.2210 | 1092.1141       | 2166.1944 | 1083.6008        | 2165.2104      | 1083.1088        | K    | 1674.9173 | 837.9623        | 1657.8908 | 829.4490         | 1656.9068      | 828.9570         | 15 |
| 21 | 2254.2581 | 1127.6327       | 2237.2315 | 1119.1194        | 2236.2475      | 1118.6274        | A    | 1546.8224 | 773.9148        | 1529.7958 | 765.4016         | 1528.8118      | 764.9095         | 14 |
| 22 | 2383.3007 | 1192.1540       | 2366.2741 | 1183.6407        | 2365.2901      | 1183.1487        | E    | 1475.7853 | 738.3963        | 1458.7587 | 729.8830         | 1457.7747      | 729.3910         | 13 |
| 23 | 2496.3847 | 1248.6960       | 2479.3582 | 1240.1827        | 2478.3742      | 1239.6907        | I    | 1346.7427 | 673.8750        | 1329.7161 | 665.3617         | 1328.7321      | 664.8697         | 12 |
| 24 | 2567.4219 | 1284.2146       | 2550.3953 | 1275.7013        | 2549.4113      | 1275.2093        | A    | 1233.6586 | 617.3329        | 1216.6321 | 608.8197         | 1215.6480      | 608.3277         | 11 |
| 25 | 2695.4804 | 1348.2439       | 2678.4539 | 1339.7306        | 2677.4699      | 1339.2386        | Q    | 1162.6215 | 581.8144        | 1145.5950 | 573.3011         | 1144.6109      | 572.8091         | 10 |
| 26 | 2851.5815 | 1426.2944       | 2834.5550 | 1417.7811        | 2833.5710      | 1417.2891        | R    | 1034.5629 | 517.7851        | 1017.5364 | 509.2718         | 1016.5524      | 508.7798         | 9  |
| 27 | 2964.6656 | 1482.8364       | 2947.6391 | 1474.3232        | 2946.6550      | 1473.8312        | L    | 878.4618  | 439.7345        | 861.4353  | 431.2213         | 860.4512       | 430.7293         | 8  |

|    |           |           |           |           |           |           |   |          |          |          |          |          |          |   |
|----|-----------|-----------|-----------|-----------|-----------|-----------|---|----------|----------|----------|----------|----------|----------|---|
| 28 | 3093.7082 | 1547.3577 | 3076.6816 | 1538.8445 | 3075.6976 | 1538.3525 | E | 765.3777 | 383.1925 | 748.3512 | 374.6792 | 747.3672 | 374.1872 | 7 |
| 29 | 3208.7351 | 1604.8712 | 3191.7086 | 1596.3579 | 3190.7246 | 1595.8659 | D | 636.3352 | 318.6712 | 619.3086 | 310.1579 | 618.3246 | 309.6659 | 6 |
| 30 | 3307.8036 | 1654.4054 | 3290.7770 | 1645.8921 | 3289.7930 | 1645.4001 | V | 521.3082 | 261.1577 | 504.2817 | 252.6445 |          |          | 5 |
| 31 | 3454.8720 | 1727.9396 | 3437.8454 | 1719.4263 | 3436.8614 | 1718.9343 | F | 422.2398 | 211.6235 | 405.2132 | 203.1103 |          |          | 4 |
| 32 | 3525.9091 | 1763.4582 | 3508.8825 | 1754.9449 | 3507.8985 | 1754.4529 | A | 275.1714 | 138.0893 | 258.1448 | 129.5761 |          |          | 3 |
| 33 | 3582.9305 | 1791.9689 | 3565.9040 | 1783.4556 | 3564.9200 | 1782.9636 | G | 204.1343 | 102.5708 | 187.1077 | 94.0575  |          |          | 2 |
| 34 |           |           |           |           |           |           | K | 147.1128 | 74.0600  | 130.0863 | 65.5468  |          |          | 1 |

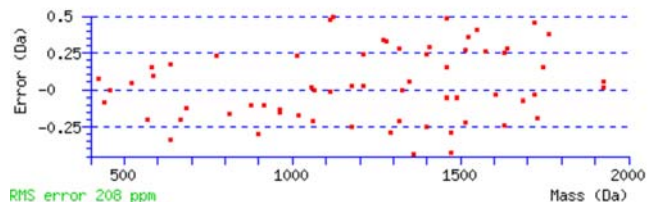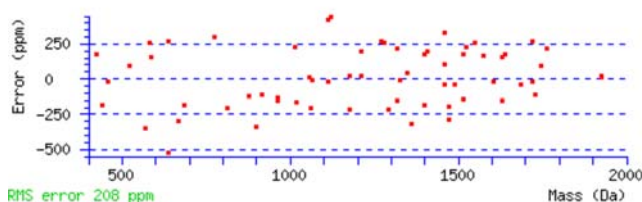

NCBI BLAST search of [SLLTEVETYVLSIIPSGPLKAEIAQRLEDVFAGK](#)

(Parameters: blastp, nr protein database, expect=20000, no filter, PAM30)

Other BLAST [web gateways](#)

All matches to this query

| Score | Mr(calc): | Delta  | Sequence                                           |
|-------|-----------|--------|----------------------------------------------------|
| 49.1  | 3728.0287 | 0.0042 | <a href="#">SLLTEVETYVLSIIPSGPLKAEIAQRLEDVFAGK</a> |
| 5.2   | 3725.9644 | 2.0686 | <a href="#">NLALFEEELDIRPKVSSLLGKLVSYTNLTQGAK</a>  |
| 5.2   | 3725.9644 | 2.0686 | <a href="#">NLALFEEELDIRPKVSSLLGKLVSYTNLTQGAK</a>  |
| 4.9   | 3728.0215 | 0.0115 | <a href="#">NSMTPNPGYQPSMNTSDMMGRMSYEPNK</a>       |
| 4.1   | 3728.0215 | 0.0115 | <a href="#">NSMTPNPGYQPSMNTSDMMGRMSYEPNK</a>       |
| 1.2   | 3727.0375 | 0.9955 | <a href="#">NSMTPNPGYQPSMNTSDMMGRMSYEPNK</a>       |
| 1.2   | 3728.0215 | 0.0115 | <a href="#">NSMTPNPGYQPSMNTSDMMGRMSYEPNK</a>       |
| 0.9   | 3726.9824 | 1.0506 | <a href="#">DTLIWSFVGPVGTVIIVNTVIFVLSAKVSCQRK</a>  |
| 0.9   | 3726.9824 | 1.0506 | <a href="#">DTLIWSFVGPVGTVIIVNTVIFVLSAKVSCQRK</a>  |
| 0.9   | 3727.9619 | 0.0711 | <a href="#">KPLSLMVMLSLAVGLSLVQDIIAAEYIILTMNR</a>  |

Mascot: <http://www.matrixscience.com/>

# MATRIX SCIENCE Mascot Search Results

## Peptide View

MS/MS Fragmentation of **SLLTEVETPIR**

Found in **M2**, NIB74xp user\_supplied\_sequence

Match to Query 1680: 1298.709202 from(650.361877,2+) intensity(4654521.0000)

Title: B120210\_001\_120211144847.05670.05670.2

Data file B120210\_001\_120211144847.mgf.mascot

Click mouse within plot area to zoom in by factor of two about that point

Or, Plot from  to  Da

Label all possible matches  Label matches used for scoring

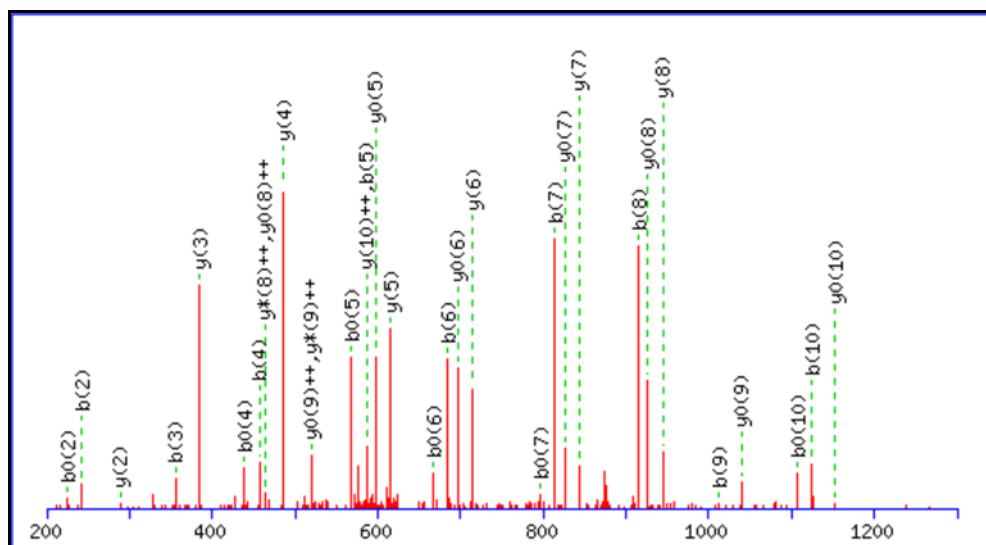

**Monoisotopic mass of neutral peptide Mr(calc):** 1298.7082

**Fixed modifications:** Carbamidomethyl (C) (apply to specified residues or termini only)

**Variable modifications:**

**N-term :** Acetyl (Protein N-term)

**Ions Score:** 75 **Expect:** 1.6e-06

**Matches :** 33/94 fragment ions using 41 most intense peaks ([help](#))

| #  | b                | b <sup>++</sup> | b <sup>0</sup>   | b <sup>0++</sup> | Seq. | y               | y <sup>++</sup> | y*        | y <sup>*++</sup> | y <sup>0</sup>   | y <sup>0++</sup> | #  |
|----|------------------|-----------------|------------------|------------------|------|-----------------|-----------------|-----------|------------------|------------------|------------------|----|
| 1  | 130.0499         | 65.5286         | 112.0393         | 56.5233          | S    |                 |                 |           |                  |                  |                  | 11 |
| 2  | <b>243.1339</b>  | 122.0706        | <b>225.1234</b>  | 113.0653         | L    | 1170.6729       | <b>585.8401</b> | 1153.6463 | 577.3268         | <b>1152.6623</b> | 576.8348         | 10 |
| 3  | <b>356.2180</b>  | 178.6126        | 338.2074         | 169.6074         | L    | 1057.5888       | 529.2980        | 1040.5623 | <b>520.7848</b>  | <b>1039.5782</b> | <b>520.2928</b>  | 9  |
| 4  | <b>457.2657</b>  | 229.1365        | <b>439.2551</b>  | 220.1312         | T    | <b>944.5047</b> | 472.7560        | 927.4782  | <b>464.2427</b>  | <b>926.4942</b>  | <b>463.7507</b>  | 8  |
| 5  | <b>586.3083</b>  | 293.6578        | <b>568.2977</b>  | 284.6525         | E    | <b>843.4571</b> | 422.2322        | 826.4305  | 413.7189         | <b>825.4465</b>  | 413.2269         | 7  |
| 6  | <b>685.3767</b>  | 343.1920        | <b>667.3661</b>  | 334.1867         | V    | <b>714.4145</b> | 357.7109        | 697.3879  | 349.1976         | <b>696.4039</b>  | 348.7056         | 6  |
| 7  | <b>814.4193</b>  | 407.7133        | <b>796.4087</b>  | 398.7080         | E    | <b>615.3461</b> | 308.1767        | 598.3195  | 299.6634         | <b>597.3355</b>  | 299.1714         | 5  |
| 8  | <b>915.4670</b>  | 458.2371        | 897.4564         | 449.2318         | T    | <b>486.3035</b> | 243.6554        | 469.2769  | 235.1421         | 468.2929         | 234.6501         | 4  |
| 9  | <b>1012.5197</b> | 506.7635        | 994.5092         | 497.7582         | P    | <b>385.2558</b> | 193.1315        | 368.2292  | 184.6183         |                  |                  | 3  |
| 10 | <b>1125.6038</b> | 563.3055        | <b>1107.5932</b> | 554.3002         | I    | <b>288.2030</b> | 144.6051        | 271.1765  | 136.0919         |                  |                  | 2  |
| 11 |                  |                 |                  |                  | R    | 175.1190        | 88.0631         | 158.0924  | 79.5498          |                  |                  | 1  |

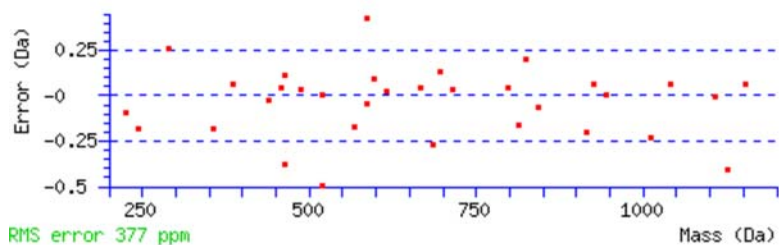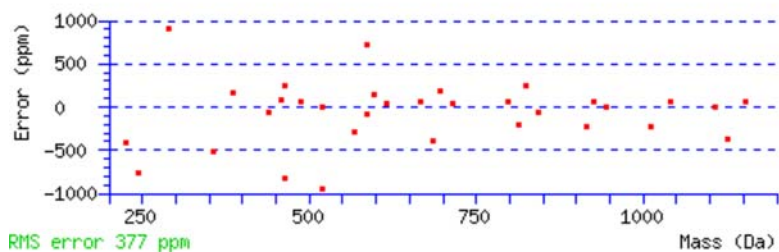

NCBI **BLAST** search of [SLLTEVETPIR](#)

(Parameters: blastp, nr protein database, expect=20000, no filter, PAM30)

Other BLAST [web gateways](#)

#### All matches to this query

| Score | Mr(calc): | Delta   | Sequence                     |
|-------|-----------|---------|------------------------------|
| 75.3  | 1298.7082 | 0.0010  | <a href="#">SLLTEVETPIR</a>  |
| 12.6  | 1298.7167 | -0.0075 | <a href="#">RDLGSRLQAQR</a>  |
| 12.5  | 1298.7241 | -0.0149 | <a href="#">RELQRMTLPR</a>   |
| 10.1  | 1298.7112 | -0.0019 | <a href="#">FKTNIVLKTR</a>   |
| 9.4   | 1298.7194 | -0.0102 | <a href="#">DLASVSLKNPVR</a> |
| 8.7   | 1297.6990 | 1.0102  | <a href="#">DNPQSRNLLIK</a>  |
| 8.6   | 1298.6886 | 0.0206  | <a href="#">LEYQLLLAKK</a>   |
| 7.8   | 1298.6943 | 0.0149  | <a href="#">VQEEIDRVVGR</a>  |
| 7.7   | 1298.6999 | 0.0093  | <a href="#">FISKEILTIR</a>   |
| 7.6   | 1298.6999 | 0.0093  | <a href="#">TLIQFTVKLR</a>   |

Mascot: <http://www.matrixscience.com/>



# MASCOT SCIENCE Mascot Search Results

## Peptide View

MS/MS Fragmentation of **SLLTEVETPIRNEWGCR**

Found in **M2**, NIB74xp user\_supplied\_sequence

Match to Query 3383: 2101.025242 from(1051.519897,2+) intensity(2365194.2500)

Title: B120210\_001\_120211144847.05886.05886.2

Data file B120210\_001\_120211144847.mgf.mascot

Click mouse within plot area to zoom in by factor of two about that point

Or, Plot from  to  Da

Label all possible matches  Label matches used for scoring

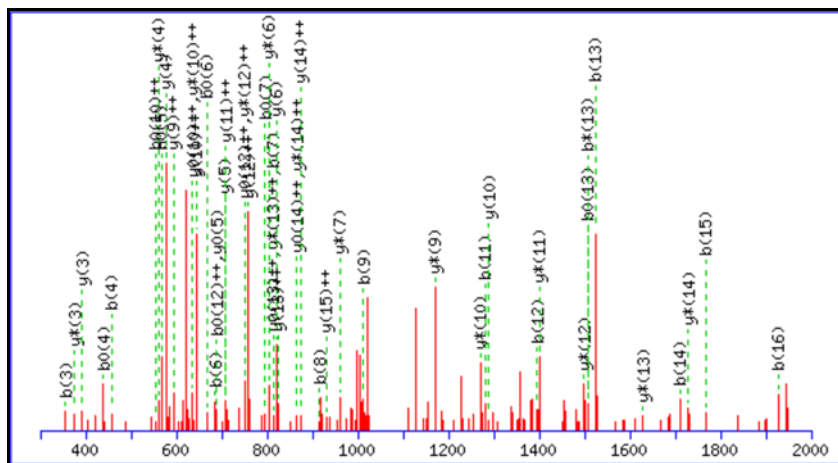

Monoisotopic mass of neutral peptide  $M_r(\text{calc})$ : 2101.0262

Fixed modifications: Carbamidomethyl (C) (apply to specified residues or termini only)

Variable modifications:

N-term : Acetyl (Protein N-term)

Ions Score: 37 Expect: 0.0015

Matches : 51/164 fragment ions using 140 most intense peaks ([help](#))

| #  | b                | b <sup>++</sup> | b*               | b <sup>*++</sup> | b <sup>0</sup>   | b <sup>0++</sup> | Seq. | y                | y <sup>++</sup> | y*               | y <sup>*++</sup> | y <sup>0</sup>  | y <sup>0++</sup> | #  |
|----|------------------|-----------------|------------------|------------------|------------------|------------------|------|------------------|-----------------|------------------|------------------|-----------------|------------------|----|
| 1  | 130.0499         | 65.5286         |                  |                  | 112.0393         | 56.5233          | S    |                  |                 |                  |                  |                 |                  | 17 |
| 2  | 243.1339         | 122.0706        |                  |                  | 225.1234         | 113.0653         | L    | 1972.9909        | 986.9991        | 1955.9644        | 978.4858         | 1954.9804       | 977.9938         | 16 |
| 3  | <b>356.2180</b>  | 178.6126        |                  |                  | 338.2074         | 169.6074         | L    | 1859.9069        | <b>930.4571</b> | 1842.8803        | 921.9438         | 1841.8963       | 921.4518         | 15 |
| 4  | <b>457.2657</b>  | 229.1365        |                  |                  | <b>439.2551</b>  | 220.1312         | T    | 1746.8228        | <b>873.9150</b> | <b>1729.7962</b> | <b>865.4018</b>  | 1728.8122       | <b>864.9098</b>  | 14 |
| 5  | 586.3083         | 293.6578        |                  |                  | <b>568.2977</b>  | 284.6525         | E    | 1645.7751        | <b>823.3912</b> | <b>1628.7486</b> | <b>814.8779</b>  | 1627.7646       | <b>814.3859</b>  | 13 |
| 6  | <b>685.3767</b>  | 343.1920        |                  |                  | <b>667.3661</b>  | 334.1867         | V    | 1516.7325        | <b>758.8699</b> | <b>1499.7060</b> | <b>750.3566</b>  | 1498.7220       | <b>749.8646</b>  | 12 |
| 7  | <b>814.4193</b>  | 407.7133        |                  |                  | <b>796.4087</b>  | 398.7080         | E    | 1417.6641        | <b>709.3357</b> | <b>1400.6376</b> | 700.8224         | 1399.6535       | 700.3304         | 11 |
| 8  | <b>915.4670</b>  | 458.2371        |                  |                  | 897.4564         | 449.2318         | T    | <b>1288.6215</b> | <b>644.8144</b> | <b>1271.5950</b> | <b>636.3011</b>  | 1270.6110       | <b>635.8091</b>  | 10 |
| 9  | <b>1012.5197</b> | 506.7635        |                  |                  | 994.5092         | 497.7582         | P    | 1187.5738        | <b>594.2906</b> | <b>1170.5473</b> | 585.7773         | 1169.5633       | 585.2853         | 9  |
| 10 | 1125.6038        | 563.3055        |                  |                  | 1107.5932        | <b>554.3002</b>  | I    | 1090.5211        | 545.7642        | 1073.4945        | 537.2509         | 1072.5105       | 536.7589         | 8  |
| 11 | <b>1281.7049</b> | 641.3561        | 1264.6783        | 632.8428         | 1263.6943        | 632.3508         | R    | 977.4370         | 489.2221        | <b>960.4105</b>  | 480.7089         | 959.4264        | 480.2169         | 7  |
| 12 | <b>1395.7478</b> | 698.3775        | 1378.7213        | 689.8643         | 1377.7373        | <b>689.3723</b>  | N    | <b>821.3359</b>  | 411.1716        | <b>804.3093</b>  | 402.6583         | 803.3253        | 402.1663         | 6  |
| 13 | <b>1524.7904</b> | 762.8988        | <b>1507.7639</b> | 754.3856         | <b>1506.7798</b> | 753.8936         | E    | <b>707.2930</b>  | 354.1501        | 690.2664         | 345.6368         | <b>689.2824</b> | 345.1448         | 5  |
| 14 | <b>1710.8697</b> | 855.9385        | 1693.8432        | 847.4252         | 1692.8592        | 846.9332         | W    | <b>578.2504</b>  | 289.6288        | <b>561.2238</b>  | 281.1156         |                 |                  | 4  |
| 15 | <b>1767.8912</b> | 884.4492        | 1750.8646        | 875.9360         | 1749.8806        | 875.4440         | G    | <b>392.1711</b>  | 196.5892        | <b>375.1445</b>  | 188.0759         |                 |                  | 3  |
| 16 | <b>1927.9218</b> | 964.4646        | 1910.8953        | 955.9513         | 1909.9113        | 955.4593         | C    | 335.1496         | 168.0784        | 318.1231         | 159.5652         |                 |                  | 2  |
| 17 |                  |                 |                  |                  |                  |                  | R    | 175.1190         | 88.0631         | 158.0924         | 79.5498          |                 |                  | 1  |

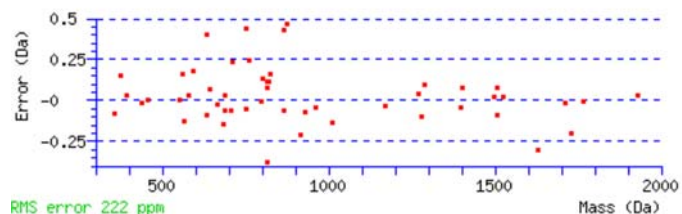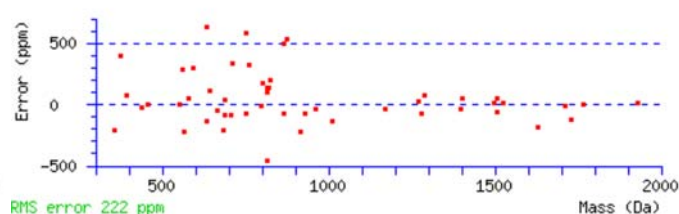



NCBI **BLAST** search of [SLLTEVETPIRNEWGCR](#)

(Parameters: blastp, nr protein database, expect=20000, no filter, PAM30)

Other BLAST [web gateways](#)**All matches to this query**

| Score | Mr(calc): | Delta   | Sequence                             |
|-------|-----------|---------|--------------------------------------|
| 36.6  | 2101.0262 | -0.0010 | <a href="#">SLLTEVETPIRNEWGCR</a>    |
| 6.0   | 2101.0123 | 0.0130  | <a href="#">VGLSVSPTVSGAKGPVPHPR</a> |
| 4.6   | 2101.0123 | 0.0130  | <a href="#">VGLSVSPTVSGAKGPVPHPR</a> |
| 2.8   | 2098.9928 | 2.0325  | <a href="#">KMQSITPVQTPQPLPFK</a>    |
| 1.4   | 2101.0123 | 0.0130  | <a href="#">VGLSVSPTVSGAKGPVPHPR</a> |
| 0.8   | 2098.9805 | 2.0447  | <a href="#">YAFPVSNNLPLFAFEYK</a>    |
| 0.4   | 2101.0228 | 0.0024  | <a href="#">SSKPGWLLNTEVGENQR</a>    |

**Mascot:** <http://www.matrixscience.com/>

**X181**  
**N-terminal peptide spectra**

**Mascot Search Results**

**Peptide View**

MS/MS Fragmentation of **MDVNPTLLFLK**  
 Found in **PBI**, NYMC X-181

Match to Query 1247: 1331.716894 from(666.865723,2+) intensity(540614.0000)  
 Title: B111206\_007.05336.05336.2  
 Data file B111206\_007.mgf.mascot

Click mouse within plot area to zoom in by factor of two about that point

Or, Plot from  to  Da   
 Label all possible matches  Label matches used for scoring

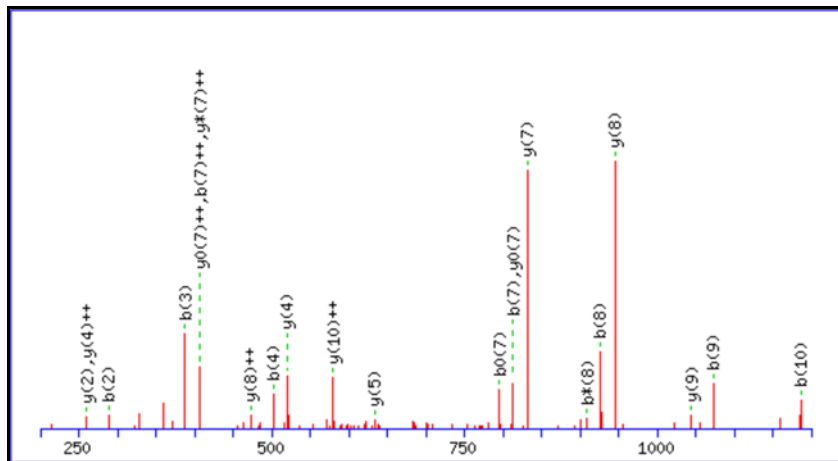

Monoisotopic mass of neutral peptide **Mr(calc)**: 1331.7159  
**Fixed modifications**: Carbamidomethyl (C) (apply to specified residues or termini only)  
**Variable modifications**:  
**N-term** : Acetyl (Protein N-term)  
**Ions Score**: 74 **Expect**: 1.4e-05  
**Matches** : 23/102 fragment ions using 20 most intense peaks ([help](#))

| #  | b                | b <sup>++</sup> | b*              | b <sup>*++</sup> | b <sup>0</sup>  | b <sup>0++</sup> | Seq. | y                | y <sup>++</sup> | y*        | y <sup>*++</sup> | y <sup>0</sup>  | y <sup>0++</sup> | #  |
|----|------------------|-----------------|-----------------|------------------|-----------------|------------------|------|------------------|-----------------|-----------|------------------|-----------------|------------------|----|
| 1  | 174.0583         | 87.5328         |                 |                  |                 |                  | M    |                  |                 |           |                  |                 |                  | 11 |
| 2  | <b>289.0853</b>  | 145.0463        |                 |                  | 271.0747        | 136.0410         | D    | 1159.6721        | <b>580.3397</b> | 1142.6456 | 571.8264         | 1141.6616       | 571.3344         | 10 |
| 3  | <b>388.1537</b>  | 194.5805        |                 |                  | 370.1431        | 185.5752         | V    | <b>1044.6452</b> | 522.8262        | 1027.6186 | 514.3130         | 1026.6346       | 513.8210         | 9  |
| 4  | <b>502.1966</b>  | 251.6019        | 485.1701        | 243.0887         | 484.1860        | 242.5967         | N    | <b>945.5768</b>  | <b>473.2920</b> | 928.5502  | 464.7788         | 927.5662        | 464.2867         | 8  |
| 5  | 599.2494         | 300.1283        | 582.2228        | 291.6151         | 581.2388        | 291.1230         | P    | <b>831.5339</b>  | 416.2706        | 814.5073  | <b>407.7573</b>  | <b>813.5233</b> | <b>407.2653</b>  | 7  |
| 6  | 700.2971         | 350.6522        | 683.2705        | 342.1389         | 682.2865        | 341.6469         | T    | 734.4811         | 367.7442        | 717.4545  | 359.2309         | 716.4705        | 358.7389         | 6  |
| 7  | <b>813.3811</b>  | <b>407.1942</b> | 796.3546        | 398.6809         | <b>795.3706</b> | 398.1889         | L    | <b>633.4334</b>  | 317.2203        | 616.4069  | 308.7071         |                 |                  | 5  |
| 8  | <b>926.4652</b>  | 463.7362        | <b>909.4386</b> | 455.2230         | 908.4546        | 454.7309         | L    | <b>520.3493</b>  | <b>260.6783</b> | 503.3228  | 252.1650         |                 |                  | 4  |
| 9  | <b>1073.5336</b> | 537.2704        | 1056.5070       | 528.7572         | 1055.5230       | 528.2652         | F    | <b>407.2653</b>  | 204.1363        | 390.2387  | 195.6230         |                 |                  | 3  |
| 10 | <b>1186.6177</b> | 593.8125        | 1169.5911       | 585.2992         | 1168.6071       | 584.8072         | L    | <b>260.1969</b>  | 130.6021        | 243.1703  | 122.0888         |                 |                  | 2  |
| 11 |                  |                 |                 |                  |                 |                  | K    | 147.1128         | 74.0600         | 130.0863  | 65.5468          |                 |                  | 1  |

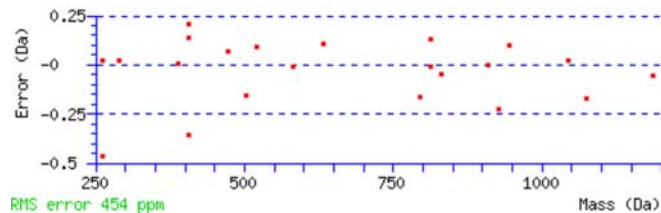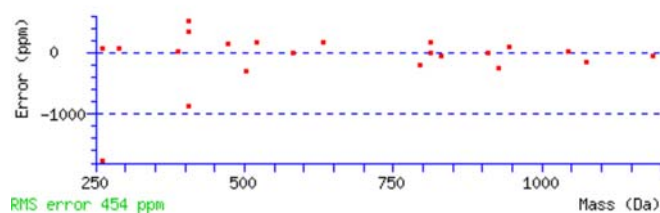

NCBI **BLAST** search of **MDVNPTLLFLK**  
 (Parameters: blastp, nr protein database, expect=20000, no filter, PAM30)  
 Other BLAST [web gateways](#)

**All matches to this query**

| Score | Mr(calc): | Delta | Sequence |
|-------|-----------|-------|----------|
|-------|-----------|-------|----------|

|      |           |         |                               |
|------|-----------|---------|-------------------------------|
| 74.0 | 1331.7159 | 0.0010  | <a href="#">MDVNPTLLFLK</a>   |
| 26.6 | 1331.7231 | -0.0062 | <a href="#">KQMNSKLNELK</a>   |
| 26.6 | 1331.6932 | 0.0237  | <a href="#">KQTETLQNQLK</a>   |
| 26.6 | 1331.7006 | 0.0163  | <a href="#">MTPQKVSELLK</a>   |
| 17.6 | 1331.6924 | 0.0245  | <a href="#">VTIMGIYSIKK</a>   |
| 17.6 | 1331.6924 | 0.0245  | <a href="#">VTIMGIYSIKK</a>   |
| 16.7 | 1331.6979 | 0.0190  | <a href="#">EGSNLCQRKIK</a>   |
| 15.7 | 1331.6979 | 0.0190  | <a href="#">EEMGGGLRRALK</a>  |
| 14.9 | 1330.6995 | 1.0174  | <a href="#">CLINFYFLIK</a>    |
| 14.3 | 1331.6932 | 0.0237  | <a href="#">STAQAVALSDELK</a> |

**Mascot:** <http://www.matrixscience.com/>

# MASCOT SCIENCE Mascot Search Results

## Peptide View

MS/MS Fragmentation of **SLLTEVETYVLSIIPSGPLK**

Found in **M1**, NYMC X-181

Match to Query 2842: 2158.216650 from(1080.115601,2+) intensity(56373.7188)

Title: B120210\_009.06659.06659.2

Data file B120210\_009.mgf.mascot

Click mouse within plot area to zoom in by factor of two about that point

Or, Plot from  to  Da

Label all possible matches  Label matches used for scoring

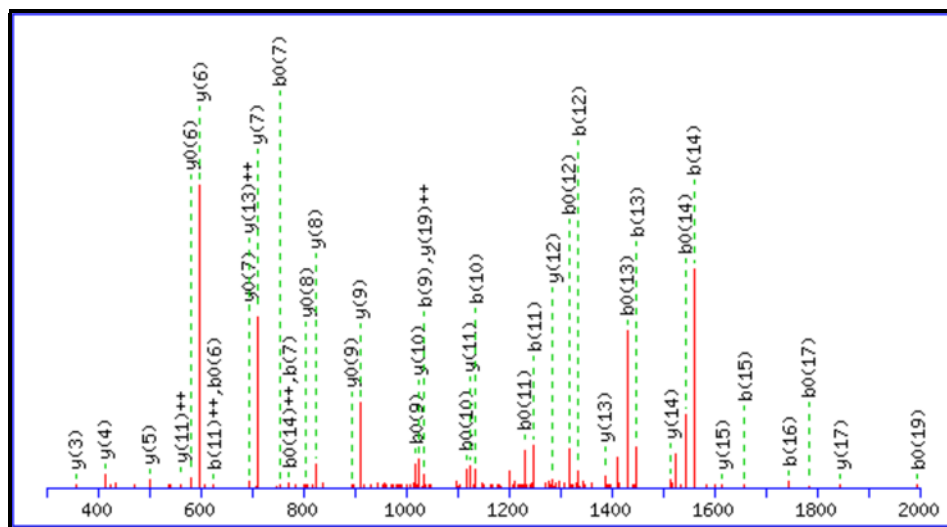

Monoisotopic mass of neutral peptide  $M_r(\text{calc})$ : 2158.2137

Fixed modifications: Carbamidomethyl (C) (apply to specified residues or termini only)

Ions Score: 90 Expect: 5.2e-08

Matches : 43/182 fragment ions using 68 most intense peaks ([help](#))

| #  | b         | b <sup>++</sup> | b <sup>0</sup> | b <sup>0++</sup> | Seq. | y         | y <sup>++</sup> | y*        | y <sup>*++</sup> | y <sup>0</sup> | y <sup>0++</sup> | #  |
|----|-----------|-----------------|----------------|------------------|------|-----------|-----------------|-----------|------------------|----------------|------------------|----|
| 1  | 88.0393   | 44.5233         | 70.0287        | 35.5180          | S    |           |                 |           |                  |                |                  | 20 |
| 2  | 201.1234  | 101.0653        | 183.1128       | 92.0600          | L    | 2072.1889 | 1036.5981       | 2055.1624 | 1028.0848        | 2054.1784      | 1027.5928        | 19 |
| 3  | 314.2074  | 157.6074        | 296.1969       | 148.6021         | L    | 1959.1049 | 980.0561        | 1942.0783 | 971.5428         | 1941.0943      | 971.0508         | 18 |
| 4  | 415.2551  | 208.1312        | 397.2445       | 199.1259         | T    | 1846.0208 | 923.5140        | 1828.9943 | 915.0008         | 1828.0102      | 914.5088         | 17 |
| 5  | 544.2977  | 272.6525        | 526.2871       | 263.6472         | E    | 1744.9731 | 872.9902        | 1727.9466 | 864.4769         | 1726.9626      | 863.9849         | 16 |
| 6  | 643.3661  | 322.1867        | 625.3556       | 313.1814         | V    | 1615.9305 | 808.4689        | 1598.9040 | 799.9556         | 1597.9200      | 799.4636         | 15 |
| 7  | 772.4087  | 386.7080        | 754.3981       | 377.7027         | E    | 1516.8621 | 758.9347        | 1499.8356 | 750.4214         | 1498.8516      | 749.9294         | 14 |
| 8  | 873.4564  | 437.2318        | 855.4458       | 428.2266         | T    | 1387.8195 | 694.4134        | 1370.7930 | 685.9001         | 1369.8090      | 685.4081         | 13 |
| 9  | 1036.5197 | 518.7635        | 1018.5092      | 509.7582         | Y    | 1286.7719 | 643.8896        | 1269.7453 | 635.3763         | 1268.7613      | 634.8843         | 12 |
| 10 | 1135.5881 | 568.2977        | 1117.5776      | 559.2924         | V    | 1123.7085 | 562.3579        | 1106.6820 | 553.8446         | 1105.6980      | 553.3526         | 11 |
| 11 | 1248.6722 | 624.8397        | 1230.6616      | 615.8345         | L    | 1024.6401 | 512.8237        | 1007.6136 | 504.3104         | 1006.6295      | 503.8184         | 10 |
| 12 | 1335.7042 | 668.3558        | 1317.6937      | 659.3505         | S    | 911.5560  | 456.2817        | 894.5295  | 447.7684         | 893.5455       | 447.2764         | 9  |
| 13 | 1448.7883 | 724.8978        | 1430.7777      | 715.8925         | I    | 824.5240  | 412.7656        | 807.4975  | 404.2524         | 806.5135       | 403.7604         | 8  |
| 14 | 1561.8724 | 781.4398        | 1543.8618      | 772.4345         | I    | 711.4400  | 356.2236        | 694.4134  | 347.7103         | 693.4294       | 347.2183         | 7  |
| 15 | 1658.9251 | 829.9662        | 1640.9146      | 820.9609         | P    | 598.3559  | 299.6816        | 581.3293  | 291.1683         | 580.3453       | 290.6763         | 6  |
| 16 | 1745.9571 | 873.4822        | 1727.9466      | 864.4769         | S    | 501.3031  | 251.1552        | 484.2766  | 242.6419         | 483.2926       | 242.1499         | 5  |
| 17 | 1802.9786 | 901.9929        | 1784.9680      | 892.9877         | G    | 414.2711  | 207.6392        | 397.2445  | 199.1259         |                |                  | 4  |
| 18 | 1900.0314 | 950.5193        | 1882.0208      | 941.5140         | P    | 357.2496  | 179.1285        | 340.2231  | 170.6152         |                |                  | 3  |
| 19 | 2013.1154 | 1007.0614       | 1995.1049      | 998.0561         | L    | 260.1969  | 130.6021        | 243.1703  | 122.0888         |                |                  | 2  |

|    |  |  |  |  |          |          |         |          |         |  |  |          |
|----|--|--|--|--|----------|----------|---------|----------|---------|--|--|----------|
| 20 |  |  |  |  | <b>K</b> | 147.1128 | 74.0600 | 130.0863 | 65.5468 |  |  | <b>1</b> |
|----|--|--|--|--|----------|----------|---------|----------|---------|--|--|----------|

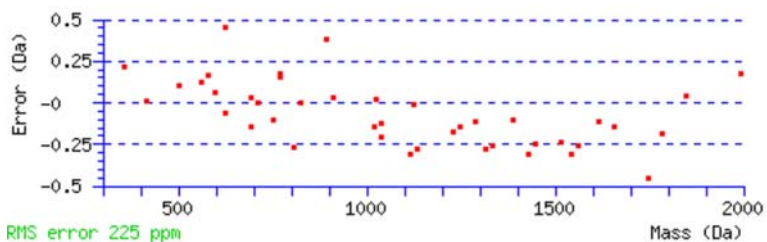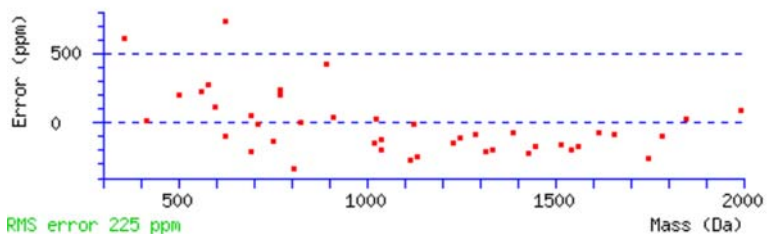

NCBI **BLAST** search of [SLLTEVETYVLSIIPSGPLK](#)  
 (Parameters: blastp, nr protein database, expect=20000, no filter, PAM30)  
 Other BLAST [web gateways](#)

**All matches to this query**

| Score | Mr(calc): | Delta   | Sequence                              |
|-------|-----------|---------|---------------------------------------|
| 90.2  | 2158.2137 | 0.0030  | <a href="#">SLLTEVETYVLSIIPSGPLK</a>  |
| 15.5  | 2158.1971 | 0.0196  | <a href="#">QGVVVRGSRPPVSRALPQPEK</a> |
| 7.6   | 2157.2131 | 1.0036  | <a href="#">QGVVVRGSRPPVSRALPQPEK</a> |
| 6.5   | 2158.2126 | 0.0040  | <a href="#">IAQGISGLVRPLLSGLKVSK</a>  |
| 4.4   | 2158.2435 | -0.0269 | <a href="#">QVITIILLLLCKASDFR</a>     |
| 3.6   | 2157.1714 | 1.0452  | <a href="#">NAKPVSILRDLITEAMEIK</a>   |
| 2.7   | 2158.1858 | 0.0309  | <a href="#">LQGNLAERSNFLARGASLLK</a>  |
| 2.7   | 2158.1858 | 0.0309  | <a href="#">LQGNLAERSNFLARGASLLK</a>  |
| 2.5   | 2158.1972 | 0.0194  | <a href="#">WRVRLAIEYMPLLAGQL</a>     |
| 2.4   | 2157.1727 | 1.0439  | <a href="#">KKEVLIAGLKPSLAVYLR</a>    |

**Mascot:** <http://www.matrixscience.com/>

# MASCOT SCIENCE Mascot Search Results

## Peptide View

MS/MS Fragmentation of **SLLTEVETYVLSIIPSGPLK**

Found in **M1**, NYMC X-181

Match to Query 3472: 2200.224462 from(1101.119507,2+) intensity(238763.0000)

Title: B111206\_007.06750.06750.2

Data file B111206\_007.mgf.mascot

Click mouse within plot area to zoom in by factor of two about that point

Or, Plot from  to  Da

Label all possible matches  Label matches used for scoring

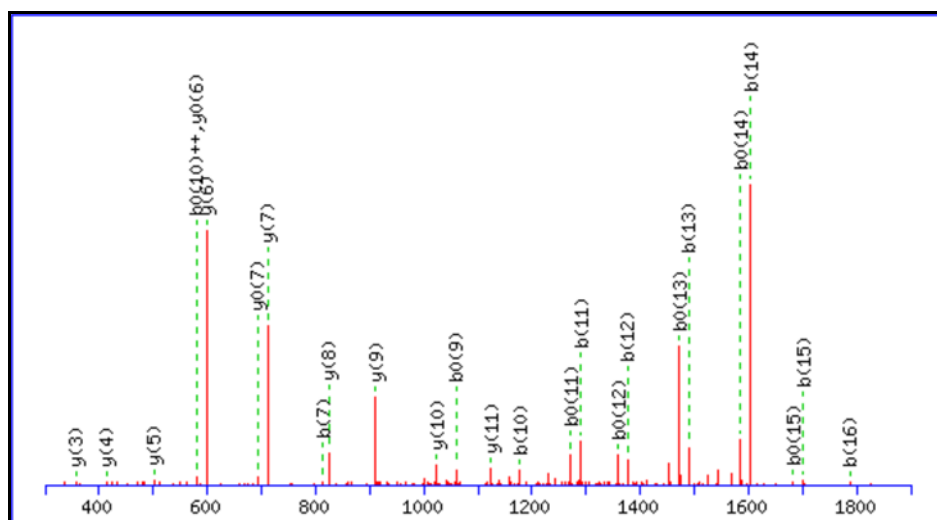

Monoisotopic mass of neutral peptide  $M_r(\text{calc})$ : 2200.2242

Fixed modifications: Carbamidomethyl (C) (apply to specified residues or termini only)

Variable modifications:

N-term : Acetyl (Protein N-term)

Ions Score: 79 Expect: 1.2e-06

Matches : 26/182 fragment ions using 30 most intense peaks ([help](#))

| #  | b                | b <sup>++</sup> | b <sup>0</sup>   | b <sup>0++</sup> | Seq. | y                | y <sup>++</sup> | y <sup>*</sup> | y <sup>*++</sup> | y <sup>0</sup>  | y <sup>0++</sup> | #  |
|----|------------------|-----------------|------------------|------------------|------|------------------|-----------------|----------------|------------------|-----------------|------------------|----|
| 1  | 130.0499         | 65.5286         | 112.0393         | 56.5233          | S    |                  |                 |                |                  |                 |                  | 20 |
| 2  | 243.1339         | 122.0706        | 225.1234         | 113.0653         | L    | 2072.1889        | 1036.5981       | 2055.1624      | 1028.0848        | 2054.1784       | 1027.5928        | 19 |
| 3  | 356.2180         | 178.6126        | 338.2074         | 169.6074         | L    | 1959.1049        | 980.0561        | 1942.0783      | 971.5428         | 1941.0943       | 971.0508         | 18 |
| 4  | 457.2657         | 229.1365        | 439.2551         | 220.1312         | T    | 1846.0208        | 923.5140        | 1828.9943      | 915.0008         | 1828.0102       | 914.5088         | 17 |
| 5  | 586.3083         | 293.6578        | 568.2977         | 284.6525         | E    | 1744.9731        | 872.9902        | 1727.9466      | 864.4769         | 1726.9626       | 863.9849         | 16 |
| 6  | 685.3767         | 343.1920        | 667.3661         | 334.1867         | V    | 1615.9305        | 808.4689        | 1598.9040      | 799.9556         | 1597.9200       | 799.4636         | 15 |
| 7  | <b>814.4193</b>  | 407.7133        | 796.4087         | 398.7080         | E    | 1516.8621        | 758.9347        | 1499.8356      | 750.4214         | 1498.8516       | 749.9294         | 14 |
| 8  | 915.4670         | 458.2371        | 897.4564         | 449.2318         | T    | 1387.8195        | 694.4134        | 1370.7930      | 685.9001         | 1369.8090       | 685.4081         | 13 |
| 9  | 1078.5303        | 539.7688        | <b>1060.5197</b> | 530.7635         | Y    | 1286.7719        | 643.8896        | 1269.7453      | 635.3763         | 1268.7613       | 634.8843         | 12 |
| 10 | <b>1177.5987</b> | 589.3030        | 1159.5881        | <b>580.2977</b>  | V    | <b>1123.7085</b> | 562.3579        | 1106.6820      | 553.8446         | 1105.6980       | 553.3526         | 11 |
| 11 | <b>1290.6828</b> | 645.8450        | <b>1272.6722</b> | 636.8397         | L    | <b>1024.6401</b> | 512.8237        | 1007.6136      | 504.3104         | 1006.6295       | 503.8184         | 10 |
| 12 | <b>1377.7148</b> | 689.3610        | <b>1359.7042</b> | 680.3558         | S    | <b>911.5560</b>  | 456.2817        | 894.5295       | 447.7684         | 893.5455        | 447.2764         | 9  |
| 13 | <b>1490.7989</b> | 745.9031        | <b>1472.7883</b> | 736.8978         | I    | <b>824.5240</b>  | 412.7656        | 807.4975       | 404.2524         | 806.5135        | 403.7604         | 8  |
| 14 | <b>1603.8829</b> | 802.4451        | <b>1585.8724</b> | 793.4398         | I    | <b>711.4400</b>  | 356.2236        | 694.4134       | 347.7103         | <b>693.4294</b> | 347.2183         | 7  |
| 15 | <b>1700.9357</b> | 850.9715        | <b>1682.9251</b> | 841.9662         | P    | <b>598.3559</b>  | 299.6816        | 581.3293       | 291.1683         | <b>580.3453</b> | 290.6763         | 6  |
| 16 | <b>1787.9677</b> | 894.4875        | 1769.9571        | 885.4822         | S    | <b>501.3031</b>  | 251.1552        | 484.2766       | 242.6419         | 483.2926        | 242.1499         | 5  |
| 17 | 1844.9892        | 922.9982        | 1826.9786        | 913.9929         | G    | <b>414.2711</b>  | 207.6392        | 397.2445       | 199.1259         |                 |                  | 4  |
| 18 | 1942.0419        | 971.5246        | 1924.0314        | 962.5193         | P    | <b>357.2496</b>  | 179.1285        | 340.2231       | 170.6152         |                 |                  | 3  |

|    |           |           |           |           |   |          |          |          |          |  |  |   |
|----|-----------|-----------|-----------|-----------|---|----------|----------|----------|----------|--|--|---|
| 19 | 2055.1260 | 1028.0666 | 2037.1154 | 1019.0614 | L | 260.1969 | 130.6021 | 243.1703 | 122.0888 |  |  | 2 |
| 20 |           |           |           |           | K | 147.1128 | 74.0600  | 130.0863 | 65.5468  |  |  | 1 |

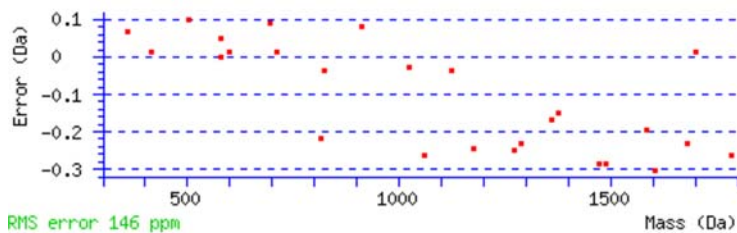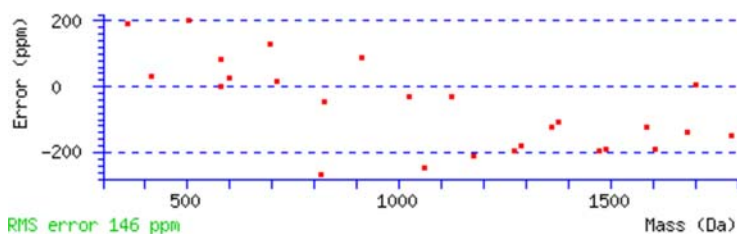

NCBI **BLAST** search of [SLLTEVETYVLSIIPSGPLK](#)

(Parameters: blastp, nr protein database, expect=20000, no filter, PAM30)

Other BLAST [web gateways](#)

#### All matches to this query

| Score | Mr(calc): | Delta  | Sequence                                |
|-------|-----------|--------|-----------------------------------------|
| 78.9  | 2200.2242 | 0.0002 | <a href="#">SLLTEVETYVLSIIPSGPLK</a>    |
| 14.8  | 2200.1841 | 0.0403 | <a href="#">RLASTLLRVSSLLVHNDAR</a>     |
| 12.3  | 2199.1899 | 1.0346 | <a href="#">AAAGAVRLLVVQPQPEEQPPK</a>   |
| 10.3  | 2199.1899 | 1.0346 | <a href="#">AAAGAVRLLVVQPQPEEQPPK</a>   |
| 10.3  | 2199.1899 | 1.0346 | <a href="#">AAAGAVRLLVVQPQPEEQPPK</a>   |
| 8.1   | 2199.2099 | 1.0146 | <a href="#">GMAAPGPPQLPWLRLGPRLR</a>    |
| 7.2   | 2198.1824 | 2.0421 | <a href="#">NSILAPAIKTNVHEVKASVK</a>    |
| 6.7   | 2200.2055 | 0.0190 | <a href="#">TLLAVGCGAAGVGIVALPLGLAK</a> |
| 6.6   | 2198.1976 | 2.0268 | <a href="#">YTRPTPVQKHAIPIIKEK</a>      |
| 6.6   | 2198.1976 | 2.0268 | <a href="#">YTRPTPVQKHAIPIIKEK</a>      |

Mascot: <http://www.matrixscience.com/>



**MASCOT SCIENCE** Mascot Search Results

**Peptide View**

MS/MS Fragmentation of **SLLTEVETYVLSIIPSGPLKAEIAQR**  
 Found in **MI**, NYMC X-181

Match to Query 4707: 2868.607872 from(957.209900,3+) intensity(598344.0000)  
 Title: B111206\_007.07129.07129.3  
 Data file B111206\_007.mgf.mascot

Click mouse within plot area to zoom in by factor of two about that point

Or, Plot from  to  Da

Label all possible matches  Label matches used for scoring

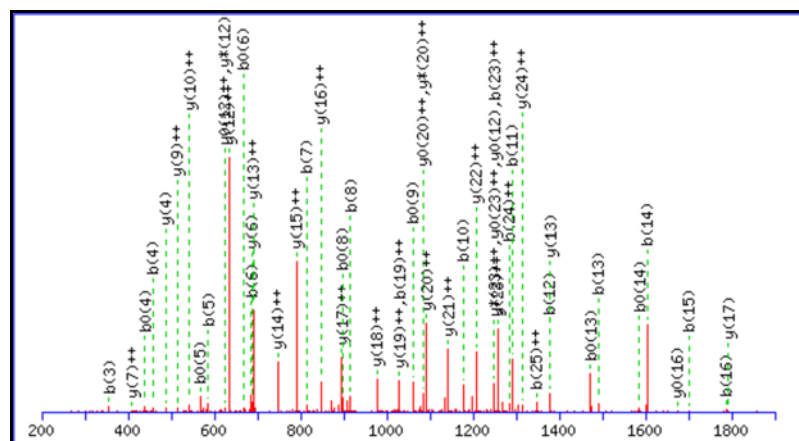

Monoisotopic mass of neutral peptide  $M_r(\text{calc})$ : 2868.5848  
 Fixed modifications: Carbamidomethyl (C) (apply to specified residues or termini only)  
 Variable modifications:  
 N-term : Acetyl (Protein N-term)  
 Ions Score: 122 Expect: 3.8e-11  
 Matches : 52/254 fragment ions using 62 most intense peaks ([help](#))

| #  | b                | b <sup>++</sup>  | b*        | b <sup>*++</sup> | b <sup>0</sup>   | b <sup>0++</sup> | Seq. | y                | y <sup>++</sup>  | y*        | y <sup>*++</sup> | y <sup>0</sup>   | y <sup>0++</sup> | #  |
|----|------------------|------------------|-----------|------------------|------------------|------------------|------|------------------|------------------|-----------|------------------|------------------|------------------|----|
| 1  | 130.0499         | 65.5286          |           |                  | 112.0393         | 56.5233          | S    |                  |                  |           |                  |                  |                  | 26 |
| 2  | 243.1339         | 122.0706         |           |                  | 225.1234         | 113.0653         | L    | 2740.5495        | 1370.7784        | 2723.5230 | 1362.2651        | 2722.5389        | 1361.7731        | 25 |
| 3  | <b>356.2180</b>  | 178.6126         |           |                  | 338.2074         | 169.6074         | L    | 2627.4654        | <b>1314.2364</b> | 2610.4389 | 1305.7231        | 2609.4549        | 1305.2311        | 24 |
| 4  | <b>457.2657</b>  | 229.1365         |           |                  | <b>439.2551</b>  | 220.1312         | T    | 2514.3814        | <b>1257.6943</b> | 2497.3548 | <b>1249.1811</b> | 2496.3708        | <b>1248.6890</b> | 23 |
| 5  | <b>586.3083</b>  | 293.6578         |           |                  | <b>568.2977</b>  | 284.6525         | E    | 2413.3337        | <b>1207.1705</b> | 2396.3072 | 1198.6572        | 2395.3231        | 1198.1652        | 22 |
| 6  | <b>685.3767</b>  | 343.1920         |           |                  | <b>667.3661</b>  | 334.1867         | V    | 2284.2911        | <b>1142.6492</b> | 2267.2646 | 1134.1359        | 2266.2805        | 1133.6439        | 21 |
| 7  | <b>814.4193</b>  | 407.7133         |           |                  | 796.4087         | 398.7080         | E    | 2185.2227        | <b>1093.1150</b> | 2168.1961 | <b>1084.6017</b> | 2167.2121        | <b>1084.1097</b> | 20 |
| 8  | <b>915.4670</b>  | 458.2371         |           |                  | <b>897.4564</b>  | 449.2318         | T    | 2056.1801        | <b>1028.5937</b> | 2039.1536 | 1020.0804        | 2038.1695        | 1019.5884        | 19 |
| 9  | 1078.5303        | 539.7688         |           |                  | <b>1060.5197</b> | 530.7635         | Y    | 1955.1324        | <b>978.0699</b>  | 1938.1059 | 969.5566         | 1937.1219        | 969.0646         | 18 |
| 10 | <b>1177.5987</b> | 589.3030         |           |                  | 1159.5881        | 580.2977         | V    | <b>1792.0691</b> | <b>896.5382</b>  | 1775.0425 | 888.0249         | 1774.0585        | 887.5329         | 17 |
| 11 | <b>1290.6828</b> | 645.8450         |           |                  | 1272.6722        | 636.8397         | L    | 1693.0007        | <b>847.0040</b>  | 1675.9741 | 838.4907         | <b>1674.9901</b> | 837.9987         | 16 |
| 12 | <b>1377.7148</b> | 689.3610         |           |                  | 1359.7042        | 680.3558         | S    | 1579.9166        | <b>790.4619</b>  | 1562.8901 | 781.9487         | 1561.9061        | 781.4567         | 15 |
| 13 | <b>1490.7989</b> | 745.9031         |           |                  | <b>1472.7883</b> | 736.8978         | I    | 1492.8846        | <b>746.9459</b>  | 1475.8580 | 738.4327         | 1474.8740        | 737.9407         | 14 |
| 14 | <b>1603.8829</b> | 802.4451         |           |                  | <b>1585.8724</b> | 793.4398         | I    | <b>1379.8005</b> | <b>690.4039</b>  | 1362.7740 | 681.8906         | 1361.7900        | 681.3986         | 13 |
| 15 | <b>1700.9357</b> | 850.9715         |           |                  | 1682.9251        | 841.9662         | P    | 1266.7165        | <b>633.8619</b>  | 1249.6899 | <b>625.3486</b>  | <b>1248.7059</b> | <b>624.8566</b>  | 12 |
| 16 | <b>1787.9677</b> | 894.4875         |           |                  | 1769.9571        | 885.4822         | S    | 1169.6637        | 585.3355         | 1152.6371 | 576.8222         | 1151.6531        | 576.3302         | 11 |
| 17 | 1844.9892        | 922.9982         |           |                  | 1826.9786        | 913.9929         | G    | 1082.6317        | <b>541.8195</b>  | 1065.6051 | 533.3062         | 1064.6211        | 532.8142         | 10 |
| 18 | 1942.0419        | 971.5246         |           |                  | 1924.0314        | 962.5193         | P    | 1025.6102        | <b>513.3087</b>  | 1008.5837 | 504.7955         | 1007.5996        | 504.3035         | 9  |
| 19 | 2055.1260        | <b>1028.0666</b> |           |                  | 2037.1154        | 1019.0614        | L    | 928.5574         | 464.7824         | 911.5309  | 456.2691         | 910.5469         | 455.7771         | 8  |
| 20 | 2183.2210        | 1092.1141        | 2166.1944 | 1083.6008        | 2165.2104        | 1083.1088        | K    | 815.4734         | <b>408.2403</b>  | 798.4468  | 399.7271         | 797.4628         | 399.2350         | 7  |
| 21 | 2254.2581        | 1127.6327        | 2237.2315 | 1119.1194        | 2236.2475        | 1118.6274        | A    | <b>687.3784</b>  | 344.1928         | 670.3519  | 335.6796         | 669.3679         | 335.1876         | 6  |
| 22 | 2383.3007        | 1192.1540        | 2366.2741 | 1183.6407        | 2365.2901        | 1183.1487        | E    | 616.3413         | 308.6743         | 599.3148  | 300.1610         | 598.3307         | 299.6690         | 5  |
| 23 | 2496.3847        | <b>1248.6960</b> | 2479.3582 | 1240.1827        | 2478.3742        | 1239.6907        | I    | <b>487.2987</b>  | 244.1530         | 470.2722  | 235.6397         |                  |                  | 4  |
| 24 | 2567.4219        | <b>1284.2146</b> | 2550.3953 | 1275.7013        | 2549.4113        | 1275.2093        | A    | 374.2146         | 187.6110         | 357.1881  | 179.0977         |                  |                  | 3  |
| 25 | 2695.4804        | <b>1348.2439</b> | 2678.4539 | 1339.7306        | 2677.4699        | 1339.2386        | Q    | 303.1775         | 152.0924         | 286.1510  | 143.5791         |                  |                  | 2  |
| 26 |                  |                  |           |                  |                  |                  | R    | 175.1190         | 88.0631          | 158.0924  | 79.5498          |                  |                  | 1  |

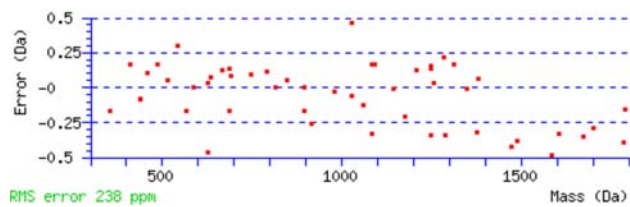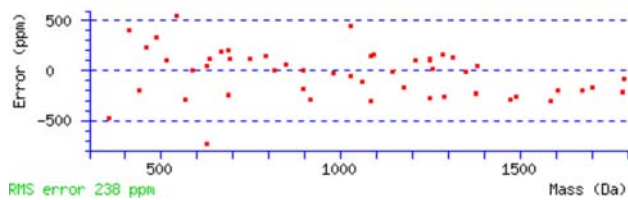

NCBI **BLAST** search of [SLLTEVETYVLSIIPSGPLKAEIAQR](#)

(Parameters: blastp, nr protein database, expect=20000, no filter, PAM30)

Other BLAST [web gateways](#)

**All matches to this query**

| Score | Mr(calc): | Delta   | Sequence                                      |
|-------|-----------|---------|-----------------------------------------------|
| 121.7 | 2868.5848 | 0.0231  | <a href="#">SLLTEVETYVLSIIPSGPLKAEIAQR</a>    |
| 10.0  | 2868.5722 | 0.0357  | <a href="#">WGPGSHLA AVR SAAELRLLAELLNAXR</a> |
| 5.2   | 2866.6006 | 2.0072  | <a href="#">MVHTTSPLLLLLLLSLALVAPLSAR</a>     |
| 3.2   | 2866.6006 | 2.0072  | <a href="#">MVHTTSPLLLLLLLSLALVAPLSAR</a>     |
| 3.2   | 2866.6006 | 2.0072  | <a href="#">MVHTTSPLLLLLLLSLALVAPLSAR</a>     |
| 2.6   | 2866.5569 | 2.0510  | <a href="#">LVAVAQSGPLR VESLNTVKDLP LPR</a>   |
| 2.6   | 2866.5569 | 2.0510  | <a href="#">LVAVAQSGPLR VESLNTVKDLP LPR</a>   |
| 2.0   | 2868.6340 | -0.0261 | <a href="#">LKFMTTWIIFVISA AVALILTNTFR</a>    |
| 2.0   | 2867.5718 | 1.0361  | <a href="#">IIEDLVDLIDKLTALATFGNIMHAK</a>     |
| 0.6   | 2868.6155 | -0.0077 | <a href="#">EIQQMAICMGIHTVLA VKXFLVKK</a>     |

**Mascot:** <http://www.matrixscience.com/>

# MASCOT SCIENCE Mascot Search Results

## Peptide View

MS/MS Fragmentation of **SLLTEVETPIR**

Found in **M2**, NYMC X-181

Match to Query 1013: 1256.696874 from(629.355713,2+) intensity(555767.0000)

Title: B111206\_007.03366.03366.2

Data file B111206\_007.mgf.mascot

Click mouse within plot area to zoom in by factor of two about that point

Or, Plot from  to  Da

Label all possible matches  Label matches used for scoring

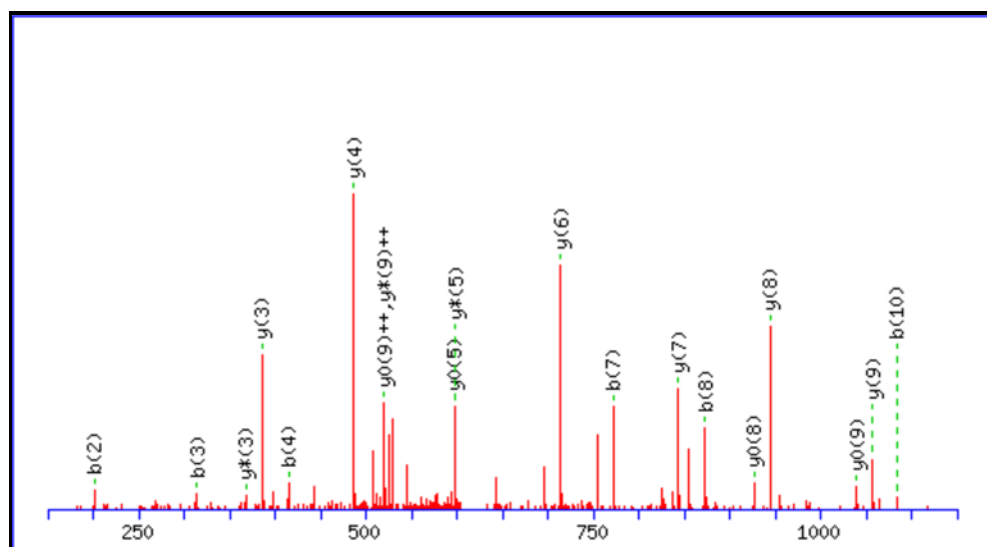

Monoisotopic mass of neutral peptide Mr(calc): 1256.6976

Fixed modifications: Carbamidomethyl (C) (apply to specified residues or termini only)

Ions Score: 60 Expect: 2.5e-05

Matches : 19/94 fragment ions using 20 most intense peaks ([help](#))

| #  | b                | b <sup>++</sup> | b <sup>0</sup> | b <sup>0++</sup> | Seq. | y                | y <sup>++</sup> | y*              | y <sup>*++</sup> | y <sup>0</sup>   | y <sup>0++</sup> | #  |
|----|------------------|-----------------|----------------|------------------|------|------------------|-----------------|-----------------|------------------|------------------|------------------|----|
| 1  | 88.0393          | 44.5233         | 70.0287        | 35.5180          | S    |                  |                 |                 |                  |                  |                  | 11 |
| 2  | <b>201.1234</b>  | 101.0653        | 183.1128       | 92.0600          | L    | 1170.6729        | 585.8401        | 1153.6463       | 577.3268         | 1152.6623        | 576.8348         | 10 |
| 3  | <b>314.2074</b>  | 157.6074        | 296.1969       | 148.6021         | L    | <b>1057.5888</b> | 529.2980        | 1040.5623       | <b>520.7848</b>  | <b>1039.5782</b> | <b>520.2928</b>  | 9  |
| 4  | <b>415.2551</b>  | 208.1312        | 397.2445       | 199.1259         | T    | <b>944.5047</b>  | 472.7560        | 927.4782        | 464.2427         | <b>926.4942</b>  | 463.7507         | 8  |
| 5  | 544.2977         | 272.6525        | 526.2871       | 263.6472         | E    | <b>843.4571</b>  | 422.2322        | 826.4305        | 413.7189         | 825.4465         | 413.2269         | 7  |
| 6  | 643.3661         | 322.1867        | 625.3556       | 313.1814         | V    | <b>714.4145</b>  | 357.7109        | 697.3879        | 349.1976         | 696.4039         | 348.7056         | 6  |
| 7  | <b>772.4087</b>  | 386.7080        | 754.3981       | 377.7027         | E    | 615.3461         | 308.1767        | <b>598.3195</b> | 299.6634         | <b>597.3355</b>  | 299.1714         | 5  |
| 8  | <b>873.4564</b>  | 437.2318        | 855.4458       | 428.2266         | T    | <b>486.3035</b>  | 243.6554        | 469.2769        | 235.1421         | 468.2929         | 234.6501         | 4  |
| 9  | 970.5092         | 485.7582        | 952.4986       | 476.7529         | P    | <b>385.2558</b>  | 193.1315        | <b>368.2292</b> | 184.6183         |                  |                  | 3  |
| 10 | <b>1083.5932</b> | 542.3002        | 1065.5827      | 533.2950         | I    | 288.2030         | 144.6051        | 271.1765        | 136.0919         |                  |                  | 2  |
| 11 |                  |                 |                |                  | R    | 175.1190         | 88.0631         | 158.0924        | 79.5498          |                  |                  | 1  |

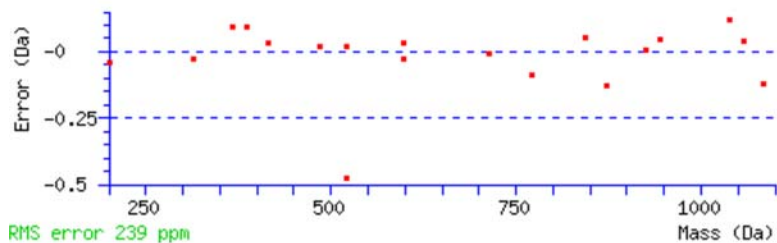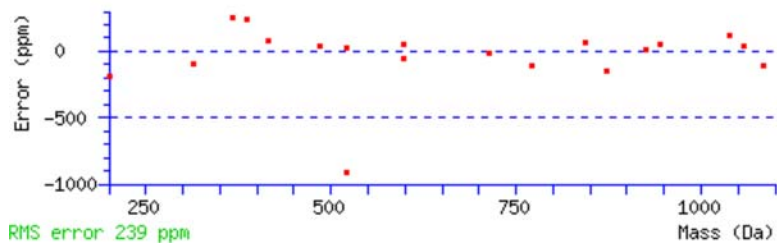

NCBI **BLAST** search of [SLLTEVETPIR](#)

(Parameters: blastp, nr protein database, expect=20000, no filter, PAM30)

Other BLAST [web gateways](#)

#### All matches to this query

| Score | Mr(calc): | Delta   | Sequence                      |
|-------|-----------|---------|-------------------------------|
| 60.2  | 1256.6976 | -0.0007 | <a href="#">SLLTEVETPIR</a>   |
| 10.4  | 1256.7088 | -0.0119 | <a href="#">VTIRELQQLR</a>    |
| 10.1  | 1256.6724 | 0.0245  | <a href="#">AEREQLELLR</a>    |
| 9.3   | 1256.6798 | 0.0170  | <a href="#">AEMDILTVPIR</a>   |
| 9.2   | 1256.6724 | 0.0244  | <a href="#">AIEAVKNEVER</a>   |
| 8.7   | 1256.6724 | 0.0244  | <a href="#">EAESKLGASPLR</a>  |
| 8.5   | 1256.7088 | -0.0119 | <a href="#">AELALEEARKK</a>   |
| 7.6   | 1256.6837 | 0.0132  | <a href="#">KGQTAVAGQAAQK</a> |
| 6.7   | 1256.6724 | 0.0245  | <a href="#">AELELREELR</a>    |
| 6.7   | 1256.7088 | -0.0119 | <a href="#">LSLEQSIIVAAR</a>  |

Mascot: <http://www.matrixscience.com/>

# MASCOT SCIENCE Mascot Search Results

## Peptide View

MS/MS Fragmentation of **SLLTEVETPIR**

Found in **M2**, NYMC X-181

Match to Query 1136: 1298.708226 from(650.361389,2+) intensity(2209400.0000)

Title: B111206\_007.04297.04297.2

Data file B111206\_007.mgf.mascot

Click mouse within plot area to zoom in by factor of two about that point

Or, Plot from  to  Da

Label all possible matches  Label matches used for scoring

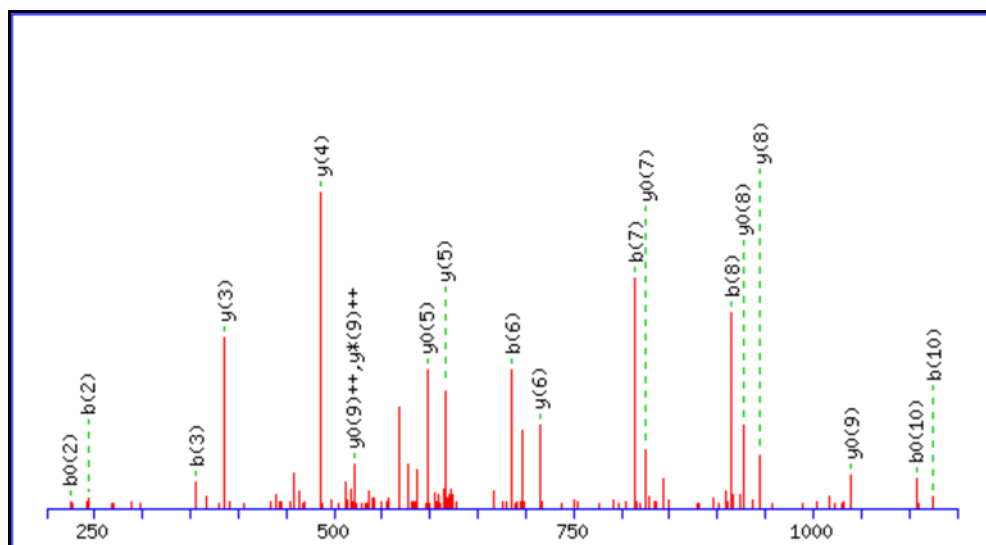

Monoisotopic mass of neutral peptide **Mr(calc):** 1298.7082

**Fixed modifications:** Carbamidomethyl (C) (apply to specified residues or termini only)

**Variable modifications:**

**N-term :** Acetyl (Protein N-term)

**Ions Score:** 57 **Expect:** 0.0002

**Matches :** 19/94 fragment ions using 20 most intense peaks ([help](#))

| #  | b                | b <sup>++</sup> | b <sup>0</sup>   | b <sup>0++</sup> | Seq. | y               | y <sup>++</sup> | y*        | y <sup>*++</sup> | y <sup>0</sup>   | y <sup>0++</sup> | #  |
|----|------------------|-----------------|------------------|------------------|------|-----------------|-----------------|-----------|------------------|------------------|------------------|----|
| 1  | 130.0499         | 65.5286         | 112.0393         | 56.5233          | S    |                 |                 |           |                  |                  |                  | 11 |
| 2  | <b>243.1339</b>  | 122.0706        | <b>225.1234</b>  | 113.0653         | L    | 1170.6729       | 585.8401        | 1153.6463 | 577.3268         | 1152.6623        | 576.8348         | 10 |
| 3  | <b>356.2180</b>  | 178.6126        | 338.2074         | 169.6074         | L    | 1057.5888       | 529.2980        | 1040.5623 | <b>520.7848</b>  | <b>1039.5782</b> | <b>520.2928</b>  | 9  |
| 4  | 457.2657         | 229.1365        | 439.2551         | 220.1312         | T    | <b>944.5047</b> | 472.7560        | 927.4782  | 464.2427         | <b>926.4942</b>  | 463.7507         | 8  |
| 5  | 586.3083         | 293.6578        | 568.2977         | 284.6525         | E    | 843.4571        | 422.2322        | 826.4305  | 413.7189         | <b>825.4465</b>  | 413.2269         | 7  |
| 6  | <b>685.3767</b>  | 343.1920        | 667.3661         | 334.1867         | V    | <b>714.4145</b> | 357.7109        | 697.3879  | 349.1976         | 696.4039         | 348.7056         | 6  |
| 7  | <b>814.4193</b>  | 407.7133        | 796.4087         | 398.7080         | E    | <b>615.3461</b> | 308.1767        | 598.3195  | 299.6634         | <b>597.3355</b>  | 299.1714         | 5  |
| 8  | <b>915.4670</b>  | 458.2371        | 897.4564         | 449.2318         | T    | <b>486.3035</b> | 243.6554        | 469.2769  | 235.1421         | 468.2929         | 234.6501         | 4  |
| 9  | 1012.5197        | 506.7635        | 994.5092         | 497.7582         | P    | <b>385.2558</b> | 193.1315        | 368.2292  | 184.6183         |                  |                  | 3  |
| 10 | <b>1125.6038</b> | 563.3055        | <b>1107.5932</b> | 554.3002         | I    | 288.2030        | 144.6051        | 271.1765  | 136.0919         |                  |                  | 2  |
| 11 |                  |                 |                  |                  | R    | 175.1190        | 88.0631         | 158.0924  | 79.5498          |                  |                  | 1  |

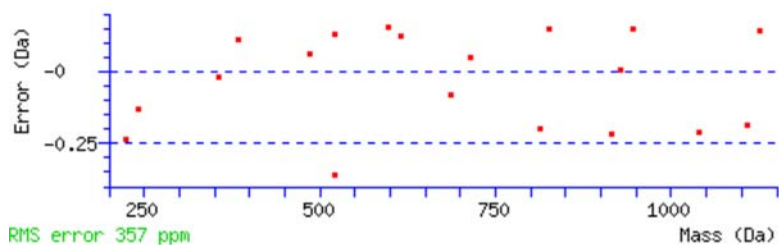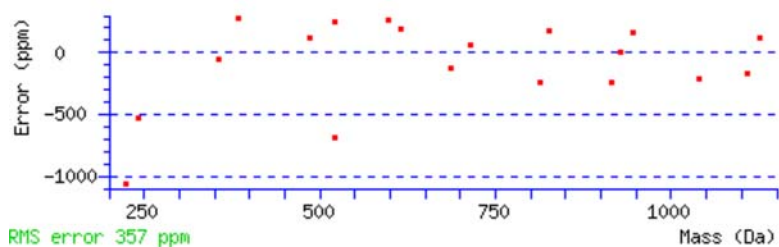

NCBI **BLAST** search of [SLLTEVETPIR](#)

(Parameters: blastp, nr protein database, expect=20000, no filter, PAM30)

Other BLAST [web gateways](#)

#### All matches to this query

| Score | Mr(calc): | Delta   | Sequence                       |
|-------|-----------|---------|--------------------------------|
| 56.7  | 1298.7082 | 0.0001  | <a href="#">SLLTEVETPIR</a>    |
| 16.2  | 1298.7241 | -0.0159 | <a href="#">MRPTERLQLR</a>     |
| 15.9  | 1298.6942 | 0.0140  | <a href="#">IQENVRNAIGGK</a>   |
| 15.3  | 1297.7241 | 0.9841  | <a href="#">LQIQINLDAIR</a>    |
| 14.9  | 1298.6990 | 0.0093  | <a href="#">GRGRGLGCTPLR</a>   |
| 14.7  | 1297.7241 | 0.9841  | <a href="#">LQIQINLDAIR</a>    |
| 11.0  | 1297.6990 | 1.0093  | <a href="#">LENKKPNLEGR</a>    |
| 10.9  | 1298.6942 | 0.0140  | <a href="#">SQLAGDLIQQAR</a>   |
| 10.8  | 1298.7194 | -0.0112 | <a href="#">IETEISNKPLR</a>    |
| 10.2  | 1297.6990 | 1.0092  | <a href="#">SSLPVSGGSAPLAR</a> |

Mascot: <http://www.matrixscience.com/>

**X187**  
**N-terminal peptide spectra**

**Mascot Search Results**

**Peptide View**

MS/MS Fragmentation of **MDVNPTLLFLK**  
 Found in **PBI**, NYMC X-187

Match to Query 1582: 1347.711522 from(674.863037,2+) intensity(826449.0000)  
 Title: B111206\_009.05064.05064.2  
 Data file B111206\_009.mgf.mascot

Click mouse within plot area to zoom in by factor of two about that point

Or, Plot from  to  Da   
 Label all possible matches  Label matches used for scoring

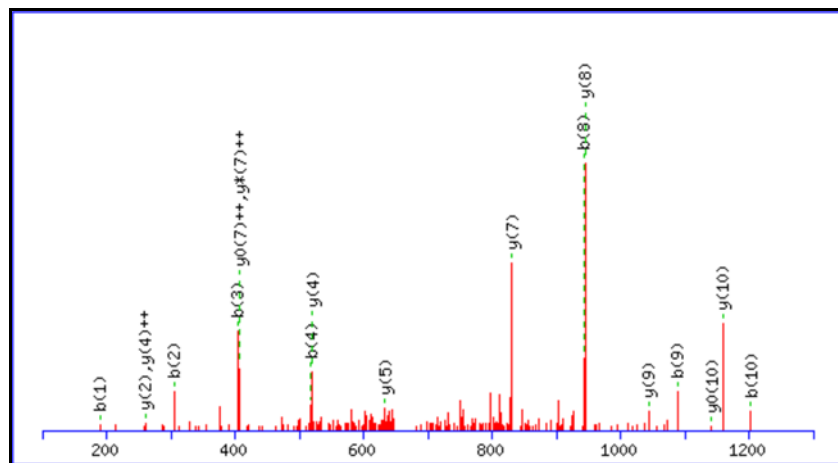

**Monoisotopic mass of neutral peptide Mr(calc):** 1347.7108  
**Fixed modifications:** Carbamidomethyl (C) (apply to specified residues or termini only)  
**Variable modifications:**  
 N-term : Acetyl (Protein N-term)  
 M1 : Oxidation (M), with neutral losses 0.0000 (shown in table), 63.9983  
**Ions Score:** 72 **Expect:** 1.1e-05  
**Matches :** 19/154 fragment ions using 21 most intense peaks ([help](#))

| #  | b         | b <sup>++</sup> | b*        | b <sup>*++</sup> | b <sup>0</sup> | b <sup>0++</sup> | Seq. | y         | y <sup>++</sup> | y*        | y <sup>*++</sup> | y <sup>0</sup> | y <sup>0++</sup> | #  |
|----|-----------|-----------------|-----------|------------------|----------------|------------------|------|-----------|-----------------|-----------|------------------|----------------|------------------|----|
| 1  | 190.0532  | 95.5303         |           |                  |                |                  | M    |           |                 |           |                  |                |                  | 11 |
| 2  | 305.0802  | 153.0437        |           |                  | 287.0696       | 144.0384         | D    | 1159.6721 | 580.3397        | 1142.6456 | 571.8264         | 1141.6616      | 571.3344         | 10 |
| 3  | 404.1486  | 202.5779        |           |                  | 386.1380       | 193.5727         | V    | 1044.6452 | 522.8262        | 1027.6186 | 514.3130         | 1026.6346      | 513.8210         | 9  |
| 4  | 518.1915  | 259.5994        | 501.1650  | 251.0861         | 500.1810       | 250.5941         | N    | 945.5768  | 473.2920        | 928.5502  | 464.7788         | 927.5662       | 464.2867         | 8  |
| 5  | 615.2443  | 308.1258        | 598.2177  | 299.6125         | 597.2337       | 299.1205         | P    | 831.5339  | 416.2706        | 814.5073  | 407.7573         | 813.5233       | 407.2653         | 7  |
| 6  | 716.2920  | 358.6496        | 699.2654  | 350.1363         | 698.2814       | 349.6443         | T    | 734.4811  | 367.7442        | 717.4545  | 359.2309         | 716.4705       | 358.7389         | 6  |
| 7  | 829.3760  | 415.1917        | 812.3495  | 406.6784         | 811.3655       | 406.1864         | L    | 633.4334  | 317.2203        | 616.4069  | 308.7071         |                |                  | 5  |
| 8  | 942.4601  | 471.7337        | 925.4335  | 463.2204         | 924.4495       | 462.7284         | L    | 520.3493  | 260.6783        | 503.3228  | 252.1650         |                |                  | 4  |
| 9  | 1089.5285 | 545.2679        | 1072.5020 | 536.7546         | 1071.5179      | 536.2626         | F    | 407.2653  | 204.1363        | 390.2387  | 195.6230         |                |                  | 3  |
| 10 | 1202.6126 | 601.8099        | 1185.5860 | 593.2967         | 1184.6020      | 592.8046         | L    | 260.1969  | 130.6021        | 243.1703  | 122.0888         |                |                  | 2  |
| 11 |           |                 |           |                  |                |                  | K    | 147.1128  | 74.0600         | 130.0863  | 65.5468          |                |                  | 1  |

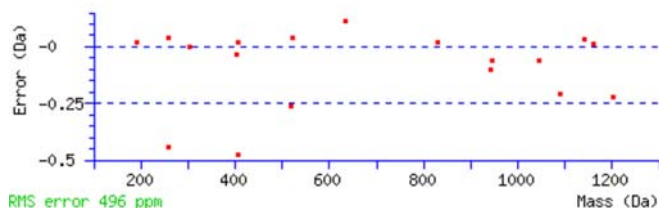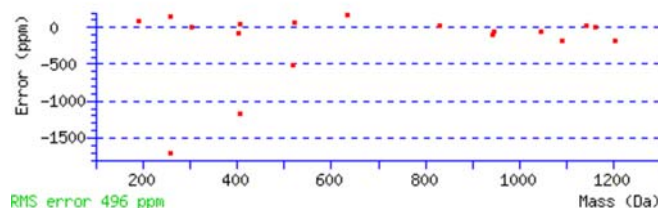

NCBI BLAST search of [MDVNPTLLFLK](#)  
 (Parameters: blastp, nr protein database, expect=20000, no filter, PAM30)  
 Other BLAST [web gateways](#)

All matches to this query



| Score | Mr(calc): | Delta   | Sequence                      |
|-------|-----------|---------|-------------------------------|
| 72.3  | 1347.7108 | 0.0007  | <a href="#">MDVNPTLLFLK</a>   |
| 19.2  | 1347.6955 | 0.0160  | <a href="#">NGTILVDNMLIK</a>  |
| 11.9  | 1346.7115 | 1.0000  | <a href="#">NGTILVDNMLIK</a>  |
| 11.0  | 1347.7254 | -0.0139 | <a href="#">MKIMGEVLNGIK</a>  |
| 8.7   | 1347.6895 | 0.0220  | <a href="#">TSSQTFHSGRIK</a>  |
| 7.9   | 1345.6812 | 2.0303  | <a href="#">KCLNDGVHLYK</a>   |
| 7.7   | 1347.7068 | 0.0047  | <a href="#">SGDPKDTKMLIK</a>  |
| 7.3   | 1347.6922 | 0.0193  | <a href="#">AALDFVVEEDLK</a>  |
| 5.9   | 1347.6955 | 0.0160  | <a href="#">NVLDQIKEMLK</a>   |
| 4.8   | 1347.6881 | 0.0234  | <a href="#">NTAGTIGKSQELK</a> |

Mascot: <http://www.matrixscience.com/>

# MASCOT SCIENCE Mascot Search Results

## Peptide View

MS/MS Fragmentation of **SLLTEVETYVLSIIPSGPLK**

Found in **M1**, NYMC X-187

Match to Query 3612: 2158.213720 from(1080.114136,2+) intensity(188523.0000)

Title: B111206\_009.07409.07409.2

Data file B111206\_009.mgf.mascot

Click mouse within plot area to zoom in by factor of two about that point

Or, Plot from  to  Da

Label all possible matches  Label matches used for scoring

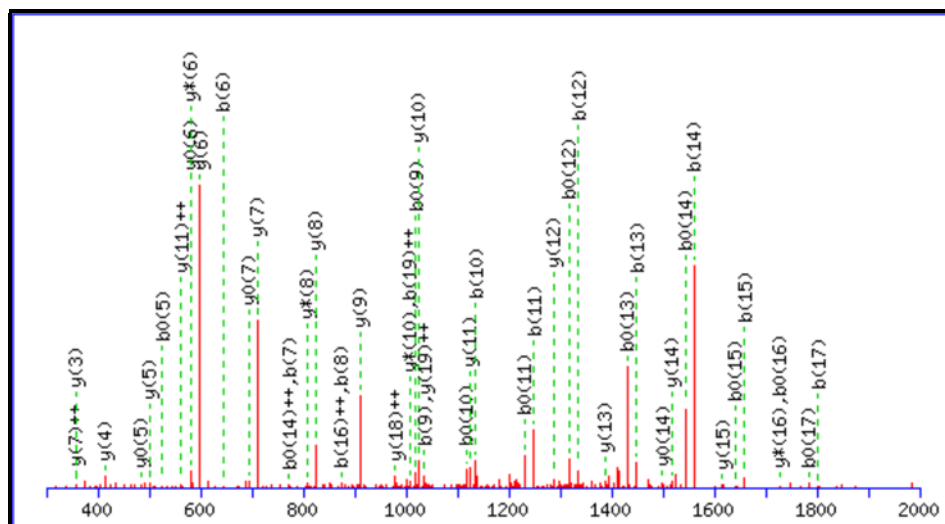

Monoisotopic mass of neutral peptide  $M_r(\text{calc})$ : 2158.2137

Fixed modifications: Carbamidomethyl (C) (apply to specified residues or termini only)

Ions Score: 47 Expect: 0.00031

Matches : 49/182 fragment ions using 122 most intense peaks ([help](#))

| #  | b         | b <sup>++</sup> | b <sup>0</sup> | b <sup>0++</sup> | Seq. | y         | y <sup>++</sup> | y <sup>*</sup> | y <sup>*++</sup> | y <sup>0</sup> | y <sup>0++</sup> | #  |
|----|-----------|-----------------|----------------|------------------|------|-----------|-----------------|----------------|------------------|----------------|------------------|----|
| 1  | 88.0393   | 44.5233         | 70.0287        | 35.5180          | S    |           |                 |                |                  |                |                  | 20 |
| 2  | 201.1234  | 101.0653        | 183.1128       | 92.0600          | L    | 2072.1889 | 1036.5981       | 2055.1624      | 1028.0848        | 2054.1784      | 1027.5928        | 19 |
| 3  | 314.2074  | 157.6074        | 296.1969       | 148.6021         | L    | 1959.1049 | 980.0561        | 1942.0783      | 971.5428         | 1941.0943      | 971.0508         | 18 |
| 4  | 415.2551  | 208.1312        | 397.2445       | 199.1259         | T    | 1846.0208 | 923.5140        | 1828.9943      | 915.0008         | 1828.0102      | 914.5088         | 17 |
| 5  | 544.2977  | 272.6525        | 526.2871       | 263.6472         | E    | 1744.9731 | 872.9902        | 1727.9466      | 864.4769         | 1726.9626      | 863.9849         | 16 |
| 6  | 643.3661  | 322.1867        | 625.3556       | 313.1814         | V    | 1615.9305 | 808.4689        | 1598.9040      | 799.9556         | 1597.9200      | 799.4636         | 15 |
| 7  | 772.4087  | 386.7080        | 754.3981       | 377.7027         | E    | 1516.8621 | 758.9347        | 1499.8356      | 750.4214         | 1498.8516      | 749.9294         | 14 |
| 8  | 873.4564  | 437.2318        | 855.4458       | 428.2266         | T    | 1387.8195 | 694.4134        | 1370.7930      | 685.9001         | 1369.8090      | 685.4081         | 13 |
| 9  | 1036.5197 | 518.7635        | 1018.5092      | 509.7582         | Y    | 1286.7719 | 643.8896        | 1269.7453      | 635.3763         | 1268.7613      | 634.8843         | 12 |
| 10 | 1135.5881 | 568.2977        | 1117.5776      | 559.2924         | V    | 1123.7085 | 562.3579        | 1106.6820      | 553.8446         | 1105.6980      | 553.3526         | 11 |
| 11 | 1248.6722 | 624.8397        | 1230.6616      | 615.8345         | L    | 1024.6401 | 512.8237        | 1007.6136      | 504.3104         | 1006.6295      | 503.8184         | 10 |
| 12 | 1335.7042 | 668.3558        | 1317.6937      | 659.3505         | S    | 911.5560  | 456.2817        | 894.5295       | 447.7684         | 893.5455       | 447.2764         | 9  |
| 13 | 1448.7883 | 724.8978        | 1430.7777      | 715.8925         | I    | 824.5240  | 412.7656        | 807.4975       | 404.2524         | 806.5135       | 403.7604         | 8  |
| 14 | 1561.8724 | 781.4398        | 1543.8618      | 772.4345         | I    | 711.4400  | 356.2236        | 694.4134       | 347.7103         | 693.4294       | 347.2183         | 7  |
| 15 | 1658.9251 | 829.9662        | 1640.9146      | 820.9609         | P    | 598.3559  | 299.6816        | 581.3293       | 291.1683         | 580.3453       | 290.6763         | 6  |
| 16 | 1745.9571 | 873.4822        | 1727.9466      | 864.4769         | S    | 501.3031  | 251.1552        | 484.2766       | 242.6419         | 483.2926       | 242.1499         | 5  |
| 17 | 1802.9786 | 901.9929        | 1784.9680      | 892.9877         | G    | 414.2711  | 207.6392        | 397.2445       | 199.1259         |                |                  | 4  |
| 18 | 1900.0314 | 950.5193        | 1882.0208      | 941.5140         | P    | 357.2496  | 179.1285        | 340.2231       | 170.6152         |                |                  | 3  |
| 19 | 2013.1154 | 1007.0614       | 1995.1049      | 998.0561         | L    | 260.1969  | 130.6021        | 243.1703       | 122.0888         |                |                  | 2  |

|    |  |  |  |  |          |          |         |          |         |  |  |          |
|----|--|--|--|--|----------|----------|---------|----------|---------|--|--|----------|
| 20 |  |  |  |  | <b>K</b> | 147.1128 | 74.0600 | 130.0863 | 65.5468 |  |  | <b>1</b> |
|----|--|--|--|--|----------|----------|---------|----------|---------|--|--|----------|

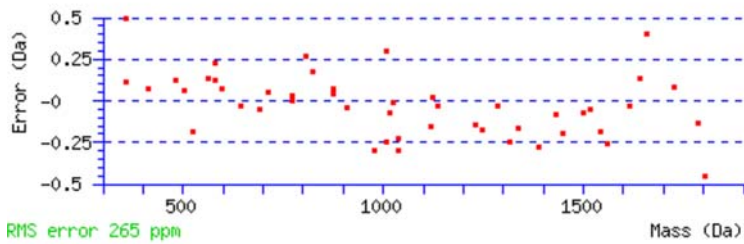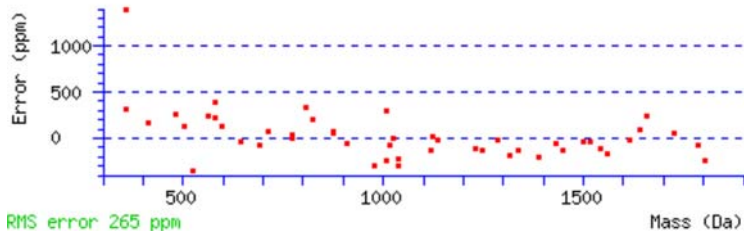

NCBI **BLAST** search of [SLLTEVETYVLSIIPSGPLK](#)  
 (Parameters: blastp, nr protein database, expect=20000, no filter, PAM30)  
 Other BLAST [web gateways](#)

**All matches to this query**

| Score | Mr(calc): | Delta   | Sequence                              |
|-------|-----------|---------|---------------------------------------|
| 47.4  | 2158.2137 | 0.0001  | <a href="#">SLLTEVETYVLSIIPSGPLK</a>  |
| 9.4   | 2158.1971 | 0.0167  | <a href="#">QGVVVRGSRPPVSRALPQPEK</a> |
| 6.9   | 2158.2435 | -0.0298 | <a href="#">QVITIILLLLCKASDFR</a>     |
| 5.8   | 2157.2131 | 1.0007  | <a href="#">QGVVVRGSRPPVSRALPQPEK</a> |
| 5.3   | 2158.1972 | 0.0165  | <a href="#">WRVRLAII EYMPLLAGQL</a>   |
| 5.3   | 2158.2150 | -0.0013 | <a href="#">GPLVFLEQALIQYALQSLR</a>   |
| 5.2   | 2158.2126 | 0.0011  | <a href="#">IAQGISGLVRPLLSGLK VSK</a> |
| 4.3   | 2157.1762 | 1.0375  | <a href="#">VRTELKPMMQVPARLLSR</a>    |
| 1.2   | 2157.1727 | 1.0410  | <a href="#">KKEVLIAGLKP SLAVYLR</a>   |
| 1.1   | 2157.2132 | 1.0005  | <a href="#">WRVRLAII EYMPLLAGQL</a>   |

**Mascot:** <http://www.matrixscience.com/>

**MATRIX SCIENCE Mascot Search Results**

**Peptide View**

MS/MS Fragmentation of **SLLTEVETYVLSIIPSGPLK**

Found in **M1**, NYMC X-187

Match to Query 3594: 2200.232762 from(1101.123657,2+) intensity(57296452.0000)

Title: B120210\_013.07475.07475.2

Data file B120210\_013.mgf.mascot

Click mouse within plot area to zoom in by factor of two about that point

Or, Plot from  to  Da

Label all possible matches  Label matches used for scoring

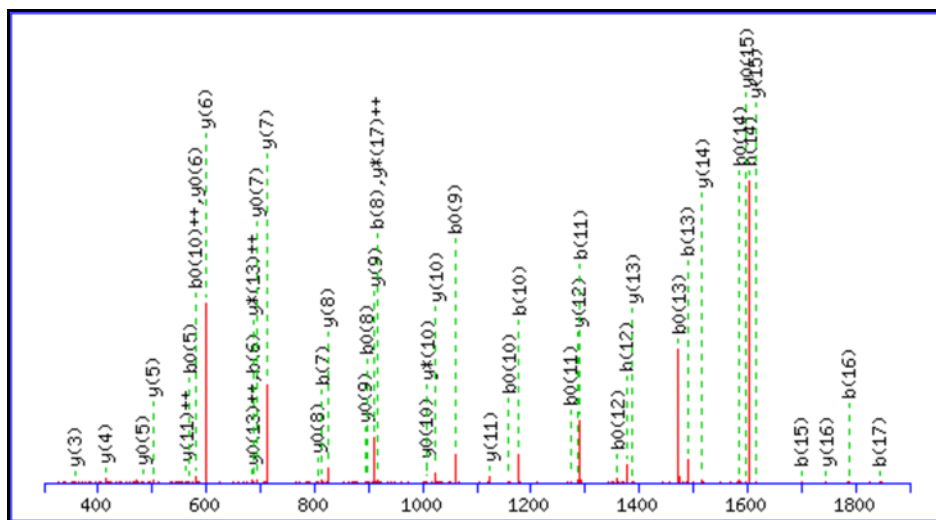

Monoisotopic mass of neutral peptide **Mr(calc): 2200.2242**

**Fixed modifications:** Carbamidomethyl (C) (apply to specified residues or termini only)

**Variable modifications:**

**N-term :** Acetyl (Protein N-term)

**Ions Score:** 90 **Expect:** 4.3e-08

**Matches :** 46/182 fragment ions using 75 most intense peaks ([help](#))

| #  | b         | b <sup>++</sup> | b <sup>0</sup> | b <sup>0++</sup> | Seq. | y         | y <sup>++</sup> | y <sup>*</sup> | y <sup>*++</sup> | y <sup>0</sup> | y <sup>0++</sup> | #  |
|----|-----------|-----------------|----------------|------------------|------|-----------|-----------------|----------------|------------------|----------------|------------------|----|
| 1  | 130.0499  | 65.5286         | 112.0393       | 56.5233          | S    |           |                 |                |                  |                |                  | 20 |
| 2  | 243.1339  | 122.0706        | 225.1234       | 113.0653         | L    | 2072.1889 | 1036.5981       | 2055.1624      | 1028.0848        | 2054.1784      | 1027.5928        | 19 |
| 3  | 356.2180  | 178.6126        | 338.2074       | 169.6074         | L    | 1959.1049 | 980.0561        | 1942.0783      | 971.5428         | 1941.0943      | 971.0508         | 18 |
| 4  | 457.2657  | 229.1365        | 439.2551       | 220.1312         | T    | 1846.0208 | 923.5140        | 1828.9943      | 915.0008         | 1828.0102      | 914.5088         | 17 |
| 5  | 586.3083  | 293.6578        | 568.2977       | 284.6525         | E    | 1744.9731 | 872.9902        | 1727.9466      | 864.4769         | 1726.9626      | 863.9849         | 16 |
| 6  | 685.3767  | 343.1920        | 667.3661       | 334.1867         | V    | 1615.9305 | 808.4689        | 1598.9040      | 799.9556         | 1597.9200      | 799.4636         | 15 |
| 7  | 814.4193  | 407.7133        | 796.4087       | 398.7080         | E    | 1516.8621 | 758.9347        | 1499.8356      | 750.4214         | 1498.8516      | 749.9294         | 14 |
| 8  | 915.4670  | 458.2371        | 897.4564       | 449.2318         | T    | 1387.8195 | 694.4134        | 1370.7930      | 685.9001         | 1369.8090      | 685.4081         | 13 |
| 9  | 1078.5303 | 539.7688        | 1060.5197      | 530.7635         | Y    | 1286.7719 | 643.8896        | 1269.7453      | 635.3763         | 1268.7613      | 634.8843         | 12 |
| 10 | 1177.5987 | 589.3030        | 1159.5881      | 580.2977         | V    | 1123.7085 | 562.3579        | 1106.6820      | 553.8446         | 1105.6980      | 553.3526         | 11 |
| 11 | 1290.6828 | 645.8450        | 1272.6722      | 636.8397         | L    | 1024.6401 | 512.8237        | 1007.6136      | 504.3104         | 1006.6295      | 503.8184         | 10 |
| 12 | 1377.7148 | 689.3610        | 1359.7042      | 680.3558         | S    | 911.5560  | 456.2817        | 894.5295       | 447.7684         | 893.5455       | 447.2764         | 9  |
| 13 | 1490.7989 | 745.9031        | 1472.7883      | 736.8978         | I    | 824.5240  | 412.7656        | 807.4975       | 404.2524         | 806.5135       | 403.7604         | 8  |
| 14 | 1603.8829 | 802.4451        | 1585.8724      | 793.4398         | I    | 711.4400  | 356.2236        | 694.4134       | 347.7103         | 693.4294       | 347.2183         | 7  |
| 15 | 1700.9357 | 850.9715        | 1682.9251      | 841.9662         | P    | 598.3559  | 299.6816        | 581.3293       | 291.1683         | 580.3453       | 290.6763         | 6  |
| 16 | 1787.9677 | 894.4875        | 1769.9571      | 885.4822         | S    | 501.3031  | 251.1552        | 484.2766       | 242.6419         | 483.2926       | 242.1499         | 5  |
| 17 | 1844.9892 | 922.9982        | 1826.9786      | 913.9929         | G    | 414.2711  | 207.6392        | 397.2445       | 199.1259         |                |                  | 4  |
| 18 | 1942.0419 | 971.5246        | 1924.0314      | 962.5193         | P    | 357.2496  | 179.1285        | 340.2231       | 170.6152         |                |                  | 3  |

|    |           |           |           |           |   |          |          |          |          |  |  |   |
|----|-----------|-----------|-----------|-----------|---|----------|----------|----------|----------|--|--|---|
| 19 | 2055.1260 | 1028.0666 | 2037.1154 | 1019.0614 | L | 260.1969 | 130.6021 | 243.1703 | 122.0888 |  |  | 2 |
| 20 |           |           |           |           | K | 147.1128 | 74.0600  | 130.0863 | 65.5468  |  |  | 1 |

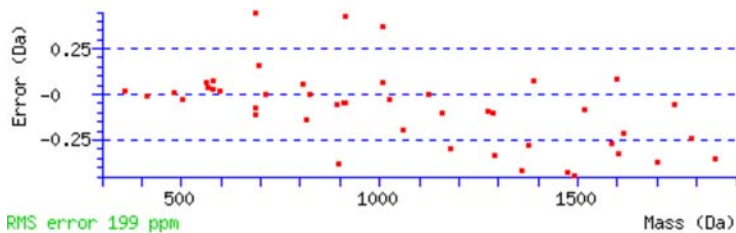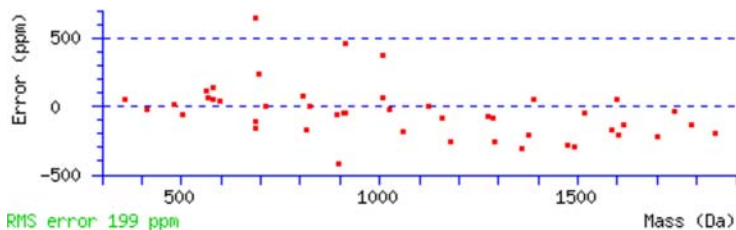

NCBI **BLAST** search of [SLLTEVETYVLSIIPSGPLK](#)  
 (Parameters: blastp, nr protein database, expect=20000, no filter, PAM30)  
 Other BLAST [web gateways](#)

**All matches to this query**

| Score | Mr(calc): | Delta   | Sequence                              |
|-------|-----------|---------|---------------------------------------|
| 90.3  | 2200.2242 | 0.0085  | <a href="#">SLLTEVETYVLSIIPSGPLK</a>  |
| 11.0  | 2199.1899 | 1.0429  | <a href="#">AAAGAVRLLVVQPQPEEQPPK</a> |
| 11.0  | 2199.1899 | 1.0429  | <a href="#">AAAGAVRLLVVQPQPEEQPPK</a> |
| 9.3   | 2199.1899 | 1.0429  | <a href="#">AAAGAVRLLVVQPQPEEQPPK</a> |
| 5.8   | 2200.2119 | 0.0208  | <a href="#">LLKEPSGADIALLKLNSPIK</a>  |
| 5.3   | 2198.2535 | 1.9793  | <a href="#">IIGEKYQALNSRLLIGRPR</a>   |
| 4.5   | 2199.2099 | 1.0229  | <a href="#">GMAAPGPPQLPWLRLGPRLR</a>  |
| 4.0   | 2200.2705 | -0.0377 | <a href="#">VLPALRIRPHGAPQPPTQPR</a>  |
| 3.5   | 2200.2467 | -0.0139 | <a href="#">GLDELALIYLATIQAVALGTR</a> |
| 2.5   | 2198.1976 | 2.0351  | <a href="#">YTRPTPVQKHAIPIKEK</a>     |

**Mascot:** <http://www.matrixscience.com/>

# MASCOT SCIENCE Mascot Search Results

## Peptide View

MS/MS Fragmentation of **SLLTEVETYVLSIIPSGPLKAEIAQR**

Found in **MI**, NYMC X-187

Match to Query 5103: 2868.596154 from(957.205994,3+) intensity(1350380.0000)

Title: B111206\_009.07592.07592.3

Data file B111206\_009.mgf.mascot

Click mouse within plot area to zoom in by factor of two about that point

Or, Plot from  to  Da

Label all possible matches  Label matches used for scoring

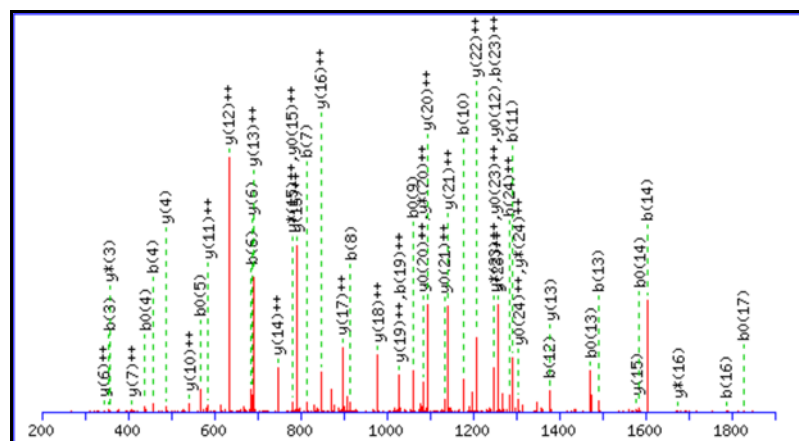

Monoisotopic mass of neutral peptide Mr(calc): 2868.5848

Fixed modifications: Carbamidomethyl (C) (apply to specified residues or termini only)

Variable modifications:

N-term : Acetyl (Protein N-term)

Ions Score: 116 Expect: 8.1e-11

Matches : 52/254 fragment ions using 64 most intense peaks ([help](#))

| #  | b                | b <sup>++</sup>  | b <sup>*</sup> | b <sup>*++</sup> | b <sup>0</sup>   | b <sup>0++</sup> | Seq. | y                | y <sup>++</sup>  | y <sup>*</sup>   | y <sup>*++</sup> | y <sup>0</sup>   | y <sup>0++</sup> | #  |
|----|------------------|------------------|----------------|------------------|------------------|------------------|------|------------------|------------------|------------------|------------------|------------------|------------------|----|
| 1  | 130.0499         | 65.5286          |                |                  | 112.0393         | 56.5233          | S    |                  |                  |                  |                  |                  |                  | 26 |
| 2  | 243.1339         | 122.0706         |                |                  | 225.1234         | 113.0653         | L    | 2740.5495        | 1370.7784        | 2723.5230        | 1362.2651        | 2722.5389        | 1361.7731        | 25 |
| 3  | <b>356.2180</b>  | 178.6126         |                |                  | 338.2074         | 169.6074         | L    | 2627.4654        | 1314.2364        | 2610.4389        | <b>1305.7231</b> | 2609.4549        | <b>1305.2311</b> | 24 |
| 4  | <b>457.2657</b>  | 229.1365         |                |                  | <b>439.2551</b>  | 220.1312         | T    | 2514.3814        | <b>1257.6943</b> | 2497.3548        | <b>1249.1811</b> | 2496.3708        | <b>1248.6890</b> | 23 |
| 5  | 586.3083         | 293.6578         |                |                  | <b>568.2977</b>  | 284.6525         | E    | 2413.3337        | <b>1207.1705</b> | 2396.3072        | 1198.6572        | 2395.3231        | 1198.1652        | 22 |
| 6  | <b>685.3767</b>  | 343.1920         |                |                  | 667.3661         | 334.1867         | V    | 2284.2911        | <b>1142.6492</b> | 2267.2646        | 1134.1359        | 2266.2805        | <b>1133.6439</b> | 21 |
| 7  | <b>814.4193</b>  | 407.7133         |                |                  | 796.4087         | 398.7080         | E    | 2185.2227        | <b>1093.1150</b> | 2168.1961        | <b>1084.6017</b> | 2167.2121        | <b>1084.1097</b> | 20 |
| 8  | <b>915.4670</b>  | 458.2371         |                |                  | 897.4564         | 449.2318         | T    | 2056.1801        | <b>1028.5937</b> | 2039.1536        | 1020.0804        | 2038.1695        | 1019.5884        | 19 |
| 9  | 1078.5303        | 539.7688         |                |                  | <b>1060.5197</b> | 530.7635         | Y    | 1955.1324        | <b>978.0699</b>  | 1938.1059        | 969.5566         | 1937.1219        | 969.0646         | 18 |
| 10 | <b>1177.5987</b> | 589.3030         |                |                  | 1159.5881        | 580.2977         | V    | 1792.0691        | <b>896.5382</b>  | 1775.0425        | 888.0249         | 1774.0585        | 887.5329         | 17 |
| 11 | <b>1290.6828</b> | 645.8450         |                |                  | 1272.6722        | 636.8397         | L    | 1693.0007        | <b>847.0040</b>  | <b>1675.9741</b> | 838.4907         | 1674.9901        | 837.9987         | 16 |
| 12 | <b>1377.7148</b> | 689.3610         |                |                  | 1359.7042        | 680.3558         | S    | <b>1579.9166</b> | <b>790.4619</b>  | 1562.8901        | <b>781.9487</b>  | 1561.9061        | <b>781.4567</b>  | 15 |
| 13 | <b>1490.7989</b> | 745.9031         |                |                  | <b>1472.7883</b> | 736.8978         | I    | 1492.8846        | <b>746.9459</b>  | 1475.8580        | 738.4327         | 1474.8740        | 737.9407         | 14 |
| 14 | <b>1603.8829</b> | 802.4451         |                |                  | <b>1585.8724</b> | 793.4398         | I    | <b>1379.8005</b> | <b>690.4039</b>  | 1362.7740        | 681.8906         | 1361.7900        | 681.3986         | 13 |
| 15 | 1700.9357        | 850.9715         |                |                  | 1682.9251        | 841.9662         | P    | 1266.7165        | <b>633.8619</b>  | 1249.6899        | 625.3486         | <b>1248.7059</b> | 624.8566         | 12 |
| 16 | <b>1787.9677</b> | 894.4875         |                |                  | 1769.9571        | 885.4822         | S    | 1169.6637        | <b>585.3355</b>  | 1152.6371        | 576.8222         | 1151.6531        | 576.3302         | 11 |
| 17 | 1844.9892        | 922.9982         |                |                  | <b>1826.9786</b> | 913.9929         | G    | 1082.6317        | <b>541.8195</b>  | 1065.6051        | 533.3062         | 1064.6211        | 532.8142         | 10 |
| 18 | 1942.0419        | 971.5246         |                |                  | 1924.0314        | 962.5193         | P    | 1025.6102        | 513.3087         | 1008.5837        | 504.7955         | 1007.5996        | 504.3035         | 9  |
| 19 | 2055.1260        | <b>1028.0666</b> |                |                  | 2037.1154        | 1019.0614        | L    | 928.5574         | 464.7824         | 911.5309         | 456.2691         | 910.5469         | 455.7771         | 8  |
| 20 | 2183.2210        | 1092.1141        | 2166.1944      | 1083.6008        | 2165.2104        | 1083.1088        | K    | 815.4734         | <b>408.2403</b>  | 798.4468         | 399.7271         | 797.4628         | 399.2350         | 7  |
| 21 | 2254.2581        | 1127.6327        | 2237.2315      | 1119.1194        | 2236.2475        | 1118.6274        | A    | <b>687.3784</b>  | <b>344.1928</b>  | 670.3519         | 335.6796         | 669.3679         | 335.1876         | 6  |
| 22 | 2383.3007        | 1192.1540        | 2366.2741      | 1183.6407        | 2365.2901        | 1183.1487        | E    | 616.3413         | 308.6743         | 599.3148         | 300.1610         | 598.3307         | 299.6690         | 5  |
| 23 | 2496.3847        | <b>1248.6960</b> | 2479.3582      | 1240.1827        | 2478.3742        | 1239.6907        | I    | <b>487.2987</b>  | 244.1530         | 470.2722         | 235.6397         |                  |                  | 4  |
| 24 | 2567.4219        | <b>1284.2146</b> | 2550.3953      | 1275.7013        | 2549.4113        | 1275.2093        | A    | 374.2146         | 187.6110         | <b>357.1881</b>  | 179.0977         |                  |                  | 3  |
| 25 | 2695.4804        | 1348.2439        | 2678.4539      | 1339.7306        | 2677.4699        | 1339.2386        | Q    | 303.1775         | 152.0924         | 286.1510         | 143.5791         |                  |                  | 2  |
| 26 |                  |                  |                |                  |                  |                  | R    | 175.1190         | 88.0631          | 158.0924         | 79.5498          |                  |                  | 1  |

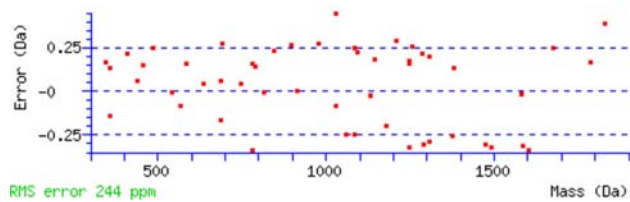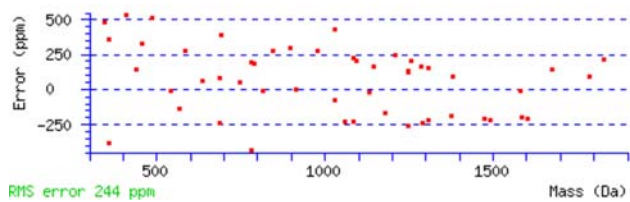

NCBI BLAST search of [SLLTEVETYVLSIIPSGPLKAEIAQR](#)

(Parameters: blastp, nr protein database, expect=20000, no filter, PAM30)

Other BLAST [web gateways](#)

All matches to this query

| Score | Mr(calc): | Delta  | Sequence                                       |
|-------|-----------|--------|------------------------------------------------|
| 115.8 | 2868.5848 | 0.0114 | <a href="#">SLLTEVETYVLSIIPSGPLKAEIAQR</a>     |
| 7.7   | 2866.6006 | 1.9955 | <a href="#">MVHTTSPLLLLLLLSLALVAPLSAR</a>      |
| 7.7   | 2866.6006 | 1.9955 | <a href="#">MVHTTSPLLLLLLLSLALVAPLSAR</a>      |
| 7.0   | 2867.6054 | 0.9908 | <a href="#">VHATSPLLLLLLLSLALVAPLSARK</a>      |
| 7.0   | 2867.6054 | 0.9908 | <a href="#">VHATSPLLLLLLLSLALVAPLSARK</a>      |
| 4.7   | 2868.5722 | 0.0240 | <a href="#">WGPGSHLA AVRSA AELRL LAELLNAXR</a> |
| 2.5   | 2867.6345 | 0.9617 | <a href="#">KQAKENKPLIPQPILGLTASPGVGGAR</a>    |
| 2.0   | 2866.5569 | 2.0393 | <a href="#">LVAVAQSGPLRVE SLNTVKDLPLPR</a>     |
| 2.0   | 2866.5569 | 2.0393 | <a href="#">LVAVAQSGPLRVE SLNTVKDLPLPR</a>     |
| 1.9   | 2868.5484 | 0.0478 | <a href="#">RELLGTYIKQGTEIVPVGEALLENPK</a>     |

Mascot: <http://www.matrixscience.com/>



# MASCOT SCIENCE Mascot Search Results

## Peptide View

MS/MS Fragmentation of **SLLTEVETYVLSIIPSGPLKAEIAQRLEDVFAGK**  
 Found in **MI**, NYMC X-187

Match to Query 5011: 3728.034081 from(1243.685303,3+) intensity(13999260.0000)  
 Title: B120210\_013.07469.07469.3  
 Data file B120210\_013.mgf.mascot

Click mouse within plot area to zoom in by factor of two about that point

Or, Plot from  to  Da

Label all possible matches  Label matches used for scoring

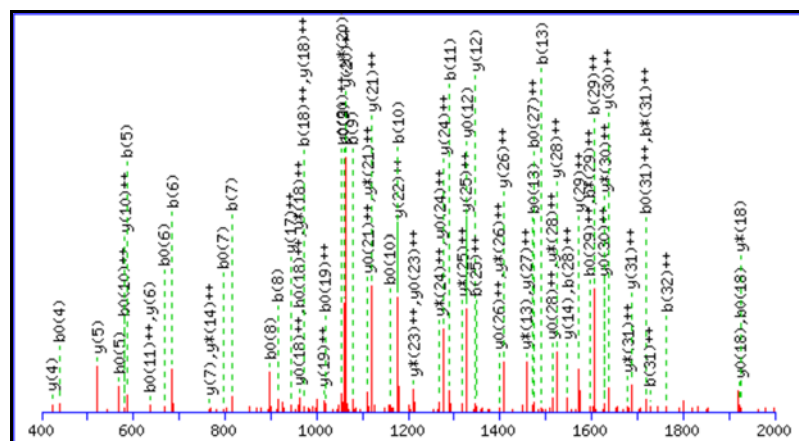

Monoisotopic mass of neutral peptide Mr(calc): 3728.0287  
 Fixed modifications: Carbamidomethyl (C) (apply to specified residues or termini only)  
 Variable modifications:  
 N-term : Acetyl (Protein N-term)  
 Ions Score: 51 Expect: 2.8e-05  
 Matches : 76/348 fragment ions using 137 most intense peaks ([help](#))

| #  | b         | b <sup>++</sup> | b <sup>*</sup> | b <sup>*++</sup> | b <sup>0</sup> | b <sup>0++</sup> | Seq. | y         | y <sup>++</sup> | y <sup>*</sup> | y <sup>*++</sup> | y <sup>0</sup> | y <sup>0++</sup> | #  |
|----|-----------|-----------------|----------------|------------------|----------------|------------------|------|-----------|-----------------|----------------|------------------|----------------|------------------|----|
| 1  | 130.0499  | 65.5286         |                |                  | 112.0393       | 56.5233          | S    |           |                 |                |                  |                |                  | 34 |
| 2  | 243.1339  | 122.0706        |                |                  | 225.1234       | 113.0653         | L    | 3599.9935 | 1800.5004       | 3582.9669      | 1791.9871        | 3581.9829      | 1791.4951        | 33 |
| 3  | 356.2180  | 178.6126        |                |                  | 338.2074       | 169.6074         | L    | 3486.9094 | 1743.9583       | 3469.8829      | 1735.4451        | 3468.8989      | 1734.9531        | 32 |
| 4  | 457.2657  | 229.1365        |                |                  | 439.2551       | 220.1312         | T    | 3373.8254 | 1687.4163       | 3356.7988      | 1678.9030        | 3355.8148      | 1678.4110        | 31 |
| 5  | 586.3083  | 293.6578        |                |                  | 568.2977       | 284.6525         | E    | 3272.7777 | 1636.8925       | 3255.7511      | 1628.3792        | 3254.7671      | 1627.8872        | 30 |
| 6  | 685.3767  | 343.1920        |                |                  | 667.3661       | 334.1867         | V    | 3143.7351 | 1572.3712       | 3126.7085      | 1563.8579        | 3125.7245      | 1563.3659        | 29 |
| 7  | 814.4193  | 407.7133        |                |                  | 796.4087       | 398.7080         | E    | 3044.6667 | 1522.8370       | 3027.6401      | 1514.3237        | 3026.6561      | 1513.8317        | 28 |
| 8  | 915.4670  | 458.2371        |                |                  | 897.4564       | 449.2318         | T    | 2915.6241 | 1458.3157       | 2898.5975      | 1449.8024        | 2897.6135      | 1449.3104        | 27 |
| 9  | 1078.5303 | 539.7688        |                |                  | 1060.5197      | 530.7635         | Y    | 2814.5764 | 1407.7918       | 2797.5498      | 1399.2786        | 2796.5658      | 1398.7866        | 26 |
| 10 | 1177.5987 | 589.3030        |                |                  | 1159.5881      | 580.2977         | V    | 2651.5131 | 1326.2602       | 2634.4865      | 1317.7469        | 2633.5025      | 1317.2549        | 25 |
| 11 | 1290.6828 | 645.8450        |                |                  | 1272.6722      | 636.8397         | L    | 2552.4447 | 1276.7260       | 2535.4181      | 1268.2127        | 2534.4341      | 1267.7207        | 24 |
| 12 | 1377.7148 | 689.3610        |                |                  | 1359.7042      | 680.3558         | S    | 2439.3606 | 1220.1839       | 2422.3340      | 1211.6707        | 2421.3500      | 1211.1786        | 23 |
| 13 | 1490.7989 | 745.9031        |                |                  | 1472.7883      | 736.8978         | I    | 2352.3286 | 1176.6679       | 2335.3020      | 1168.1546        | 2334.3180      | 1167.6626        | 22 |
| 14 | 1603.8829 | 802.4451        |                |                  | 1585.8724      | 793.4398         | I    | 2239.2445 | 1120.1259       | 2222.2179      | 1111.6126        | 2221.2339      | 1111.1206        | 21 |
| 15 | 1700.9357 | 850.9715        |                |                  | 1682.9251      | 841.9662         | P    | 2126.1604 | 1063.5839       | 2109.1339      | 1055.0706        | 2108.1499      | 1054.5786        | 20 |
| 16 | 1787.9677 | 894.4875        |                |                  | 1769.9571      | 885.4822         | S    | 2029.1077 | 1015.0575       | 2012.0811      | 1006.5442        | 2011.0971      | 1006.0522        | 19 |
| 17 | 1844.9892 | 922.9982        |                |                  | 1826.9786      | 913.9929         | G    | 1942.0756 | 971.5415        | 1925.0491      | 963.0282         | 1924.0651      | 962.5362         | 18 |
| 18 | 1942.0419 | 971.5246        |                |                  | 1924.0314      | 962.5193         | P    | 1885.0542 | 943.0307        | 1868.0276      | 934.5175         | 1867.0436      | 934.0254         | 17 |
| 19 | 2055.1260 | 1028.0666       |                |                  | 2037.1154      | 1019.0614        | L    | 1788.0014 | 894.5043        | 1770.9749      | 885.9911         | 1769.9908      | 885.4991         | 16 |
| 20 | 2183.2210 | 1092.1141       | 2166.1944      | 1083.6008        | 2165.2104      | 1083.1088        | K    | 1674.9173 | 837.9623        | 1657.8908      | 829.4490         | 1656.9068      | 828.9570         | 15 |
| 21 | 2254.2581 | 1127.6327       | 2237.2315      | 1119.1194        | 2236.2475      | 1118.6274        | A    | 1546.8224 | 773.9148        | 1529.7958      | 765.4016         | 1528.8118      | 764.9095         | 14 |
| 22 | 2383.3007 | 1192.1540       | 2366.2741      | 1183.6407        | 2365.2901      | 1183.1487        | E    | 1475.7853 | 738.3963        | 1458.7587      | 729.8830         | 1457.7747      | 729.3910         | 13 |
| 23 | 2496.3847 | 1248.6960       | 2479.3582      | 1240.1827        | 2478.3742      | 1239.6907        | I    | 1346.7427 | 673.8750        | 1329.7161      | 665.3617         | 1328.7321      | 664.8697         | 12 |
| 24 | 2567.4219 | 1284.2146       | 2550.3953      | 1275.7013        | 2549.4113      | 1275.2093        | A    | 1233.6586 | 617.3329        | 1216.6321      | 608.8197         | 1215.6480      | 608.3277         | 11 |
| 25 | 2695.4804 | 1348.2439       | 2678.4539      | 1339.7306        | 2677.4699      | 1339.2386        | Q    | 1162.6215 | 581.8144        | 1145.5950      | 573.3011         | 1144.6109      | 572.8091         | 10 |
| 26 | 2851.5815 | 1426.2944       | 2834.5550      | 1417.7811        | 2833.5710      | 1417.2891        | R    | 1034.5629 | 517.7851        | 1017.5364      | 509.2718         | 1016.5524      | 508.7798         | 9  |
| 27 | 2964.6656 | 1482.8364       | 2947.6391      | 1474.3232        | 2946.6550      | 1473.8312        | L    | 878.4618  | 439.7345        | 861.4353       | 431.2213         | 860.4512       | 430.7293         | 8  |

|    |           |                  |           |                  |           |                  |   |                 |          |          |          |          |          |   |
|----|-----------|------------------|-----------|------------------|-----------|------------------|---|-----------------|----------|----------|----------|----------|----------|---|
| 28 | 3093.7082 | <b>1547.3577</b> | 3076.6816 | 1538.8445        | 3075.6976 | 1538.3525        | E | <b>765.3777</b> | 383.1925 | 748.3512 | 374.6792 | 747.3672 | 374.1872 | 7 |
| 29 | 3208.7351 | <b>1604.8712</b> | 3191.7086 | <b>1596.3579</b> | 3190.7246 | <b>1595.8659</b> | D | <b>636.3352</b> | 318.6712 | 619.3086 | 310.1579 | 618.3246 | 309.6659 | 6 |
| 30 | 3307.8036 | 1654.4054        | 3290.7770 | 1645.8921        | 3289.7930 | 1645.4001        | V | <b>521.3082</b> | 261.1577 | 504.2817 | 252.6445 |          |          | 5 |
| 31 | 3454.8720 | <b>1727.9396</b> | 3437.8454 | <b>1719.4263</b> | 3436.8614 | <b>1718.9343</b> | F | <b>422.2398</b> | 211.6235 | 405.2132 | 203.1103 |          |          | 4 |
| 32 | 3525.9091 | <b>1763.4582</b> | 3508.8825 | 1754.9449        | 3507.8985 | 1754.4529        | A | 275.1714        | 138.0893 | 258.1448 | 129.5761 |          |          | 3 |
| 33 | 3582.9305 | 1791.9689        | 3565.9040 | 1783.4556        | 3564.9200 | 1782.9636        | G | 204.1343        | 102.5708 | 187.1077 | 94.0575  |          |          | 2 |
| 34 |           |                  |           |                  |           |                  | K | 147.1128        | 74.0600  | 130.0863 | 65.5468  |          |          | 1 |

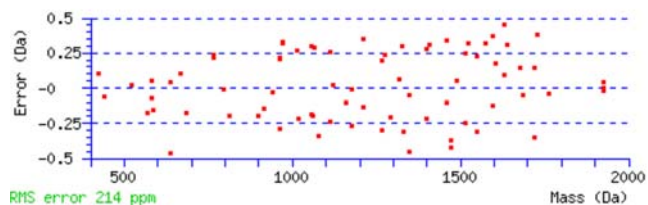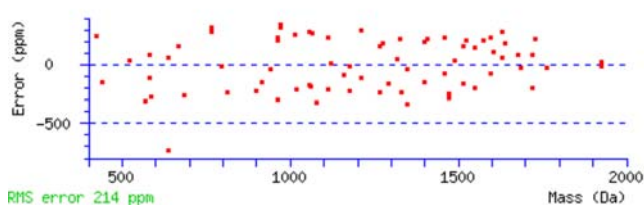

NCBI BLAST search of [SLLTEVETYVLSIIPSGPLKAEIAQRLEDVFAGK](#)

(Parameters: blastp, nr protein database, expect=20000, no filter, PAM30)

Other BLAST [web gateways](#)

All matches to this query

| Score | Mr(calc): | Delta  | Sequence                                           |
|-------|-----------|--------|----------------------------------------------------|
| 50.8  | 3728.0287 | 0.0053 | <a href="#">SLLTEVETYVLSIIPSGPLKAEIAQRLEDVFAGK</a> |
| 2.0   | 3726.0597 | 1.9744 | <a href="#">HPPATVDSNGYMMSPSGSYSPDSGSAGYGK</a>     |
| 2.0   | 3726.0597 | 1.9744 | <a href="#">HPPATVDSNGYMMSPSGSYSPDSGSAGYGK</a>     |
| 0.9   | 3727.0164 | 1.0177 | <a href="#">EMVYDCTSSSFDGIAMMSPEDSWVSK</a>         |
| 0.4   | 3726.0740 | 1.9601 | <a href="#">STNGKNPTCIVSHATLNETRSINCSSR</a>        |
| 0.2   | 3728.0215 | 0.0126 | <a href="#">NSMTPNPGYQPSMNTSDMMGRMSYEPNK</a>       |
| 0.0   | 3728.0215 | 0.0126 | <a href="#">NSMTPNPGYQPSMNTSDMMGRMSYEPNK</a>       |

Mascot: <http://www.matrixscience.com/>

# MASCOT SCIENCE Mascot Search Results

## Peptide View

MS/MS Fragmentation of **SLLTEVETPIR**

Found in **M2**, NYMC X-187

Match to Query 1376: 1298.708836 from(650.361694,2+) intensity(2242170.0000)

Title: B111206\_009.04601.04601.2

Data file B111206\_009.mgf.mascot

Click mouse within plot area to zoom in by factor of two about that point

Or, Plot from  to  Da

Label all possible matches  Label matches used for scoring

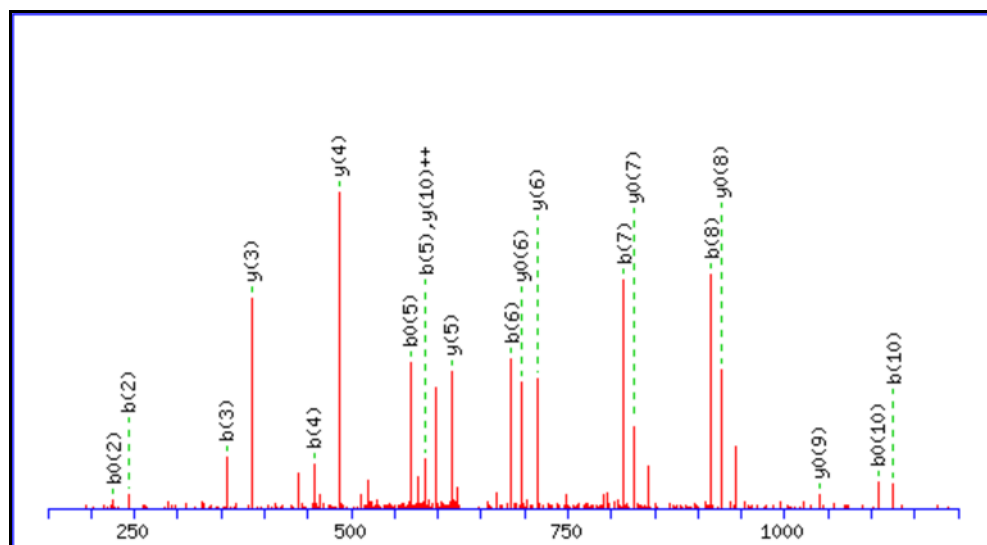

Monoisotopic mass of neutral peptide **Mr(calc)**: 1298.7082

**Fixed modifications**: Carbamidomethyl (C) (apply to specified residues or termini only)

**Variable modifications**:

**N-term** : Acetyl (Protein N-term)

**Ions Score**: 84 **Expect**: 1.8e-07

**Matches** : 20/94 fragment ions using 20 most intense peaks ([help](#))

| #  | b                | b <sup>++</sup> | b <sup>0</sup>   | b <sup>0++</sup> | Seq. | y               | y <sup>++</sup> | y*        | y <sup>*++</sup> | y <sup>0</sup>   | y <sup>0++</sup> | #  |
|----|------------------|-----------------|------------------|------------------|------|-----------------|-----------------|-----------|------------------|------------------|------------------|----|
| 1  | 130.0499         | 65.5286         | 112.0393         | 56.5233          | S    |                 |                 |           |                  |                  |                  | 11 |
| 2  | <b>243.1339</b>  | 122.0706        | <b>225.1234</b>  | 113.0653         | L    | 1170.6729       | <b>585.8401</b> | 1153.6463 | 577.3268         | 1152.6623        | 576.8348         | 10 |
| 3  | <b>356.2180</b>  | 178.6126        | 338.2074         | 169.6074         | L    | 1057.5888       | 529.2980        | 1040.5623 | 520.7848         | <b>1039.5782</b> | 520.2928         | 9  |
| 4  | <b>457.2657</b>  | 229.1365        | 439.2551         | 220.1312         | T    | 944.5047        | 472.7560        | 927.4782  | 464.2427         | <b>926.4942</b>  | 463.7507         | 8  |
| 5  | <b>586.3083</b>  | 293.6578        | <b>568.2977</b>  | 284.6525         | E    | 843.4571        | 422.2322        | 826.4305  | 413.7189         | <b>825.4465</b>  | 413.2269         | 7  |
| 6  | <b>685.3767</b>  | 343.1920        | 667.3661         | 334.1867         | V    | <b>714.4145</b> | 357.7109        | 697.3879  | 349.1976         | <b>696.4039</b>  | 348.7056         | 6  |
| 7  | <b>814.4193</b>  | 407.7133        | 796.4087         | 398.7080         | E    | <b>615.3461</b> | 308.1767        | 598.3195  | 299.6634         | 597.3355         | 299.1714         | 5  |
| 8  | <b>915.4670</b>  | 458.2371        | 897.4564         | 449.2318         | T    | <b>486.3035</b> | 243.6554        | 469.2769  | 235.1421         | 468.2929         | 234.6501         | 4  |
| 9  | 1012.5197        | 506.7635        | 994.5092         | 497.7582         | P    | <b>385.2558</b> | 193.1315        | 368.2292  | 184.6183         |                  |                  | 3  |
| 10 | <b>1125.6038</b> | 563.3055        | <b>1107.5932</b> | 554.3002         | I    | 288.2030        | 144.6051        | 271.1765  | 136.0919         |                  |                  | 2  |
| 11 |                  |                 |                  |                  | R    | 175.1190        | 88.0631         | 158.0924  | 79.5498          |                  |                  | 1  |

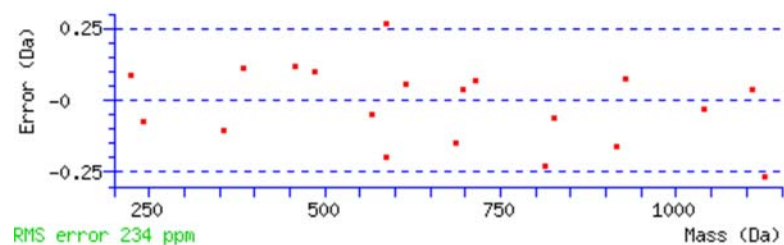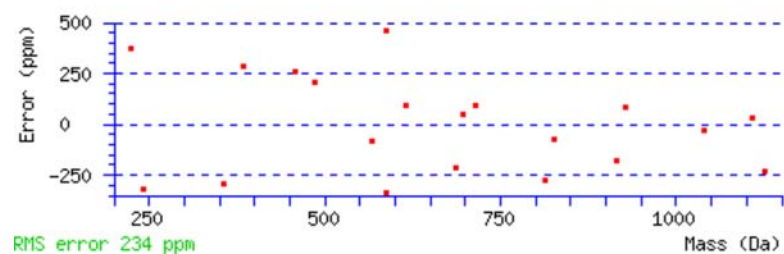

NCBI **BLAST** search of [SLLTEVETPIR](#)

(Parameters: blastp, nr protein database, expect=20000, no filter, PAM30)

Other BLAST [web gateways](#)

#### All matches to this query

| Score | Mr(calc): | Delta   | Sequence                     |
|-------|-----------|---------|------------------------------|
| 83.8  | 1298.7082 | 0.0007  | <a href="#">SLLTEVETPIR</a>  |
| 11.0  | 1297.7241 | 0.9847  | <a href="#">DNAALKVTLPQK</a> |
| 10.8  | 1298.6904 | 0.0184  | <a href="#">MLIQDIPSIPR</a>  |
| 10.1  | 1298.6942 | 0.0146  | <a href="#">IQENVRNAIGGK</a> |
| 8.5   | 1297.6990 | 1.0098  | <a href="#">TGTLTSDHLVVR</a> |
| 8.3   | 1296.6826 | 2.0262  | <a href="#">LEASNWLTHVK</a>  |
| 7.7   | 1297.7047 | 1.0042  | <a href="#">FTQDLLKLLK</a>   |
| 7.5   | 1298.6943 | 0.0146  | <a href="#">VQEEIDRVVGR</a>  |
| 7.0   | 1298.6870 | 0.0218  | <a href="#">ELLTDPYAHLK</a>  |
| 6.8   | 1298.7194 | -0.0105 | <a href="#">SAPQIESKLLGR</a> |

Mascot: <http://www.matrixscience.com/>

# MASCOT SCIENCE Mascot Search Results

## Peptide View

Influenza B/Brisbane/60/2008  
N-terminal peptide spectra

MS/MS Fragmentation of **MDTFITR**

Found in **PA**, B/Brisbane/60/2008

Match to Query 2268: 924.436250 from(463.225401,2+) intensity(7833460.0000)

Title: edflowthruFBV15.22176.22176.2

Data file edflowthruFBV15.mgf.mascot

Click mouse within plot area to zoom in by factor of two about that point

Or, Plot from  to  Da

Label all possible matches  Label matches used for scoring

View spectrum in original style  View spectrum with detailed annotation

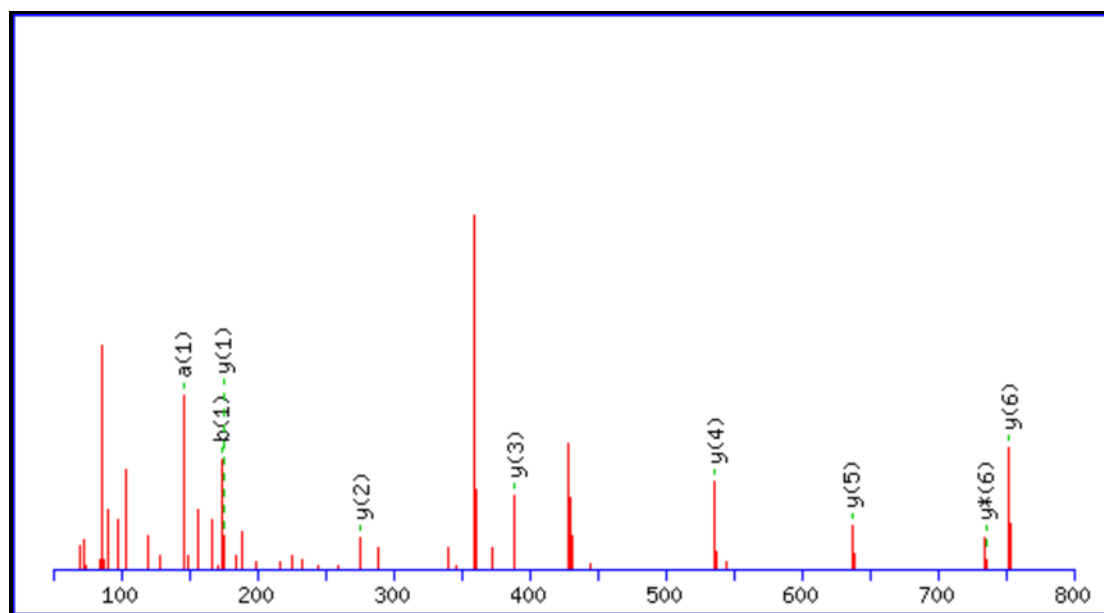

**Monoisotopic mass of neutral peptide Mr(calc):** 924.4375

**Fixed modifications:** Carbamidomethyl (C) (apply to specified residues or termini only)

**Variable modifications:**

**N-term :** Acetyl (Protein N-term)

**Ions Score:** 27 **Expect:** 0.029

**Matches :** 9/48 fragment ions using 26 most intense peaks ([help](#))

| # | a        | a <sup>++</sup> | b        | b <sup>++</sup> | Seq. | y        | y <sup>++</sup> | y*       | y* <sup>++</sup> | # |
|---|----------|-----------------|----------|-----------------|------|----------|-----------------|----------|------------------|---|
| 1 | 146.0634 | 73.5353         | 174.0583 | 87.5328         | M    |          |                 |          |                  | 7 |
| 2 | 261.0904 | 131.0488        | 289.0853 | 145.0463        | D    | 752.3937 | 376.7005        | 735.3672 | 368.1872         | 6 |
| 3 | 362.1380 | 181.5727        | 390.1329 | 195.5701        | T    | 637.3668 | 319.1870        | 620.3402 | 310.6738         | 5 |
| 4 | 509.2064 | 255.1069        | 537.2014 | 269.1043        | F    | 536.3191 | 268.6632        | 519.2926 | 260.1499         | 4 |
| 5 | 622.2905 | 311.6489        | 650.2854 | 325.6464        | I    | 389.2507 | 195.1290        | 372.2241 | 186.6157         | 3 |
| 6 | 723.3382 | 362.1727        | 751.3331 | 376.1702        | T    | 276.1666 | 138.5870        | 259.1401 | 130.0737         | 2 |
| 7 |          |                 |          |                 | R    | 175.1190 | 88.0631         | 158.0924 | 79.5498          | 1 |

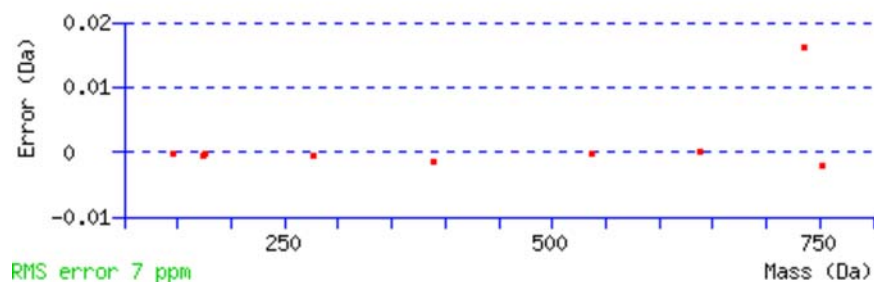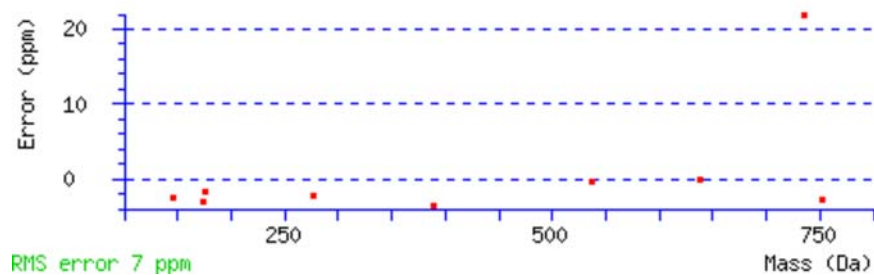

NCBI **BLAST** search of [MDTFITR](#)

(Parameters: blastp, nr protein database, expect=20000, no filter, PAM30)

Other BLAST [web gateways](#)

**All matches to this query**

| Score | Mr(calc): | Delta   | Sequence                  |
|-------|-----------|---------|---------------------------|
| 27.0  | 924.4375  | -0.0013 | <a href="#">MDTFITR</a>   |
| 9.9   | 924.4317  | 0.0045  | <a href="#">LSPVSTK</a>   |
| 9.9   | 924.4317  | 0.0045  | <a href="#">LSPVSTK</a>   |
| 8.2   | 924.4301  | 0.0061  | <a href="#">GSGFGASTK</a> |
| 5.2   | 924.4408  | -0.0046 | <a href="#">LMKMEK</a>    |
| 5.2   | 924.4375  | -0.0012 | <a href="#">LMQFEK</a>    |
| 5.2   | 924.4375  | -0.0012 | <a href="#">LQMFQK</a>    |
| 5.2   | 924.4375  | -0.0012 | <a href="#">LQMFQK</a>    |
| 4.3   | 924.4222  | 0.0140  | <a href="#">STLSMEK</a>   |
| 3.7   | 924.4408  | -0.0046 | <a href="#">LMEMKK</a>    |

**Mascot:** <http://www.matrixscience.com/>

**Mascot Search Results**

**Peptide View**

MS/MS Fragmentation of **SNMDDIDGINTGTIDKTPEEITSGTSGTTRPIIRPATLAPPSNK**  
 Found in **NP**, B/Brisbane/60/2008

Match to Query 11238: 4509.250896 from(1128.320000,4+) intensity(14074529.0000)  
 Title: D120713\_002.13013.13013.4  
 Data file D120713\_002.mgf.mascot

Click mouse within plot area to zoom in by factor of two about that point  
 Or, Plot from  to  Da   
 Label all possible matches  Label matches used for scoring   
 View spectrum in original style  View spectrum with detailed annotation

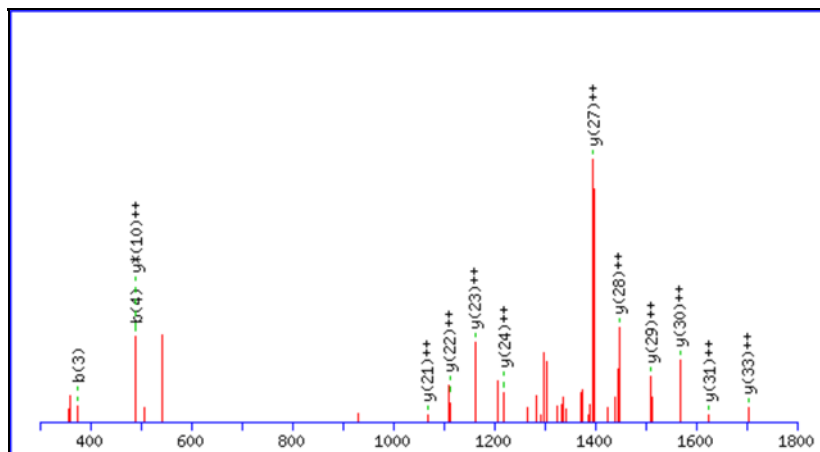

**Monoisotopic mass of neutral peptide Mr(calc):** 4509.2544  
**Fixed modifications:** Carbamidomethyl (C) (apply to specified residues or termini only)  
**Variable modifications:**  
 N-term : Acetyl (N-term)  
 N42 : Deamidated (NQ)  
**Ions Score:** 27 **Expect:** 0.12  
**Matches:** 13/500 fragment ions using 37 most intense peaks ([help](#))

| #  | a         | a <sup>++</sup> | a <sup>*</sup> | a <sup>*++</sup> | b               | b <sup>++</sup> | b <sup>*</sup> | b <sup>*++</sup> | Seq. | y         | y <sup>++</sup>  | y <sup>*</sup> | y <sup>*++</sup> | #  |
|----|-----------|-----------------|----------------|------------------|-----------------|-----------------|----------------|------------------|------|-----------|------------------|----------------|------------------|----|
| 1  | 102.0550  | 51.5311         |                |                  | 130.0499        | 65.5286         |                |                  | S    |           |                  |                |                  | 43 |
| 2  | 216.0979  | 108.5526        | 199.0713       | 100.0393         | 244.0928        | 122.5500        | 227.0662       | 114.0368         | N    | 4381.2192 | 2191.1132        | 4364.1926      | 2182.5999        | 42 |
| 3  | 347.1384  | 174.0728        | 330.1118       | 165.5595         | <b>375.1333</b> | 188.0703        | 358.1067       | 179.5570         | M    | 4267.1762 | 2134.0918        | 4250.1497      | 2125.5785        | 41 |
| 4  | 462.1653  | 231.5863        | 445.1388       | 223.0730         | <b>490.1602</b> | 245.5837        | 473.1337       | 237.0705         | D    | 4136.1357 | 2068.5715        | 4119.1092      | 2060.0582        | 40 |
| 5  | 575.2494  | 288.1283        | 558.2228       | 279.6150         | 603.2443        | 302.1258        | 586.2177       | 293.6125         | I    | 4021.1088 | 2011.0580        | 4004.0822      | 2002.5448        | 39 |
| 6  | 690.2763  | 345.6418        | 673.2498       | 337.1285         | 718.2712        | 359.6393        | 701.2447       | 351.1260         | D    | 3908.0247 | 1954.5160        | 3890.9982      | 1946.0027        | 38 |
| 7  | 747.2978  | 374.1525        | 730.2712       | 365.6393         | 775.2927        | 388.1500        | 758.2661       | 379.6367         | G    | 3792.9978 | 1897.0025        | 3775.9712      | 1888.4893        | 37 |
| 8  | 860.3818  | 430.6946        | 843.3553       | 422.1813         | 888.3768        | 444.6920        | 871.3502       | 436.1787         | I    | 3735.9763 | 1868.4918        | 3718.9498      | 1859.9785        | 36 |
| 9  | 974.4248  | 487.7160        | 957.3982       | 479.2027         | 1002.4197       | 501.7135        | 985.3931       | 493.2002         | N    | 3622.8923 | 1811.9498        | 3605.8657      | 1803.4365        | 35 |
| 10 | 1075.4724 | 538.2399        | 1058.4459      | 529.7266         | 1103.4674       | 552.2373        | 1086.4408      | 543.7240         | T    | 3508.8493 | 1754.9283        | 3491.8228      | 1746.4150        | 34 |
| 11 | 1132.4939 | 566.7506        | 1115.4674      | 558.2373         | 1160.4888       | 580.7481        | 1143.4623      | 572.2348         | G    | 3407.8017 | <b>1704.4045</b> | 3390.7751      | 1695.8912        | 33 |
| 12 | 1233.5416 | 617.2744        | 1216.5150      | 608.7612         | 1261.5365       | 631.2719        | 1244.5100      | 622.7586         | T    | 3350.7802 | 1675.8937        | 3333.7536      | 1667.3805        | 32 |
| 13 | 1346.6257 | 673.8165        | 1329.5991      | 665.3032         | 1374.6206       | 687.8139        | 1357.5940      | 679.3006         | I    | 3249.7325 | <b>1625.3699</b> | 3232.7060      | 1616.8566        | 31 |
| 14 | 1461.6526 | 731.3299        | 1444.6261      | 722.8167         | 1489.6475       | 745.3274        | 1472.6210      | 736.8141         | D    | 3136.6485 | <b>1568.8279</b> | 3119.6219      | 1560.3146        | 30 |
| 15 | 1589.7476 | 795.3774        | 1572.7210      | 786.8641         | 1617.7425       | 809.3749        | 1600.7159      | 800.8616         | K    | 3021.6215 | <b>1511.3144</b> | 3004.5950      | 1502.8011        | 29 |
| 16 | 1690.7952 | 845.9013        | 1673.7687      | 837.3880         | 1718.7902       | 859.8987        | 1701.7636      | 851.3854         | T    | 2893.5265 | <b>1447.2669</b> | 2876.5000      | 1438.7536        | 28 |
| 17 | 1787.8480 | 894.4276        | 1770.8215      | 885.9144         | 1815.8429       | 908.4251        | 1798.8164      | 899.9118         | P    | 2792.4789 | <b>1396.7431</b> | 2775.4523      | 1388.2298        | 27 |
| 18 | 1916.8906 | 958.9489        | 1899.8640      | 950.4357         | 1944.8855       | 972.9464        | 1927.8590      | 964.4331         | E    | 2695.4261 | 1348.2167        | 2678.3996      | 1339.7034        | 26 |
| 19 | 2045.9332 | 1023.4702       | 2028.9066      | 1014.9570        | 2073.9281       | 1037.4677       | 2056.9016      | 1028.9544        | E    | 2566.3835 | 1283.6954        | 2549.3570      | 1275.1821        | 25 |
| 20 | 2159.0173 | 1080.0123       | 2141.9907      | 1071.4990        | 2187.0122       | 1094.0097       | 2169.9856      | 1085.4964        | I    | 2437.3409 | <b>1219.1741</b> | 2420.3144      | 1210.6608        | 24 |



|    |           |           |           |           |           |           |           |           |   |           |           |           |           |    |
|----|-----------|-----------|-----------|-----------|-----------|-----------|-----------|-----------|---|-----------|-----------|-----------|-----------|----|
| 21 | 2260.0649 | 1130.5361 | 2243.0384 | 1122.0228 | 2288.0598 | 1144.5336 | 2271.0333 | 1136.0203 | T | 2324.2569 | 1162.6321 | 2307.2303 | 1154.1188 | 23 |
| 22 | 2347.0970 | 1174.0521 | 2330.0704 | 1165.5388 | 2375.0919 | 1188.0496 | 2358.0653 | 1179.5363 | S | 2223.2092 | 1112.1082 | 2206.1826 | 1103.5949 | 22 |
| 23 | 2404.1184 | 1202.5629 | 2387.0919 | 1194.0496 | 2432.1133 | 1216.5603 | 2415.0868 | 1208.0470 | G | 2136.1771 | 1068.5922 | 2119.1506 | 1060.0789 | 21 |
| 24 | 2505.1661 | 1253.0867 | 2488.1396 | 1244.5734 | 2533.1610 | 1267.0841 | 2516.1345 | 1258.5709 | T | 2079.1557 | 1040.0815 | 2062.1291 | 1031.5682 | 20 |
| 25 | 2592.1981 | 1296.6027 | 2575.1716 | 1288.0894 | 2620.1930 | 1310.6002 | 2603.1665 | 1302.0869 | S | 1978.1080 | 989.5576  | 1961.0815 | 981.0444  | 19 |
| 26 | 2649.2196 | 1325.1134 | 2632.1930 | 1316.6002 | 2677.2145 | 1339.1109 | 2660.1880 | 1330.5976 | G | 1891.0760 | 946.0416  | 1874.0494 | 937.5284  | 18 |
| 27 | 2750.2673 | 1375.6373 | 2733.2407 | 1367.1240 | 2778.2622 | 1389.6347 | 2761.2356 | 1381.1215 | T | 1834.0545 | 917.5309  | 1817.0280 | 909.0176  | 17 |
| 28 | 2851.3150 | 1426.1611 | 2834.2884 | 1417.6478 | 2879.3099 | 1440.1586 | 2862.2833 | 1431.6453 | T | 1733.0068 | 867.0071  | 1715.9803 | 858.4938  | 16 |
| 29 | 3007.4161 | 1504.2117 | 2990.3895 | 1495.6984 | 3035.4110 | 1518.2091 | 3018.3844 | 1509.6959 | R | 1631.9592 | 816.4832  | 1614.9326 | 807.9699  | 15 |
| 30 | 3104.4688 | 1552.7381 | 3087.4423 | 1544.2248 | 3132.4637 | 1566.7355 | 3115.4372 | 1558.2222 | P | 1475.8580 | 738.4327  | 1458.8315 | 729.9194  | 14 |
| 31 | 3217.5529 | 1609.2801 | 3200.5263 | 1600.7668 | 3245.5478 | 1623.2775 | 3228.5213 | 1614.7643 | I | 1378.8053 | 689.9063  | 1361.7787 | 681.3930  | 13 |
| 32 | 3330.6370 | 1665.8221 | 3313.6104 | 1657.3088 | 3358.6319 | 1679.8196 | 3341.6053 | 1671.3063 | I | 1265.7212 | 633.3642  | 1248.6947 | 624.8510  | 12 |
| 33 | 3486.7381 | 1743.8727 | 3469.7115 | 1735.3594 | 3514.7330 | 1757.8701 | 3497.7064 | 1749.3569 | R | 1152.6371 | 576.8222  | 1135.6106 | 568.3089  | 11 |
| 34 | 3583.7908 | 1792.3991 | 3566.7643 | 1783.8858 | 3611.7857 | 1806.3965 | 3594.7592 | 1797.8832 | P | 996.5360  | 498.7717  | 979.5095  | 490.2584  | 10 |
| 35 | 3654.8279 | 1827.9176 | 3637.8014 | 1819.4043 | 3682.8229 | 1841.9151 | 3665.7963 | 1833.4018 | A | 899.4833  | 450.2453  | 882.4567  | 441.7320  | 9  |
| 36 | 3755.8756 | 1878.4415 | 3738.8491 | 1869.9282 | 3783.8705 | 1892.4389 | 3766.8440 | 1883.9256 | T | 828.4462  | 414.7267  | 811.4196  | 406.2134  | 8  |
| 37 | 3868.9597 | 1934.9835 | 3851.9331 | 1926.4702 | 3896.9546 | 1948.9809 | 3879.9281 | 1940.4677 | L | 727.3985  | 364.2029  | 710.3719  | 355.6896  | 7  |
| 38 | 3939.9968 | 1970.5020 | 3922.9703 | 1961.9888 | 3967.9917 | 1984.4995 | 3950.9652 | 1975.9862 | A | 614.3144  | 307.6608  | 597.2879  | 299.1476  | 6  |
| 39 | 4037.0496 | 2019.0284 | 4020.0230 | 2010.5151 | 4065.0445 | 2033.0259 | 4048.0179 | 2024.5126 | P | 543.2773  | 272.1423  | 526.2508  | 263.6290  | 5  |
| 40 | 4134.1023 | 2067.5548 | 4117.0758 | 2059.0415 | 4162.0972 | 2081.5523 | 4145.0707 | 2073.0390 | P | 446.2245  | 223.6159  | 429.1980  | 215.1026  | 4  |
| 41 | 4221.1344 | 2111.0708 | 4204.1078 | 2102.5575 | 4249.1293 | 2125.0683 | 4232.1027 | 2116.5550 | S | 349.1718  | 175.0895  | 332.1452  | 166.5763  | 3  |
| 42 | 4336.1613 | 2168.5843 | 4319.1348 | 2160.0710 | 4364.1562 | 2182.5817 | 4347.1297 | 2174.0685 | N | 262.1397  | 131.5735  | 245.1132  | 123.0602  | 2  |
| 43 |           |           |           |           |           |           |           |           | K | 147.1128  | 74.0600   | 130.0863  | 65.5468   | 1  |

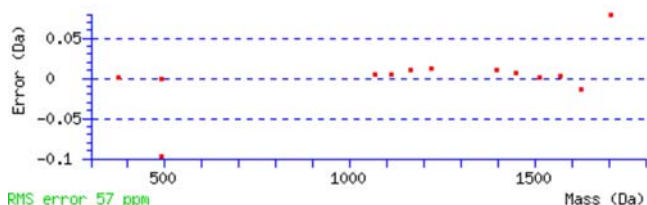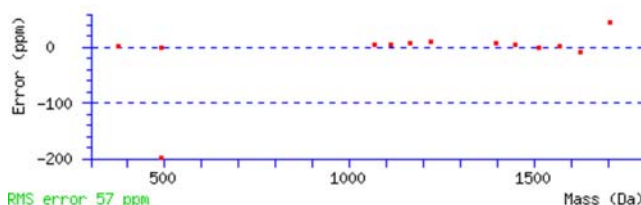

NCBI BLAST search of [SNMIDIDGINTGTIDKTPEEITSGTSGTTRPIIRPATLAPPSNK](#)

(Parameters: blastp, nr protein database, expect=20000, no filter, PAM30)

Other BLAST [web gateways](#)

All matches to this query

| Score | Mr(calc): | Delta   | Sequence                                                     |
|-------|-----------|---------|--------------------------------------------------------------|
| 27.4  | 4509.2544 | -0.0035 | <a href="#">SNMIDIDGINTGTIDKTPEEITSGTSGTTRPIIRPATLAPPSNK</a> |
| 16.7  | 4507.2557 | 1.9952  | <a href="#">TGDPPDVREAKILAESTAMDTNAATVALIISNPNSIFQLILR</a>   |
| 13.0  | 4508.2460 | 1.0049  | <a href="#">MVTDFPYSVVGAVATVTQAIMWSIVIHTRNPDPLMK</a>         |
| 13.0  | 4509.2300 | 0.0209  | <a href="#">MVTDFPYSVVGAVATVTQAIMWSIVIHTRNPDPLMK</a>         |
| 11.2  | 4509.1654 | 0.0855  | <a href="#">TSSELMVKVKNVISAVNAAQLLINNNASLVIVQETK</a>         |
| 11.2  | 4509.1654 | 0.0855  | <a href="#">TSSELMVKVKNVISAVNAAQLLINNNASLVIVQETK</a>         |
| 11.2  | 4509.1654 | 0.0855  | <a href="#">TSSELMVKVKNVISAVNAAQLLINNNASLVIVQETK</a>         |
| 11.2  | 4509.1654 | 0.0855  | <a href="#">TSSELMVKVKNVISAVNAAQLLINNNASLVIVQETK</a>         |
| 10.9  | 4508.2460 | 1.0049  | <a href="#">MVTDFPYSVVGAVATVTQAIMWSIVIHTRNPDPLMK</a>         |
| 10.9  | 4509.2300 | 0.0209  | <a href="#">MVTDFPYSVVGAVATVTQAIMWSIVIHTRNPDPLMK</a>         |

Mascot: <http://www.matrixscience.com/>

# MASCOT SCIENCE Mascot Search Results

## Peptide View

MS/MS Fragmentation of **MSLFGDTIAYLLSLTEDGEGK**

Found in **M1**, B/Brisbane/60/2008

Match to Query 4204: 2275.087010 from(1138.550781,2+) intensity(66205.9000)

Title: B111206\_011.06917.06917.2

Data file B111206\_011.mgf.mascot

Click mouse within plot area to zoom in by factor of two about that point

Or, Plot from  to  Da

Label all possible matches  Label matches used for scoring

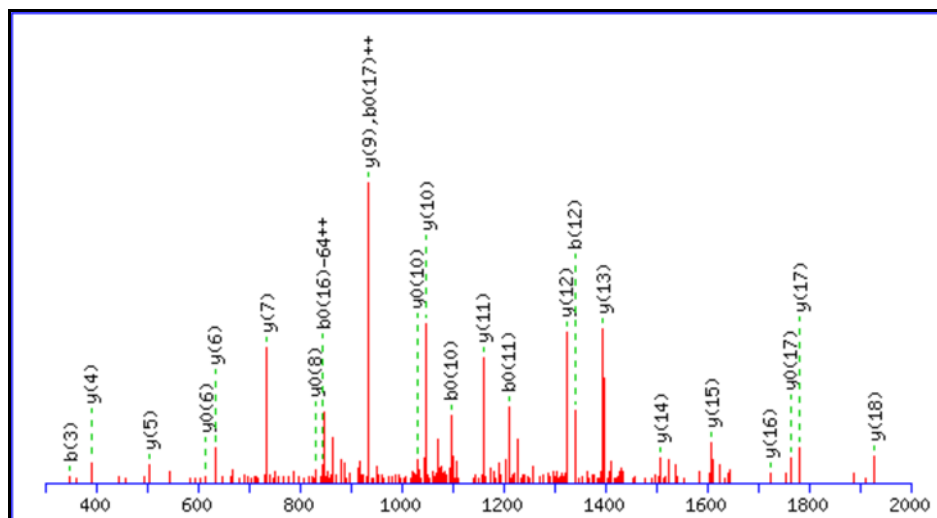

Monoisotopic mass of neutral peptide **Mr(calc)**: 2275.0930

**Fixed modifications**: Carbamidomethyl (C) (apply to specified residues or termini only)

**Variable modifications**:

**M1** : Oxidation (M), with neutral losses 0.0000(shown in table), 63.9983

**Ions Score**: 115 **Expect**: 3.3e-10

**Matches** : 24/272 fragment ions using 32 most intense peaks ([help](#))

| #  | b                | b <sup>++</sup> | b <sup>0</sup>   | b <sup>0++</sup> | Seq. | y                | y <sup>++</sup> | y <sup>*</sup> | y <sup>*++</sup> | y <sup>0</sup>   | y <sup>0++</sup> | #  |
|----|------------------|-----------------|------------------|------------------|------|------------------|-----------------|----------------|------------------|------------------|------------------|----|
| 1  | 148.0427         | 74.5250         |                  |                  | M    |                  |                 |                |                  |                  |                  | 21 |
| 2  | 235.0747         | 118.0410        | 217.0641         | 109.0357         | S    | 2129.0649        | 1065.0361       | 2112.0383      | 1056.5228        | 2111.0543        | 1056.0308        | 20 |
| 3  | <b>348.1588</b>  | 174.5830        | 330.1482         | 165.5777         | L    | 2042.0328        | 1021.5201       | 2025.0063      | 1013.0068        | 2024.0223        | 1012.5148        | 19 |
| 4  | 495.2272         | 248.1172        | 477.2166         | 239.1119         | F    | <b>1928.9488</b> | 964.9780        | 1911.9222      | 956.4647         | 1910.9382        | 955.9727         | 18 |
| 5  | 552.2486         | 276.6280        | 534.2381         | 267.6227         | G    | <b>1781.8804</b> | 891.4438        | 1764.8538      | 882.9305         | <b>1763.8698</b> | 882.4385         | 17 |
| 6  | 667.2756         | 334.1414        | 649.2650         | 325.1361         | D    | <b>1724.8589</b> | 862.9331        | 1707.8323      | 854.4198         | 1706.8483        | 853.9278         | 16 |
| 7  | 768.3233         | 384.6653        | 750.3127         | 375.6600         | T    | <b>1609.8319</b> | 805.4196        | 1592.8054      | 796.9063         | 1591.8214        | 796.4143         | 15 |
| 8  | 881.4073         | 441.2073        | 863.3968         | 432.2020         | I    | <b>1508.7843</b> | 754.8958        | 1491.7577      | 746.3825         | 1490.7737        | 745.8905         | 14 |
| 9  | 952.4444         | 476.7259        | 934.4339         | 467.7206         | A    | <b>1395.7002</b> | 698.3537        | 1378.6737      | 689.8405         | 1377.6896        | 689.3485         | 13 |
| 10 | 1115.5078        | 558.2575        | <b>1097.4972</b> | 549.2522         | Y    | <b>1324.6631</b> | 662.8352        | 1307.6365      | 654.3219         | 1306.6525        | 653.8299         | 12 |
| 11 | 1228.5918        | 614.7996        | <b>1210.5813</b> | 605.7943         | L    | <b>1161.5998</b> | 581.3035        | 1144.5732      | 572.7902         | 1143.5892        | 572.2982         | 11 |
| 12 | <b>1341.6759</b> | 671.3416        | 1323.6653        | 662.3363         | L    | <b>1048.5157</b> | 524.7615        | 1031.4891      | 516.2482         | <b>1030.5051</b> | 515.7562         | 10 |
| 13 | 1428.7079        | 714.8576        | 1410.6974        | 705.8523         | S    | <b>935.4316</b>  | 468.2195        | 918.4051       | 459.7062         | 917.4211         | 459.2142         | 9  |
| 14 | 1541.7920        | 771.3996        | 1523.7814        | 762.3944         | L    | 848.3996         | 424.7034        | 831.3731       | 416.1902         | <b>830.3890</b>  | 415.6982         | 8  |
| 15 | 1642.8397        | 821.9235        | 1624.8291        | 812.9182         | T    | <b>735.3155</b>  | 368.1614        | 718.2890       | 359.6481         | 717.3050         | 359.1561         | 7  |
| 16 | 1771.8823        | 886.4448        | 1753.8717        | 877.4395         | E    | <b>634.2679</b>  | 317.6376        | 617.2413       | 309.1243         | <b>616.2573</b>  | 308.6323         | 6  |
| 17 | 1886.9092        | 943.9582        | 1868.8986        | <b>934.9530</b>  | D    | <b>505.2253</b>  | 253.1163        | 488.1987       | 244.6030         | 487.2147         | 244.1110         | 5  |
| 18 | 1943.9307        | 972.4690        | 1925.9201        | 963.4637         | G    | <b>390.1983</b>  | 195.6028        | 373.1718       | 187.0895         | 372.1878         | 186.5975         | 4  |

|    |           |           |           |           |          |          |          |          |          |          |          |          |
|----|-----------|-----------|-----------|-----------|----------|----------|----------|----------|----------|----------|----------|----------|
| 19 | 2072.9733 | 1036.9903 | 2054.9627 | 1027.9850 | <b>E</b> | 333.1769 | 167.0921 | 316.1503 | 158.5788 | 315.1663 | 158.0868 | <b>3</b> |
| 20 | 2129.9947 | 1065.5010 | 2111.9842 | 1056.4957 | <b>G</b> | 204.1343 | 102.5708 | 187.1077 | 94.0575  |          |          | <b>2</b> |
| 21 |           |           |           |           | <b>K</b> | 147.1128 | 74.0600  | 130.0863 | 65.5468  |          |          | <b>1</b> |

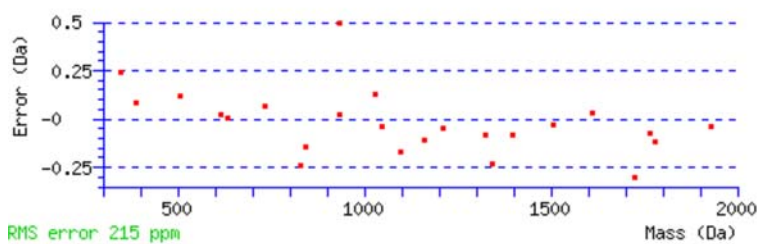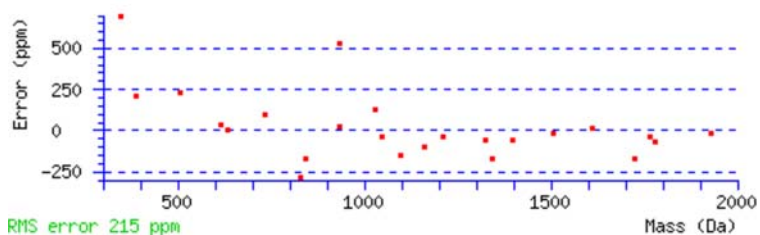

NCBI **BLAST** search of [MSLFGDTIAYLLSLTEDGEGK](#)

(Parameters: blastp, nr protein database, expect=20000, no filter, PAM30)

Other BLAST [web gateways](#)

#### All matches to this query

| Score | Mr(calc): | Delta   | Sequence                                |
|-------|-----------|---------|-----------------------------------------|
| 115.0 | 2275.0930 | -0.0060 | <a href="#">MSLFGDTIAYLLSLTEDGEGK</a>   |
| 13.0  | 2275.0452 | 0.0418  | <a href="#">SLSSPTQSELSHSLTQDQDK</a>    |
| 4.7   | 2275.0807 | 0.0063  | <a href="#">MVPSTNGIANLESGVPQLIPR</a>   |
| 2.6   | 2274.0984 | 0.9886  | <a href="#">KCSEVEDLMGKIASLQAHNK</a>    |
| 2.4   | 2275.1153 | -0.0283 | <a href="#">LNLTIVLTSLELWTEKNK</a>      |
| 2.3   | 2275.1002 | -0.0132 | <a href="#">GKTGGSQDSQPSPLALLAATCSK</a> |
| 1.6   | 2274.0528 | 1.0342  | <a href="#">WFCLTSREFTYHKQDK</a>        |
| 1.3   | 2274.0636 | 1.0234  | <a href="#">MSGTLAKIAEIEAEMARTQK</a>    |
| 1.2   | 2274.0636 | 1.0234  | <a href="#">MSGTLAKIAEIEAEMARTQK</a>    |
| 0.9   | 2273.0382 | 2.0488  | <a href="#">LSIQDNNVDLILATPPFSR</a>     |

Mascot: <http://www.matrixscience.com/>

# Mascot Search Results

## Peptide View

MS/MS Fragmentation of **MSLFGDTIAYLLSLTEDGEGKAELAEK**

Found in **MI**, B/Brisbane/60/2008

Match to Query 8958: 3022.448172 from(1008.490000,3+) intensity(445011.2500)

Title: D120713\_002.17511.17511.3

Data file D120713\_002.mgf.mascot

Click mouse within plot area to zoom in by factor of two about that point

Or, Plot from  to  Da

Label all possible matches  Label matches used for scoring

View spectrum in original style  View spectrum with detailed annotation

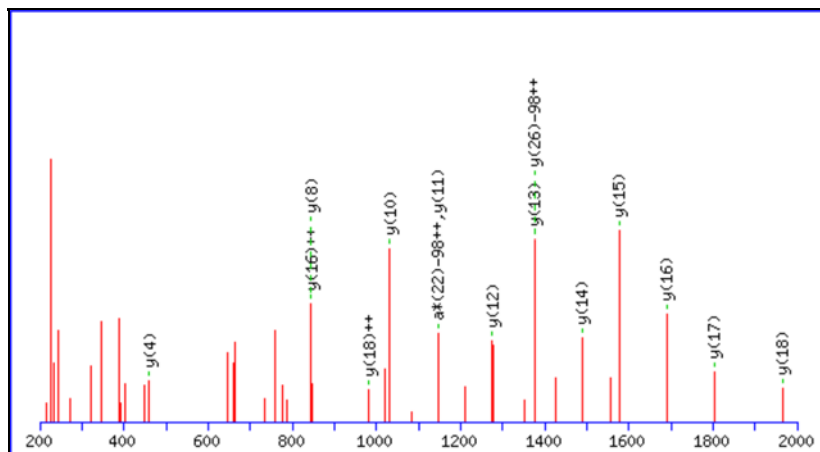

Monoisotopic mass of neutral peptide  $M_r(\text{calc})$ : 3022.4133

Fixed modifications: Carbamidomethyl (C) (apply to specified residues or termini only)

Variable modifications:

N-term : Acetyl (N-term)

T7 : Phospho (ST), with neutral losses 97.9769(shown in table), 0.0000

Ions Score: 82 Expect: 7.5e-06

Matches : 15/360 fragment ions using 16 most intense peaks ([help](#))

| #  | a         | a <sup>++</sup> | a <sup>*</sup> | a <sup>*++</sup> | b         | b <sup>++</sup> | b <sup>*</sup> | b <sup>*++</sup> | Seq. | y         | y <sup>++</sup> | y <sup>*</sup> | y <sup>*++</sup> | #  |
|----|-----------|-----------------|----------------|------------------|-----------|-----------------|----------------|------------------|------|-----------|-----------------|----------------|------------------|----|
| 1  | 146.0634  | 73.5353         |                |                  | 174.0583  | 87.5328         |                |                  | M    |           |                 |                |                  | 27 |
| 2  | 233.0954  | 117.0514        |                |                  | 261.0904  | 131.0488        |                |                  | S    | 2752.3927 | 1376.7000       | 2735.3662      | 1368.1867        | 26 |
| 3  | 346.1795  | 173.5934        |                |                  | 374.1744  | 187.5908        |                |                  | L    | 2665.3607 | 1333.1840       | 2648.3342      | 1324.6707        | 25 |
| 4  | 493.2479  | 247.1276        |                |                  | 521.2428  | 261.1251        |                |                  | F    | 2552.2766 | 1276.6420       | 2535.2501      | 1268.1287        | 24 |
| 5  | 550.2694  | 275.6383        |                |                  | 578.2643  | 289.6358        |                |                  | G    | 2405.2082 | 1203.1078       | 2388.1817      | 1194.5945        | 23 |
| 6  | 665.2963  | 333.1518        |                |                  | 693.2912  | 347.1493        |                |                  | D    | 2348.1868 | 1174.5970       | 2331.1602      | 1166.0837        | 22 |
| 7  | 748.3334  | 374.6704        |                |                  | 776.3284  | 388.6678        |                |                  | T    | 2233.1598 | 1117.0835       | 2216.1333      | 1108.5703        | 21 |
| 8  | 861.4175  | 431.2124        |                |                  | 889.4124  | 445.2098        |                |                  | I    | 2150.1227 | 1075.5650       | 2133.0962      | 1067.0517        | 20 |
| 9  | 932.4546  | 466.7309        |                |                  | 960.4495  | 480.7284        |                |                  | A    | 2037.0386 | 1019.0230       | 2020.0121      | 1010.5097        | 19 |
| 10 | 1095.5179 | 548.2626        |                |                  | 1123.5129 | 562.2601        |                |                  | Y    | 1966.0015 | 983.5044        | 1948.9750      | 974.9911         | 18 |
| 11 | 1208.6020 | 604.8046        |                |                  | 1236.5969 | 618.8021        |                |                  | L    | 1802.9382 | 901.9727        | 1785.9117      | 893.4595         | 17 |
| 12 | 1321.6861 | 661.3467        |                |                  | 1349.6810 | 675.3441        |                |                  | L    | 1689.8541 | 845.4307        | 1672.8276      | 836.9174         | 16 |
| 13 | 1408.7181 | 704.8627        |                |                  | 1436.7130 | 718.8601        |                |                  | S    | 1576.7701 | 788.8887        | 1559.7435      | 780.3754         | 15 |
| 14 | 1521.8022 | 761.4047        |                |                  | 1549.7971 | 775.4022        |                |                  | L    | 1489.7380 | 745.3727        | 1472.7115      | 736.8594         | 14 |
| 15 | 1622.8498 | 811.9286        |                |                  | 1650.8448 | 825.9260        |                |                  | T    | 1376.6540 | 688.8306        | 1359.6274      | 680.3174         | 13 |
| 16 | 1751.8924 | 876.4499        |                |                  | 1779.8874 | 890.4473        |                |                  | E    | 1275.6063 | 638.3068        | 1258.5798      | 629.7935         | 12 |
| 17 | 1866.9194 | 933.9633        |                |                  | 1894.9143 | 947.9608        |                |                  | D    | 1146.5637 | 573.7855        | 1129.5372      | 565.2722         | 11 |
| 18 | 1923.9408 | 962.4741        |                |                  | 1951.9358 | 976.4715        |                |                  | G    | 1031.5368 | 516.2720        | 1014.5102      | 507.7587         | 10 |
| 19 | 2052.9834 | 1026.9954       |                |                  | 2080.9784 | 1040.9928       |                |                  | E    | 974.5153  | 487.7613        | 957.4888       | 479.2480         | 9  |
| 20 | 2110.0049 | 1055.5061       |                |                  | 2137.9998 | 1069.5035       |                |                  | G    | 845.4727  | 423.2400        | 828.4462       | 414.7267         | 8  |

|    |           |           |           |                  |           |           |           |           |          |                 |          |          |          |          |
|----|-----------|-----------|-----------|------------------|-----------|-----------|-----------|-----------|----------|-----------------|----------|----------|----------|----------|
| 21 | 2238.0999 | 1119.5536 | 2221.0733 | 1111.0403        | 2266.0948 | 1133.5510 | 2249.0682 | 1125.0378 | <b>K</b> | 788.4512        | 394.7293 | 771.4247 | 386.2160 | <b>7</b> |
| 22 | 2309.1370 | 1155.0721 | 2292.1104 | <b>1146.5589</b> | 2337.1319 | 1169.0696 | 2320.1053 | 1160.5563 | <b>A</b> | 660.3563        | 330.6818 | 643.3297 | 322.1685 | <b>6</b> |
| 23 | 2438.1796 | 1219.5934 | 2421.1530 | 1211.0801        | 2466.1745 | 1233.5909 | 2449.1479 | 1225.0776 | <b>E</b> | 589.3192        | 295.1632 | 572.2926 | 286.6499 | <b>5</b> |
| 24 | 2551.2636 | 1276.1355 | 2534.2371 | 1267.6222        | 2579.2585 | 1290.1329 | 2562.2320 | 1281.6196 | <b>L</b> | <b>460.2766</b> | 230.6419 | 443.2500 | 222.1287 | <b>4</b> |
| 25 | 2622.3007 | 1311.6540 | 2605.2742 | 1303.1407        | 2650.2957 | 1325.6515 | 2633.2691 | 1317.1382 | <b>A</b> | 347.1925        | 174.0999 | 330.1660 | 165.5866 | <b>3</b> |
| 26 | 2751.3433 | 1376.1753 | 2734.3168 | 1367.6620        | 2779.3383 | 1390.1728 | 2762.3117 | 1381.6595 | <b>E</b> | 276.1554        | 138.5813 | 259.1288 | 130.0681 | <b>2</b> |
| 27 |           |           |           |                  |           |           |           |           | <b>K</b> | 147.1128        | 74.0600  | 130.0863 | 65.5468  | <b>1</b> |

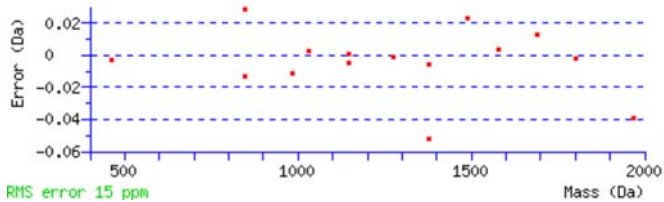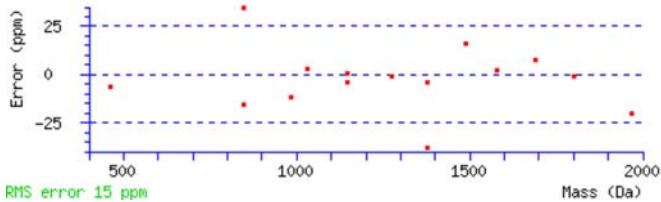

NCBI **BLAST** search of [MSLFGDTIAYLLSLTEDGEGKAELAEK](#)  
 (Parameters: blastp, nr protein database, expect=20000, no filter, PAM30)  
 Other BLAST [web gateways](#)

**All matches to this query**

| Score | Mr(calc): | Delta  | Sequence                                    |
|-------|-----------|--------|---------------------------------------------|
| 82.0  | 3022.4133 | 0.0348 | <a href="#">MSLFGDTIAYLLSLTEDGEGKAELAEK</a> |
| 82.0  | 3022.4133 | 0.0348 | <a href="#">MSLFGDTIAYLLSLTEDGEGKAELAEK</a> |
| 63.6  | 3022.4133 | 0.0348 | <a href="#">MSLFGDTIAYLLSLTEDGEGKAELAEK</a> |
| 27.6  | 3022.4133 | 0.0348 | <a href="#">MSLFGDTIAYLLSLTEDGEGKAELAEK</a> |
| 26.1  | 3020.4261 | 2.0221 | <a href="#">TTISGQMTLTDETL SAVSKSSKSAVK</a> |
| 26.1  | 3020.4261 | 2.0221 | <a href="#">TTISGQMTLTDETL SAVSKSSKSAVK</a> |
| 26.1  | 3020.4261 | 2.0221 | <a href="#">TTISGQMTLTDETL SAVSKSSKSAVK</a> |
| 26.1  | 3020.4261 | 2.0221 | <a href="#">TTISGQMTLTDETL SAVSKSSKSAVK</a> |
| 26.1  | 3020.4261 | 2.0221 | <a href="#">TTISGQMTLTDETL SAVSKSSKSAVK</a> |
| 26.1  | 3020.4261 | 2.0221 | <a href="#">TTISGQMTLTDETL SAVSKSSKSAVK</a> |

**Mascot:** <http://www.matrixscience.com/>

# MASCOT SCIENCE Mascot Search Results

## Peptide View

MS/MS Fragmentation of **MSLFGDTIAYLLSLTEDGEGKAEIAEK**  
 Found in **M1**, B/Brisbane/60/2008

Match to Query 5205: 2916.432273 from(973.151367,3+) intensity(87118.5000)  
 Title: B111206\_011.06633.06633.3  
 Data file B111206\_011.mgf.mascot

Click mouse within plot area to zoom in by factor of two about that point

Or, Plot from  to  Da

Label all possible matches  Label matches used for scoring

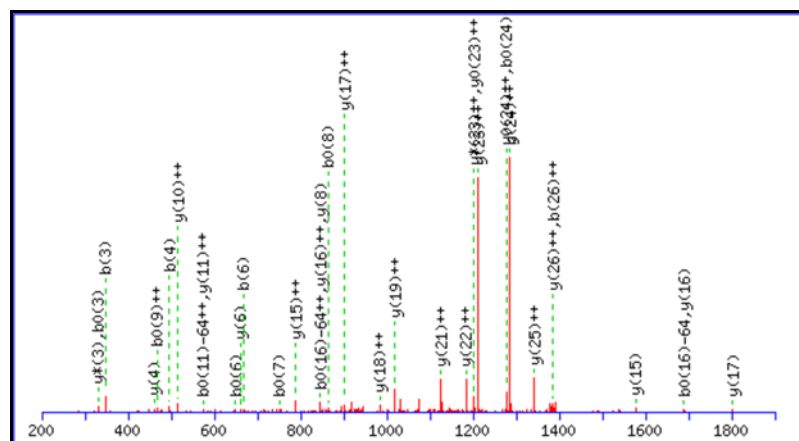

Monoisotopic mass of neutral peptide Mr(calc): 2916.4314  
 Fixed modifications: Carbamidomethyl (C) (apply to specified residues or termini only)  
 Variable modifications:  
 M1 : Oxidation (M), with neutral losses 0.0000(shown in table), 63.9983  
 Ions Score: 89 Expect: 1e-07  
 Matches : 38/382 fragment ions using 42 most intense peaks ([help](#))

| #  | b         | b <sup>++</sup> | b <sup>*</sup> | b <sup>*++</sup> | b <sup>0</sup> | b <sup>0++</sup> | Seq. | y         | y <sup>++</sup> | y <sup>*</sup> | y <sup>*++</sup> | y <sup>0</sup> | y <sup>0++</sup> | #  |
|----|-----------|-----------------|----------------|------------------|----------------|------------------|------|-----------|-----------------|----------------|------------------|----------------|------------------|----|
| 1  | 148.0427  | 74.5250         |                |                  |                |                  | M    |           |                 |                |                  |                |                  | 27 |
| 2  | 235.0747  | 118.0410        |                |                  | 217.0641       | 109.0357         | S    | 2770.4033 | 1385.7053       | 2753.3768      | 1377.1920        | 2752.3927      | 1376.7000        | 26 |
| 3  | 348.1588  | 174.5830        |                |                  | 330.1482       | 165.5777         | L    | 2683.3713 | 1342.1893       | 2666.3447      | 1333.6760        | 2665.3607      | 1333.1840        | 25 |
| 4  | 495.2272  | 248.1172        |                |                  | 477.2166       | 239.1119         | F    | 2570.2872 | 1285.6472       | 2553.2607      | 1277.1340        | 2552.2766      | 1276.6420        | 24 |
| 5  | 552.2486  | 276.6280        |                |                  | 534.2381       | 267.6227         | G    | 2423.2188 | 1212.1130       | 2406.1922      | 1203.5998        | 2405.2082      | 1203.1078        | 23 |
| 6  | 667.2756  | 334.1414        |                |                  | 649.2650       | 325.1361         | D    | 2366.1973 | 1183.6023       | 2349.1708      | 1175.0890        | 2348.1868      | 1174.5970        | 22 |
| 7  | 768.3233  | 384.6653        |                |                  | 750.3127       | 375.6600         | T    | 2251.1704 | 1126.0888       | 2234.1438      | 1117.5756        | 2233.1598      | 1117.0835        | 21 |
| 8  | 881.4073  | 441.2073        |                |                  | 863.3968       | 432.2020         | I    | 2150.1227 | 1075.5650       | 2133.0962      | 1067.0517        | 2132.1121      | 1066.5597        | 20 |
| 9  | 952.4444  | 476.7259        |                |                  | 934.4339       | 467.7206         | A    | 2037.0386 | 1019.0230       | 2020.0121      | 1010.5097        | 2019.0281      | 1010.0177        | 19 |
| 10 | 1115.5078 | 558.2575        |                |                  | 1097.4972      | 549.2522         | Y    | 1966.0015 | 983.5044        | 1948.9750      | 974.9911         | 1947.9910      | 974.4991         | 18 |
| 11 | 1228.5918 | 614.7996        |                |                  | 1210.5813      | 605.7943         | L    | 1802.9382 | 901.9727        | 1785.9117      | 893.4595         | 1784.9276      | 892.9675         | 17 |
| 12 | 1341.6759 | 671.3416        |                |                  | 1323.6653      | 662.3363         | L    | 1689.8541 | 845.4307        | 1672.8276      | 836.9174         | 1671.8436      | 836.4254         | 16 |
| 13 | 1428.7079 | 714.8576        |                |                  | 1410.6974      | 705.8523         | S    | 1576.7701 | 788.8887        | 1559.7435      | 780.3754         | 1558.7595      | 779.8834         | 15 |
| 14 | 1541.7920 | 771.3996        |                |                  | 1523.7814      | 762.3944         | L    | 1489.7380 | 745.3727        | 1472.7115      | 736.8594         | 1471.7275      | 736.3674         | 14 |
| 15 | 1642.8397 | 821.9235        |                |                  | 1624.8291      | 812.9182         | T    | 1376.6540 | 688.8306        | 1359.6274      | 680.3174         | 1358.6434      | 679.8253         | 13 |
| 16 | 1771.8823 | 886.4448        |                |                  | 1753.8717      | 877.4395         | E    | 1275.6063 | 638.3068        | 1258.5798      | 629.7935         | 1257.5957      | 629.3015         | 12 |
| 17 | 1886.9092 | 943.9582        |                |                  | 1868.8986      | 934.9530         | D    | 1146.5637 | 573.7855        | 1129.5372      | 565.2722         | 1128.5531      | 564.7802         | 11 |
| 18 | 1943.9307 | 972.4690        |                |                  | 1925.9201      | 963.4637         | G    | 1031.5368 | 516.2720        | 1014.5102      | 507.7587         | 1013.5262      | 507.2667         | 10 |
| 19 | 2072.9733 | 1036.9903       |                |                  | 2054.9627      | 1027.9850        | E    | 974.5153  | 487.7613        | 957.4888       | 479.2480         | 956.5047       | 478.7560         | 9  |
| 20 | 2129.9947 | 1065.5010       |                |                  | 2111.9842      | 1056.4957        | G    | 845.4727  | 423.2400        | 828.4462       | 414.7267         | 827.4621       | 414.2347         | 8  |
| 21 | 2258.0897 | 1129.5485       | 2241.0631      | 1121.0352        | 2240.0791      | 1120.5432        | K    | 788.4512  | 394.7293        | 771.4247       | 386.2160         | 770.4407       | 385.7240         | 7  |
| 22 | 2329.1268 | 1165.0670       | 2312.1003      | 1156.5538        | 2311.1162      | 1156.0618        | A    | 660.3563  | 330.6818        | 643.3297       | 322.1685         | 642.3457       | 321.6765         | 6  |
| 23 | 2458.1694 | 1229.5883       | 2441.1429      | 1221.0751        | 2440.1588      | 1220.5831        | E    | 589.3192  | 295.1632        | 572.2926       | 286.6499         | 571.3086       | 286.1579         | 5  |
| 24 | 2571.2535 | 1286.1304       | 2554.2269      | 1277.6171        | 2553.2429      | 1277.1251        | L    | 460.2766  | 230.6419        | 443.2500       | 222.1287         | 442.2660       | 221.6366         | 4  |
| 25 | 2642.2906 | 1321.6489       | 2625.2640      | 1313.1357        | 2624.2800      | 1312.6436        | A    | 347.1925  | 174.0999        | 330.1660       | 165.5866         | 329.1819       | 165.0946         | 3  |
| 26 | 2771.3332 | 1386.1702       | 2754.3066      | 1377.6569        | 2753.3226      | 1377.1649        | E    | 276.1554  | 138.5813        | 259.1288       | 130.0681         | 258.1448       | 129.5761         | 2  |
| 27 |           |                 |                |                  |                |                  | K    | 147.1128  | 74.0600         | 130.0863       | 65.5468          |                |                  | 1  |

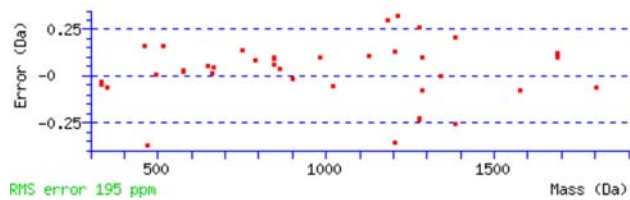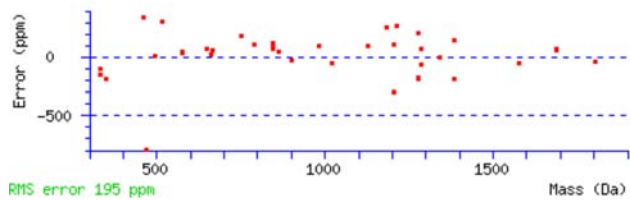

NCBI **BLAST** search of [MSLFGDTIAYLLSLTEDGEGKAELAEK](#)  
 (Parameters: blastp, nr protein database, expect=20000, no filter, PAM30)  
 Other BLAST [web gateways](#)

**All matches to this query**

| Score | Mr(calc): | Delta   | Sequence                                    |
|-------|-----------|---------|---------------------------------------------|
| 88.7  | 2916.4314 | 0.0009  | <a href="#">MSLFGDTIAYLLSLTEDGEGKAELAEK</a> |
| 13.3  | 2916.4684 | -0.0361 | <a href="#">TNLLQVCERIPTISTQLKILSTVK</a>    |
| 12.5  | 2916.3914 | 0.0408  | <a href="#">QQIMEKQYGFNEILKHINELSMK</a>     |
| 11.5  | 2915.4844 | 0.9479  | <a href="#">TNLLQVCERIPTISTQLKILSTVK</a>    |
| 11.2  | 2914.4068 | 2.0254  | <a href="#">ELTGDMQLSKGEILRTQMLVTTPEK</a>   |
| 10.8  | 2915.4844 | 0.9479  | <a href="#">TNLLQVCERIPTISTQLKILSTVK</a>    |
| 10.8  | 2916.4684 | -0.0361 | <a href="#">TNLLQVCERIPTISTQLKILSTVK</a>    |
| 10.2  | 2916.3996 | 0.0326  | <a href="#">NAISLPAIGGSQALMLPLSPVTFNSK</a>  |
| 9.5   | 2916.4684 | -0.0361 | <a href="#">TNLLQVCERIPTISTQLKILSTVK</a>    |
| 8.2   | 2914.4598 | 1.9724  | <a href="#">ACIFGTTSLISHCLRKGENIAFVLK</a>   |

**Mascot:** <http://www.matrixscience.com/>



# MATRIX SCIENCE Mascot Search Results

## Peptide View

MS/MS Fragmentation of **SLFGDTIAYLLSLTEDGEGK**

Found in **M1**, B/Brisbane/60/2008

Match to Query 3937: 2128.061132 from(1065.037842,2+) intensity(105798.0000)

Title: B111206\_011.06960.06960.2

Data file B111206\_011.mgf.mascot

Click mouse within plot area to zoom in by factor of two about that point

Or, Plot from  to  Da

Label all possible matches  Label matches used for scoring

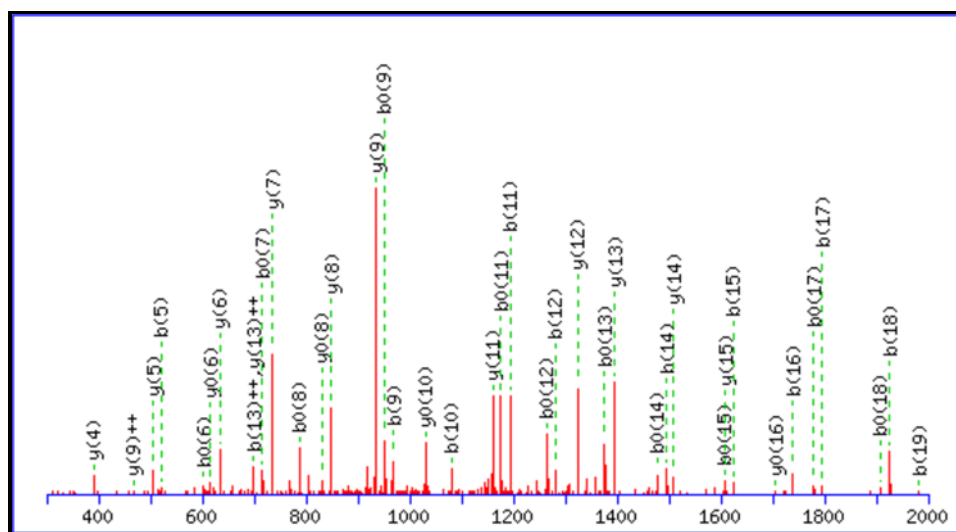

Monoisotopic mass of neutral peptide  $M_r(\text{calc})$ : 2128.0576

Fixed modifications: Carbamidomethyl (C) (apply to specified residues or termini only)

Ions Score: 95 Expect: 9.8e-09

Matches : 40/186 fragment ions using 51 most intense peaks ([help](#))

| #  | b                | b <sup>++</sup> | b <sup>0</sup>   | b <sup>0++</sup> | Seq. | y                | y <sup>++</sup> | y*        | y <sup>*++</sup> | y <sup>0</sup>   | y <sup>0++</sup> | #  |
|----|------------------|-----------------|------------------|------------------|------|------------------|-----------------|-----------|------------------|------------------|------------------|----|
| 1  | 88.0393          | 44.5233         | 70.0287          | 35.5180          | S    |                  |                 |           |                  |                  |                  | 20 |
| 2  | 201.1234         | 101.0653        | 183.1128         | 92.0600          | L    | 2042.0328        | 1021.5201       | 2025.0063 | 1013.0068        | 2024.0223        | 1012.5148        | 19 |
| 3  | 348.1918         | 174.5995        | 330.1812         | 165.5942         | F    | 1928.9488        | 964.9780        | 1911.9222 | 956.4647         | 1910.9382        | 955.9727         | 18 |
| 4  | 405.2132         | 203.1103        | 387.2027         | 194.1050         | G    | 1781.8804        | 891.4438        | 1764.8538 | 882.9305         | 1763.8698        | 882.4385         | 17 |
| 5  | <b>520.2402</b>  | 260.6237        | 502.2296         | 251.6184         | D    | 1724.8589        | 862.9331        | 1707.8323 | 854.4198         | <b>1706.8483</b> | 853.9278         | 16 |
| 6  | 621.2879         | 311.1476        | <b>603.2773</b>  | 302.1423         | T    | <b>1609.8319</b> | 805.4196        | 1592.8054 | 796.9063         | 1591.8214        | 796.4143         | 15 |
| 7  | 734.3719         | 367.6896        | <b>716.3614</b>  | 358.6843         | I    | <b>1508.7843</b> | 754.8958        | 1491.7577 | 746.3825         | 1490.7737        | 745.8905         | 14 |
| 8  | 805.4090         | 403.2082        | <b>787.3985</b>  | 394.2029         | A    | <b>1395.7002</b> | <b>698.3537</b> | 1378.6737 | 689.8405         | 1377.6896        | 689.3485         | 13 |
| 9  | <b>968.4724</b>  | 484.7398        | <b>950.4618</b>  | 475.7345         | Y    | <b>1324.6631</b> | 662.8352        | 1307.6365 | 654.3219         | 1306.6525        | 653.8299         | 12 |
| 10 | <b>1081.5564</b> | 541.2819        | 1063.5459        | 532.2766         | L    | <b>1161.5998</b> | 581.3035        | 1144.5732 | 572.7902         | 1143.5892        | 572.2982         | 11 |
| 11 | <b>1194.6405</b> | 597.8239        | <b>1176.6299</b> | 588.8186         | L    | 1048.5157        | 524.7615        | 1031.4891 | 516.2482         | <b>1030.5051</b> | 515.7562         | 10 |
| 12 | <b>1281.6725</b> | 641.3399        | <b>1263.6620</b> | 632.3346         | S    | <b>935.4316</b>  | <b>468.2195</b> | 918.4051  | 459.7062         | 917.4211         | 459.2142         | 9  |
| 13 | 1394.7566        | <b>697.8819</b> | <b>1376.7460</b> | 688.8767         | L    | <b>848.3996</b>  | 424.7034        | 831.3731  | 416.1902         | <b>830.3890</b>  | 415.6982         | 8  |
| 14 | <b>1495.8043</b> | 748.4058        | <b>1477.7937</b> | 739.4005         | T    | <b>735.3155</b>  | 368.1614        | 718.2890  | 359.6481         | 717.3050         | 359.1561         | 7  |
| 15 | <b>1624.8469</b> | 812.9271        | <b>1606.8363</b> | 803.9218         | E    | <b>634.2679</b>  | 317.6376        | 617.2413  | 309.1243         | <b>616.2573</b>  | 308.6323         | 6  |
| 16 | <b>1739.8738</b> | 870.4405        | 1721.8632        | 861.4353         | D    | <b>505.2253</b>  | 253.1163        | 488.1987  | 244.6030         | 487.2147         | 244.1110         | 5  |
| 17 | <b>1796.8953</b> | 898.9513        | <b>1778.8847</b> | 889.9460         | G    | <b>390.1983</b>  | 195.6028        | 373.1718  | 187.0895         | 372.1878         | 186.5975         | 4  |
| 18 | <b>1925.9379</b> | 963.4726        | <b>1907.9273</b> | 954.4673         | E    | 333.1769         | 167.0921        | 316.1503  | 158.5788         | 315.1663         | 158.0868         | 3  |

|    |                  |          |           |          |          |          |          |          |         |  |  |          |
|----|------------------|----------|-----------|----------|----------|----------|----------|----------|---------|--|--|----------|
| 19 | <b>1982.9593</b> | 991.9833 | 1964.9488 | 982.9780 | <b>G</b> | 204.1343 | 102.5708 | 187.1077 | 94.0575 |  |  | <b>2</b> |
| 20 |                  |          |           |          | <b>K</b> | 147.1128 | 74.0600  | 130.0863 | 65.5468 |  |  | <b>1</b> |

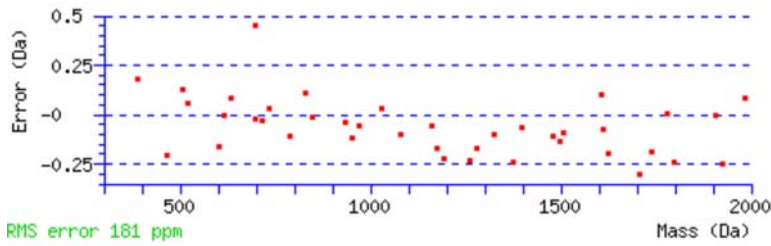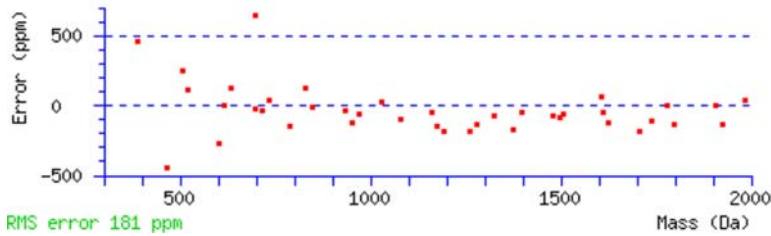

NCBI **BLAST** search of [SLFGDTIAYLLSLTEDGEGK](#)  
 (Parameters: blastp, nr protein database, expect=20000, no filter, PAM30)  
 Other BLAST [web gateways](#)

**All matches to this query**

| Score | Mr(calc): | Delta   | Sequence                             |
|-------|-----------|---------|--------------------------------------|
| 95.4  | 2128.0576 | 0.0036  | <a href="#">SLFGDTIAYLLSLTEDGEGK</a> |
| 9.3   | 2126.0565 | 2.0046  | <a href="#">ISKLFEQMSQTVTDEDKK</a>   |
| 9.0   | 2128.0396 | 0.0215  | <a href="#">SNSDSEIQADLQHSSILRK</a>  |
| 8.7   | 2128.0245 | 0.0366  | <a href="#">ISKLFEQMSQTVTDEDKK</a>   |
| 6.2   | 2128.0806 | -0.0195 | <a href="#">KVGSTNAESLVLRRPK</a>     |
| 5.8   | 2128.0806 | -0.0195 | <a href="#">KVGSTNAESLVLRRPK</a>     |
| 5.8   | 2128.0806 | -0.0195 | <a href="#">KVGSTNAESLVLRRPK</a>     |
| 4.8   | 2128.0670 | -0.0058 | <a href="#">AFNEMRVSLYLNLSRCR</a>    |
| 4.5   | 2127.0405 | 1.0206  | <a href="#">ISKLFEQMSQTVTDEDKK</a>   |
| 4.4   | 2127.0556 | 1.0055  | <a href="#">SNSDSEIQADLQHSSILRK</a>  |

**Mascot:** <http://www.matrixscience.com/>

# MASCOT SCIENCE Mascot Search Results

## Peptide View

MS/MS Fragmentation of **SLFGDTIAYLLSLTEDGEGK**

Found in **M1**, B/Brisbane/60/2008

Match to Query 4009: 2170.074072 from(1086.044312,2+) intensity(95160000.0000)

Title: B111206\_011.07475.07475.2

Data file B111206\_011.mgf.mascot

Click mouse within plot area to zoom in by factor of two about that point

Or, Plot from  to  Da

Label all possible matches  Label matches used for scoring

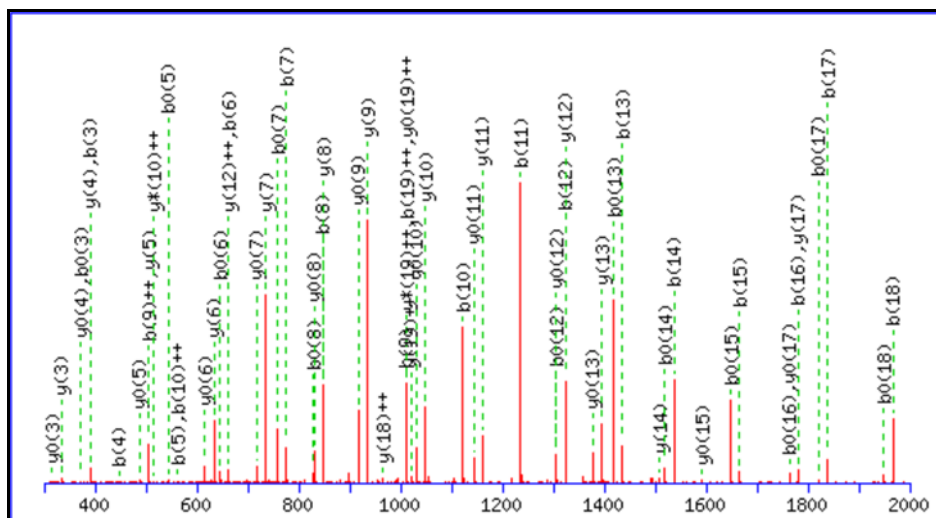

Monoisotopic mass of neutral peptide **Mr(calc)**: 2170.0681

**Fixed modifications:** Carbamidomethyl (C) (apply to specified residues or termini only)

**Variable modifications:**

**N-term** : Acetyl (Protein N-term)

**Ions Score:** 142 **Expect:** 2.8e-12

**Matches** : 63/186 fragment ions using 68 most intense peaks ([help](#))

| #  | b                | b <sup>++</sup> | b <sup>0</sup>   | b <sup>0++</sup> | Seq. | y                | y <sup>++</sup> | y <sup>*</sup> | y <sup>*++</sup> | y <sup>0</sup>   | y <sup>0++</sup> | #  |
|----|------------------|-----------------|------------------|------------------|------|------------------|-----------------|----------------|------------------|------------------|------------------|----|
| 1  | 130.0499         | 65.5286         | 112.0393         | 56.5233          | S    |                  |                 |                |                  |                  |                  | 20 |
| 2  | 243.1339         | 122.0706        | 225.1234         | 113.0653         | L    | 2042.0328        | 1021.5201       | 2025.0063      | 1013.0068        | 2024.0223        | 1012.5148        | 19 |
| 3  | <b>390.2023</b>  | 195.6048        | <b>372.1918</b>  | 186.5995         | F    | 1928.9488        | <b>964.9780</b> | 1911.9222      | 956.4647         | 1910.9382        | 955.9727         | 18 |
| 4  | <b>447.2238</b>  | 224.1155        | 429.2132         | 215.1103         | G    | <b>1781.8804</b> | 891.4438        | 1764.8538      | 882.9305         | <b>1763.8698</b> | 882.4385         | 17 |
| 5  | <b>562.2508</b>  | 281.6290        | <b>544.2402</b>  | 272.6237         | D    | 1724.8589        | 862.9331        | 1707.8323      | 854.4198         | 1706.8483        | 853.9278         | 16 |
| 6  | <b>663.2984</b>  | 332.1529        | <b>645.2879</b>  | 323.1476         | T    | 1609.8319        | 805.4196        | 1592.8054      | 796.9063         | <b>1591.8214</b> | 796.4143         | 15 |
| 7  | <b>776.3825</b>  | 388.6949        | <b>758.3719</b>  | 379.6896         | I    | <b>1508.7843</b> | 754.8958        | 1491.7577      | 746.3825         | 1490.7737        | 745.8905         | 14 |
| 8  | <b>847.4196</b>  | 424.2134        | <b>829.4090</b>  | 415.2082         | A    | <b>1395.7002</b> | 698.3537        | 1378.6737      | 689.8405         | <b>1377.6896</b> | 689.3485         | 13 |
| 9  | <b>1010.4829</b> | <b>505.7451</b> | 992.4724         | 496.7398         | Y    | <b>1324.6631</b> | <b>662.8352</b> | 1307.6365      | 654.3219         | <b>1306.6525</b> | 653.8299         | 12 |
| 10 | <b>1123.5670</b> | <b>562.2871</b> | 1105.5564        | 553.2819         | L    | <b>1161.5998</b> | 581.3035        | 1144.5732      | 572.7902         | <b>1143.5892</b> | 572.2982         | 11 |
| 11 | <b>1236.6511</b> | 618.8292        | 1218.6405        | 609.8239         | L    | <b>1048.5157</b> | 524.7615        | 1031.4891      | <b>516.2482</b>  | <b>1030.5051</b> | 515.7562         | 10 |
| 12 | <b>1323.6831</b> | 662.3452        | <b>1305.6725</b> | 653.3399         | S    | <b>935.4316</b>  | 468.2195        | 918.4051       | 459.7062         | <b>917.4211</b>  | 459.2142         | 9  |
| 13 | <b>1436.7672</b> | 718.8872        | <b>1418.7566</b> | 709.8819         | L    | <b>848.3996</b>  | 424.7034        | 831.3731       | 416.1902         | <b>830.3890</b>  | 415.6982         | 8  |
| 14 | <b>1537.8148</b> | 769.4111        | <b>1519.8043</b> | 760.4058         | T    | <b>735.3155</b>  | 368.1614        | 718.2890       | 359.6481         | <b>717.3050</b>  | 359.1561         | 7  |
| 15 | <b>1666.8574</b> | 833.9324        | <b>1648.8469</b> | 824.9271         | E    | <b>634.2679</b>  | 317.6376        | 617.2413       | 309.1243         | <b>616.2573</b>  | 308.6323         | 6  |
| 16 | <b>1781.8844</b> | 891.4458        | <b>1763.8738</b> | 882.4405         | D    | <b>505.2253</b>  | 253.1163        | 488.1987       | 244.6030         | <b>487.2147</b>  | 244.1110         | 5  |
| 17 | <b>1838.9058</b> | 919.9566        | <b>1820.8953</b> | 910.9513         | G    | <b>390.1983</b>  | 195.6028        | 373.1718       | 187.0895         | <b>372.1878</b>  | 186.5975         | 4  |
| 18 | <b>1967.9484</b> | 984.4779        | <b>1949.9379</b> | 975.4726         | E    | <b>333.1769</b>  | 167.0921        | 316.1503       | 158.5788         | <b>315.1663</b>  | 158.0868         | 3  |

|    |           |           |           |           |   |          |          |          |         |  |  |   |
|----|-----------|-----------|-----------|-----------|---|----------|----------|----------|---------|--|--|---|
| 19 | 2024.9699 | 1012.9886 | 2006.9593 | 1003.9833 | G | 204.1343 | 102.5708 | 187.1077 | 94.0575 |  |  | 2 |
| 20 |           |           |           |           | K | 147.1128 | 74.0600  | 130.0863 | 65.5468 |  |  | 1 |

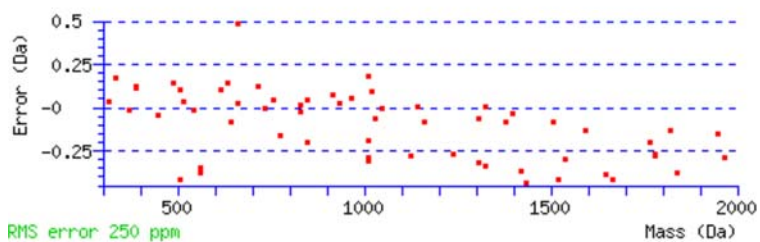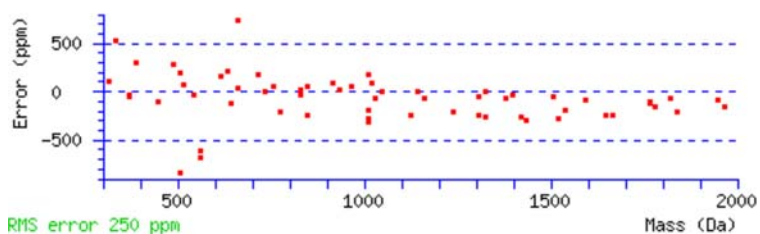

NCBI **BLAST** search of [SLFGDTIAYLLSLTEDGEGK](#)

(Parameters: blastp, nr protein database, expect=20000, no filter, PAM30)

Other BLAST [web gateways](#)

#### All matches to this query

| Score | Mr(calc): | Delta   | Sequence                             |
|-------|-----------|---------|--------------------------------------|
| 141.6 | 2170.0681 | 0.0059  | <a href="#">SLFGDTIAYLLSLTEDGEGK</a> |
| 19.1  | 2170.1166 | -0.0425 | <a href="#">AVGAMWAAEIPLLLQCLQGK</a> |
| 9.9   | 2170.0616 | 0.0125  | <a href="#">NFXWDTVTSKIELNQKMK</a>   |
| 6.3   | 2169.0293 | 1.0447  | <a href="#">MAEVTAEGRMSTITITDGGK</a> |
| 6.0   | 2170.0438 | 0.0303  | <a href="#">TLPLEIFQMLLSYLSVK</a>    |
| 5.7   | 2168.0970 | 1.9771  | <a href="#">GKMCVVVADISTQLGLYASR</a> |
| 4.6   | 2168.0724 | 2.0017  | <a href="#">EFLPGEELHALHLVYNMR</a>   |
| 4.3   | 2170.0679 | 0.0061  | <a href="#">VNTWRLLLCEATATIMAK</a>   |
| 4.2   | 2169.0445 | 1.0296  | <a href="#">LLVLTQSSAYVVEMAKIK</a>   |
| 4.0   | 2170.0438 | 0.0303  | <a href="#">TLPLEIFQMLLSYLSVK</a>    |

Mascot: <http://www.matrixscience.com/>

# MASCOT SCIENCE Mascot Search Results

## Peptide View

MS/MS Fragmentation of **SLFGDTIAYLLSLTEDGEGKAELA EK**

Found in **MI**, B/Brisbane/60/2008

Match to Query 4364: 2811.422934 from(938.148254,3+) intensity(84330344.0000)

Title: B120210\_017.07116.07116.3

Data file B120210\_017.mgf.mascot

Click mouse within plot area to zoom in by factor of two about that point

Or, Plot from  to  Da

Label all possible matches  Label matches used for scoring

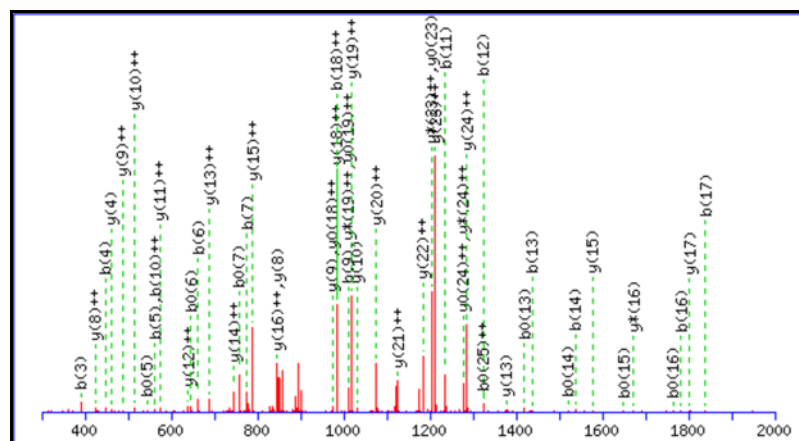

Monoisotopic mass of neutral peptide Mr(calc): 2811.4065

Fixed modifications: Carbamidomethyl (C) (apply to specified residues or termini only)

Variable modifications:

N-term : Acetyl (Protein N-term)

Ions Score: 124 Expect: 2.2e-11

Matches : 53/260 fragment ions using 63 most intense peaks ([help](#))

| #  | b                | b <sup>++</sup> | b <sup>*</sup> | b <sup>*++</sup> | b <sup>0</sup>   | b <sup>0++</sup> | Seq. | y                | y <sup>++</sup>  | y <sup>*</sup>   | y <sup>*++</sup> | y <sup>0</sup> | y <sup>0++</sup> | #  |
|----|------------------|-----------------|----------------|------------------|------------------|------------------|------|------------------|------------------|------------------|------------------|----------------|------------------|----|
| 1  | 130.0499         | 65.5286         |                |                  | 112.0393         | 56.5233          | S    |                  |                  |                  |                  |                |                  | 26 |
| 2  | 243.1339         | 122.0706        |                |                  | 225.1234         | 113.0653         | L    | 2683.3713        | 1342.1893        | 2666.3447        | 1333.6760        | 2665.3607      | 1333.1840        | 25 |
| 3  | <b>390.2023</b>  | 195.6048        |                |                  | 372.1918         | 186.5995         | F    | 2570.2872        | <b>1285.6472</b> | 2553.2607        | <b>1277.1340</b> | 2552.2766      | <b>1276.6420</b> | 24 |
| 4  | <b>447.2238</b>  | 224.1155        |                |                  | 429.2132         | 215.1103         | G    | 2423.2188        | <b>1212.1130</b> | 2406.1922        | <b>1203.5998</b> | 2405.2082      | <b>1203.1078</b> | 23 |
| 5  | <b>562.2508</b>  | 281.6290        |                |                  | <b>544.2402</b>  | 272.6237         | D    | 2366.1973        | <b>1183.6023</b> | 2349.1708        | 1175.0890        | 2348.1868      | 1174.5970        | 22 |
| 6  | <b>663.2984</b>  | 332.1529        |                |                  | <b>645.2879</b>  | 323.1476         | T    | 2251.1704        | <b>1126.0888</b> | 2234.1438        | 1117.5756        | 2233.1598      | 1117.0835        | 21 |
| 7  | <b>776.3825</b>  | 388.6949        |                |                  | <b>758.3719</b>  | 379.6896         | I    | 2150.1227        | <b>1075.5650</b> | 2133.0962        | 1067.0517        | 2132.1121      | 1066.5597        | 20 |
| 8  | 847.4196         | 424.2134        |                |                  | 829.4090         | 415.2082         | A    | 2037.0386        | <b>1019.0230</b> | 2020.0121        | <b>1010.5097</b> | 2019.0281      | <b>1010.0177</b> | 19 |
| 9  | <b>1010.4829</b> | 505.7451        |                |                  | 992.4724         | 496.7398         | Y    | 1966.0015        | <b>983.5044</b>  | 1948.9750        | 974.9911         | 1947.9910      | <b>974.4991</b>  | 18 |
| 10 | 1123.5670        | <b>562.2871</b> |                |                  | 1105.5564        | 553.2819         | L    | <b>1802.9382</b> | 901.9727         | 1785.9117        | 893.4595         | 1784.9276      | 892.9675         | 17 |
| 11 | <b>1236.6511</b> | 618.8292        |                |                  | 1218.6405        | 609.8239         | L    | 1689.8541        | <b>845.4307</b>  | <b>1672.8276</b> | 836.9174         | 1671.8436      | 836.4254         | 16 |
| 12 | <b>1323.6831</b> | 662.3452        |                |                  | 1305.6725        | 653.3399         | S    | <b>1576.7701</b> | <b>788.8887</b>  | 1559.7435        | 780.3754         | 1558.7595      | 779.8834         | 15 |
| 13 | <b>1436.7672</b> | 718.8872        |                |                  | <b>1418.7566</b> | 709.8819         | L    | 1489.7380        | <b>745.3727</b>  | 1472.7115        | 736.8594         | 1471.7275      | 736.3674         | 14 |
| 14 | <b>1537.8148</b> | 769.4111        |                |                  | <b>1519.8043</b> | 760.4058         | T    | <b>1376.6540</b> | <b>688.8306</b>  | 1359.6274        | 680.3174         | 1358.6434      | 679.8253         | 13 |
| 15 | 1666.8574        | 833.9324        |                |                  | <b>1648.8469</b> | 824.9271         | E    | 1275.6063        | <b>638.3068</b>  | 1258.5798        | 629.7935         | 1257.5957      | 629.3015         | 12 |
| 16 | <b>1781.8844</b> | 891.4458        |                |                  | <b>1763.8738</b> | 882.4405         | D    | 1146.5637        | <b>573.7855</b>  | 1129.5372        | 565.2722         | 1128.5531      | 564.7802         | 11 |
| 17 | <b>1838.9058</b> | 919.9566        |                |                  | 1820.8953        | 910.9513         | G    | <b>1031.5368</b> | <b>516.2720</b>  | 1014.5102        | 507.7587         | 1013.5262      | 507.2667         | 10 |
| 18 | 1967.9484        | <b>984.4779</b> |                |                  | 1949.9379        | 975.4726         | E    | <b>974.5153</b>  | <b>487.7613</b>  | 957.4888         | 479.2480         | 956.5047       | 478.7560         | 9  |
| 19 | 2024.9699        | 1012.9886       |                |                  | 2006.9593        | 1003.9833        | G    | <b>845.4727</b>  | <b>423.2400</b>  | 828.4462         | 414.7267         | 827.4621       | 414.2347         | 8  |
| 20 | 2153.0649        | 1077.0361       | 2136.0383      | 1068.5228        | 2135.0543        | 1068.0308        | K    | 788.4512         | 394.7293         | 771.4247         | 386.2160         | 770.4407       | 385.7240         | 7  |
| 21 | 2224.1020        | 1112.5546       | 2207.0754      | 1104.0413        | 2206.0914        | 1103.5493        | A    | 660.3563         | 330.6818         | 643.3297         | 322.1685         | 642.3457       | 321.6765         | 6  |
| 22 | 2353.1446        | 1177.0759       | 2336.1180      | 1168.5626        | 2335.1340        | 1168.0706        | E    | 589.3192         | 295.1632         | 572.2926         | 286.6499         | 571.3086       | 286.1579         | 5  |
| 23 | 2466.2286        | 1233.6180       | 2449.2021      | 1225.1047        | 2448.2181        | 1224.6127        | L    | <b>460.2766</b>  | 230.6419         | 443.2500         | 222.1287         | 442.2660       | 221.6366         | 4  |
| 24 | 2537.2657        | 1269.1365       | 2520.2392      | 1260.6232        | 2519.2552        | 1260.1312        | A    | 347.1925         | 174.0999         | 330.1660         | 165.5866         | 329.1819       | 165.0946         | 3  |
| 25 | 2666.3083        | 1333.6578       | 2649.2818      | 1325.1445        | 2648.2978        | <b>1324.6525</b> | E    | 276.1554         | 138.5813         | 259.1288         | 130.0681         | 258.1448       | 129.5761         | 2  |
| 26 |                  |                 |                |                  |                  |                  | K    | 147.1128         | 74.0600          | 130.0863         | 65.5468          |                |                  | 1  |

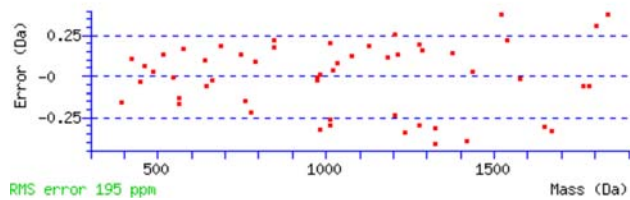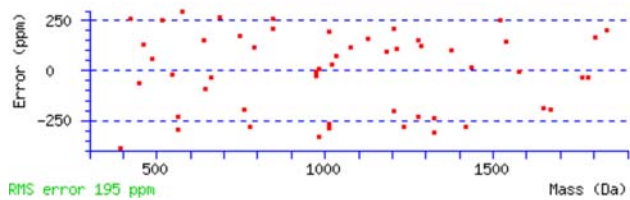

NCBI BLAST search of [SLFGDTIAYLLSLTEDGEGKAELAEK](#)  
 (Parameters: blastp, nr protein database, expect=20000, no filter, PAM30)  
 Other BLAST [web gateways](#)

**All matches to this query**

| Score | Mr(calc): | Delta   | Sequence                                   |
|-------|-----------|---------|--------------------------------------------|
| 123.6 | 2811.4065 | 0.0164  | <a href="#">SLFGDTIAYLLSLTEDGEGKAELAEK</a> |
| 9.3   | 2810.3877 | 1.0353  | <a href="#">KLMTEMHVNSPVQVVINKLPTIK</a>    |
| 6.9   | 2810.4136 | 1.0094  | <a href="#">EDALQAATVANLRAALMSKNSLLSLK</a> |
| 6.0   | 2811.4559 | -0.0329 | <a href="#">KIVIATNIAETSITIDVVFFVIDGGK</a> |
| 5.5   | 2809.4248 | 1.9981  | <a href="#">QLESEWSFLIVTDYLLQCPELVK</a>    |
| 5.5   | 2810.4088 | 1.0141  | <a href="#">QLESEWSFLIVTDYLLQCPELVK</a>    |
| 5.0   | 2811.3717 | 0.0513  | <a href="#">KLMTEMHVNSPVQVVINKLPTIK</a>    |
| 5.0   | 2811.3717 | 0.0513  | <a href="#">KLMTEMHVNSPVQVVINKLPTIK</a>    |
| 4.4   | 2811.4766 | -0.0537 | <a href="#">ELRGLSLHTNNISSLPEGIFRSLQK</a>  |
| 4.1   | 2811.4559 | -0.0329 | <a href="#">KIVIATNIAETSITIDVVFFVIDGGK</a> |

Mascot: <http://www.matrixscience.com/>



# MASCOT SCIENCE Mascot Search Results

## Peptide View

MS/MS Fragmentation of **ANNMTTTTQIEWR**

Found in **NEP**, B/Brisbane/60/2008

Match to Query 3568: 1620.745448 from(811.380000,2+) intensity(4710422.5000)

Title: D120713\_002.13017.13017.2

Data file D120713\_002.mgf.mascot

Click mouse within plot area to zoom in by factor of two about that point

Or, Plot from  to  Da

Label all possible matches  Label matches used for scoring

View spectrum in original style  View spectrum with detailed annotation

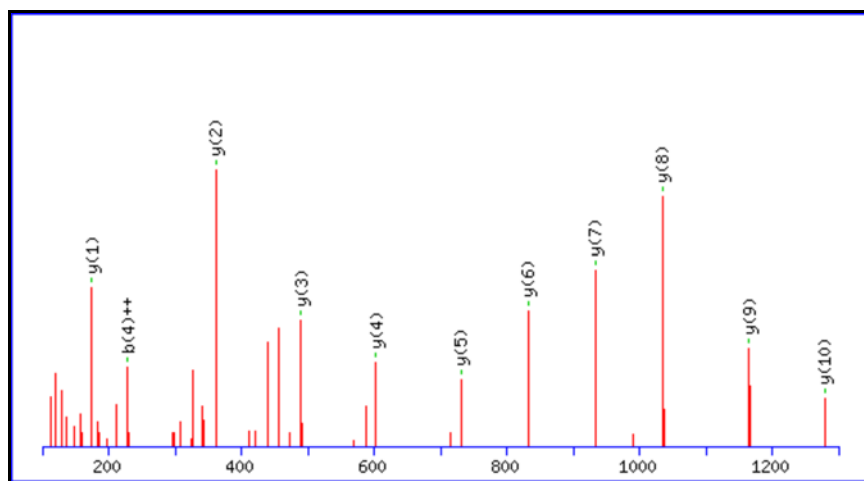

Monoisotopic mass of neutral peptide **Mr(calc):** 1620.7202

**Fixed modifications:** Carbamidomethyl (C) (apply to specified residues or termini only)

**Variable modifications:**

**N-term :** Acetyl (N-term)

**N3 :** Deamidated (NQ)

**Ions Score:** 110 **Expect:** 3.2e-08

**Matches :** 11/140 fragment ions using 11 most intense peaks ([help](#))

| #  | a         | a <sup>++</sup> | a <sup>*</sup> | a <sup>*++</sup> | b         | b <sup>++</sup> | b <sup>*</sup> | b <sup>*++</sup> | Seq. | y                | y <sup>++</sup> | y <sup>*</sup> | y <sup>*++</sup> | #  |
|----|-----------|-----------------|----------------|------------------|-----------|-----------------|----------------|------------------|------|------------------|-----------------|----------------|------------------|----|
| 1  | 86.0600   | 43.5337         |                |                  | 114.0550  | 57.5311         |                |                  | A    |                  |                 |                |                  | 13 |
| 2  | 200.1030  | 100.5551        | 183.0764       | 92.0418          | 228.0979  | 114.5526        | 211.0713       | 106.0393         | N    | 1508.6798        | 754.8435        | 1491.6533      | 746.3303         | 12 |
| 3  | 315.1299  | 158.0686        | 298.1034       | 149.5553         | 343.1248  | 172.0661        | 326.0983       | 163.5528         | N    | 1394.6369        | 697.8221        | 1377.6103      | 689.3088         | 11 |
| 4  | 429.1728  | 215.0901        | 412.1463       | 206.5768         | 457.1678  | <b>229.0875</b> | 440.1412       | 220.5742         | N    | <b>1279.6099</b> | 640.3086        | 1262.5834      | 631.7953         | 10 |
| 5  | 560.2133  | 280.6103        | 543.1868       | 272.0970         | 588.2082  | 294.6078        | 571.1817       | 286.0945         | M    | <b>1165.5670</b> | 583.2871        | 1148.5405      | 574.7739         | 9  |
| 6  | 661.2610  | 331.1341        | 644.2345       | 322.6209         | 689.2559  | 345.1316        | 672.2294       | 336.6183         | T    | <b>1034.5265</b> | 517.7669        | 1017.5000      | 509.2536         | 8  |
| 7  | 762.3087  | 381.6580        | 745.2821       | 373.1447         | 790.3036  | 395.6554        | 773.2770       | 387.1422         | T    | <b>933.4789</b>  | 467.2431        | 916.4523       | 458.7298         | 7  |
| 8  | 863.3564  | 432.1818        | 846.3298       | 423.6685         | 891.3513  | 446.1793        | 874.3247       | 437.6660         | T    | <b>832.4312</b>  | 416.7192        | 815.4046       | 408.2060         | 6  |
| 9  | 991.4149  | 496.2111        | 974.3884       | 487.6978         | 1019.4099 | 510.2086        | 1002.3833      | 501.6953         | Q    | <b>731.3835</b>  | 366.1954        | 714.3570       | 357.6821         | 5  |
| 10 | 1104.4990 | 552.7531        | 1087.4725      | 544.2399         | 1132.4939 | 566.7506        | 1115.4674      | 558.2373         | I    | <b>603.3249</b>  | 302.1661        | 586.2984       | 293.6528         | 4  |
| 11 | 1233.5416 | 617.2744        | 1216.5150      | 608.7612         | 1261.5365 | 631.2719        | 1244.5100      | 622.7586         | E    | <b>490.2409</b>  | 245.6241        | 473.2143       | 237.1108         | 3  |
| 12 | 1419.6209 | 710.3141        | 1402.5944      | 701.8008         | 1447.6158 | 724.3115        | 1430.5893      | 715.7983         | W    | <b>361.1983</b>  | 181.1028        | 344.1717       | 172.5895         | 2  |
| 13 |           |                 |                |                  |           |                 |                |                  | R    | <b>175.1190</b>  | 88.0631         | 158.0924       | 79.5498          | 1  |



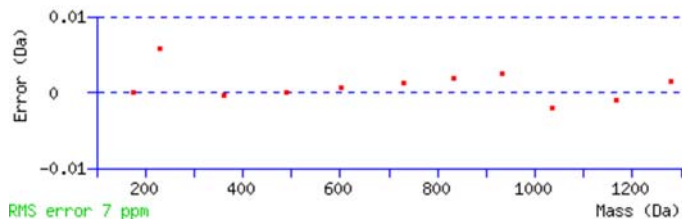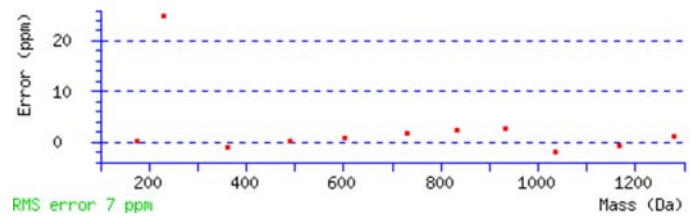

NCBI BLAST search of [ANNNMTTQIEWR](#)

(Parameters: blastp, nr protein database, expect=20000, no filter, PAM30)

Other BLAST [web gateways](#)

**All matches to this query**

| Score | Mr(calc): | Delta   | Sequence                          |
|-------|-----------|---------|-----------------------------------|
| 110.2 | 1620.7202 | 0.0253  | <a href="#">ANNNMTTQIEWR</a>      |
| 110.2 | 1620.7202 | 0.0253  | <a href="#">ANNNMTTQIEWR</a>      |
| 102.8 | 1619.7362 | 1.0093  | <a href="#">ANNNMTTQIEWR</a>      |
| 89.4  | 1620.7202 | 0.0253  | <a href="#">ANNNMTTQIEWR</a>      |
| 74.7  | 1620.7202 | 0.0253  | <a href="#">ANNNMTTQIEWR</a>      |
| 21.0  | 1618.7603 | 1.9851  | <a href="#">SLGINPPSQIDLSR</a>    |
| 17.1  | 1619.7288 | 1.0166  | <a href="#">ALNDNDFGQGRTGGR</a>   |
| 16.5  | 1620.7575 | -0.0120 | <a href="#">MGGAMIGVFAGGMGAPR</a> |
| 16.1  | 1620.7436 | 0.0018  | <a href="#">GFLSYLEEIQSVR</a>     |
| 15.8  | 1620.7144 | 0.0310  | <a href="#">EGNLGSPNASVLGER</a>   |

Mascot: <http://www.matrixscience.com/>

# Mascot Search Results

## Peptide View

MS/MS Fragmentation of **ANNM<sup>+</sup>TTTQIEVGP<sup>+</sup>GATNATINFEAGILECYER**  
 Found in **NS1**, B/Brisbane/60/2008

Match to Query 10173: 3643.688172 from(1215.570000,3+) intensity(2188102.5000)  
 Title: D120713\_002.15838.15838.3  
 Data file D120713\_002.mgf.mascot

Click mouse within plot area to zoom in by factor of two about that point

Or, Plot from  to  Da

Label all possible matches  Label matches used for scoring

View spectrum in original style  View spectrum with detailed annotation

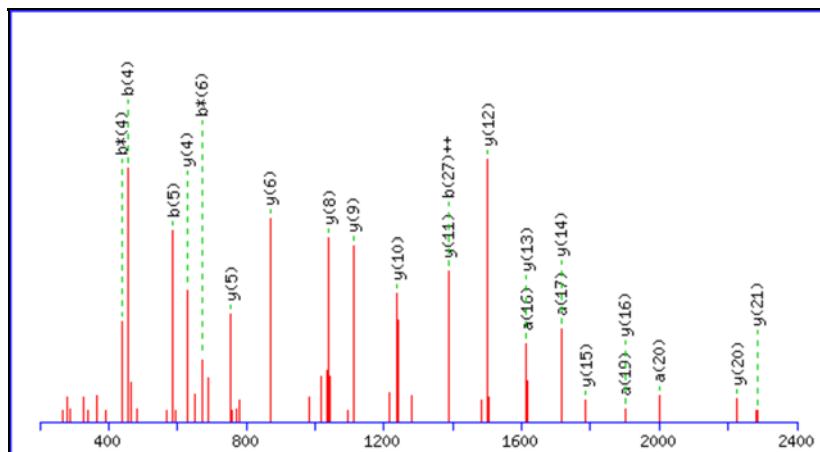

**Monoisotopic mass of neutral peptide Mr(calc):** 3641.6613

**Fixed modifications:** Carbamidomethyl (C) (apply to specified residues or termini only)

**Variable modifications:**

**N-term :** Acetyl (N-term)

**N22 :** Deamidated (NQ)

**Ions Score:** 87 **Expect:** 8.2e-07

**Matches :** 23/380 fragment ions using 36 most intense peaks ([help](#))

| #  | a                | a <sup>++</sup> | a <sup>*</sup> | a <sup>*++</sup> | b               | b <sup>++</sup> | b <sup>*</sup>  | b <sup>*++</sup> | Seq. | y                | y <sup>++</sup> | y <sup>*</sup> | y <sup>*++</sup> | #  |
|----|------------------|-----------------|----------------|------------------|-----------------|-----------------|-----------------|------------------|------|------------------|-----------------|----------------|------------------|----|
| 1  | 86.0600          | 43.5337         |                |                  | 114.0550        | 57.5311         |                 |                  | A    |                  |                 |                |                  | 33 |
| 2  | 200.1030         | 100.5551        | 183.0764       | 92.0418          | 228.0979        | 114.5526        | 211.0713        | 106.0393         | N    | 3529.6210        | 1765.3141       | 3512.5944      | 1756.8009        | 32 |
| 3  | 314.1459         | 157.5766        | 297.1193       | 149.0633         | 342.1408        | 171.5740        | 325.1143        | 163.0608         | N    | 3415.5781        | 1708.2927       | 3398.5515      | 1699.7794        | 31 |
| 4  | 428.1888         | 214.5980        | 411.1623       | 206.0848         | <b>456.1837</b> | 228.5955        | <b>439.1572</b> | 220.0822         | N    | 3301.5351        | 1651.2712       | 3284.5086      | 1642.7579        | 30 |
| 5  | 559.2293         | 280.1183        | 542.2028       | 271.6050         | <b>587.2242</b> | 294.1157        | 570.1977        | 285.6025         | M    | 3187.4922        | 1594.2497       | 3170.4657      | 1585.7365        | 29 |
| 6  | 660.2770         | 330.6421        | 643.2504       | 322.1289         | 688.2719        | 344.6396        | <b>671.2454</b> | 336.1263         | T    | 3056.4517        | 1528.7295       | 3039.4252      | 1520.2162        | 28 |
| 7  | 761.3247         | 381.1660        | 744.2981       | 372.6527         | 789.3196        | 395.1634        | 772.2930        | 386.6502         | T    | 2955.4040        | 1478.2057       | 2938.3775      | 1469.6924        | 27 |
| 8  | 862.3723         | 431.6898        | 845.3458       | 423.1765         | 890.3673        | 445.6873        | 873.3407        | 437.1740         | T    | 2854.3564        | 1427.6818       | 2837.3298      | 1419.1685        | 26 |
| 9  | 990.4309         | 495.7191        | 973.4044       | 487.2058         | 1018.4258       | 509.7166        | 1001.3993       | 501.2033         | Q    | 2753.3087        | 1377.1580       | 2736.2821      | 1368.6447        | 25 |
| 10 | 1103.5150        | 552.2611        | 1086.4884      | 543.7479         | 1131.5099       | 566.2586        | 1114.4834       | 557.7453         | I    | 2625.2501        | 1313.1287       | 2608.2236      | 1304.6154        | 24 |
| 11 | 1232.5576        | 616.7824        | 1215.5310      | 608.2692         | 1260.5525       | 630.7799        | 1243.5259       | 622.2666         | E    | 2512.1660        | 1256.5867       | 2495.1395      | 1248.0734        | 23 |
| 12 | 1331.6260        | 666.3166        | 1314.5994      | 657.8034         | 1359.6209       | 680.3141        | 1342.5944       | 671.8008         | V    | 2383.1235        | 1192.0654       | 2366.0969      | 1183.5521        | 22 |
| 13 | 1388.6475        | 694.8274        | 1371.6209      | 686.3141         | 1416.6424       | 708.8248        | 1399.6158       | 700.3115         | G    | <b>2284.0550</b> | 1142.5312       | 2267.0285      | 1134.0179        | 21 |
| 14 | 1485.7002        | 743.3537        | 1468.6737      | 734.8405         | 1513.6951       | 757.3512        | 1496.6686       | 748.8379         | P    | <b>2227.0336</b> | 1114.0204       | 2210.0070      | 1105.5072        | 20 |
| 15 | 1542.7217        | 771.8645        | 1525.6951      | 763.3512         | 1570.7166       | 785.8619        | 1553.6901       | 777.3487         | G    | 2129.9808        | 1065.4940       | 2112.9543      | 1056.9808        | 19 |
| 16 | <b>1613.7588</b> | 807.3830        | 1596.7322      | 798.8698         | 1641.7537       | 821.3805        | 1624.7272       | 812.8672         | A    | 2072.9593        | 1036.9833       | 2055.9328      | 1028.4700        | 18 |
| 17 | <b>1714.8065</b> | 857.9069        | 1697.7799      | 849.3936         | 1742.8014       | 871.9043        | 1725.7748       | 863.3911         | T    | 2001.9222        | 1001.4648       | 1984.8957      | 992.9515         | 17 |
| 18 | 1828.8494        | 914.9283        | 1811.8229      | 906.4151         | 1856.8443       | 928.9258        | 1839.8178       | 920.4125         | N    | <b>1900.8746</b> | 950.9409        | 1883.8480      | 942.4276         | 16 |
| 19 | <b>1899.8865</b> | 950.4469        | 1882.8600      | 941.9336         | 1927.8814       | 964.4444        | 1910.8549       | 955.9311         | A    | <b>1786.8316</b> | 893.9195        | 1769.8051      | 885.4062         | 15 |
| 20 | <b>2000.9342</b> | 1000.9707       | 1983.9076      | 992.4575         | 2028.9291       | 1014.9682       | 2011.9026       | 1006.4549        | T    | <b>1715.7945</b> | 858.4009        | 1698.7680      | 849.8876         | 14 |

|    |           |           |           |           |           |                  |           |           |          |                  |          |           |          |           |
|----|-----------|-----------|-----------|-----------|-----------|------------------|-----------|-----------|----------|------------------|----------|-----------|----------|-----------|
| 21 | 2114.0183 | 1057.5128 | 2096.9917 | 1048.9995 | 2142.0132 | 1071.5102        | 2124.9866 | 1062.9970 | <b>I</b> | <b>1614.7468</b> | 807.8771 | 1597.7203 | 799.3638 | <b>13</b> |
| 22 | 2229.0452 | 1115.0262 | 2212.0187 | 1106.5130 | 2257.0401 | 1129.0237        | 2240.0136 | 1120.5104 | <b>N</b> | <b>1501.6628</b> | 751.3350 | 1484.6362 | 742.8217 | <b>12</b> |
| 23 | 2376.1136 | 1188.5604 | 2359.0871 | 1180.0472 | 2404.1085 | 1202.5579        | 2387.0820 | 1194.0446 | <b>F</b> | <b>1386.6358</b> | 693.8216 | 1369.6093 | 685.3083 | <b>11</b> |
| 24 | 2505.1562 | 1253.0817 | 2488.1297 | 1244.5685 | 2533.1511 | 1267.0792        | 2516.1246 | 1258.5659 | <b>E</b> | <b>1239.5674</b> | 620.2873 | 1222.5409 | 611.7741 | <b>10</b> |
| 25 | 2576.1933 | 1288.6003 | 2559.1668 | 1280.0870 | 2604.1882 | 1302.5978        | 2587.1617 | 1294.0845 | <b>A</b> | <b>1110.5248</b> | 555.7660 | 1093.4983 | 547.2528 | <b>9</b>  |
| 26 | 2633.2148 | 1317.1110 | 2616.1882 | 1308.5978 | 2661.2097 | 1331.1085        | 2644.1832 | 1322.5952 | <b>G</b> | <b>1039.4877</b> | 520.2475 | 1022.4612 | 511.7342 | <b>8</b>  |
| 27 | 2746.2989 | 1373.6531 | 2729.2723 | 1365.1398 | 2774.2938 | <b>1387.6505</b> | 2757.2672 | 1379.1372 | <b>I</b> | 982.4662         | 491.7368 | 965.4397  | 483.2235 | <b>7</b>  |
| 28 | 2859.3829 | 1430.1951 | 2842.3564 | 1421.6818 | 2887.3778 | 1444.1926        | 2870.3513 | 1435.6793 | <b>L</b> | <b>869.3822</b>  | 435.1947 | 852.3556  | 426.6815 | <b>6</b>  |
| 29 | 2988.4255 | 1494.7164 | 2971.3990 | 1486.2031 | 3016.4204 | 1508.7139        | 2999.3939 | 1500.2006 | <b>E</b> | <b>756.2981</b>  | 378.6527 | 739.2716  | 370.1394 | <b>5</b>  |
| 30 | 3148.4562 | 1574.7317 | 3131.4296 | 1566.2184 | 3176.4511 | 1588.7292        | 3159.4245 | 1580.2159 | <b>C</b> | <b>627.2555</b>  | 314.1314 | 610.2290  | 305.6181 | <b>4</b>  |
| 31 | 3311.5195 | 1656.2634 | 3294.4929 | 1647.7501 | 3339.5144 | 1670.2608        | 3322.4879 | 1661.7476 | <b>Y</b> | 467.2249         | 234.1161 | 450.1983  | 225.6028 | <b>3</b>  |
| 32 | 3440.5621 | 1720.7847 | 3423.5355 | 1712.2714 | 3468.5570 | 1734.7821        | 3451.5304 | 1726.2689 | <b>E</b> | 304.1615         | 152.5844 | 287.1350  | 144.0711 | <b>2</b>  |
| 33 |           |           |           |           |           |                  |           |           | <b>R</b> | 175.1190         | 88.0631  | 158.0924  | 79.5498  | <b>1</b>  |

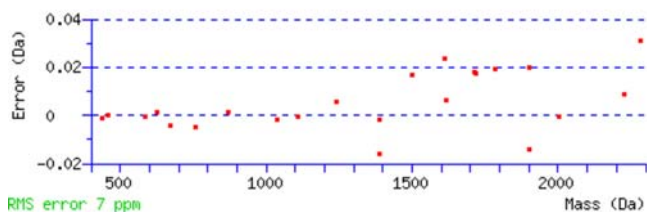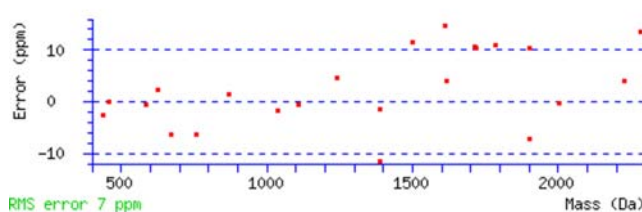

NCBI BLAST search of [ANNNMTTQTQIEVGPATNATINFEAGILECYER](#)

(Parameters: blastp, nr protein database, expect=20000, no filter, PAM30)

Other BLAST [web gateways](#)

**All matches to this query**

| Score | Mr(calc): | Delta  | Sequence                                          |
|-------|-----------|--------|---------------------------------------------------|
| 87.3  | 3641.6613 | 2.0268 | <a href="#">ANNNMTTQTQIEVGPATNATINFEAGILECYER</a> |
| 84.8  | 3641.6613 | 2.0268 | <a href="#">ANNNMTTQTQIEVGPATNATINFEAGILECYER</a> |
| 83.3  | 3641.6613 | 2.0268 | <a href="#">ANNNMTTQTQIEVGPATNATINFEAGILECYER</a> |
| 83.3  | 3642.6454 | 1.0428 | <a href="#">ANNNMTTQTQIEVGPATNATINFEAGILECYER</a> |
| 79.6  | 3642.6454 | 1.0428 | <a href="#">ANNNMTTQTQIEVGPATNATINFEAGILECYER</a> |
| 74.8  | 3642.6454 | 1.0428 | <a href="#">ANNNMTTQTQIEVGPATNATINFEAGILECYER</a> |
| 74.8  | 3643.6294 | 0.0588 | <a href="#">ANNNMTTQTQIEVGPATNATINFEAGILECYER</a> |
| 74.8  | 3642.6454 | 1.0428 | <a href="#">ANNNMTTQTQIEVGPATNATINFEAGILECYER</a> |
| 74.8  | 3642.6454 | 1.0428 | <a href="#">ANNNMTTQTQIEVGPATNATINFEAGILECYER</a> |
| 73.4  | 3641.6613 | 2.0268 | <a href="#">ANNNMTTQTQIEVGPATNATINFEAGILECYER</a> |

Mascot: <http://www.matrixscience.com/>

WSN PB2 740-752 unmodified

### NSSILTDSQTATK

Charge: 2, Exp. m/z: 683.850, Calc. m/z: 683.347  
 Data File: D120711\_007, Scans: 23634 - 23634

Max Intensity: 2.05e+05

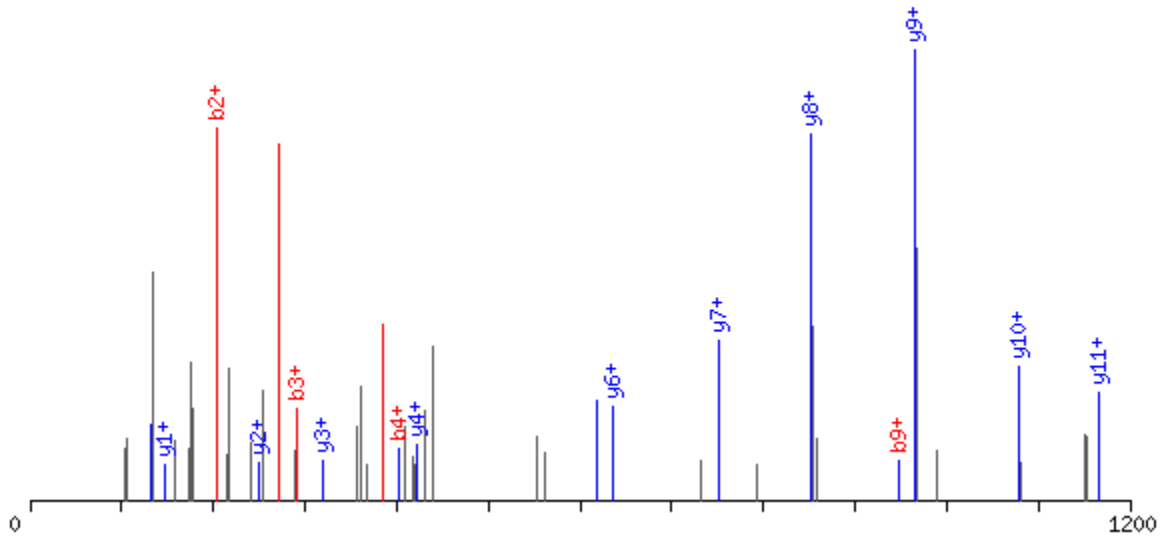

|   |    | b+      | -H2O    | -NH3    | y+      | -H2O    | -NH3    |    |   |
|---|----|---------|---------|---------|---------|---------|---------|----|---|
| N | 1  | 115.05  |         | 98.02   |         |         |         | 13 | N |
| S | 2  | 202.08  | 184.07  | 185.06  | 1251.64 | 1233.63 | 1234.62 | 12 | S |
| S | 3  | 289.11  | 271.10  | 272.09  | 1164.61 | 1146.60 | 1147.58 | 11 | S |
| I | 4  | 402.20  | 384.19  | 385.17  | 1077.58 | 1059.57 | 1060.55 | 10 | I |
| L | 5  | 515.28  | 497.27  | 498.26  | 964.49  | 946.48  | 947.47  | 9  | L |
| T | 6  | 616.33  | 598.32  | 599.30  | 851.41  | 833.40  | 834.38  | 8  | T |
| D | 7  | 731.36  | 713.35  | 714.33  | 750.36  | 732.35  | 733.34  | 7  | D |
| S | 8  | 818.39  | 800.38  | 801.36  | 635.34  | 617.33  | 618.31  | 6  | S |
| Q | 9  | 946.45  | 928.44  | 929.42  | 548.30  | 530.29  | 531.28  | 5  | Q |
| T | 10 | 1047.50 | 1029.48 | 1030.47 | 420.25  | 402.23  | 403.22  | 4  | T |
| A | 11 | 1118.53 | 1100.52 | 1101.51 | 319.20  | 301.19  | 302.17  | 3  | A |
| T | 12 | 1219.58 | 1201.57 | 1202.55 | 248.16  | 230.15  | 231.13  | 2  | T |
| K | 13 |         |         |         | 147.11  |         | 130.09  | 1  | K |

WSN PB2 740-752 phospho

## NSS(+79.97)ILTDSQTATK

Charge: 2, Exp. m/z: 723.329, Calc. m/z: 723.332

Data File: D120711\_007, Scans: 15996 - 15996

Max Intensity: 1.78e+05

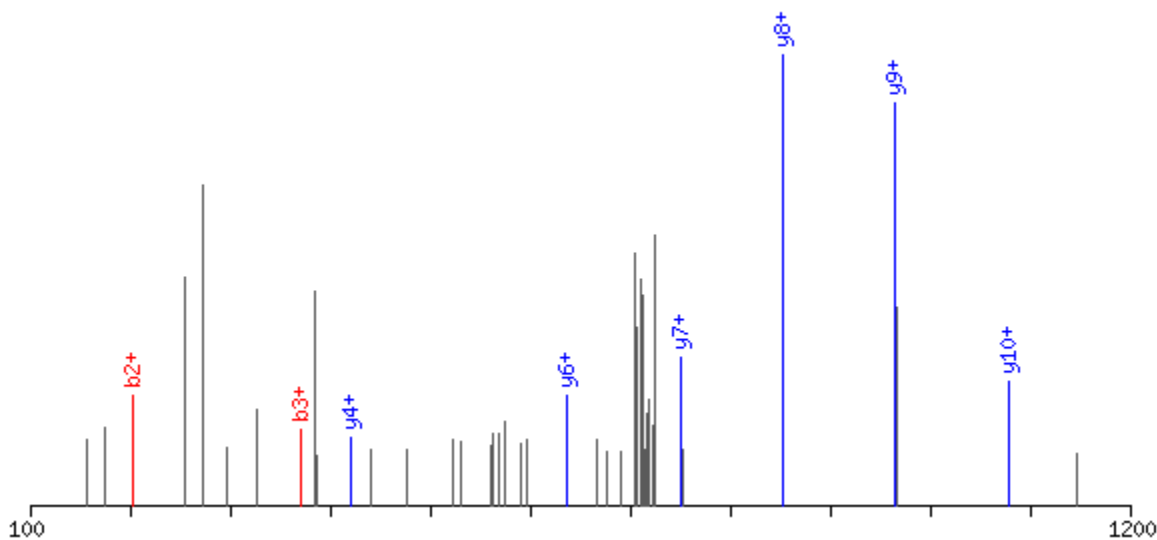

|          |    | b+      | -H2O    | -NH3    | y+      | -H2O    | -NH3    |    |          |
|----------|----|---------|---------|---------|---------|---------|---------|----|----------|
| N        | 1  | 115.05  |         | 98.02   |         |         |         | 13 | N        |
| S        | 2  | 202.08  | 184.07  | 185.06  | 1331.61 | 1313.60 | 1314.58 | 12 | S        |
| <u>S</u> | 3  | 369.08  | 351.07  | 352.05  | 1244.58 | 1226.57 | 1227.55 | 11 | <u>S</u> |
| I        | 4  | 482.16  | 464.15  | 465.14  | 1077.58 | 1059.57 | 1060.55 | 10 | I        |
| L        | 5  | 595.25  | 577.24  | 578.22  | 964.49  | 946.48  | 947.47  | 9  | L        |
| T        | 6  | 696.30  | 678.29  | 679.27  | 851.41  | 833.40  | 834.38  | 8  | T        |
| D        | 7  | 811.32  | 793.31  | 794.30  | 750.36  | 732.35  | 733.34  | 7  | D        |
| S        | 8  | 898.36  | 880.34  | 881.33  | 635.34  | 617.33  | 618.31  | 6  | S        |
| Q        | 9  | 1026.41 | 1008.40 | 1009.39 | 548.30  | 530.29  | 531.28  | 5  | Q        |
| T        | 10 | 1127.46 | 1109.45 | 1110.44 | 420.25  | 402.23  | 403.22  | 4  | T        |
| A        | 11 | 1198.50 | 1180.49 | 1181.47 | 319.20  | 301.19  | 302.17  | 3  | A        |
| T        | 12 | 1299.55 | 1281.54 | 1282.52 | 248.16  | 230.15  | 231.13  | 2  | T        |
| K        | 13 |         |         |         | 147.11  |         | 130.09  | 1  | K        |

WSN PB1 221-229 M227ox

### ALTLNTM(+15.99)TK

Charge: 2, Exp. m/z: 504.773, Calc. m/z: 504.777  
 Data File: B110620\_019, Scans: 440 - 440

Max Intensity: 4.75e+03

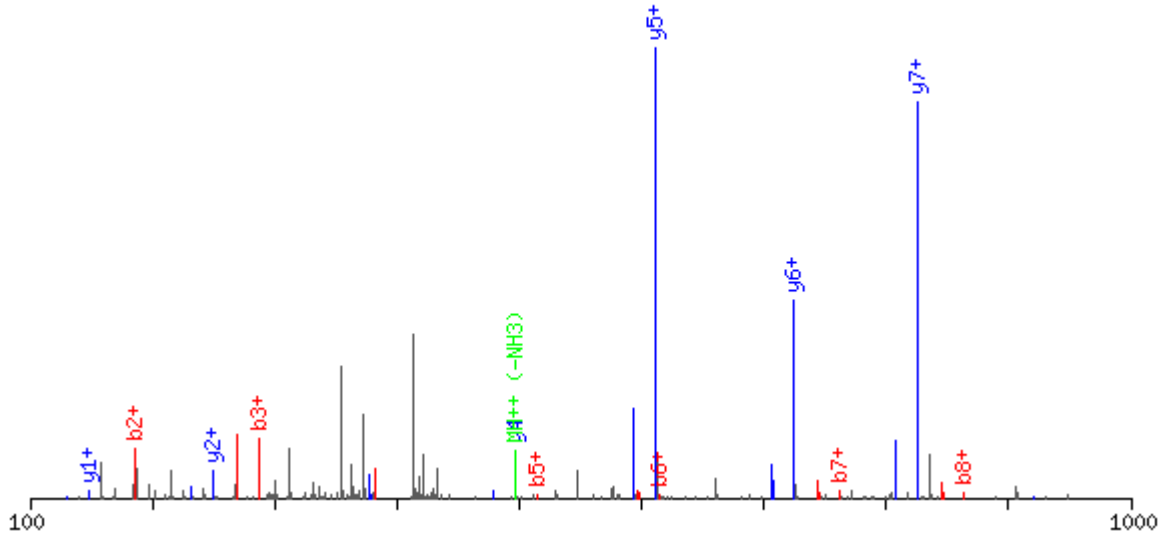

|          |   | b+     | -H2O   | -NH3   | y+     | -H2O   | -NH3   |   |          |
|----------|---|--------|--------|--------|--------|--------|--------|---|----------|
| A        | 1 | 72.04  |        |        |        |        |        | 9 | A        |
| L        | 2 | 185.13 |        |        | 937.50 | 919.49 | 920.48 | 8 | L        |
| T        | 3 | 286.18 | 268.17 |        | 824.42 | 806.41 | 807.39 | 7 | T        |
| L        | 4 | 399.26 | 381.25 |        | 723.37 | 705.36 | 706.34 | 6 | L        |
| N        | 5 | 513.30 | 495.29 | 496.28 | 610.29 | 592.28 | 593.26 | 5 | N        |
| T        | 6 | 614.35 | 596.34 | 597.32 | 496.24 | 478.23 | 479.22 | 4 | T        |
| <u>M</u> | 7 | 761.39 | 743.38 | 744.36 | 395.20 | 377.19 | 378.17 | 3 | <u>M</u> |
| T        | 8 | 862.43 | 844.42 | 845.41 | 248.16 | 230.15 | 231.13 | 2 | T        |
| K        | 9 |        |        |        | 147.11 |        | 130.09 | 1 | K        |

WSN PB1 221-229 unmodified

### ALTLNTMTK

Charge: 2, Exp. m/z: 496.776, Calc. m/z: 496.780

Data File: B110620\_019, Scans: 536 - 536

Max Intensity: 4.38e+03

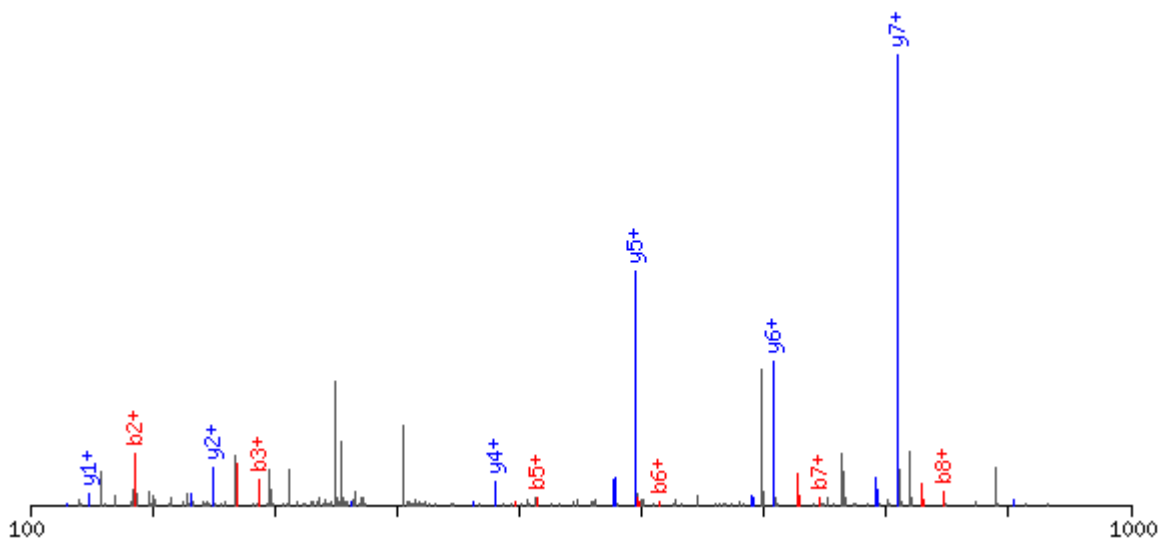

|   |   | b+     | -H2O   | -NH3   | y+     | -H2O   | -NH3   |   |   |
|---|---|--------|--------|--------|--------|--------|--------|---|---|
| A | 1 | 72.04  |        |        |        |        |        | 9 | A |
| L | 2 | 185.13 |        |        | 921.51 | 903.50 | 904.48 | 8 | L |
| T | 3 | 286.18 | 268.17 |        | 808.42 | 790.41 | 791.40 | 7 | T |
| L | 4 | 399.26 | 381.25 |        | 707.38 | 689.37 | 690.35 | 6 | L |
| N | 5 | 513.30 | 495.29 | 496.28 | 594.29 | 576.28 | 577.27 | 5 | N |
| T | 6 | 614.35 | 596.34 | 597.32 | 480.25 | 462.24 | 463.22 | 4 | T |
| M | 7 | 745.39 | 727.38 | 728.36 | 379.20 | 361.19 | 362.17 | 3 | M |
| T | 8 | 846.44 | 828.43 | 829.41 | 248.16 | 230.15 | 231.13 | 2 | T |
| K | 9 |        |        |        | 147.11 |        | 130.09 | 1 | K |



WSN PB1 221-229 phospho M227ox

ALT(+79.97)LNTM(+15.99)TK

Charge: 2, Exp. m/z: 544.756, Calc. m/z: 544.757  
 Data File: B110620\_015, Scans: 539 - 539

Max Intensity: 1.19e+02

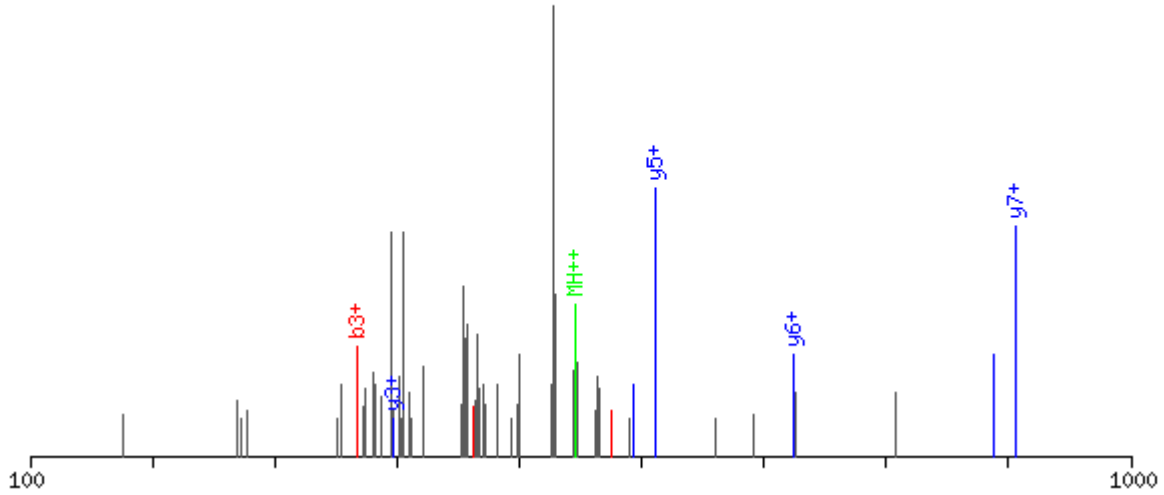

|          |   | b+     | -H2O   | -NH3   | y+      | -H2O   | -NH3    |   |          |
|----------|---|--------|--------|--------|---------|--------|---------|---|----------|
| A        | 1 | 72.04  |        |        |         |        |         | 9 | A        |
| L        | 2 | 185.13 |        |        | 1017.47 | 999.46 | 1000.44 | 8 | L        |
| <u>I</u> | 3 | 366.14 | 348.13 |        | 904.38  | 886.37 | 887.36  | 7 | <u>I</u> |
| L        | 4 | 479.23 | 461.22 |        | 723.37  | 705.36 | 706.34  | 6 | L        |
| N        | 5 | 593.27 | 575.26 | 576.24 | 610.29  | 592.28 | 593.26  | 5 | N        |
| T        | 6 | 694.32 | 676.31 | 677.29 | 496.24  | 478.23 | 479.22  | 4 | T        |
| <u>M</u> | 7 | 841.35 | 823.34 | 824.33 | 395.20  | 377.19 | 378.17  | 3 | <u>M</u> |
| T        | 8 | 942.40 | 924.39 | 925.37 | 248.16  | 230.15 | 231.13  | 2 | T        |
| K        | 9 |        |        |        | 147.11  |        | 130.09  | 1 | K        |

WSN PA 214-230 unmodified

## LADQSLPPNFSSLENFR

Charge: 3, Exp. m/z: 645.658, Calc. m/z: 645.657

Data File: D120711\_007, Scans: 26474 - 26474

Max Intensity: 2.11e+05

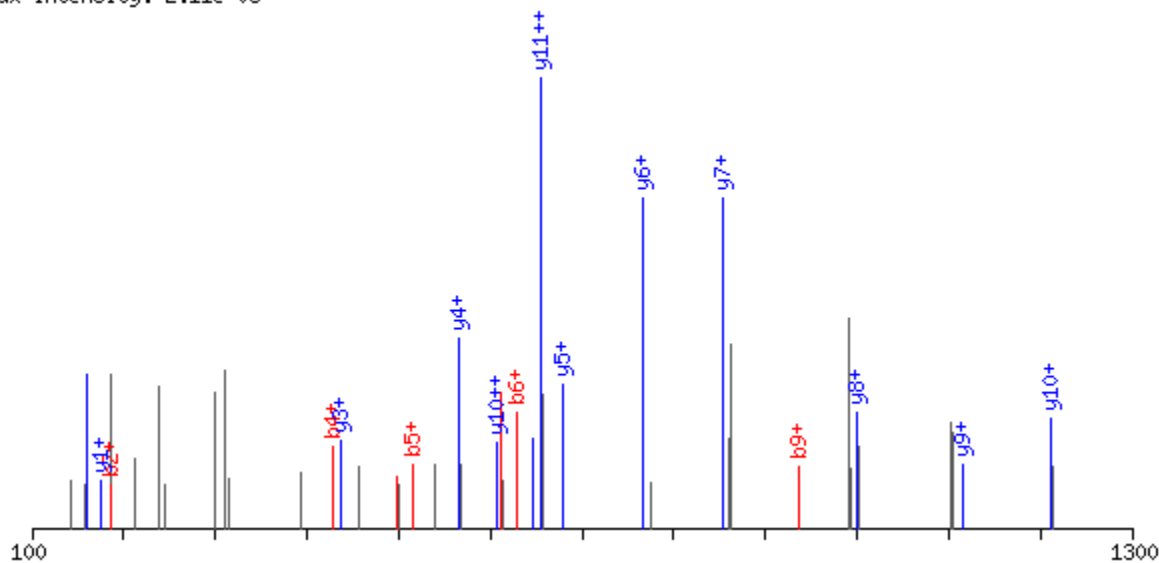[Hiding fragment losses - Click to Show](#)

|   |    | b+      | b++    | y+      | y++    |    |   |
|---|----|---------|--------|---------|--------|----|---|
| L | 1  | 114.09  | 57.55  |         |        | 17 | L |
| A | 2  | 185.13  | 93.07  | 1821.88 | 911.44 | 16 | A |
| D | 3  | 300.16  | 150.58 | 1750.84 | 875.92 | 15 | D |
| Q | 4  | 428.21  | 214.61 | 1635.81 | 818.41 | 14 | Q |
| S | 5  | 515.25  | 258.13 | 1507.75 | 754.38 | 13 | S |
| L | 6  | 628.33  | 314.67 | 1420.72 | 710.86 | 12 | L |
| P | 7  | 725.38  | 363.20 | 1307.64 | 654.32 | 11 | P |
| P | 8  | 822.44  | 411.72 | 1210.59 | 605.80 | 10 | P |
| N | 9  | 936.48  | 468.74 | 1113.53 | 557.27 | 9  | N |
| F | 10 | 1083.55 | 542.28 | 999.49  | 500.25 | 8  | F |
| S | 11 | 1170.58 | 585.79 | 852.42  | 426.71 | 7  | S |
| S | 12 | 1257.61 | 629.31 | 765.39  | 383.20 | 6  | S |
| L | 13 | 1370.70 | 685.85 | 678.36  | 339.68 | 5  | L |
| E | 14 | 1499.74 | 750.37 | 565.27  | 283.14 | 4  | E |
| N | 15 | 1613.78 | 807.39 | 436.23  | 218.62 | 3  | N |
| F | 16 | 1760.85 | 880.93 | 322.19  | 161.60 | 2  | F |
| R | 17 |         |        | 175.12  | 88.06  | 1  | R |

WSN PA 214-230 phospho + deamidated

## LADQSLPPN(+0.98)FSS(+79.97)LENFR

Charge: 2, Exp. m/z: 1008.460, Calc. m/z: 1008.457

Data File: B120705\_010, Scans: 928 - 928

Max Intensity: 4.01e+02

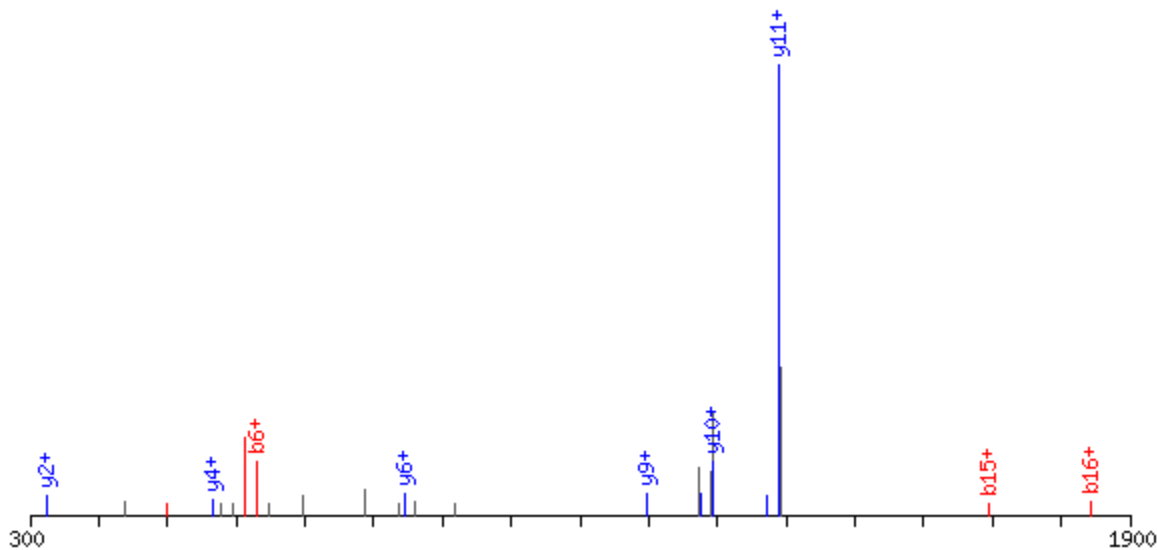

|          |    | b+      | -H2O    | -NH3    | y+      | -H2O    | -NH3    |    |          |
|----------|----|---------|---------|---------|---------|---------|---------|----|----------|
| L        | 1  | 114.09  |         |         |         |         |         | 17 | L        |
| A        | 2  | 185.13  |         |         | 1902.83 | 1884.82 | 1885.80 | 16 | A        |
| D        | 3  | 300.16  | 282.14  |         | 1831.79 | 1813.78 | 1814.76 | 15 | D        |
| Q        | 4  | 428.21  | 410.20  |         | 1716.76 | 1698.75 | 1699.74 | 14 | Q        |
| S        | 5  | 515.25  | 497.24  |         | 1588.70 | 1570.69 | 1571.68 | 13 | S        |
| L        | 6  | 628.33  | 610.32  |         | 1501.67 | 1483.66 | 1484.65 | 12 | L        |
| P        | 7  | 725.38  | 707.37  |         | 1388.59 | 1370.58 | 1371.56 | 11 | P        |
| P        | 8  | 822.44  | 804.43  |         | 1291.54 | 1273.52 | 1274.51 | 10 | P        |
| <u>N</u> | 9  | 937.46  | 919.45  | 920.44  | 1194.48 | 1176.47 | 1177.46 | 9  | <u>N</u> |
| F        | 10 | 1084.53 | 1066.52 | 1067.50 | 1079.46 | 1061.45 | 1062.43 | 8  | F        |
| S        | 11 | 1171.56 | 1153.55 | 1154.54 | 932.39  | 914.38  | 915.36  | 7  | S        |
| <u>S</u> | 12 | 1338.56 | 1320.55 | 1321.53 | 845.36  | 827.34  | 828.33  | 6  | <u>S</u> |
| L        | 13 | 1451.65 | 1433.63 | 1434.62 | 678.36  | 660.35  | 661.33  | 5  | L        |
| E        | 14 | 1580.69 | 1562.68 | 1563.66 | 565.27  | 547.26  | 548.25  | 4  | E        |
| N        | 15 | 1694.73 | 1676.72 | 1677.70 | 436.23  |         | 419.20  | 3  | N        |
| F        | 16 | 1841.80 | 1823.79 | 1824.77 | 322.19  |         | 305.16  | 2  | F        |
| R        | 17 |         |         |         | 175.12  |         | 158.09  | 1  | R        |

WSN HA 344-382 unmodified

## GLFGAIAGFIEGGWTGMIDGWYGYHHQNEQSGSYAADQK

Charge: 3, Exp. m/z: 1396.970, Calc. m/z: 1396.967

Data File: B110818\_009, Scans: 1877 - 1877

Max Intensity: 2.29e+02

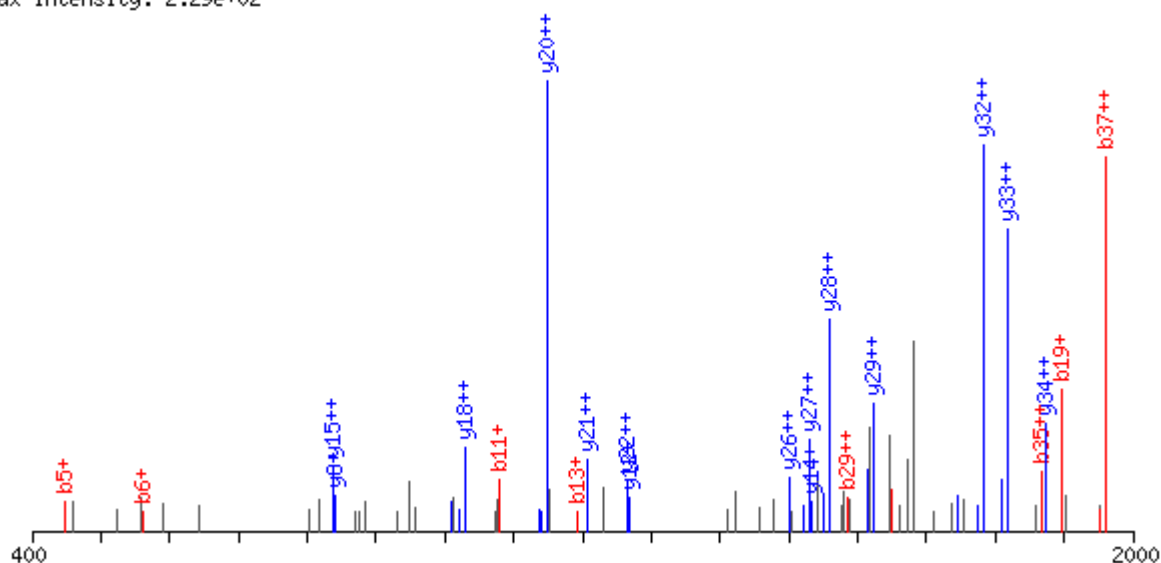

Showing fragment losses - Click to Hide

|   |    | b+      | -H2O    | -NH3 | b++     | -H2O    | -NH3 | y+      | -H2O    | -NH3    | y++     | -H2O    | -NH3    |    |   |
|---|----|---------|---------|------|---------|---------|------|---------|---------|---------|---------|---------|---------|----|---|
| G | 1  | 58.03   |         |      | 29.52   |         |      |         |         |         |         |         |         | 39 | G |
| L | 2  | 171.11  |         |      | 86.06   |         |      | 4131.87 | 4113.86 | 4114.85 | 2066.44 | 2057.43 | 2057.93 | 38 | L |
| F | 3  | 318.18  |         |      | 159.59  |         |      | 4018.79 | 4000.78 | 4001.76 | 2009.90 | 2000.89 | 2001.38 | 37 | F |
| G | 4  | 375.20  |         |      | 188.10  |         |      | 3871.72 | 3853.71 | 3854.69 | 1936.36 | 1927.36 | 1927.85 | 36 | G |
| A | 5  | 446.24  |         |      | 223.62  |         |      | 3814.70 | 3796.69 | 3797.67 | 1907.85 | 1898.85 | 1899.34 | 35 | A |
| I | 6  | 559.32  |         |      | 280.17  |         |      | 3743.66 | 3725.65 | 3726.63 | 1872.33 | 1863.33 | 1863.82 | 34 | I |
| A | 7  | 630.36  |         |      | 315.68  |         |      | 3630.58 | 3612.57 | 3613.55 | 1815.79 | 1806.79 | 1807.28 | 33 | A |
| G | 8  | 687.38  |         |      | 344.19  |         |      | 3559.54 | 3541.53 | 3542.51 | 1780.27 | 1771.27 | 1771.76 | 32 | G |
| F | 9  | 834.45  |         |      | 417.73  |         |      | 3502.52 | 3484.51 | 3485.49 | 1751.76 | 1742.76 | 1743.25 | 31 | F |
| I | 10 | 947.53  |         |      | 474.27  |         |      | 3355.45 | 3337.44 | 3338.42 | 1678.23 | 1669.22 | 1669.72 | 30 | I |
| E | 11 | 1076.58 | 1058.57 |      | 538.79  | 529.79  |      | 3242.37 | 3224.36 | 3225.34 | 1621.69 | 1612.68 | 1613.17 | 29 | E |
| G | 12 | 1133.60 | 1115.59 |      | 567.30  | 558.30  |      | 3113.32 | 3095.31 | 3096.30 | 1557.17 | 1548.16 | 1548.65 | 28 | G |
| G | 13 | 1190.62 | 1172.61 |      | 595.81  | 586.81  |      | 3056.30 | 3038.29 | 3039.28 | 1528.65 | 1519.65 | 1520.14 | 27 | G |
| W | 14 | 1376.70 | 1358.69 |      | 688.85  | 679.85  |      | 2999.28 | 2981.27 | 2982.25 | 1500.14 | 1491.14 | 1491.63 | 26 | W |
| T | 15 | 1477.75 | 1459.74 |      | 739.38  | 730.37  |      | 2813.20 | 2795.19 | 2796.17 | 1407.10 | 1398.10 | 1398.59 | 25 | T |
| G | 16 | 1534.77 | 1516.76 |      | 767.89  | 758.88  |      | 2712.15 | 2694.14 | 2695.13 | 1356.58 | 1347.57 | 1348.07 | 24 | G |
| M | 17 | 1665.81 | 1647.80 |      | 833.41  | 824.40  |      | 2655.13 | 2637.12 | 2638.11 | 1328.07 | 1319.06 | 1319.56 | 23 | M |
| I | 18 | 1778.89 | 1760.88 |      | 889.95  | 880.95  |      | 2524.09 | 2506.08 | 2507.06 | 1262.55 | 1253.54 | 1254.04 | 22 | I |
| D | 19 | 1893.92 | 1875.91 |      | 947.46  | 938.46  |      | 2411.01 | 2393.00 | 2393.98 | 1206.01 | 1197.00 | 1197.49 | 21 | D |
| G | 20 | 1950.94 | 1932.93 |      | 975.97  | 966.97  |      | 2295.98 | 2277.97 | 2278.95 | 1148.49 | 1139.49 | 1139.98 | 20 | G |
| W | 21 | 2137.02 | 2119.01 |      | 1069.01 | 1060.01 |      | 2238.96 | 2220.95 | 2221.93 | 1119.98 | 1110.98 | 1111.47 | 19 | W |
| Y | 22 | 2300.08 | 2282.07 |      | 1150.55 | 1141.54 |      | 2052.88 | 2034.87 | 2035.85 | 1026.94 | 1017.94 | 1018.43 | 18 | Y |
| G | 23 | 2357.11 | 2339.10 |      | 1179.06 | 1170.05 |      | 1889.82 | 1871.81 | 1872.79 | 945.41  | 936.41  | 936.90  | 17 | G |
| Y | 24 | 2520.17 | 2502.16 |      | 1260.59 | 1251.58 |      | 1832.79 | 1814.78 | 1815.77 | 916.90  | 907.90  | 908.39  | 16 | Y |
| H | 25 | 2657.23 | 2639.22 |      | 1329.12 | 1320.11 |      | 1669.73 | 1651.72 | 1652.70 | 835.37  | 826.36  | 826.86  | 15 | H |
| H | 26 | 2794.29 | 2776.28 |      | 1397.65 | 1388.64 |      | 1532.67 | 1514.66 | 1515.65 | 766.84  | 757.83  | 758.33  | 14 | H |
| Q | 27 | 2922.35 | 2904.34 |      | 1461.68 | 1452.67 |      | 1395.61 | 1377.60 | 1378.59 | 698.31  | 689.31  | 689.80  | 13 | Q |

|   |    | b+      | -H2O    | -NH3    | b++     | -H2O    | -NH3    | y+      | -H2O    | -NH3    | y++    | -H2O   | -NH3   |    |   |
|---|----|---------|---------|---------|---------|---------|---------|---------|---------|---------|--------|--------|--------|----|---|
| N | 28 | 3036.39 | 3018.38 | 3019.36 | 1518.70 | 1509.69 | 1510.18 | 1267.55 | 1249.54 | 1250.53 | 634.28 | 625.28 | 625.77 | 12 | N |
| E | 29 | 3165.43 | 3147.42 | 3148.40 | 1583.22 | 1574.21 | 1574.71 | 1153.51 | 1135.50 | 1136.49 | 577.26 | 568.25 | 568.75 | 11 | E |
| Q | 30 | 3293.49 | 3275.48 | 3276.46 | 1647.25 | 1638.24 | 1638.74 | 1024.47 | 1006.46 | 1007.44 | 512.74 | 503.73 | 504.23 | 10 | Q |
| G | 31 | 3350.51 | 3332.50 | 3333.48 | 1675.76 | 1666.75 | 1667.25 | 896.41  | 878.40  | 879.38  | 448.71 | 439.70 | 440.20 | 9  | G |
| S | 32 | 3437.54 | 3419.53 | 3420.52 | 1719.28 | 1710.27 | 1710.76 | 839.39  | 821.38  | 822.36  | 420.20 | 411.19 | 411.69 | 8  | S |
| G | 33 | 3494.56 | 3476.55 | 3477.54 | 1747.79 | 1738.78 | 1739.27 | 752.36  | 734.35  | 735.33  | 376.68 | 367.68 | 368.17 | 7  | G |
| Y | 34 | 3657.63 | 3639.62 | 3640.60 | 1829.32 | 1820.31 | 1820.80 | 695.34  | 677.33  | 678.31  | 348.17 | 339.17 | 339.66 | 6  | Y |
| A | 35 | 3728.67 | 3710.65 | 3711.64 | 1864.84 | 1855.83 | 1856.32 | 532.27  | 514.26  | 515.25  | 266.64 | 257.63 | 258.13 | 5  | A |
| A | 36 | 3799.70 | 3781.69 | 3782.68 | 1900.35 | 1891.35 | 1891.84 | 461.24  | 443.22  | 444.21  | 231.12 | 222.12 | 222.61 | 4  | A |
| D | 37 | 3914.73 | 3896.72 | 3897.70 | 1957.87 | 1948.86 | 1949.35 | 390.20  | 372.19  | 373.17  | 195.60 | 186.60 | 187.09 | 3  | D |
| Q | 38 | 4042.79 | 4024.78 | 4025.76 | 2021.90 | 2012.89 | 2013.38 | 275.17  |         | 258.14  | 138.09 |        | 129.58 | 2  | Q |
| K | 39 |         |         |         |         |         |         | 147.11  |         | 130.09  | 74.06  |        | 65.55  | 1  | K |

## WSN HA 344-382 phospho

## GLFGAIAGFIEGGWT(+79.97)GMIDGWYGYHHQNEQSGGYAADQK

Charge: 3, Exp. m/z: 1423.630, Calc. m/z: 1423.624

Data File: B110818\_004, Scans: 1377 - 1377

Max Intensity: 4.24e+02

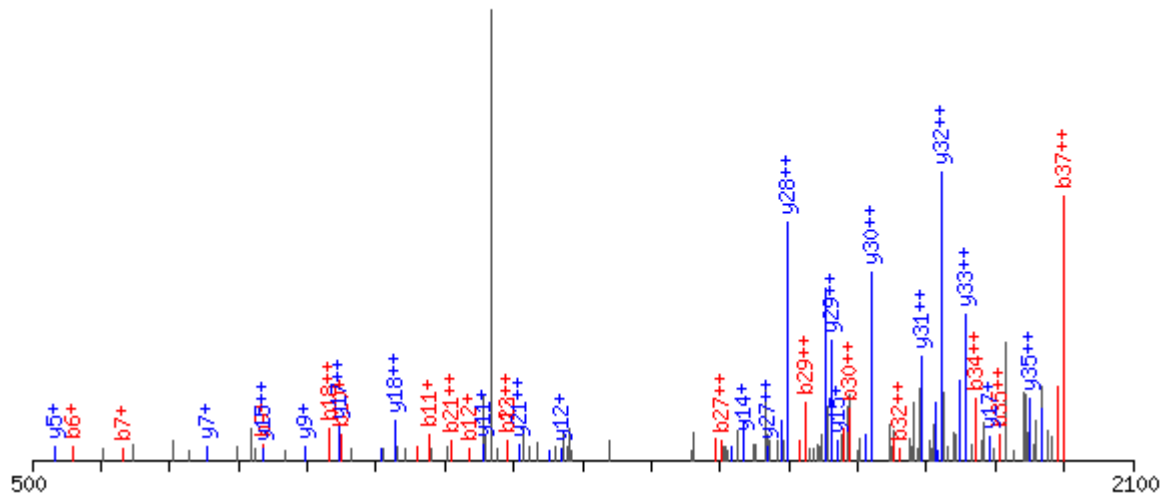

Showing fragment losses - Click to Hide

|   |    | b+      | -H2O    | -NH3 | b++     | -H2O    | -NH3 | y+      | -H2O    | -NH3    | y++     | -H2O    | -NH3    |    |   |
|---|----|---------|---------|------|---------|---------|------|---------|---------|---------|---------|---------|---------|----|---|
| G | 1  | 58.03   |         |      | 29.52   |         |      |         |         |         |         |         |         | 39 | G |
| L | 2  | 171.11  |         |      | 86.06   |         |      | 4211.84 | 4193.83 | 4194.81 | 2106.42 | 2097.42 | 2097.91 | 38 | L |
| F | 3  | 318.18  |         |      | 159.59  |         |      | 4098.75 | 4080.74 | 4081.73 | 2049.88 | 2040.88 | 2041.37 | 37 | F |
| G | 4  | 375.20  |         |      | 188.10  |         |      | 3951.69 | 3933.68 | 3934.66 | 1976.35 | 1967.34 | 1967.83 | 36 | G |
| A | 5  | 446.24  |         |      | 223.62  |         |      | 3894.66 | 3876.65 | 3877.64 | 1947.84 | 1938.83 | 1939.32 | 35 | A |
| I | 6  | 559.32  |         |      | 280.17  |         |      | 3823.63 | 3805.62 | 3806.60 | 1912.32 | 1903.31 | 1903.80 | 34 | I |
| A | 7  | 630.36  |         |      | 315.68  |         |      | 3710.54 | 3692.53 | 3693.52 | 1855.78 | 1846.77 | 1847.26 | 33 | A |
| G | 8  | 687.38  |         |      | 344.19  |         |      | 3639.51 | 3621.50 | 3622.48 | 1820.26 | 1811.25 | 1811.74 | 32 | G |
| F | 9  | 834.45  |         |      | 417.73  |         |      | 3582.48 | 3564.47 | 3565.46 | 1791.75 | 1782.74 | 1783.23 | 31 | F |
| I | 10 | 947.53  |         |      | 474.27  |         |      | 3435.42 | 3417.41 | 3418.39 | 1718.21 | 1709.21 | 1709.70 | 30 | I |
| E | 11 | 1076.58 | 1058.57 |      | 538.79  | 529.79  |      | 3322.33 | 3304.32 | 3305.31 | 1661.67 | 1652.66 | 1653.16 | 29 | E |
| G | 12 | 1133.60 | 1115.59 |      | 567.30  | 558.30  |      | 3193.29 | 3175.28 | 3176.26 | 1597.15 | 1588.14 | 1588.64 | 28 | G |
| G | 13 | 1190.62 | 1172.61 |      | 595.81  | 586.81  |      | 3136.27 | 3118.26 | 3119.24 | 1568.64 | 1559.63 | 1560.12 | 27 | G |
| W | 14 | 1376.70 | 1358.69 |      | 688.85  | 679.85  |      | 3079.25 | 3061.24 | 3062.22 | 1540.13 | 1531.12 | 1531.61 | 26 | W |
| I | 15 | 1557.71 | 1539.70 |      | 779.36  | 770.36  |      | 2893.17 | 2875.16 | 2876.14 | 1447.09 | 1438.08 | 1438.57 | 25 | I |
| G | 16 | 1614.74 | 1596.72 |      | 807.87  | 798.87  |      | 2712.15 | 2694.14 | 2695.13 | 1356.58 | 1347.57 | 1348.07 | 24 | G |
| M | 17 | 1745.78 | 1727.77 |      | 873.39  | 864.39  |      | 2655.13 | 2637.12 | 2638.11 | 1328.07 | 1319.06 | 1319.56 | 23 | M |
| I | 18 | 1858.86 | 1840.85 |      | 929.93  | 920.93  |      | 2524.09 | 2506.08 | 2507.06 | 1262.55 | 1253.54 | 1254.04 | 22 | I |
| D | 19 | 1973.89 | 1955.88 |      | 987.45  | 978.44  |      | 2411.01 | 2393.00 | 2393.98 | 1206.01 | 1197.00 | 1197.49 | 21 | D |
| G | 20 | 2030.91 | 2012.90 |      | 1015.96 | 1006.95 |      | 2295.98 | 2277.97 | 2278.95 | 1148.49 | 1139.49 | 1139.98 | 20 | G |
| W | 21 | 2216.99 | 2198.98 |      | 1109.00 | 1099.99 |      | 2238.96 | 2220.95 | 2221.93 | 1119.98 | 1110.98 | 1111.47 | 19 | W |
| Y | 22 | 2380.05 | 2362.04 |      | 1190.53 | 1181.52 |      | 2052.88 | 2034.87 | 2035.85 | 1026.94 | 1017.94 | 1018.43 | 18 | Y |
| G | 23 | 2437.07 | 2419.06 |      | 1219.04 | 1210.03 |      | 1889.82 | 1871.81 | 1872.79 | 945.41  | 936.41  | 936.90  | 17 | G |
| Y | 24 | 2600.14 | 2582.13 |      | 1300.57 | 1291.57 |      | 1832.79 | 1814.78 | 1815.77 | 916.90  | 907.90  | 908.39  | 16 | Y |
| H | 25 | 2737.19 | 2719.18 |      | 1369.10 | 1360.10 |      | 1669.73 | 1651.72 | 1652.70 | 835.37  | 826.36  | 826.86  | 15 | H |
| H | 26 | 2874.25 | 2856.24 |      | 1437.63 | 1428.63 |      | 1532.67 | 1514.66 | 1515.65 | 766.84  | 757.83  | 758.33  | 14 | H |
| Q | 27 | 3002.31 | 2984.30 |      | 1501.66 | 1492.65 |      | 1395.61 | 1377.60 | 1378.59 | 698.31  | 689.31  | 689.80  | 13 | Q |

|   |    | b+      | -H2O    | -NH3    | b++     | -H2O    | -NH3    | y+      | -H2O    | -NH3    | y++    | -H2O   | -NH3   |    |   |
|---|----|---------|---------|---------|---------|---------|---------|---------|---------|---------|--------|--------|--------|----|---|
| N | 28 | 3116.35 | 3098.34 | 3099.33 | 1558.68 | 1549.68 | 1550.17 | 1267.55 | 1249.54 | 1250.53 | 634.28 | 625.28 | 625.77 | 12 | N |
| E | 29 | 3245.40 | 3227.39 | 3228.37 | 1623.20 | 1614.20 | 1614.69 | 1153.51 | 1135.50 | 1136.49 | 577.26 | 568.25 | 568.75 | 11 | E |
| Q | 30 | 3373.46 | 3355.45 | 3356.43 | 1687.23 | 1678.23 | 1678.72 | 1024.47 | 1006.46 | 1007.44 | 512.74 | 503.73 | 504.23 | 10 | Q |
| G | 31 | 3430.48 | 3412.47 | 3413.45 | 1715.74 | 1706.74 | 1707.23 | 896.41  | 878.40  | 879.38  | 448.71 | 439.70 | 440.20 | 9  | G |
| S | 32 | 3517.51 | 3499.50 | 3500.48 | 1759.26 | 1750.25 | 1750.75 | 839.39  | 821.38  | 822.36  | 420.20 | 411.19 | 411.69 | 8  | S |
| G | 33 | 3574.53 | 3556.52 | 3557.50 | 1787.77 | 1778.76 | 1779.26 | 752.36  | 734.35  | 735.33  | 376.68 | 367.68 | 368.17 | 7  | G |
| Y | 34 | 3737.59 | 3719.58 | 3720.57 | 1869.30 | 1860.30 | 1860.79 | 695.34  | 677.33  | 678.31  | 348.17 | 339.17 | 339.66 | 6  | Y |
| A | 35 | 3808.63 | 3790.62 | 3791.60 | 1904.82 | 1895.81 | 1896.31 | 532.27  | 514.26  | 515.25  | 266.64 | 257.63 | 258.13 | 5  | A |
| A | 36 | 3879.67 | 3861.66 | 3862.64 | 1940.34 | 1931.33 | 1931.82 | 461.24  | 443.22  | 444.21  | 231.12 | 222.12 | 222.61 | 4  | A |
| D | 37 | 3994.70 | 3976.68 | 3977.67 | 1997.85 | 1988.85 | 1989.34 | 390.20  | 372.19  | 373.17  | 195.60 | 186.60 | 187.09 | 3  | D |
| Q | 38 | 4122.75 | 4104.74 | 4105.73 | 2061.88 | 2052.88 | 2053.37 | 275.17  |         | 258.14  | 138.09 |        | 129.58 | 2  | Q |
| K | 39 |         |         |         |         |         |         | 147.11  |         | 130.09  | 74.06  |        | 65.55  | 1  | K |



WSN NP 9-19 unmodified

## SYEQMETDGER

Charge: 2, Exp. m/z: 672.773, Calc. m/z: 672.777

Data File: B110318\_004, Scans: 1748 - 1748

Max Intensity: 5.90e+02

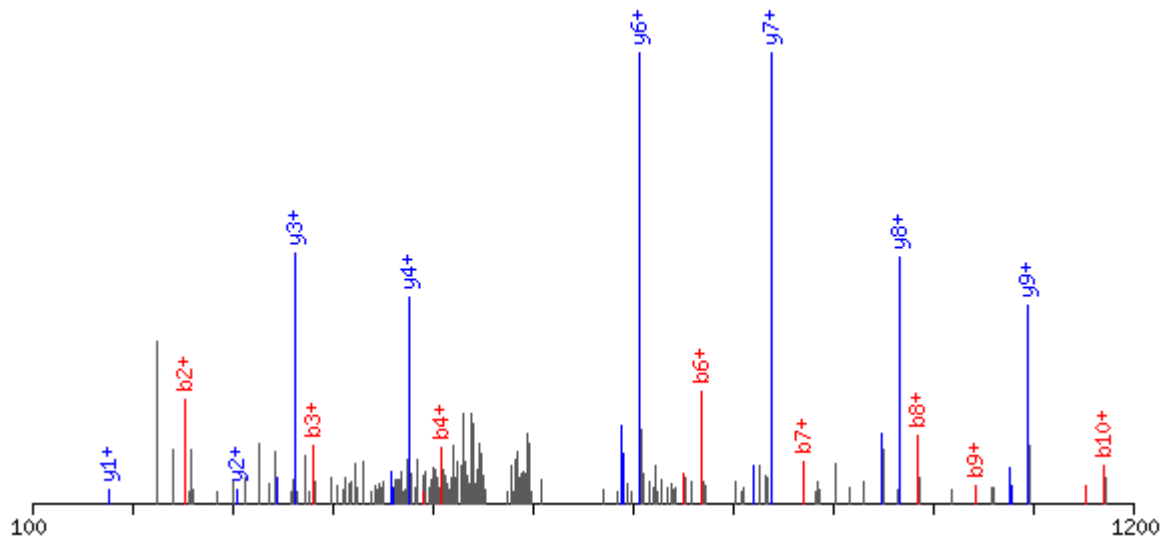

|   |    | b+      | -H2O    | y+      | -H2O    | -NH3    |    |   |
|---|----|---------|---------|---------|---------|---------|----|---|
| S | 1  | 88.04   | 70.03   |         |         |         | 11 | S |
| Y | 2  | 251.10  | 233.09  | 1257.51 | 1239.49 | 1240.48 | 10 | Y |
| E | 3  | 380.15  | 362.13  | 1094.44 | 1076.43 | 1077.42 | 9  | E |
| Q | 4  | 508.20  | 490.19  | 965.40  | 947.39  | 948.37  | 8  | Q |
| M | 5  | 639.24  | 621.23  | 837.34  | 819.33  | 820.31  | 7  | M |
| E | 6  | 768.29  | 750.28  | 706.30  | 688.29  | 689.27  | 6  | E |
| T | 7  | 869.33  | 851.32  | 577.26  | 559.25  | 560.23  | 5  | T |
| D | 8  | 984.36  | 966.35  | 476.21  | 458.20  | 459.18  | 4  | D |
| G | 9  | 1041.38 | 1023.37 | 361.18  | 343.17  | 344.16  | 3  | G |
| E | 10 | 1170.43 | 1152.42 | 304.16  | 286.15  | 287.14  | 2  | E |
| R | 11 |         |         | 175.12  |         | 158.09  | 1  | R |

WSN NP 9-19 phospho

## S(+79.97)YEQMETDGER

Charge: 2, Exp. m/z: 712.757, Calc. m/z: 712.757

Data File: B110406\_003, Scans: 423 - 423

Max Intensity: 3.14e+03

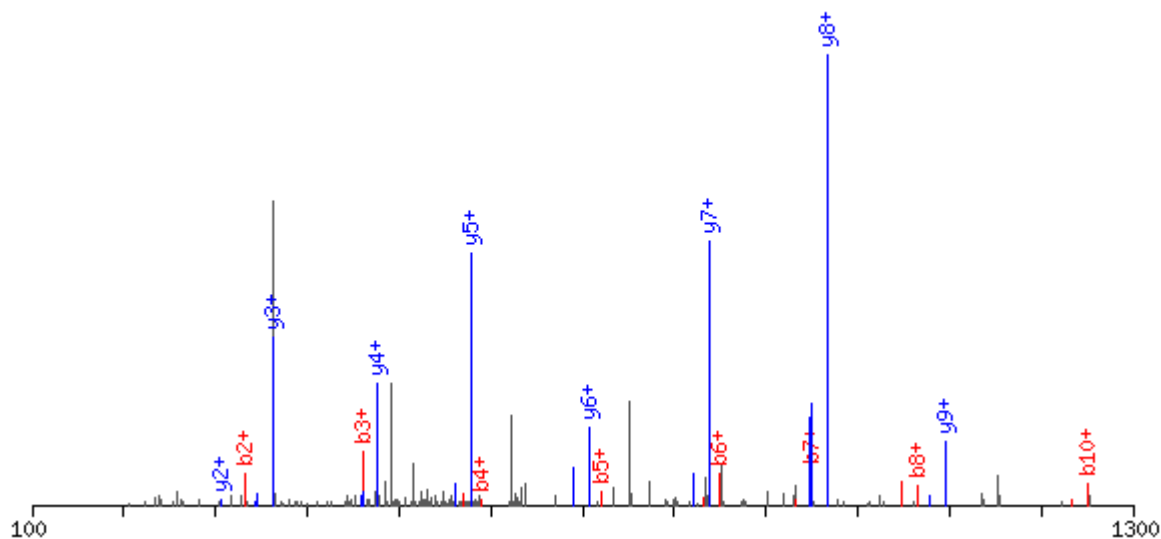

|   |    | b+      | -H2O    | y+      | -H2O    | -NH3    |    |   |
|---|----|---------|---------|---------|---------|---------|----|---|
| S | 1  | 168.01  | 150.00  |         |         |         | 11 | S |
| Y | 2  | 331.07  | 313.06  | 1257.51 | 1239.49 | 1240.48 | 10 | Y |
| E | 3  | 460.11  | 442.10  | 1094.44 | 1076.43 | 1077.42 | 9  | E |
| Q | 4  | 588.17  | 570.16  | 965.40  | 947.39  | 948.37  | 8  | Q |
| M | 5  | 719.21  | 701.20  | 837.34  | 819.33  | 820.31  | 7  | M |
| E | 6  | 848.25  | 830.24  | 706.30  | 688.29  | 689.27  | 6  | E |
| T | 7  | 949.30  | 931.29  | 577.26  | 559.25  | 560.23  | 5  | T |
| D | 8  | 1064.33 | 1046.32 | 476.21  | 458.20  | 459.18  | 4  | D |
| G | 9  | 1121.35 | 1103.34 | 361.18  | 343.17  | 344.16  | 3  | G |
| E | 10 | 1250.39 | 1232.38 | 304.16  | 286.15  | 287.14  | 2  | E |
| R | 11 |         |         | 175.12  |         | 158.09  | 1  | R |

WSN NP 163-174 carbamidomethyl

MC(+57.02)SLMQGSTLPR

Charge: 2, Exp. m/z: 690.825, Calc. m/z: 690.827

Data File: B110609\_017, Scans: 1450 - 1450

Max Intensity: 2.45e+03

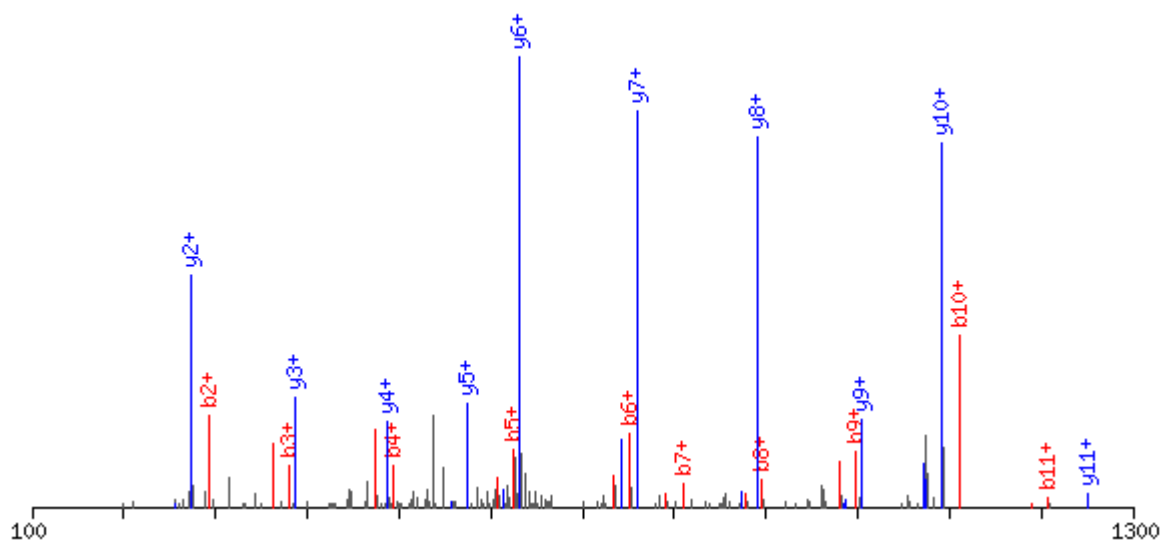

|   |    | b+      | -H2O    | y+      | -H2O    | -NH3    |    |   |
|---|----|---------|---------|---------|---------|---------|----|---|
| M | 1  | 132.05  |         |         |         |         | 12 | M |
| C | 2  | 292.08  |         | 1249.60 | 1231.59 | 1232.58 | 11 | C |
| S | 3  | 379.11  | 361.10  | 1089.57 | 1071.56 | 1072.55 | 10 | S |
| L | 4  | 492.19  | 474.18  | 1002.54 | 984.53  | 985.51  | 9  | L |
| M | 5  | 623.24  | 605.22  | 889.46  | 871.45  | 872.43  | 8  | M |
| Q | 6  | 751.29  | 733.28  | 758.42  | 740.40  | 741.39  | 7  | Q |
| G | 7  | 808.32  | 790.30  | 630.36  | 612.35  | 613.33  | 6  | G |
| S | 8  | 895.35  | 877.34  | 573.34  | 555.32  | 556.31  | 5  | S |
| T | 9  | 996.39  | 978.38  | 486.30  | 468.29  | 469.28  | 4  | T |
| L | 10 | 1109.48 | 1091.47 | 385.26  |         | 368.23  | 3  | L |
| P | 11 | 1206.53 | 1188.52 | 272.17  |         | 255.15  | 2  | P |
| R | 12 |         |         | 175.12  |         | 158.09  | 1  | R |

## WSN NP 163-174 carbamidomethyl and phospho

MC(+57.02)S(+79.97)LMQGSTLPR

Charge: 2, Exp. m/z: 730.810, Calc. m/z: 730.807

Data File: B110609\_010, Scans: 755 - 755

Max Intensity: 1.80e+02

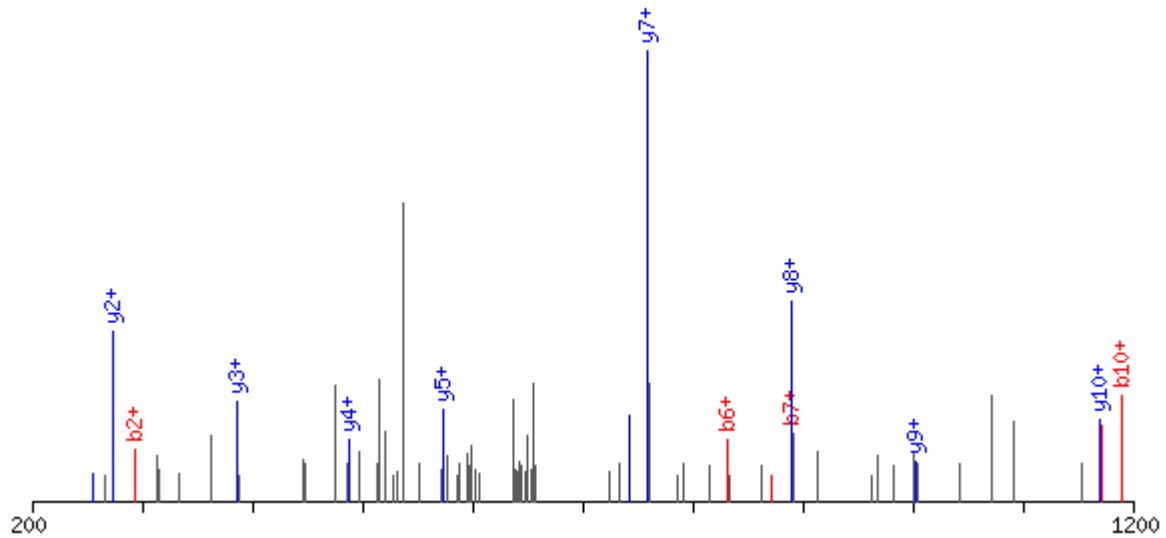

|   |    | b+      | -H2O    | y+      | -H2O    | -NH3    |    |   |
|---|----|---------|---------|---------|---------|---------|----|---|
| M | 1  | 132.05  |         |         |         |         | 12 | M |
| C | 2  | 292.08  |         | 1329.57 | 1311.56 | 1312.54 | 11 | C |
| S | 3  | 459.08  | 441.07  | 1169.54 | 1151.53 | 1152.51 | 10 | S |
| L | 4  | 572.16  | 554.15  | 1002.54 | 984.53  | 985.51  | 9  | L |
| M | 5  | 703.20  | 685.19  | 889.46  | 871.45  | 872.43  | 8  | M |
| Q | 6  | 831.26  | 813.25  | 758.42  | 740.40  | 741.39  | 7  | Q |
| G | 7  | 888.28  | 870.27  | 630.36  | 612.35  | 613.33  | 6  | G |
| S | 8  | 975.31  | 957.30  | 573.34  | 555.32  | 556.31  | 5  | S |
| T | 9  | 1076.36 | 1058.35 | 486.30  | 468.29  | 469.28  | 4  | T |
| L | 10 | 1189.45 | 1171.43 | 385.26  |         | 368.23  | 3  | L |
| P | 11 | 1286.50 | 1268.49 | 272.17  |         | 255.15  | 2  | P |
| R | 12 |         |         | 175.12  |         | 158.09  | 1  | R |

WSN NP 294-305 phospho

### EGYSLVGIDPFR

Charge: 2, Exp. m/z: 676.846, Calc. m/z: 676.847  
 Data File: B120705\_010, Scans: 938 - 938

Max Intensity: 5.48e+03

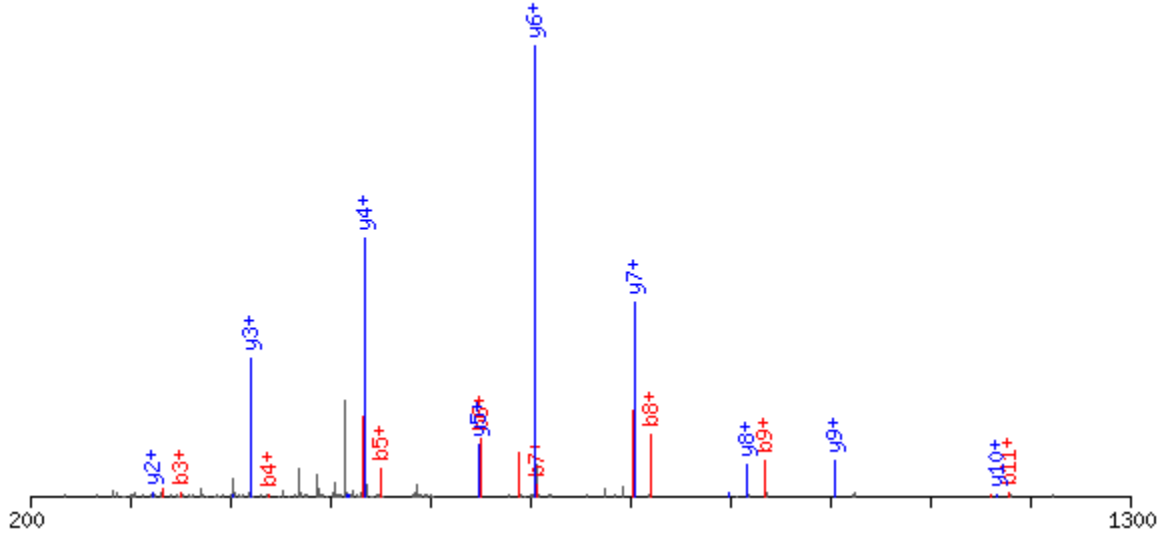

|   |    | b+      | -H2O    | y+      | -H2O    | -NH3    |    |   |
|---|----|---------|---------|---------|---------|---------|----|---|
| E | 1  | 130.05  | 112.04  |         |         |         | 12 | E |
| G | 2  | 187.07  | 169.06  | 1223.64 | 1205.63 | 1206.62 | 11 | G |
| Y | 3  | 350.13  | 332.12  | 1166.62 | 1148.61 | 1149.59 | 10 | Y |
| S | 4  | 437.17  | 419.16  | 1003.56 | 985.55  | 986.53  | 9  | S |
| L | 5  | 550.25  | 532.24  | 916.53  | 898.51  | 899.50  | 8  | L |
| V | 6  | 649.32  | 631.31  | 803.44  | 785.43  | 786.41  | 7  | V |
| G | 7  | 706.34  | 688.33  | 704.37  | 686.36  | 687.35  | 6  | G |
| I | 8  | 819.42  | 801.41  | 647.35  | 629.34  | 630.32  | 5  | I |
| D | 9  | 934.45  | 916.44  | 534.27  | 516.26  | 517.24  | 4  | D |
| P | 10 | 1031.50 | 1013.49 | 419.24  |         | 402.21  | 3  | P |
| F | 11 | 1178.57 | 1160.56 | 322.19  |         | 305.16  | 2  | F |
| R | 12 |         |         | 175.12  |         | 158.09  | 1  | R |

WSN NP 294-305 phospho

### EGYS(+79.97)LVGIDPFR

Charge: 2, Exp. m/z: 716.829, Calc. m/z: 716.827  
 Data File: B120705\_010, Scans: 1005 - 1005

Max Intensity: 3.33e+02

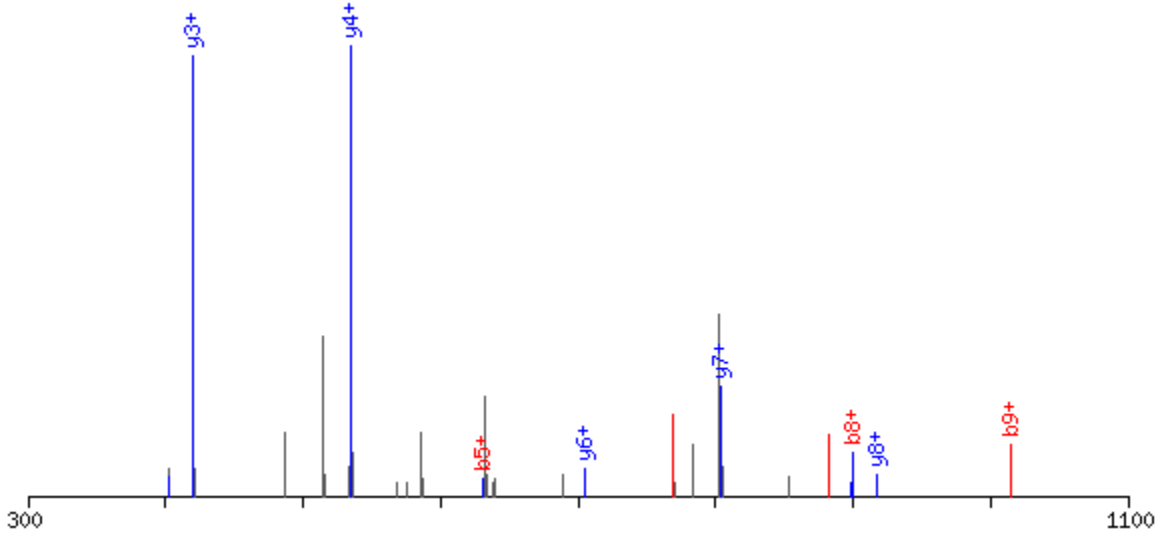

|          |    | b+      | -H2O    | y+      | -H2O    | -NH3    |    |          |
|----------|----|---------|---------|---------|---------|---------|----|----------|
| E        | 1  | 130.05  | 112.04  |         |         |         | 12 | E        |
| G        | 2  | 187.07  | 169.06  | 1303.61 | 1285.60 | 1286.58 | 11 | G        |
| Y        | 3  | 350.13  | 332.12  | 1246.59 | 1228.58 | 1229.56 | 10 | Y        |
| <u>S</u> | 4  | 517.13  | 499.12  | 1083.52 | 1065.51 | 1066.50 | 9  | <u>S</u> |
| L        | 5  | 630.22  | 612.21  | 916.53  | 898.51  | 899.50  | 8  | L        |
| V        | 6  | 729.29  | 711.27  | 803.44  | 785.43  | 786.41  | 7  | V        |
| G        | 7  | 786.31  | 768.30  | 704.37  | 686.36  | 687.35  | 6  | G        |
| I        | 8  | 899.39  | 881.38  | 647.35  | 629.34  | 630.32  | 5  | I        |
| D        | 9  | 1014.42 | 996.41  | 534.27  | 516.26  | 517.24  | 4  | D        |
| P        | 10 | 1111.47 | 1093.46 | 419.24  |         | 402.21  | 3  | P        |
| F        | 11 | 1258.54 | 1240.53 | 322.19  |         | 305.16  | 2  | F        |
| R        | 12 |         |         | 175.12  |         | 158.09  | 1  | R        |

WSN NP 362-382 modified

## GVQIASNENMETMESSTLELR

Charge: 2, Exp. m/z: 1171.040, Calc. m/z: 1170.052

Data File: D120711\_007, Scans: 24977 - 24977

Max Intensity: 7.71e+05

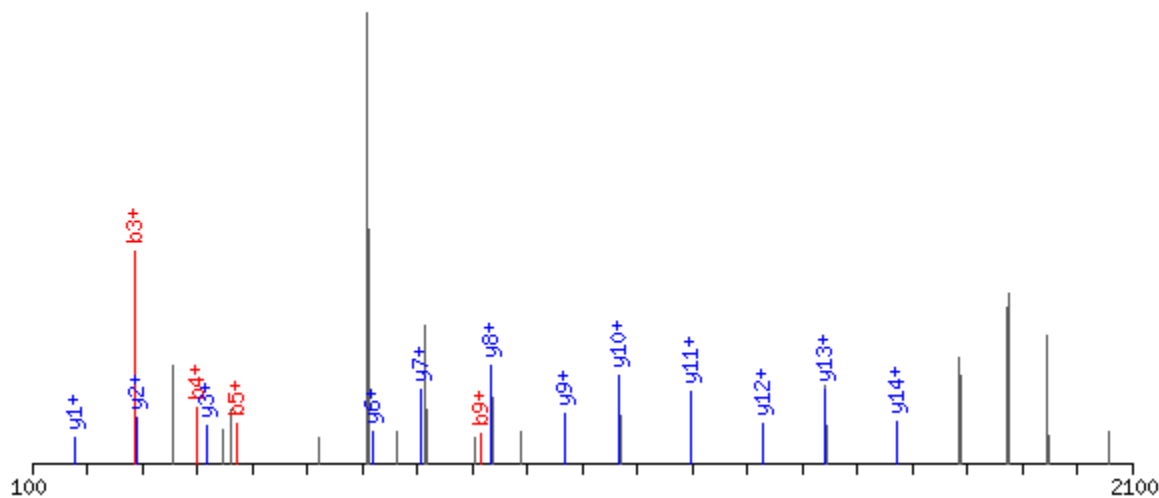

|   |    | b+      | -H2O    | -NH3    | y+      | -H2O    | -NH3    |    |   |
|---|----|---------|---------|---------|---------|---------|---------|----|---|
| G | 1  | 58.03   |         |         |         |         |         | 21 | G |
| V | 2  | 157.10  |         |         | 2282.06 | 2264.05 | 2265.04 | 20 | V |
| Q | 3  | 285.16  |         |         | 2183.00 | 2164.98 | 2165.97 | 19 | Q |
| I | 4  | 398.24  |         |         | 2054.94 | 2036.93 | 2037.91 | 18 | I |
| A | 5  | 469.28  |         |         | 1941.85 | 1923.84 | 1924.83 | 17 | A |
| S | 6  | 556.31  | 538.30  |         | 1870.82 | 1852.81 | 1853.79 | 16 | S |
| N | 7  | 670.35  | 652.34  | 653.33  | 1783.78 | 1765.77 | 1766.76 | 15 | N |
| E | 8  | 799.39  | 781.38  | 782.37  | 1669.74 | 1651.73 | 1652.71 | 14 | E |
| N | 9  | 913.44  | 895.43  | 896.41  | 1540.70 | 1522.69 | 1523.67 | 13 | N |
| M | 10 | 1044.48 | 1026.47 | 1027.45 | 1426.66 | 1408.64 | 1409.63 | 12 | M |
| E | 11 | 1173.52 | 1155.51 | 1156.49 | 1295.61 | 1277.60 | 1278.59 | 11 | E |
| T | 12 | 1274.57 | 1256.56 | 1257.54 | 1166.57 | 1148.56 | 1149.55 | 10 | T |
| M | 13 | 1405.61 | 1387.60 | 1388.58 | 1065.52 | 1047.51 | 1048.50 | 9  | M |
| E | 14 | 1534.65 | 1516.64 | 1517.62 | 934.48  | 916.47  | 917.46  | 8  | E |
| S | 15 | 1621.68 | 1603.67 | 1604.66 | 805.44  | 787.43  | 788.41  | 7  | S |
| S | 16 | 1708.72 | 1690.70 | 1691.69 | 718.41  | 700.40  | 701.38  | 6  | S |
| T | 17 | 1809.76 | 1791.75 | 1792.74 | 631.38  | 613.37  | 614.35  | 5  | T |
| L | 18 | 1922.85 | 1904.84 | 1905.82 | 530.33  | 512.32  | 513.30  | 4  | L |
| E | 19 | 2051.89 | 2033.88 | 2034.86 | 417.25  | 399.24  | 400.22  | 3  | E |
| L | 20 | 2164.97 | 2146.96 | 2147.95 | 288.20  |         | 271.18  | 2  | L |
| R | 21 |         |         |         | 175.12  |         | 158.09  | 1  | R |



WSN NP 362-382 phospho

## GVQIASNENMETMESST(+79.97)LELR

Charge: 2, Exp. m/z: 1210.520, Calc. m/z: 1210.032

Data File: D120711\_007, Scans: 20755 - 20755

Max Intensity: 9.68e+04

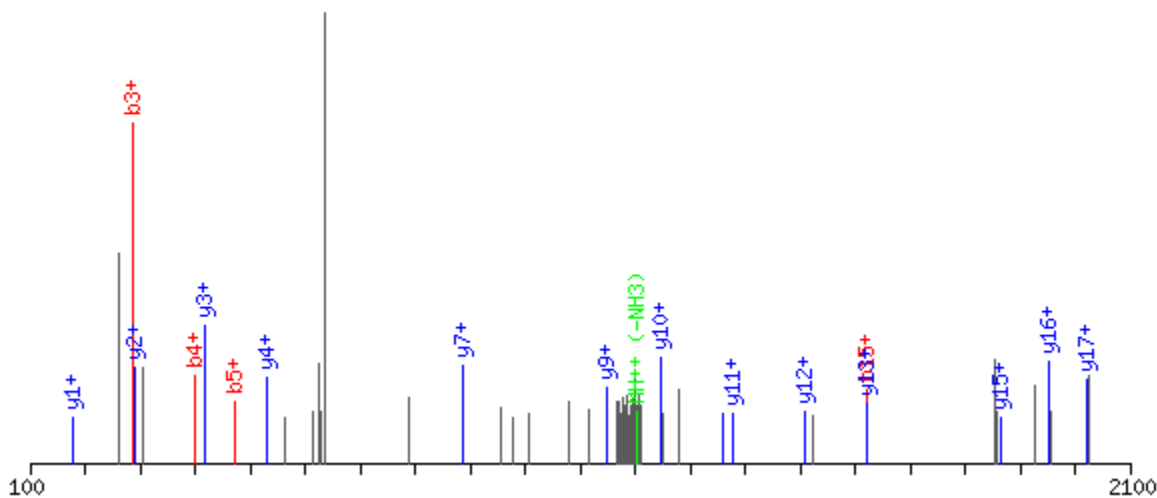

|   |    | b+      | -H2O    | -NH3    | y+      | -H2O    | -NH3    |    |   |
|---|----|---------|---------|---------|---------|---------|---------|----|---|
| G | 1  | 58.03   |         |         |         |         |         | 21 | G |
| V | 2  | 157.10  |         |         | 2362.03 | 2344.02 | 2345.00 | 20 | V |
| Q | 3  | 285.16  |         |         | 2262.96 | 2244.95 | 2245.94 | 19 | Q |
| I | 4  | 398.24  |         |         | 2134.90 | 2116.89 | 2117.88 | 18 | I |
| A | 5  | 469.28  |         |         | 2021.82 | 2003.81 | 2004.79 | 17 | A |
| S | 6  | 556.31  | 538.30  |         | 1950.78 | 1932.77 | 1933.76 | 16 | S |
| N | 7  | 670.35  | 652.34  | 653.33  | 1863.75 | 1845.74 | 1846.72 | 15 | N |
| E | 8  | 799.39  | 781.38  | 782.37  | 1749.71 | 1731.70 | 1732.68 | 14 | E |
| N | 9  | 913.44  | 895.43  | 896.41  | 1620.66 | 1602.65 | 1603.64 | 13 | N |
| M | 10 | 1044.48 | 1026.47 | 1027.45 | 1506.62 | 1488.61 | 1489.60 | 12 | M |
| E | 11 | 1173.52 | 1155.51 | 1156.49 | 1375.58 | 1357.57 | 1358.55 | 11 | E |
| T | 12 | 1274.57 | 1256.56 | 1257.54 | 1246.54 | 1228.53 | 1229.51 | 10 | T |
| M | 13 | 1405.61 | 1387.60 | 1388.58 | 1145.49 | 1127.48 | 1128.46 | 9  | M |
| E | 14 | 1534.65 | 1516.64 | 1517.62 | 1014.45 | 996.44  | 997.42  | 8  | E |
| S | 15 | 1621.68 | 1603.67 | 1604.66 | 885.41  | 867.40  | 868.38  | 7  | S |
| S | 16 | 1708.72 | 1690.70 | 1691.69 | 798.38  | 780.37  | 781.35  | 6  | S |
| I | 17 | 1889.73 | 1871.72 | 1872.70 | 711.34  | 693.33  | 694.32  | 5  | I |
| L | 18 | 2002.81 | 1984.80 | 1985.79 | 530.33  | 512.32  | 513.30  | 4  | L |
| E | 19 | 2131.86 | 2113.85 | 2114.83 | 417.25  | 399.24  | 400.22  | 3  | E |
| L | 20 | 2244.94 | 2226.93 | 2227.91 | 288.20  |         | 271.18  | 2  | L |
| R | 21 |         |         |         | 175.12  |         | 158.09  | 1  | R |

WSN NP 401-416 unmodified

## ASSGQISIQPTFSVQR

Charge: 2, Exp. m/z: 853.447, Calc. m/z: 853.447

Data File: B110818\_008, Scans: 744 - 744

Max Intensity: 2.83e+04

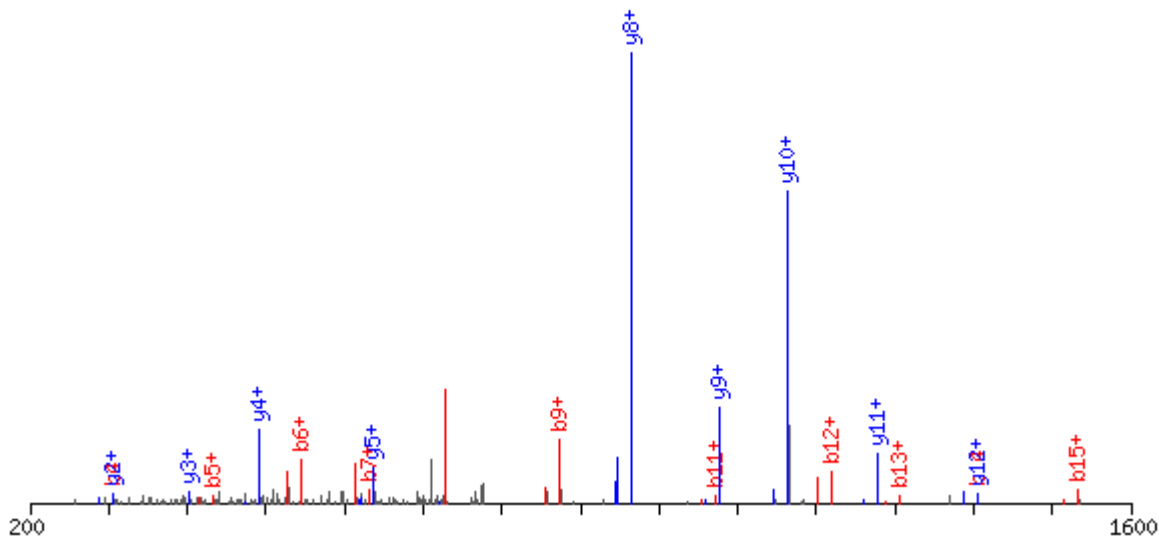

|   |    | b+      | -H2O    | y+      | -H2O    | -NH3    |    |   |
|---|----|---------|---------|---------|---------|---------|----|---|
| A | 1  | 72.04   |         |         |         |         | 16 | A |
| S | 2  | 159.08  | 141.07  | 1634.85 | 1616.84 | 1617.82 | 15 | S |
| S | 3  | 246.11  | 228.10  | 1547.82 | 1529.81 | 1530.79 | 14 | S |
| G | 4  | 303.13  | 285.12  | 1460.79 | 1442.78 | 1443.76 | 13 | G |
| Q | 5  | 431.19  | 413.18  | 1403.76 | 1385.75 | 1386.74 | 12 | Q |
| I | 6  | 544.27  | 526.26  | 1275.71 | 1257.70 | 1258.68 | 11 | I |
| S | 7  | 631.30  | 613.29  | 1162.62 | 1144.61 | 1145.59 | 10 | S |
| I | 8  | 744.39  | 726.38  | 1075.59 | 1057.58 | 1058.56 | 9  | I |
| Q | 9  | 872.45  | 854.44  | 962.51  | 944.49  | 945.48  | 8  | Q |
| P | 10 | 969.50  | 951.49  | 834.45  | 816.44  | 817.42  | 7  | P |
| T | 11 | 1070.55 | 1052.54 | 737.39  | 719.38  | 720.37  | 6  | T |
| F | 12 | 1217.62 | 1199.61 | 636.35  | 618.34  | 619.32  | 5  | F |
| S | 13 | 1304.65 | 1286.64 | 489.28  | 471.27  | 472.25  | 4  | S |
| V | 14 | 1403.72 | 1385.71 | 402.25  |         | 385.22  | 3  | V |
| Q | 15 | 1531.78 | 1513.76 | 303.18  |         | 286.15  | 2  | Q |
| R | 16 |         |         | 175.12  |         | 158.09  | 1  | R |

WSN NP 401-416 phospho

### ASS(+79.97)GQISIQPTFSVQR

Charge: 2, Exp. m/z: 893.434, Calc. m/z: 893.432

Data File: B110616\_003, Scans: 914 - 914

Max Intensity: 7.51e+02

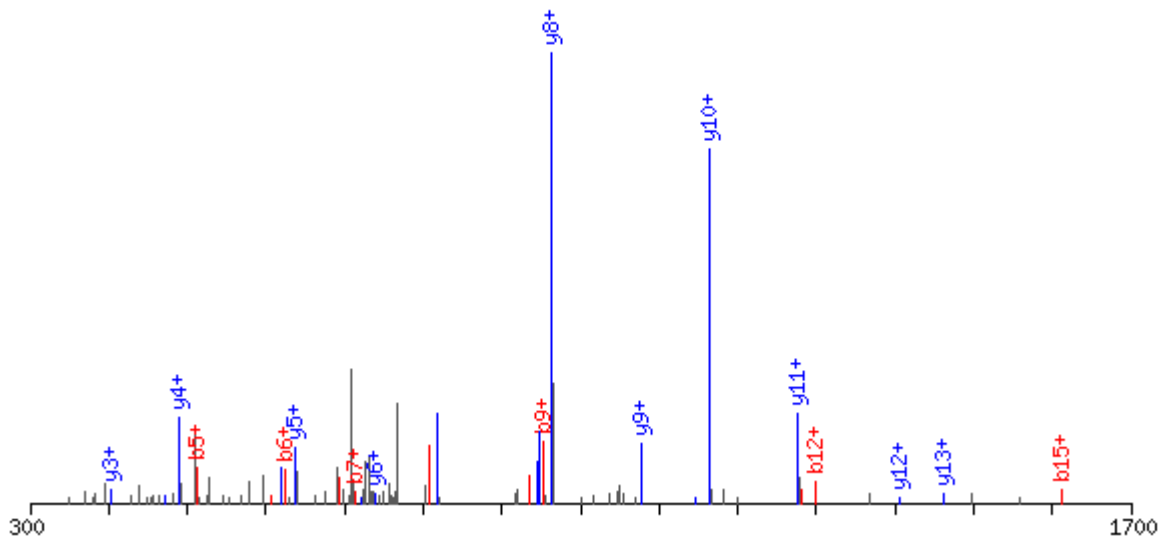

|   |    | b+      | -H2O    | y+      | -H2O    | -NH3    |    |   |
|---|----|---------|---------|---------|---------|---------|----|---|
| A | 1  | 72.04   |         |         |         |         | 16 | A |
| S | 2  | 159.08  | 141.07  | 1714.82 | 1696.81 | 1697.79 | 15 | S |
| S | 3  | 326.07  | 308.06  | 1627.78 | 1609.77 | 1610.76 | 14 | S |
| G | 4  | 383.10  | 365.09  | 1460.79 | 1442.78 | 1443.76 | 13 | G |
| Q | 5  | 511.15  | 493.14  | 1403.76 | 1385.75 | 1386.74 | 12 | Q |
| I | 6  | 624.24  | 606.23  | 1275.71 | 1257.70 | 1258.68 | 11 | I |
| S | 7  | 711.27  | 693.26  | 1162.62 | 1144.61 | 1145.59 | 10 | S |
| I | 8  | 824.35  | 806.34  | 1075.59 | 1057.58 | 1058.56 | 9  | I |
| Q | 9  | 952.41  | 934.40  | 962.51  | 944.49  | 945.48  | 8  | Q |
| P | 10 | 1049.47 | 1031.46 | 834.45  | 816.44  | 817.42  | 7  | P |
| T | 11 | 1150.51 | 1132.50 | 737.39  | 719.38  | 720.37  | 6  | T |
| F | 12 | 1297.58 | 1279.57 | 636.35  | 618.34  | 619.32  | 5  | F |
| S | 13 | 1384.61 | 1366.60 | 489.28  | 471.27  | 472.25  | 4  | S |
| V | 14 | 1483.68 | 1465.67 | 402.25  |         | 385.22  | 3  | V |
| Q | 15 | 1611.74 | 1593.73 | 303.18  |         | 286.15  | 2  | Q |
| R | 16 |         |         | 175.12  |         | 158.09  | 1  | R |

WSN NP 447-461 unmodified

## LMESARPEDVSFQGR

Charge: 3, Exp. m/z: 574.616, Calc. m/z: 574.614

Data File: B110318\_004, Scans: 2072 - 2072

Max Intensity: 2.30e+05

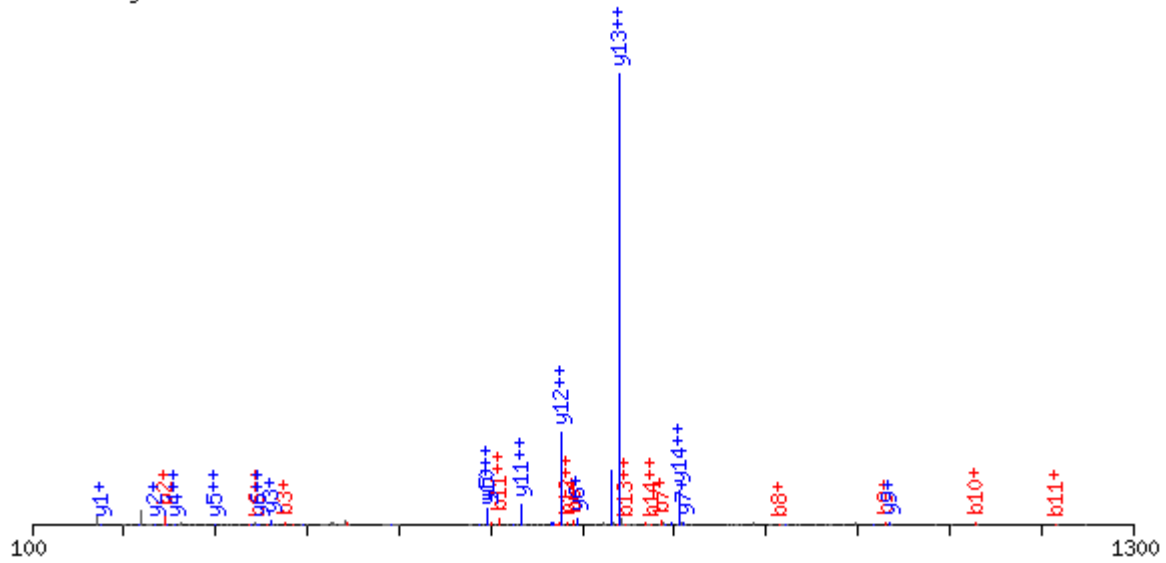[Hiding fragment losses - Click to Show](#)

|   |    | b+      | b++    | y+      | y++    |    |   |
|---|----|---------|--------|---------|--------|----|---|
| L | 1  | 114.09  | 57.55  |         |        | 15 | L |
| M | 2  | 245.13  | 123.07 | 1608.74 | 804.88 | 14 | M |
| E | 3  | 374.17  | 187.59 | 1477.70 | 739.36 | 13 | E |
| S | 4  | 461.21  | 231.11 | 1348.66 | 674.83 | 12 | S |
| A | 5  | 532.24  | 266.63 | 1261.63 | 631.32 | 11 | A |
| R | 6  | 688.34  | 344.68 | 1190.59 | 595.80 | 10 | R |
| P | 7  | 785.40  | 393.20 | 1034.49 | 517.75 | 9  | P |
| E | 8  | 914.44  | 457.72 | 937.44  | 469.22 | 8  | E |
| D | 9  | 1029.47 | 515.24 | 808.39  | 404.70 | 7  | D |
| V | 10 | 1128.54 | 564.77 | 693.37  | 347.19 | 6  | V |
| S | 11 | 1215.57 | 608.29 | 594.30  | 297.65 | 5  | S |
| F | 12 | 1362.64 | 681.82 | 507.27  | 254.14 | 4  | F |
| Q | 13 | 1490.69 | 745.85 | 360.20  | 180.60 | 3  | Q |
| G | 14 | 1547.72 | 774.36 | 232.14  | 116.57 | 2  | G |
| R | 15 |         |        | 175.12  | 88.06  | 1  | R |

WSN NP 447-461 phospho

## LMESARPEDVS(+79.97)FQGR

Charge: 2, Exp. m/z: 901.402, Calc. m/z: 901.402

Data File: B110609\_010, Scans: 549 - 549

Max Intensity: 4.30e+02

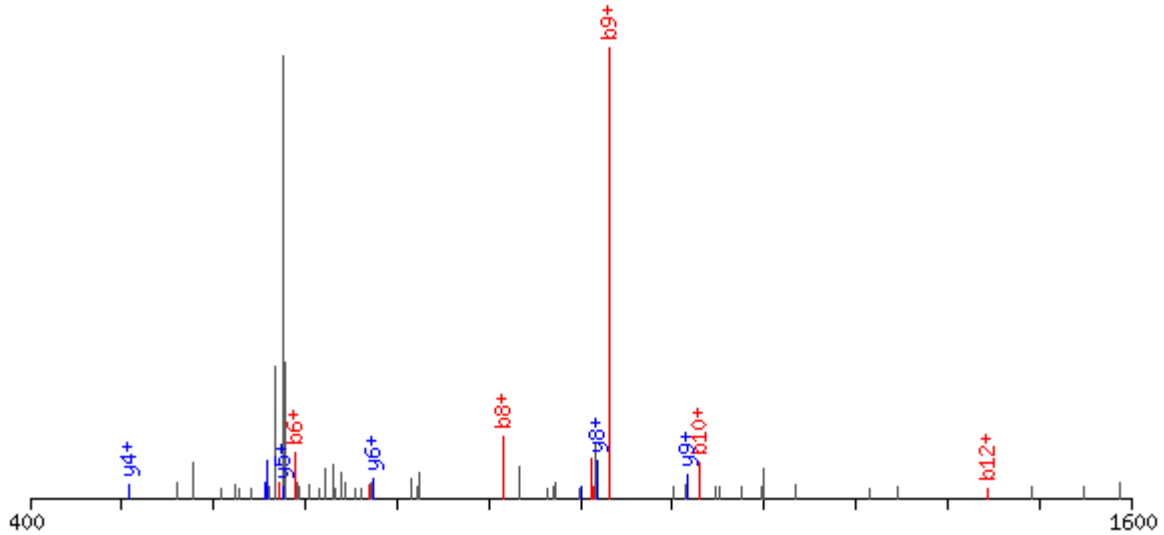

|          |    | b+      | -H2O    | -NH3    | y+      | -H2O    | -NH3    |    |          |
|----------|----|---------|---------|---------|---------|---------|---------|----|----------|
| L        | 1  | 114.09  |         |         |         |         |         | 15 | L        |
| M        | 2  | 245.13  |         |         | 1688.71 | 1670.70 | 1671.68 | 14 | M        |
| E        | 3  | 374.17  | 356.16  |         | 1557.67 | 1539.66 | 1540.64 | 13 | E        |
| S        | 4  | 461.21  | 443.20  |         | 1428.63 | 1410.62 | 1411.60 | 12 | S        |
| A        | 5  | 532.24  | 514.23  |         | 1341.59 | 1323.58 | 1324.57 | 11 | A        |
| R        | 6  | 688.34  | 670.33  | 671.32  | 1270.56 | 1252.55 | 1253.53 | 10 | R        |
| P        | 7  | 785.40  | 767.39  | 768.37  | 1114.46 | 1096.45 | 1097.43 | 9  | P        |
| E        | 8  | 914.44  | 896.43  | 897.41  | 1017.40 | 999.39  | 1000.38 | 8  | E        |
| D        | 9  | 1029.47 | 1011.46 | 1012.44 | 888.36  | 870.35  | 871.33  | 7  | D        |
| V        | 10 | 1128.54 | 1110.52 | 1111.51 | 773.33  | 755.32  | 756.31  | 6  | V        |
| <u>S</u> | 11 | 1295.53 | 1277.52 | 1278.51 | 674.27  | 656.26  | 657.24  | 5  | <u>S</u> |
| F        | 12 | 1442.60 | 1424.59 | 1425.58 | 507.27  |         | 490.24  | 4  | F        |
| Q        | 13 | 1570.66 | 1552.65 | 1553.63 | 360.20  |         | 343.17  | 3  | Q        |
| G        | 14 | 1627.68 | 1609.67 | 1610.66 | 232.14  |         | 215.11  | 2  | G        |
| R        | 15 |         |         |         | 175.12  |         | 158.09  | 1  | R        |

WSN NP 471-492 unmodified

## ATSPIVPSFDMSENGSYFFGDNAEEYDN

Charge: 2, Exp. m/z: 1552.140, Calc. m/z: 1552.142

Data File: B110802\_015, Scans: 3349 - 3349

Max Intensity: 4.30e+01

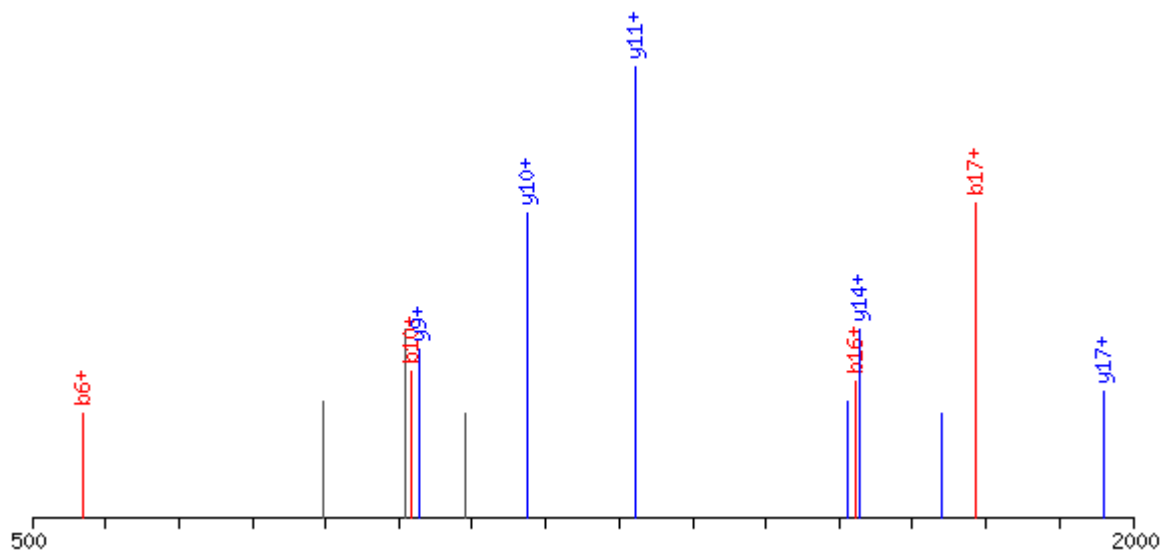

|   |    | b+      | -H2O    | -NH3    | y+      | -H2O    | -NH3    |    |   |
|---|----|---------|---------|---------|---------|---------|---------|----|---|
| A | 1  | 72.04   |         |         |         |         |         | 28 | A |
| T | 2  | 173.09  | 155.08  |         | 3032.24 | 3014.23 | 3015.21 | 27 | T |
| S | 3  | 260.12  | 242.11  |         | 2931.19 | 2913.18 | 2914.17 | 26 | S |
| P | 4  | 357.18  | 339.17  |         | 2844.16 | 2826.15 | 2827.14 | 25 | P |
| I | 5  | 470.26  | 452.25  |         | 2747.11 | 2729.10 | 2730.08 | 24 | I |
| V | 6  | 569.33  | 551.32  |         | 2634.02 | 2616.01 | 2617.00 | 23 | V |
| P | 7  | 666.38  | 648.37  |         | 2534.96 | 2516.95 | 2517.93 | 22 | P |
| S | 8  | 753.41  | 735.40  |         | 2437.90 | 2419.89 | 2420.88 | 21 | S |
| F | 9  | 900.48  | 882.47  |         | 2350.87 | 2332.86 | 2333.85 | 20 | F |
| D | 10 | 1015.51 | 997.50  |         | 2203.80 | 2185.79 | 2186.78 | 19 | D |
| M | 11 | 1146.55 | 1128.54 |         | 2088.78 | 2070.77 | 2071.75 | 18 | M |
| S | 12 | 1233.58 | 1215.57 |         | 1957.74 | 1939.73 | 1940.71 | 17 | S |
| N | 13 | 1347.62 | 1329.61 | 1330.60 | 1870.70 | 1852.69 | 1853.68 | 16 | N |
| E | 14 | 1476.67 | 1458.66 | 1459.64 | 1756.66 | 1738.65 | 1739.63 | 15 | E |
| G | 15 | 1533.69 | 1515.68 | 1516.66 | 1627.62 | 1609.61 | 1610.59 | 14 | G |
| S | 16 | 1620.72 | 1602.71 | 1603.69 | 1570.60 | 1552.59 | 1553.57 | 13 | S |
| Y | 17 | 1783.78 | 1765.77 | 1766.76 | 1483.56 | 1465.55 | 1466.54 | 12 | Y |
| F | 18 | 1930.85 | 1912.84 | 1913.83 | 1320.50 | 1302.49 | 1303.47 | 11 | F |
| F | 19 | 2077.92 | 2059.91 | 2060.89 | 1173.43 | 1155.42 | 1156.41 | 10 | F |
| G | 20 | 2134.94 | 2116.93 | 2117.92 | 1026.36 | 1008.35 | 1009.34 | 9  | G |
| D | 21 | 2249.97 | 2231.96 | 2232.94 | 969.34  | 951.33  | 952.32  | 8  | D |
| N | 22 | 2364.01 | 2346.00 | 2346.99 | 854.32  | 836.31  | 837.29  | 7  | N |
| A | 23 | 2435.05 | 2417.04 | 2418.02 | 740.27  | 722.26  | 723.25  | 6  | A |
| E | 24 | 2564.09 | 2546.08 | 2547.07 | 669.24  | 651.23  | 652.21  | 5  | E |
| E | 25 | 2693.13 | 2675.12 | 2676.11 | 540.19  | 522.18  | 523.17  | 4  | E |
| Y | 26 | 2856.20 | 2838.19 | 2839.17 | 411.15  | 393.14  | 394.12  | 3  | Y |
| D | 27 | 2971.23 | 2953.21 | 2954.20 | 248.09  | 230.08  | 231.06  | 2  | D |
| N | 28 |         |         |         | 133.06  |         | 116.03  | 1  | N |

WSN NP 471-492 phospho

AT(+79.97)SPIVPSFDMSNEGSYFFGDNAEEYDN

Charge: 3, Exp. m/z: 1061.760, Calc. m/z: 1061.754

Data File: B110609\_010, Scans: 1418 - 1418

Max Intensity: 6.60e+02

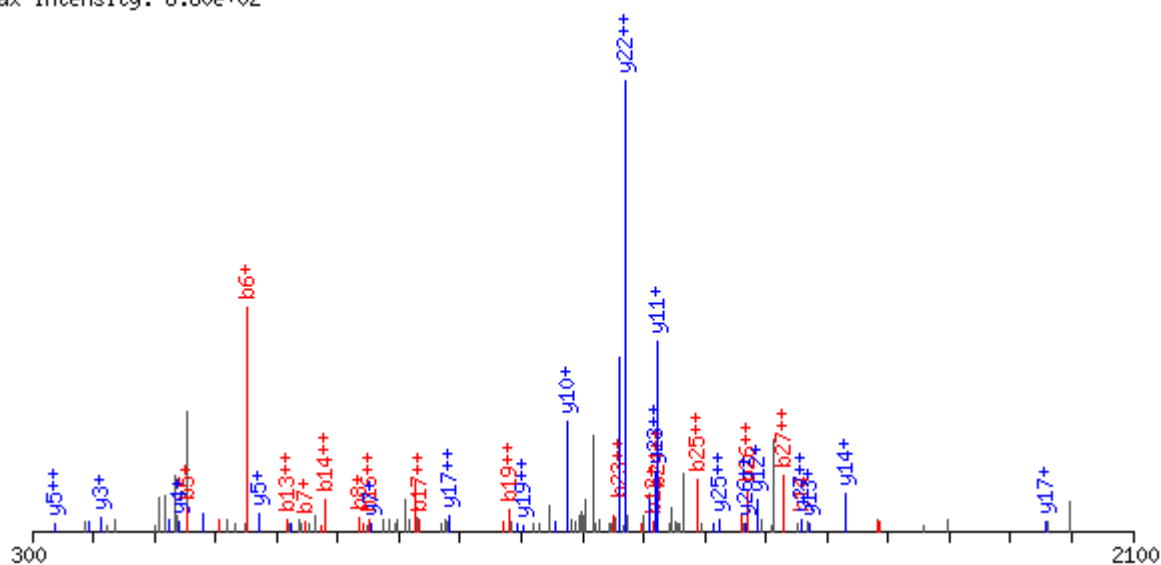[Hiding fragment losses - Click to Show](#)

|   |    | b+      | b++     | y+      | y++     |    |   |
|---|----|---------|---------|---------|---------|----|---|
| A | 1  | 72.04   | 36.53   |         |         | 28 | A |
| T | 2  | 253.06  | 127.03  | 3112.21 | 1556.61 | 27 | T |
| S | 3  | 340.09  | 170.55  | 2931.19 | 1466.10 | 26 | S |
| P | 4  | 437.14  | 219.08  | 2844.16 | 1422.58 | 25 | P |
| I | 5  | 550.23  | 275.62  | 2747.11 | 1374.06 | 24 | I |
| V | 6  | 649.30  | 325.15  | 2634.02 | 1317.52 | 23 | V |
| P | 7  | 746.35  | 373.68  | 2534.96 | 1267.98 | 22 | P |
| S | 8  | 833.38  | 417.19  | 2437.90 | 1219.46 | 21 | S |
| F | 9  | 980.45  | 490.73  | 2350.87 | 1175.94 | 20 | F |
| D | 10 | 1095.48 | 548.24  | 2203.80 | 1102.41 | 19 | D |
| M | 11 | 1226.52 | 613.76  | 2088.78 | 1044.89 | 18 | M |
| S | 12 | 1313.55 | 657.28  | 1957.74 | 979.37  | 17 | S |
| N | 13 | 1427.59 | 714.30  | 1870.70 | 935.86  | 16 | N |
| E | 14 | 1556.63 | 778.82  | 1756.66 | 878.83  | 15 | E |
| G | 15 | 1613.66 | 807.33  | 1627.62 | 814.31  | 14 | G |
| S | 16 | 1700.69 | 850.85  | 1570.60 | 785.80  | 13 | S |
| Y | 17 | 1863.75 | 932.38  | 1483.56 | 742.29  | 12 | Y |
| F | 18 | 2010.82 | 1005.91 | 1320.50 | 660.75  | 11 | F |
| F | 19 | 2157.89 | 1079.45 | 1173.43 | 587.22  | 10 | F |
| G | 20 | 2214.91 | 1107.96 | 1026.36 | 513.69  | 9  | G |
| D | 21 | 2329.94 | 1165.47 | 969.34  | 485.18  | 8  | D |
| N | 22 | 2443.98 | 1222.49 | 854.32  | 427.66  | 7  | N |
| A | 23 | 2515.02 | 1258.01 | 740.27  | 370.64  | 6  | A |
| E | 24 | 2644.06 | 1322.53 | 669.24  | 335.12  | 5  | E |
| E | 25 | 2773.10 | 1387.05 | 540.19  | 270.60  | 4  | E |
| Y | 26 | 2936.16 | 1468.59 | 411.15  | 206.08  | 3  | Y |
| D | 27 | 3051.19 | 1526.10 | 248.09  | 124.55  | 2  | D |

|   |    | <b>b+</b> | <b>b++</b> | <b>y+</b> | <b>y++</b> |   |   |
|---|----|-----------|------------|-----------|------------|---|---|
| N | 28 |           |            | 133.06    | 67.03      | 1 | N |



WSN NA 158-191 carbamidomethyl

FESVAWSASAC(+57.02)HDGMGWLTI<sup>g</sup>ISGPDDGAVAVLK

Charge: 3, Exp. m/z: 1168.890, Calc. m/z: 1168.891

Data File: B110818\_003, Scans: 1333 - 1333

Max Intensity: 1.43e+03

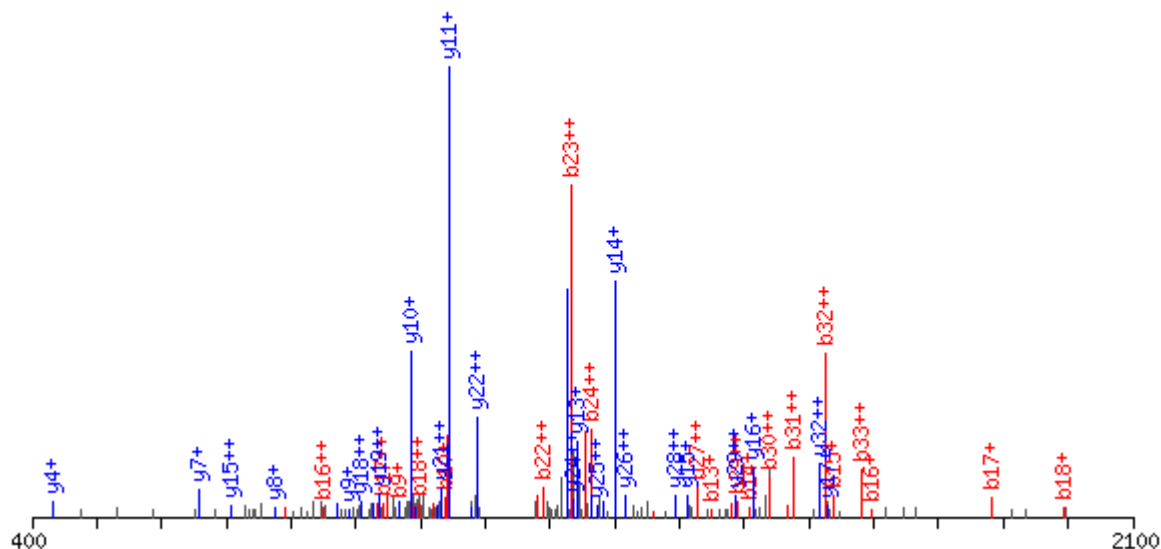

|   |    | b+      | -H2O    | b++     | -H2O    | y+      | -H2O    | -NH3    | y++     | -H2O    | -NH3    |    |   |
|---|----|---------|---------|---------|---------|---------|---------|---------|---------|---------|---------|----|---|
| F | 1  | 148.08  |         | 74.54   |         |         |         |         |         |         |         | 34 | F |
| E | 2  | 277.12  | 259.11  | 139.06  | 130.06  | 3357.59 | 3339.58 | 3340.56 | 1679.30 | 1670.29 | 1670.78 | 33 | E |
| S | 3  | 364.15  | 346.14  | 182.58  | 173.57  | 3228.55 | 3210.53 | 3211.52 | 1614.78 | 1605.77 | 1606.26 | 32 | S |
| V | 4  | 463.22  | 445.21  | 232.11  | 223.11  | 3141.51 | 3123.50 | 3124.49 | 1571.26 | 1562.25 | 1562.75 | 31 | V |
| A | 5  | 534.26  | 516.25  | 267.63  | 258.63  | 3042.44 | 3024.43 | 3025.42 | 1521.73 | 1512.72 | 1513.21 | 30 | A |
| W | 6  | 720.34  | 702.32  | 360.67  | 351.67  | 2971.41 | 2953.40 | 2954.38 | 1486.21 | 1477.20 | 1477.69 | 29 | W |
| S | 7  | 807.37  | 789.36  | 404.19  | 395.18  | 2785.33 | 2767.32 | 2768.30 | 1393.17 | 1384.16 | 1384.65 | 28 | S |
| A | 8  | 878.40  | 860.39  | 439.71  | 430.70  | 2698.30 | 2680.29 | 2681.27 | 1349.65 | 1340.65 | 1341.14 | 27 | A |
| S | 9  | 965.44  | 947.43  | 483.22  | 474.22  | 2627.26 | 2609.25 | 2610.23 | 1314.13 | 1305.13 | 1305.62 | 26 | S |
| A | 10 | 1036.47 | 1018.46 | 518.74  | 509.74  | 2540.23 | 2522.22 | 2523.20 | 1270.62 | 1261.61 | 1262.10 | 25 | A |
| C | 11 | 1196.50 | 1178.49 | 598.76  | 589.75  | 2469.19 | 2451.18 | 2452.16 | 1235.10 | 1226.09 | 1226.59 | 24 | C |
| H | 12 | 1333.56 | 1315.55 | 667.29  | 658.28  | 2309.16 | 2291.15 | 2292.13 | 1155.08 | 1146.08 | 1146.57 | 23 | H |
| D | 13 | 1448.59 | 1430.58 | 724.80  | 715.79  | 2172.10 | 2154.09 | 2155.07 | 1086.55 | 1077.55 | 1078.04 | 22 | D |
| G | 14 | 1505.61 | 1487.60 | 753.31  | 744.30  | 2057.07 | 2039.06 | 2040.05 | 1029.04 | 1020.04 | 1020.53 | 21 | G |
| M | 15 | 1636.65 | 1618.64 | 818.83  | 809.82  | 2000.05 | 1982.04 | 1983.03 | 1000.53 | 991.52  | 992.02  | 20 | M |
| G | 16 | 1693.67 | 1675.66 | 847.34  | 838.34  | 1869.01 | 1851.00 | 1851.99 | 935.01  | 926.00  | 926.50  | 19 | G |
| W | 17 | 1879.75 | 1861.74 | 940.38  | 931.37  | 1811.99 | 1793.98 | 1794.96 | 906.50  | 897.49  | 897.99  | 18 | W |
| L | 18 | 1992.84 | 1974.83 | 996.92  | 987.92  | 1625.91 | 1607.90 | 1608.88 | 813.46  | 804.45  | 804.95  | 17 | L |
| T | 19 | 2093.88 | 2075.87 | 1047.45 | 1038.44 | 1512.83 | 1494.82 | 1495.80 | 756.92  | 747.91  | 748.40  | 16 | T |
| I | 20 | 2206.97 | 2188.96 | 1103.99 | 1094.98 | 1411.78 | 1393.77 | 1394.75 | 706.39  | 697.39  | 697.88  | 15 | I |
| G | 21 | 2263.99 | 2245.98 | 1132.50 | 1123.49 | 1298.70 | 1280.68 | 1281.67 | 649.85  | 640.85  | 641.34  | 14 | G |
| I | 22 | 2377.07 | 2359.06 | 1189.04 | 1180.04 | 1241.67 | 1223.66 | 1224.65 | 621.34  | 612.34  | 612.83  | 13 | I |
| S | 23 | 2464.11 | 2446.10 | 1232.56 | 1223.55 | 1128.59 | 1110.58 | 1111.56 | 564.80  | 555.79  | 556.29  | 12 | S |
| G | 24 | 2521.13 | 2503.12 | 1261.07 | 1252.06 | 1041.56 | 1023.55 | 1024.53 | 521.28  | 512.28  | 512.77  | 11 | G |
| P | 25 | 2618.18 | 2600.17 | 1309.59 | 1300.59 | 984.54  | 966.53  | 967.51  | 492.77  | 483.77  | 484.26  | 10 | P |
| D | 26 | 2733.21 | 2715.20 | 1367.11 | 1358.10 | 887.48  | 869.47  | 870.46  | 444.25  | 435.24  | 435.73  | 9  | D |
| D | 27 | 2848.23 | 2830.22 | 1424.62 | 1415.62 | 772.46  | 754.45  | 755.43  | 386.73  | 377.73  | 378.22  | 8  | D |
| G | 28 | 2905.26 | 2887.25 | 1453.13 | 1444.13 | 657.43  |         | 640.40  | 329.22  |         | 320.71  | 7  | G |
| A | 29 | 2976.29 | 2958.28 | 1488.65 | 1479.64 | 600.41  |         | 583.38  | 300.71  |         | 292.19  | 6  | A |

|   |    | <b>b+</b> | <b>-H2O</b> | <b>b++</b> | <b>-H2O</b> | <b>y+</b> | <b>-H2O</b> | <b>-NH3</b> | <b>y++</b> | <b>-H2O</b> | <b>-NH3</b> |   |   |
|---|----|-----------|-------------|------------|-------------|-----------|-------------|-------------|------------|-------------|-------------|---|---|
| V | 30 | 3075.36   | 3057.35     | 1538.18    | 1529.18     | 529.37    |             | 512.34      | 265.19     |             | 256.68      | 5 | V |
| A | 31 | 3146.40   | 3128.39     | 1573.70    | 1564.70     | 430.30    |             | 413.28      | 215.65     |             | 207.14      | 4 | A |
| V | 32 | 3245.47   | 3227.46     | 1623.24    | 1614.23     | 359.27    |             | 342.24      | 180.14     |             | 171.62      | 3 | V |
| L | 33 | 3358.55   | 3340.54     | 1679.78    | 1670.77     | 260.20    |             | 243.17      | 130.60     |             | 122.09      | 2 | L |
| K | 34 |           |             |            |             | 147.11    |             | 130.09      | 74.06      |             | 65.55       | 1 | K |

## WSN NA 158-191 carbamidomethyl and phosho

## FES(+79.97)VAWSASAC(+57.02)HDGMGWLTIIGSPDDGAVAVLK

Charge: 3, Exp. m/z: 1195.550, Calc. m/z: 1195.544

Data File: B110818\_004, Scans: 1060 - 1060

Max Intensity: 9.60e+01

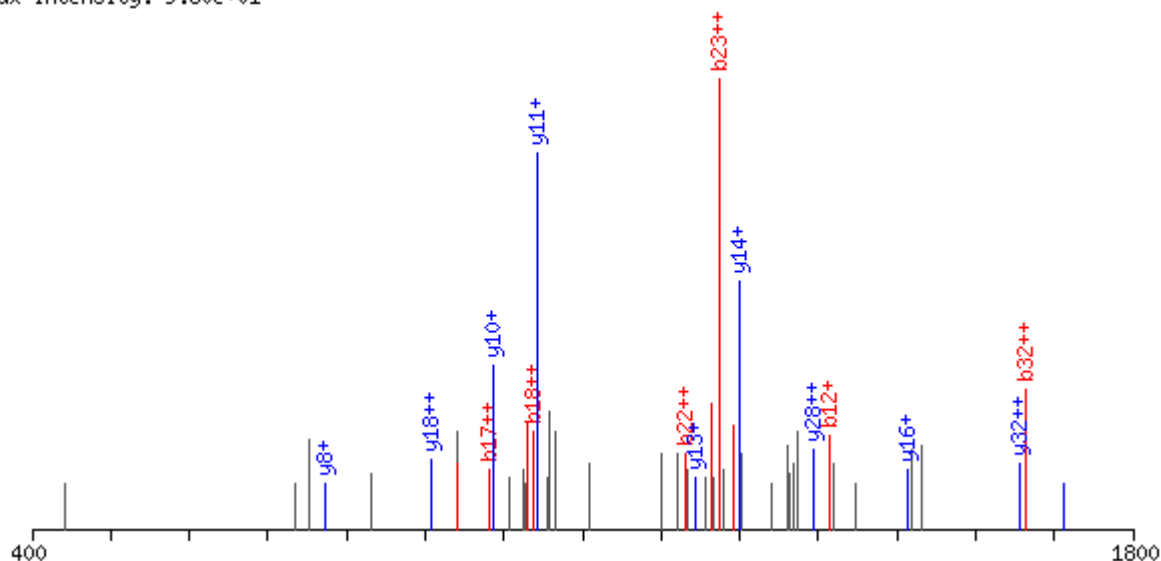

|   |    | b+      | -H2O    | b++     | -H2O    | y+      | -H2O    | -NH3    | y++     | -H2O    | -NH3    |    |   |
|---|----|---------|---------|---------|---------|---------|---------|---------|---------|---------|---------|----|---|
| F | 1  | 148.08  |         | 74.54   |         |         |         |         |         |         |         | 34 | F |
| E | 2  | 277.12  | 259.11  | 139.06  | 130.06  | 3437.55 | 3419.54 | 3420.53 | 1719.28 | 1710.28 | 1710.77 | 33 | E |
| S | 3  | 444.12  | 426.11  | 222.56  | 213.56  | 3308.51 | 3290.50 | 3291.49 | 1654.76 | 1645.75 | 1646.25 | 32 | S |
| V | 4  | 543.19  | 525.17  | 272.10  | 263.09  | 3141.51 | 3123.50 | 3124.49 | 1571.26 | 1562.25 | 1562.75 | 31 | V |
| A | 5  | 614.22  | 596.21  | 307.61  | 298.61  | 3042.44 | 3024.43 | 3025.42 | 1521.73 | 1512.72 | 1513.21 | 30 | A |
| W | 6  | 800.30  | 782.29  | 400.65  | 391.65  | 2971.41 | 2953.40 | 2954.38 | 1486.21 | 1477.20 | 1477.69 | 29 | W |
| S | 7  | 887.33  | 869.32  | 444.17  | 435.17  | 2785.33 | 2767.32 | 2768.30 | 1393.17 | 1384.16 | 1384.65 | 28 | S |
| A | 8  | 958.37  | 940.36  | 479.69  | 470.68  | 2698.30 | 2680.29 | 2681.27 | 1349.65 | 1340.65 | 1341.14 | 27 | A |
| S | 9  | 1045.40 | 1027.39 | 523.20  | 514.20  | 2627.26 | 2609.25 | 2610.23 | 1314.13 | 1305.13 | 1305.62 | 26 | S |
| A | 10 | 1116.44 | 1098.43 | 558.72  | 549.72  | 2540.23 | 2522.22 | 2523.20 | 1270.62 | 1261.61 | 1262.10 | 25 | A |
| C | 11 | 1276.47 | 1258.46 | 638.74  | 629.73  | 2469.19 | 2451.18 | 2452.16 | 1235.10 | 1226.09 | 1226.59 | 24 | C |
| H | 12 | 1413.53 | 1395.52 | 707.27  | 698.26  | 2309.16 | 2291.15 | 2292.13 | 1155.08 | 1146.08 | 1146.57 | 23 | H |
| D | 13 | 1528.56 | 1510.55 | 764.78  | 755.78  | 2172.10 | 2154.09 | 2155.07 | 1086.55 | 1077.55 | 1078.04 | 22 | D |
| G | 14 | 1585.58 | 1567.57 | 793.29  | 784.29  | 2057.07 | 2039.06 | 2040.05 | 1029.04 | 1020.04 | 1020.53 | 21 | G |
| M | 15 | 1716.62 | 1698.61 | 858.81  | 849.81  | 2000.05 | 1982.04 | 1983.03 | 1000.53 | 991.52  | 992.02  | 20 | M |
| G | 16 | 1773.64 | 1755.63 | 887.32  | 878.32  | 1869.01 | 1851.00 | 1851.99 | 935.01  | 926.00  | 926.50  | 19 | G |
| W | 17 | 1959.72 | 1941.71 | 980.36  | 971.36  | 1811.99 | 1793.98 | 1794.96 | 906.50  | 897.49  | 897.99  | 18 | W |
| L | 18 | 2072.80 | 2054.79 | 1036.91 | 1027.90 | 1625.91 | 1607.90 | 1608.88 | 813.46  | 804.45  | 804.95  | 17 | L |
| T | 19 | 2173.85 | 2155.84 | 1087.43 | 1078.42 | 1512.83 | 1494.82 | 1495.80 | 756.92  | 747.91  | 748.40  | 16 | T |
| I | 20 | 2286.93 | 2268.92 | 1143.97 | 1134.97 | 1411.78 | 1393.77 | 1394.75 | 706.39  | 697.39  | 697.88  | 15 | I |
| G | 21 | 2343.96 | 2325.95 | 1172.48 | 1163.48 | 1298.70 | 1280.68 | 1281.67 | 649.85  | 640.85  | 641.34  | 14 | G |
| I | 22 | 2457.04 | 2439.03 | 1229.02 | 1220.02 | 1241.67 | 1223.66 | 1224.65 | 621.34  | 612.34  | 612.83  | 13 | I |
| S | 23 | 2544.07 | 2526.06 | 1272.54 | 1263.53 | 1128.59 | 1110.58 | 1111.56 | 564.80  | 555.79  | 556.29  | 12 | S |
| G | 24 | 2601.09 | 2583.08 | 1301.05 | 1292.05 | 1041.56 | 1023.55 | 1024.53 | 521.28  | 512.28  | 512.77  | 11 | G |
| P | 25 | 2698.15 | 2680.14 | 1349.58 | 1340.57 | 984.54  | 966.53  | 967.51  | 492.77  | 483.77  | 484.26  | 10 | P |
| D | 26 | 2813.17 | 2795.16 | 1407.09 | 1398.09 | 887.48  | 869.47  | 870.46  | 444.25  | 435.24  | 435.73  | 9  | D |
| D | 27 | 2928.20 | 2910.19 | 1464.60 | 1455.60 | 772.46  | 754.45  | 755.43  | 386.73  | 377.73  | 378.22  | 8  | D |
| G | 28 | 2985.22 | 2967.21 | 1493.11 | 1484.11 | 657.43  |         | 640.40  | 329.22  |         | 320.71  | 7  | G |
| A | 29 | 3056.26 | 3038.25 | 1528.63 | 1519.63 | 600.41  |         | 583.38  | 300.71  |         | 292.19  | 6  | A |

|   |    | <b>b+</b> | <b>-H2O</b> | <b>b++</b> | <b>-H2O</b> | <b>y+</b> | <b>-H2O</b> | <b>-NH3</b> | <b>y++</b> | <b>-H2O</b> | <b>-NH3</b> |   |   |
|---|----|-----------|-------------|------------|-------------|-----------|-------------|-------------|------------|-------------|-------------|---|---|
| V | 30 | 3155.33   | 3137.32     | 1578.17    | 1569.16     | 529.37    |             | 512.34      | 265.19     |             | 256.68      | 5 | V |
| A | 31 | 3226.36   | 3208.35     | 1613.69    | 1604.68     | 430.30    |             | 413.28      | 215.65     |             | 207.14      | 4 | A |
| V | 32 | 3325.43   | 3307.42     | 1663.22    | 1654.21     | 359.27    |             | 342.24      | 180.14     |             | 171.62      | 3 | V |
| L | 33 | 3438.52   | 3420.51     | 1719.76    | 1710.76     | 260.20    |             | 243.17      | 130.60     |             | 122.09      | 2 | L |
| K | 34 |           |             |            |             | 147.11    |             | 130.09      | 74.06      |             | 65.55       | 1 | K |

WSN M1 1-21 unmodified

## MSLLTEVETYVLSIVPSGPLK

Charge: 2, Exp. m/z: 1138.630, Calc. m/z: 1138.627

Data File: B110818\_003, Scans: 1973 - 1973

Max Intensity: 1.08e+03

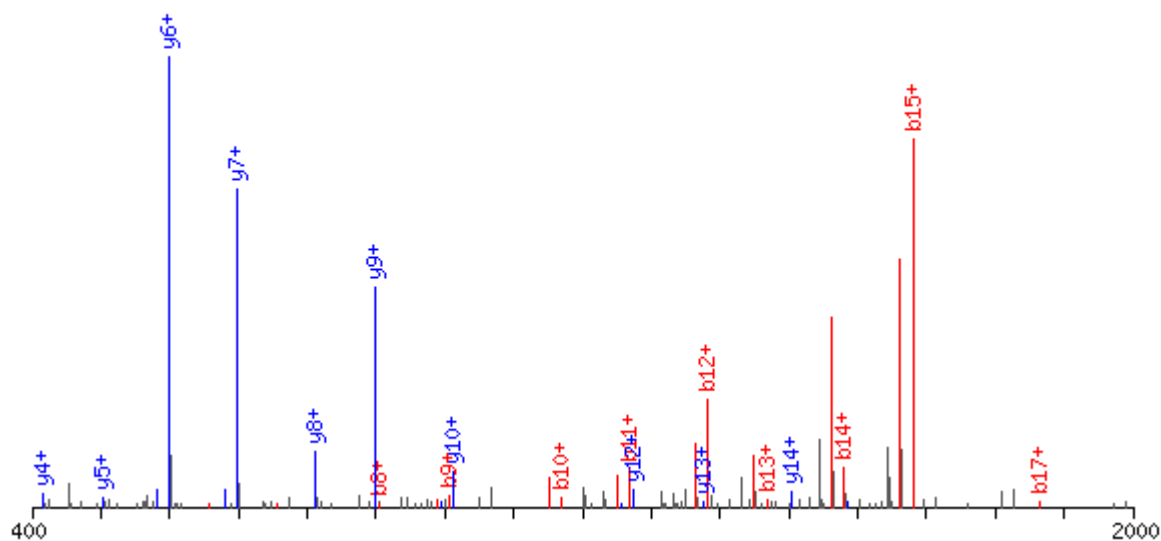

|   |    | b+      | -H2O    | y+      | -H2O    | -NH3    |    |   |
|---|----|---------|---------|---------|---------|---------|----|---|
| M | 1  | 132.05  |         |         |         |         | 21 | M |
| S | 2  | 219.08  | 201.07  | 2145.21 | 2127.19 | 2128.18 | 20 | S |
| L | 3  | 332.16  | 314.15  | 2058.17 | 2040.16 | 2041.15 | 19 | L |
| L | 4  | 445.25  | 427.24  | 1945.09 | 1927.08 | 1928.06 | 18 | L |
| T | 5  | 546.30  | 528.29  | 1832.01 | 1813.99 | 1814.98 | 17 | T |
| E | 6  | 675.34  | 657.33  | 1730.96 | 1712.95 | 1713.93 | 16 | E |
| V | 7  | 774.41  | 756.40  | 1601.91 | 1583.90 | 1584.89 | 15 | V |
| E | 8  | 903.45  | 885.44  | 1502.85 | 1484.84 | 1485.82 | 14 | E |
| T | 9  | 1004.50 | 986.49  | 1373.80 | 1355.79 | 1356.78 | 13 | T |
| Y | 10 | 1167.56 | 1149.55 | 1272.76 | 1254.75 | 1255.73 | 12 | Y |
| V | 11 | 1266.63 | 1248.62 | 1109.69 | 1091.68 | 1092.67 | 11 | V |
| L | 12 | 1379.71 | 1361.70 | 1010.62 | 992.61  | 993.60  | 10 | L |
| S | 13 | 1466.74 | 1448.73 | 897.54  | 879.53  | 880.51  | 9  | S |
| I | 14 | 1579.83 | 1561.82 | 810.51  | 792.50  | 793.48  | 8  | I |
| V | 15 | 1678.90 | 1660.89 | 697.42  | 679.41  | 680.40  | 7  | V |
| P | 16 | 1775.95 | 1757.94 | 598.36  | 580.35  | 581.33  | 6  | P |
| S | 17 | 1862.98 | 1844.97 | 501.30  | 483.29  | 484.28  | 5  | S |
| G | 18 | 1920.00 | 1901.99 | 414.27  |         | 397.24  | 4  | G |
| P | 19 | 2017.06 | 1999.05 | 357.25  |         | 340.22  | 3  | P |
| L | 20 | 2130.14 | 2112.13 | 260.20  |         | 243.17  | 2  | L |
| K | 21 |         |         | 147.11  |         | 130.09  | 1  | K |

WSN M1 2-21 Met Loss

LLTEVETYVLSIVPSGPLK

Charge: 2, Exp. m/z: 1073.110, Calc. m/z: 1073.107  
 Data File: B110818\_003, Scans: 1943 - 1943

Max Intensity: 3.84e+03

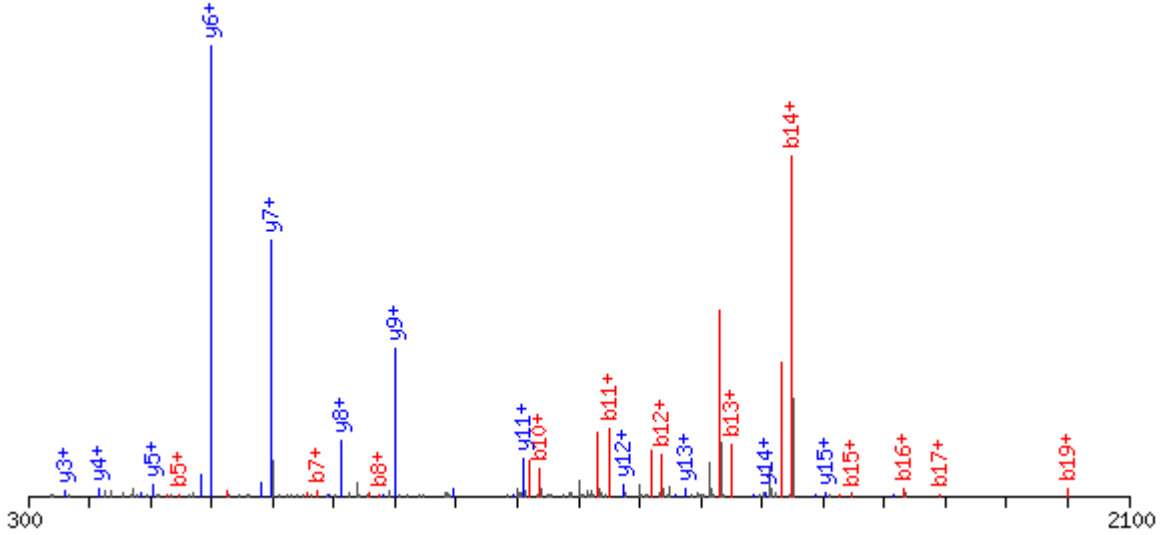

|   |    | b+      | -H2O    | y+      | -H2O    | -NH3    |    |   |
|---|----|---------|---------|---------|---------|---------|----|---|
| S | 1  | 88.04   | 70.03   |         |         |         | 20 | S |
| L | 2  | 201.12  | 183.11  | 2058.17 | 2040.16 | 2041.15 | 19 | L |
| L | 3  | 314.21  | 296.20  | 1945.09 | 1927.08 | 1928.06 | 18 | L |
| T | 4  | 415.26  | 397.24  | 1832.01 | 1813.99 | 1814.98 | 17 | T |
| E | 5  | 544.30  | 526.29  | 1730.96 | 1712.95 | 1713.93 | 16 | E |
| V | 6  | 643.37  | 625.36  | 1601.91 | 1583.90 | 1584.89 | 15 | V |
| E | 7  | 772.41  | 754.40  | 1502.85 | 1484.84 | 1485.82 | 14 | E |
| T | 8  | 873.46  | 855.45  | 1373.80 | 1355.79 | 1356.78 | 13 | T |
| Y | 9  | 1036.52 | 1018.51 | 1272.76 | 1254.75 | 1255.73 | 12 | Y |
| V | 10 | 1135.59 | 1117.58 | 1109.69 | 1091.68 | 1092.67 | 11 | V |
| L | 11 | 1248.67 | 1230.66 | 1010.62 | 992.61  | 993.60  | 10 | L |
| S | 12 | 1335.70 | 1317.69 | 897.54  | 879.53  | 880.51  | 9  | S |
| I | 13 | 1448.79 | 1430.78 | 810.51  | 792.50  | 793.48  | 8  | I |
| V | 14 | 1547.86 | 1529.85 | 697.42  | 679.41  | 680.40  | 7  | V |
| P | 15 | 1644.91 | 1626.90 | 598.36  | 580.35  | 581.33  | 6  | P |
| S | 16 | 1731.94 | 1713.93 | 501.30  | 483.29  | 484.28  | 5  | S |
| G | 17 | 1788.96 | 1770.95 | 414.27  |         | 397.24  | 4  | G |
| P | 18 | 1886.02 | 1868.01 | 357.25  |         | 340.22  | 3  | P |
| L | 19 | 1999.10 | 1981.09 | 260.20  |         | 243.17  | 2  | L |
| K | 20 |         |         | 147.11  |         | 130.09  | 1  | K |

WSN M1 2-21 phospho

## SLLT(+79.97)EVETYVLSIVPSGPLK

Charge: 2, Exp. m/z: 1113.090, Calc. m/z: 1113.087

Data File: B110818\_013, Scans: 2321 - 2321

Max Intensity: 1.67e+03

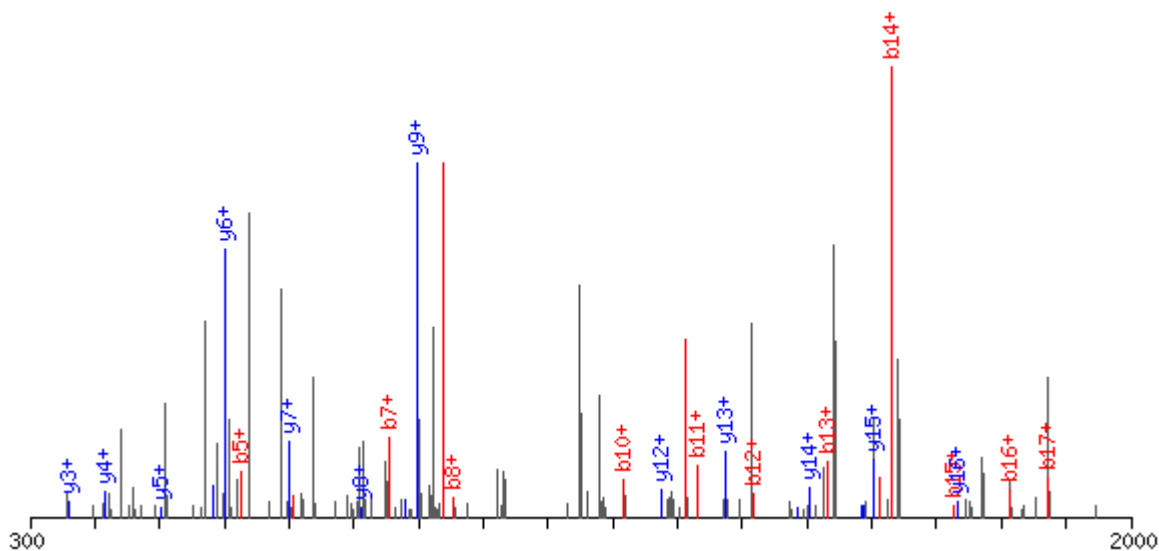

|   |    | b+      | -H2O    | y+      | -H2O    | -NH3    |    |   |
|---|----|---------|---------|---------|---------|---------|----|---|
| S | 1  | 88.04   | 70.03   |         |         |         | 20 | S |
| L | 2  | 201.12  | 183.11  | 2138.14 | 2120.13 | 2121.11 | 19 | L |
| L | 3  | 314.21  | 296.20  | 2025.06 | 2007.04 | 2008.03 | 18 | L |
| I | 4  | 495.22  | 477.21  | 1911.97 | 1893.96 | 1894.94 | 17 | I |
| E | 5  | 624.26  | 606.25  | 1730.96 | 1712.95 | 1713.93 | 16 | E |
| V | 6  | 723.33  | 705.32  | 1601.91 | 1583.90 | 1584.89 | 15 | V |
| E | 7  | 852.38  | 834.36  | 1502.85 | 1484.84 | 1485.82 | 14 | E |
| T | 8  | 953.42  | 935.41  | 1373.80 | 1355.79 | 1356.78 | 13 | T |
| Y | 9  | 1116.49 | 1098.48 | 1272.76 | 1254.75 | 1255.73 | 12 | Y |
| V | 10 | 1215.55 | 1197.54 | 1109.69 | 1091.68 | 1092.67 | 11 | V |
| L | 11 | 1328.64 | 1310.63 | 1010.62 | 992.61  | 993.60  | 10 | L |
| S | 12 | 1415.67 | 1397.66 | 897.54  | 879.53  | 880.51  | 9  | S |
| I | 13 | 1528.75 | 1510.74 | 810.51  | 792.50  | 793.48  | 8  | I |
| V | 14 | 1627.82 | 1609.81 | 697.42  | 679.41  | 680.40  | 7  | V |
| P | 15 | 1724.88 | 1706.87 | 598.36  | 580.35  | 581.33  | 6  | P |
| S | 16 | 1811.91 | 1793.90 | 501.30  | 483.29  | 484.28  | 5  | S |
| G | 17 | 1868.93 | 1850.92 | 414.27  |         | 397.24  | 4  | G |
| P | 18 | 1965.98 | 1947.97 | 357.25  |         | 340.22  | 3  | P |
| L | 19 | 2079.07 | 2061.06 | 260.20  |         | 243.17  | 2  | L |
| K | 20 |         |         | 147.11  |         | 130.09  | 1  | K |

WSN M1 2-21 phospho

SLLTEVETY(+79.97)VLSIVPSGPLKAEIAQR

Charge: 3, Exp. m/z: 965.183, Calc. m/z: 965.181  
 Data File: B110818\_008, Scans: 2228 - 2228

Max Intensity: 1.34e+04

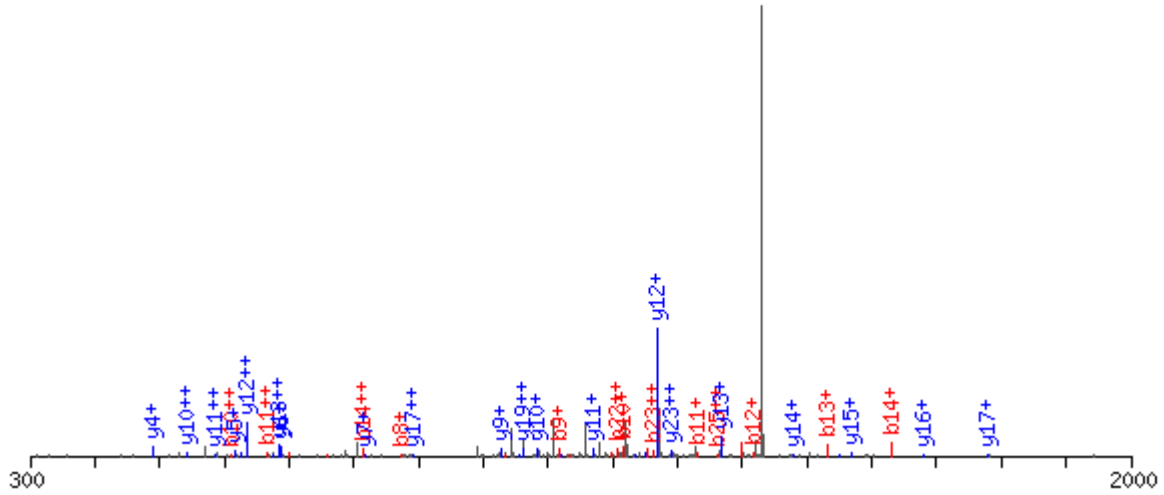

[Hiding fragment losses - Click to Show](#)

|   |    | b+      | b++     | y+      | y++     |    |   |
|---|----|---------|---------|---------|---------|----|---|
| S | 1  | 88.04   | 44.52   |         |         | 26 | S |
| L | 2  | 201.12  | 101.07  | 2806.50 | 1403.75 | 25 | L |
| L | 3  | 314.21  | 157.61  | 2693.42 | 1347.21 | 24 | L |
| T | 4  | 415.26  | 208.13  | 2580.33 | 1290.67 | 23 | T |
| E | 5  | 544.30  | 272.65  | 2479.28 | 1240.15 | 22 | E |
| V | 6  | 643.37  | 322.19  | 2350.24 | 1175.62 | 21 | V |
| E | 7  | 772.41  | 386.71  | 2251.17 | 1126.09 | 20 | E |
| T | 8  | 873.46  | 437.23  | 2122.13 | 1061.57 | 19 | T |
| Y | 9  | 1116.49 | 558.75  | 2021.08 | 1011.05 | 18 | Y |
| V | 10 | 1215.55 | 608.28  | 1778.05 | 889.53  | 17 | V |
| L | 11 | 1328.64 | 664.82  | 1678.99 | 840.00  | 16 | L |
| S | 12 | 1415.67 | 708.34  | 1565.90 | 783.45  | 15 | S |
| I | 13 | 1528.75 | 764.88  | 1478.87 | 739.94  | 14 | I |
| V | 14 | 1627.82 | 814.42  | 1365.78 | 683.40  | 13 | V |
| P | 15 | 1724.88 | 862.94  | 1266.72 | 633.86  | 12 | P |
| S | 16 | 1811.91 | 906.46  | 1169.66 | 585.34  | 11 | S |
| G | 17 | 1868.93 | 934.97  | 1082.63 | 541.82  | 10 | G |
| P | 18 | 1965.98 | 983.49  | 1025.61 | 513.31  | 9  | P |
| L | 19 | 2079.07 | 1040.04 | 928.56  | 464.78  | 8  | L |
| K | 20 | 2207.16 | 1104.08 | 815.47  | 408.24  | 7  | K |
| A | 21 | 2278.20 | 1139.60 | 687.38  | 344.19  | 6  | A |
| E | 22 | 2407.24 | 1204.12 | 616.34  | 308.67  | 5  | E |
| I | 23 | 2520.32 | 1260.67 | 487.30  | 244.15  | 4  | I |
| A | 24 | 2591.36 | 1296.18 | 374.21  | 187.61  | 3  | A |
| Q | 25 | 2719.42 | 1360.21 | 303.18  | 152.09  | 2  | Q |
| R | 26 |         |         | 175.12  | 88.06   | 1  | R |



WSN M1 105-113 unmodified

## REITFHGAK

Charge: 3, Exp. m/z: 353.531, Calc. m/z: 353.531

Data File: B111019\_043, Scans: 541 - 541

Max Intensity: 1.00e+05

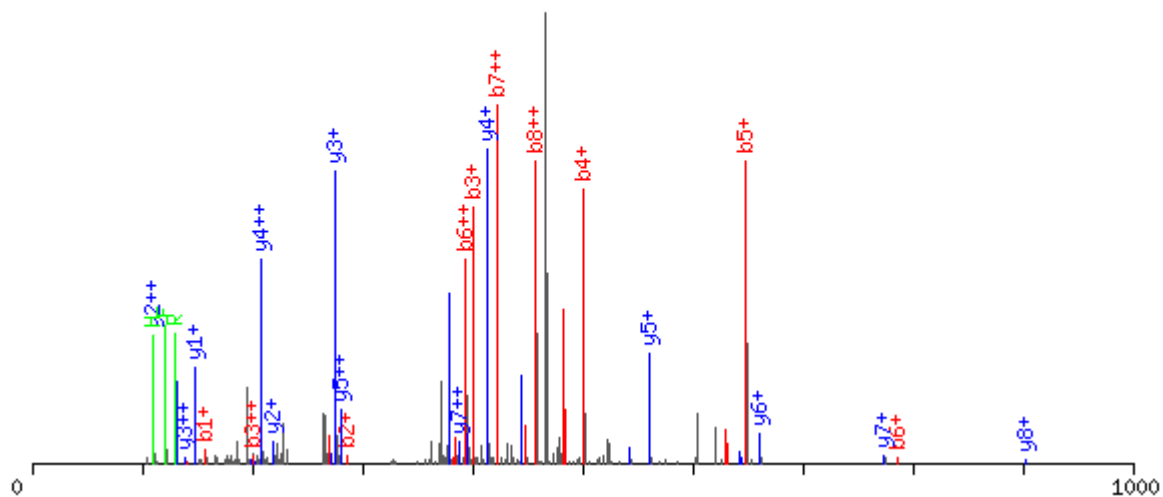[Hiding fragment losses - Click to Show](#)

|   |   | b+     | b++    | y+     | y++    |   |   |
|---|---|--------|--------|--------|--------|---|---|
| R | 1 | 157.11 | 79.06  |        |        | 9 | R |
| E | 2 | 286.15 | 143.58 | 902.47 | 451.74 | 8 | E |
| I | 3 | 399.24 | 200.12 | 773.43 | 387.22 | 7 | I |
| T | 4 | 500.28 | 250.65 | 660.35 | 330.68 | 6 | T |
| F | 5 | 647.35 | 324.18 | 559.30 | 280.15 | 5 | F |
| H | 6 | 784.41 | 392.71 | 412.23 | 206.62 | 4 | H |
| G | 7 | 841.43 | 421.22 | 275.17 | 138.09 | 3 | G |
| A | 8 | 912.47 | 456.74 | 218.15 | 109.58 | 2 | A |
| K | 9 |        |        | 147.11 | 74.06  | 1 | K |

WSN M1 pT108

# MASCOT SCIENCE Mascot Search Results

## Peptide View

MS/MS Fragmentation of **EITFHGAK**

Found in **M1**, Predicted proteins of Fodor Group RG strain of A/WSN/33

Match to Query 270: 981.433948 from(491.724250,2+)

Title: Elution from: 13.180 to 13.180 period: 0 experiment: 1 cycles: 1 precIntensity: 1179405.0

FinneganScanNumber: 423 MStype: enumIsNormalMS rawFile: B110609\_010.RAW

Data file file1\_B110609\_010.mgf

Click mouse within plot area to zoom in by factor of two about that point

Or, Plot from  to  Da

Label all possible matches  Label matches used for scoring

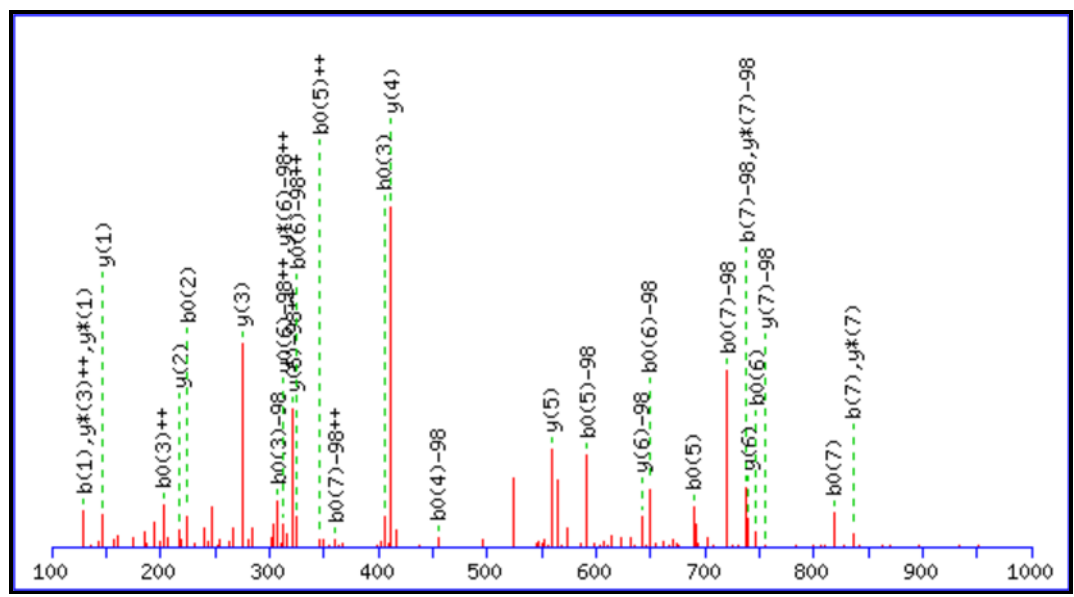

Monoisotopic mass of neutral peptide  $M_r(\text{calc})$ : 981.4321

Fixed modifications: Carbamidomethyl (C) (apply to specified residues or termini only)

Variable modifications:

T3 : Phospho (ST), with neutral losses 97.9769 (shown in table), 0.0000

Ions Score: 26 Expect: 0.088

Matches : 32/92 fragment ions using 47 most intense peaks ([help](#))

| # | b        | b <sup>++</sup> | b <sup>0</sup> | b <sup>0++</sup> | Seq. | y        | y <sup>++</sup> | y <sup>*</sup> | y <sup>*++</sup> | y <sup>0</sup> | y <sup>0++</sup> | # |
|---|----------|-----------------|----------------|------------------|------|----------|-----------------|----------------|------------------|----------------|------------------|---|
| 1 | 130.0499 | 65.5286         | 112.0393       | 56.5233          | E    |          |                 |                |                  |                |                  | 8 |
| 2 | 243.1339 | 122.0706        | 225.1234       | 113.0653         | I    | 755.4199 | 378.2136        | 738.3933       | 369.7003         | 737.4093       | 369.2083         | 7 |
| 3 | 326.1710 | 163.5892        | 308.1605       | 154.5839         | T    | 642.3358 | 321.6715        | 625.3093       | 313.1583         | 624.3253       | 312.6663         | 6 |
| 4 | 473.2395 | 237.1234        | 455.2289       | 228.1181         | F    | 559.2987 | 280.1530        | 542.2722       | 271.6397         |                |                  | 5 |
| 5 | 610.2984 | 305.6528        | 592.2878       | 296.6475         | H    | 412.2303 | 206.6188        | 395.2037       | 198.1055         |                |                  | 4 |
| 6 | 667.3198 | 334.1636        | 649.3093       | 325.1583         | G    | 275.1714 | 138.0893        | 258.1448       | 129.5761         |                |                  | 3 |
| 7 | 738.3570 | 369.6821        | 720.3464       | 360.6768         | A    | 218.1499 | 109.5786        | 201.1234       | 101.0653         |                |                  | 2 |
| 8 |          |                 |                |                  | K    | 147.1128 | 74.0600         | 130.0863       | 65.5468          |                |                  | 1 |

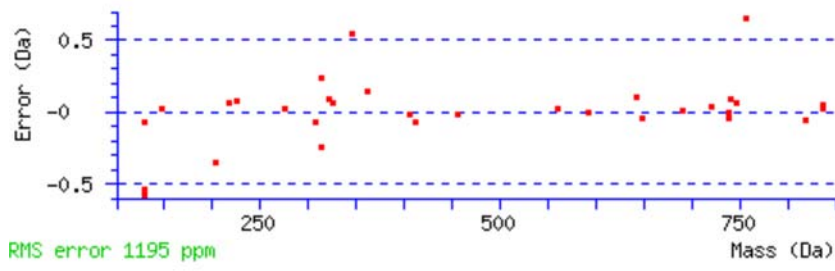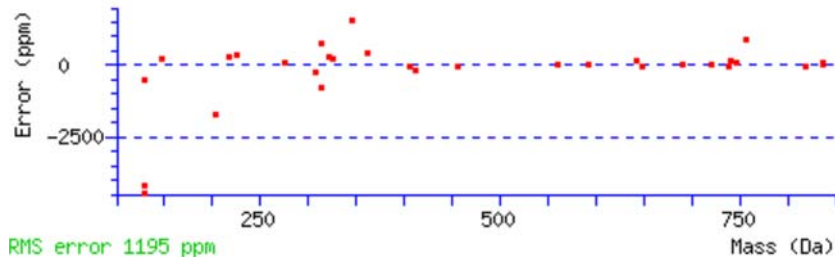

NCBI **BLAST** search of [EITFHGAK](#)

(Parameters: blastp, nr protein database, expect=20000, no filter, PAM30)

Other BLAST [web gateways](#)

**All matches to this query**

| Score | Mr(calc): | Delta   | Sequence                  |
|-------|-----------|---------|---------------------------|
| 26.1  | 981.4321  | 0.0019  | <a href="#">EITFHGAK</a>  |
| 13.9  | 981.4168  | 0.0171  | <a href="#">ELSPGSGQK</a> |
| 10.3  | 981.4532  | -0.0193 | <a href="#">QLSQLGQK</a>  |
| 9.3   | 981.4532  | -0.0193 | <a href="#">QSTLPTQK</a>  |
| 8.5   | 981.4532  | -0.0193 | <a href="#">QSTLPTQK</a>  |
| 8.5   | 981.4532  | -0.0193 | <a href="#">QSTLPTQK</a>  |
| 7.1   | 981.4420  | -0.0080 | <a href="#">LEPSDITK</a>  |
| 6.9   | 981.4168  | 0.0171  | <a href="#">ELSPGSGQK</a> |
| 6.6   | 981.4412  | -0.0072 | <a href="#">MNEWMKK</a>   |
| 6.2   | 981.4532  | -0.0193 | <a href="#">QLSQLGQK</a>  |

**Mascot:** <http://www.matrixscience.com/>

WSN M1 164-174 unmodified

## QMVTTTNPLIR

Charge: 2, Exp. m/z: 637.350, Calc. m/z: 637.352

Data File: B110609\_017, Scans: 1464 - 1464

Max Intensity: 1.76e+04

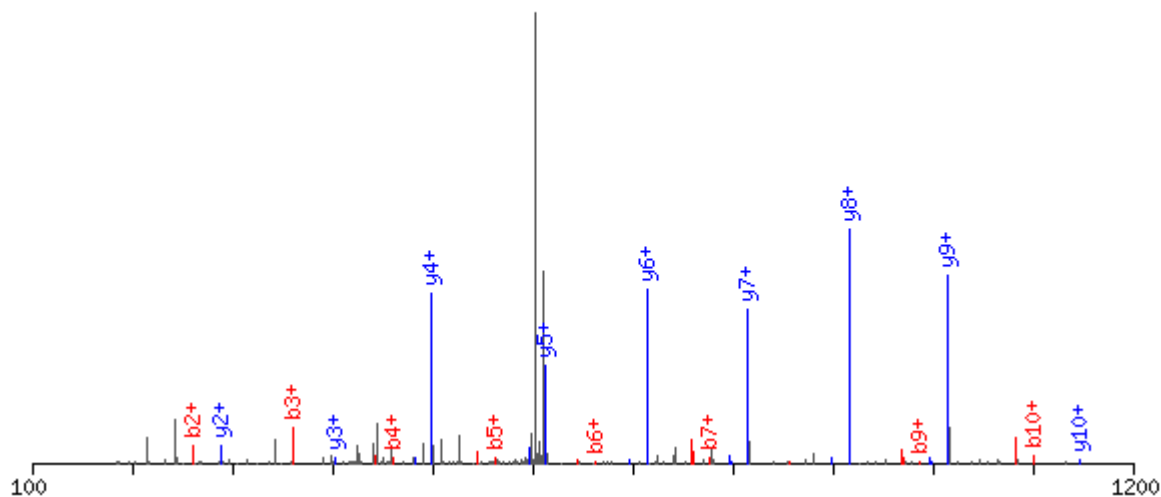

|   |    | b+      | -H2O    | -NH3    | y+      | -H2O    | -NH3    |    |   |
|---|----|---------|---------|---------|---------|---------|---------|----|---|
| Q | 1  | 129.07  |         |         |         |         |         | 11 | Q |
| M | 2  | 260.11  |         |         | 1145.63 | 1127.62 | 1128.61 | 10 | M |
| V | 3  | 359.17  |         |         | 1014.59 | 996.58  | 997.57  | 9  | V |
| T | 4  | 460.22  | 442.21  |         | 915.53  | 897.52  | 898.50  | 8  | T |
| T | 5  | 561.27  | 543.26  |         | 814.48  | 796.47  | 797.45  | 7  | T |
| T | 6  | 662.32  | 644.31  |         | 713.43  | 695.42  | 696.40  | 6  | T |
| N | 7  | 776.36  | 758.35  | 759.33  | 612.38  |         | 595.36  | 5  | N |
| P | 8  | 873.41  | 855.40  | 856.39  | 498.34  |         | 481.31  | 4  | P |
| L | 9  | 986.50  | 968.49  | 969.47  | 401.29  |         | 384.26  | 3  | L |
| I | 10 | 1099.58 | 1081.57 | 1082.56 | 288.20  |         | 271.18  | 2  | I |
| R | 11 |         |         |         | 175.12  |         | 158.09  | 1  | R |

WSN M1 164-174 phospho

QMVTTT(+79.97)NPLIR

Charge: 2, Exp. m/z: 677.334, Calc. m/z: 677.332

Data File: B110609\_010, Scans: 758 - 758

Max Intensity: 1.93e+03

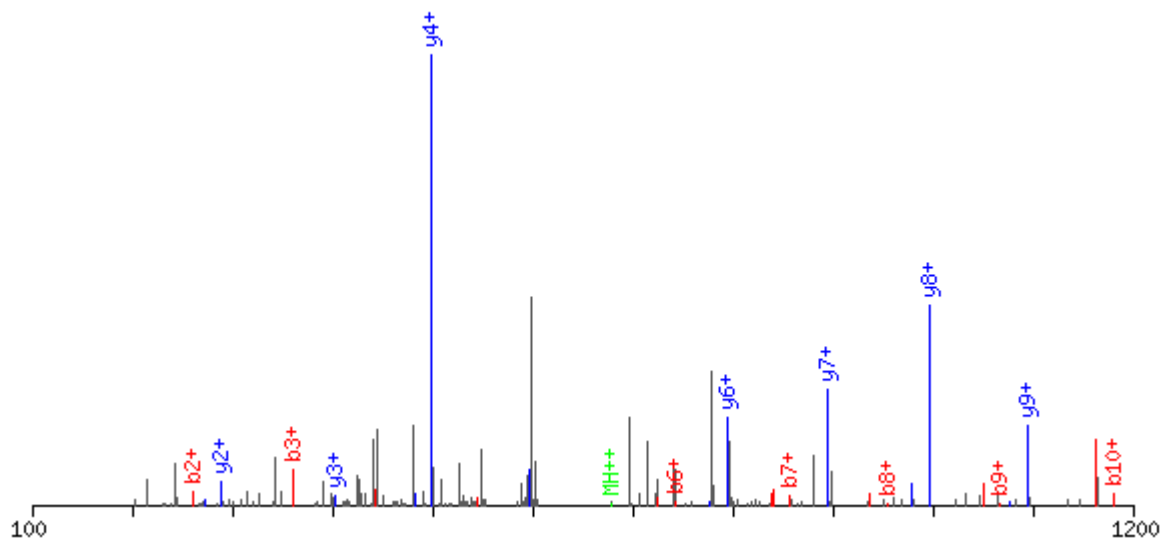

|   |    | b+      | -H2O    | -NH3    | y+      | -H2O    | -NH3    |    |   |
|---|----|---------|---------|---------|---------|---------|---------|----|---|
| Q | 1  | 129.07  |         |         |         |         |         | 11 | Q |
| M | 2  | 260.11  |         |         | 1225.60 | 1207.59 | 1208.57 | 10 | M |
| V | 3  | 359.17  |         |         | 1094.56 | 1076.55 | 1077.53 | 9  | V |
| T | 4  | 460.22  | 442.21  |         | 995.49  | 977.48  | 978.47  | 8  | T |
| T | 5  | 561.27  | 543.26  |         | 894.44  | 876.43  | 877.42  | 7  | T |
| I | 6  | 742.28  | 724.27  |         | 793.40  | 775.39  | 776.37  | 6  | I |
| N | 7  | 856.33  | 838.32  | 839.30  | 612.38  |         | 595.36  | 5  | N |
| P | 8  | 953.38  | 935.37  | 936.35  | 498.34  |         | 481.31  | 4  | P |
| L | 9  | 1066.46 | 1048.45 | 1049.44 | 401.29  |         | 384.26  | 3  | L |
| I | 10 | 1179.55 | 1161.54 | 1162.52 | 288.20  |         | 271.18  | 2  | I |
| R | 11 |         |         |         | 175.12  |         | 158.09  | 1  | R |

WSN M1 188-210 unmodified

## AMEQMAGSSEQAAEAMDIASQAR

Charge: 2, Exp. m/z: 1192.020, Calc. m/z: 1192.017

Data File: B110609\_017, Scans: 1435 - 1435

Max Intensity: 1.23e+02

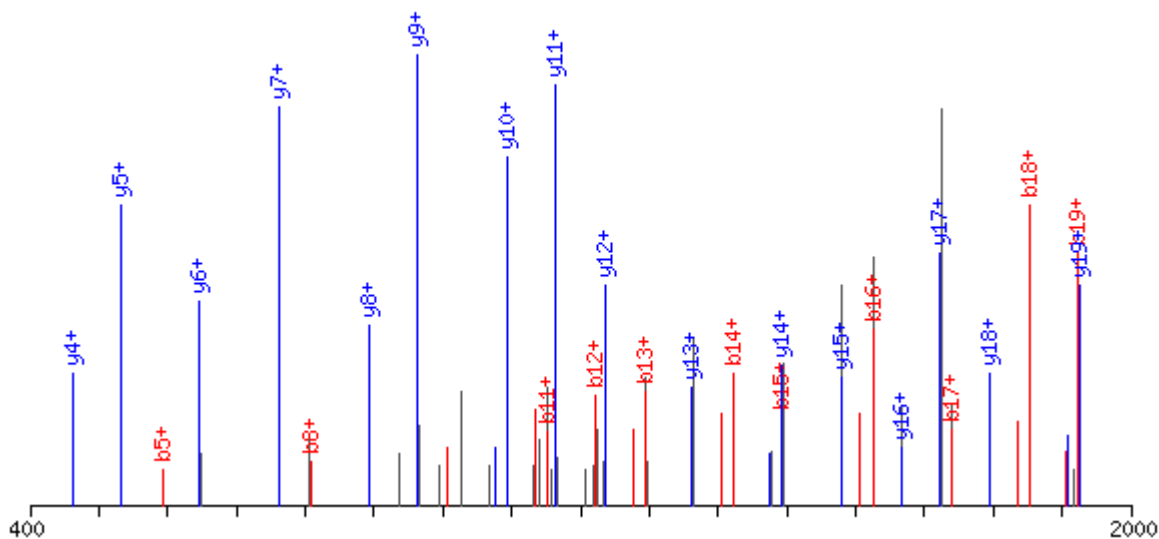

|   |    | b+      | -H2O    | y+      | -H2O    | -NH3    |    |   |
|---|----|---------|---------|---------|---------|---------|----|---|
| A | 1  | 72.04   |         |         |         |         | 23 | A |
| M | 2  | 203.08  |         | 2312.00 | 2293.98 | 2294.97 | 22 | M |
| E | 3  | 332.13  | 314.12  | 2180.95 | 2162.94 | 2163.93 | 21 | E |
| Q | 4  | 460.19  | 442.18  | 2051.91 | 2033.90 | 2034.89 | 20 | Q |
| M | 5  | 591.23  | 573.22  | 1923.85 | 1905.84 | 1906.83 | 19 | M |
| A | 6  | 662.26  | 644.25  | 1792.81 | 1774.80 | 1775.79 | 18 | A |
| G | 7  | 719.29  | 701.27  | 1721.78 | 1703.77 | 1704.75 | 17 | G |
| S | 8  | 806.32  | 788.31  | 1664.75 | 1646.74 | 1647.73 | 16 | S |
| S | 9  | 893.35  | 875.34  | 1577.72 | 1559.71 | 1560.70 | 15 | S |
| E | 10 | 1022.39 | 1004.38 | 1490.69 | 1472.68 | 1473.66 | 14 | E |
| Q | 11 | 1150.45 | 1132.44 | 1361.65 | 1343.64 | 1344.62 | 13 | Q |
| A | 12 | 1221.49 | 1203.48 | 1233.59 | 1215.58 | 1216.56 | 12 | A |
| A | 13 | 1292.52 | 1274.51 | 1162.55 | 1144.54 | 1145.53 | 11 | A |
| E | 14 | 1421.57 | 1403.56 | 1091.51 | 1073.50 | 1074.49 | 10 | E |
| A | 15 | 1492.60 | 1474.59 | 962.47  | 944.46  | 945.45  | 9  | A |
| M | 16 | 1623.64 | 1605.63 | 891.44  | 873.42  | 874.41  | 8  | M |
| D | 17 | 1738.67 | 1720.66 | 760.39  | 742.38  | 743.37  | 7  | D |
| I | 18 | 1851.76 | 1833.75 | 645.37  | 627.36  | 628.34  | 6  | I |
| A | 19 | 1922.79 | 1904.78 | 532.28  | 514.27  | 515.26  | 5  | A |
| S | 20 | 2009.82 | 1991.81 | 461.25  | 443.24  | 444.22  | 4  | S |
| Q | 21 | 2137.88 | 2119.87 | 374.21  |         | 357.19  | 3  | Q |
| A | 22 | 2208.92 | 2190.91 | 246.16  |         | 229.13  | 2  | A |
| R | 23 |         |         | 175.12  |         | 158.09  | 1  | R |

## WSN M1 188-210 phospho

## AMEQMAGS(+79.97)SEQAAEAMDIASQAR

Charge: 3, Exp. m/z: 821.672, Calc. m/z: 821.671

Data File: B110318\_003, Scans: 940 - 940

Max Intensity: 2.83e+02

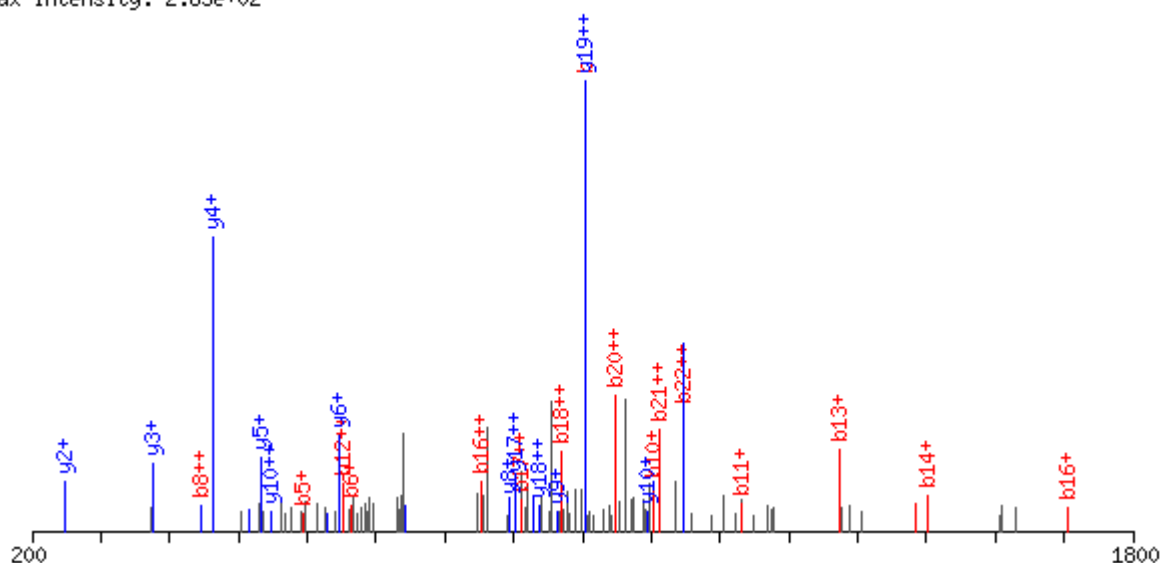

|   |    | b+      | -H2O    | b++     | -H2O    | y+      | -H2O    | -NH3    | y++     | -H2O    | -NH3    |    |   |
|---|----|---------|---------|---------|---------|---------|---------|---------|---------|---------|---------|----|---|
| A | 1  | 72.04   |         | 36.53   |         |         |         |         |         |         |         | 23 | A |
| M | 2  | 203.08  |         | 102.05  |         | 2391.96 | 2373.95 | 2374.93 | 1196.48 | 1187.48 | 1187.97 | 22 | M |
| E | 3  | 332.13  | 314.12  | 166.57  | 157.56  | 2260.92 | 2242.91 | 2243.89 | 1130.96 | 1121.96 | 1122.45 | 21 | E |
| Q | 4  | 460.19  | 442.18  | 230.60  | 221.59  | 2131.88 | 2113.87 | 2114.85 | 1066.44 | 1057.44 | 1057.93 | 20 | Q |
| M | 5  | 591.23  | 573.22  | 296.12  | 287.11  | 2003.82 | 1985.81 | 1986.79 | 1002.41 | 993.41  | 993.90  | 19 | M |
| A | 6  | 662.26  | 644.25  | 331.64  | 322.63  | 1872.78 | 1854.77 | 1855.75 | 936.89  | 927.89  | 928.38  | 18 | A |
| G | 7  | 719.29  | 701.27  | 360.15  | 351.14  | 1801.74 | 1783.73 | 1784.72 | 901.37  | 892.37  | 892.86  | 17 | G |
| S | 8  | 886.28  | 868.27  | 443.65  | 434.64  | 1744.72 | 1726.71 | 1727.69 | 872.86  | 863.86  | 864.35  | 16 | S |
| S | 9  | 973.32  | 955.30  | 487.16  | 478.16  | 1577.72 | 1559.71 | 1560.70 | 789.36  | 780.36  | 780.85  | 15 | S |
| E | 10 | 1102.36 | 1084.35 | 551.68  | 542.68  | 1490.69 | 1472.68 | 1473.66 | 745.85  | 736.84  | 737.34  | 14 | E |
| Q | 11 | 1230.42 | 1212.41 | 615.71  | 606.71  | 1361.65 | 1343.64 | 1344.62 | 681.33  | 672.32  | 672.81  | 13 | Q |
| A | 12 | 1301.45 | 1283.44 | 651.23  | 642.23  | 1233.59 | 1215.58 | 1216.56 | 617.30  | 608.29  | 608.78  | 12 | A |
| A | 13 | 1372.49 | 1354.48 | 686.75  | 677.74  | 1162.55 | 1144.54 | 1145.53 | 581.78  | 572.77  | 573.27  | 11 | A |
| E | 14 | 1501.53 | 1483.52 | 751.27  | 742.27  | 1091.51 | 1073.50 | 1074.49 | 546.26  | 537.26  | 537.75  | 10 | E |
| A | 15 | 1572.57 | 1554.56 | 786.79  | 777.78  | 962.47  | 944.46  | 945.45  | 481.74  | 472.73  | 473.23  | 9  | A |
| M | 16 | 1703.61 | 1685.60 | 852.31  | 843.30  | 891.44  | 873.42  | 874.41  | 446.22  | 437.22  | 437.71  | 8  | M |
| D | 17 | 1818.64 | 1800.63 | 909.82  | 900.82  | 760.39  | 742.38  | 743.37  | 380.70  | 371.70  | 372.19  | 7  | D |
| I | 18 | 1931.72 | 1913.71 | 966.36  | 957.36  | 645.37  | 627.36  | 628.34  | 323.19  | 314.18  | 314.67  | 6  | I |
| A | 19 | 2002.76 | 1984.75 | 1001.88 | 992.88  | 532.28  | 514.27  | 515.26  | 266.65  | 257.64  | 258.13  | 5  | A |
| S | 20 | 2089.79 | 2071.78 | 1045.40 | 1036.39 | 461.25  | 443.24  | 444.22  | 231.13  | 222.12  | 222.61  | 4  | S |
| Q | 21 | 2217.85 | 2199.84 | 1109.43 | 1100.42 | 374.21  |         | 357.19  | 187.61  |         | 179.10  | 3  | Q |
| A | 22 | 2288.89 | 2270.88 | 1144.95 | 1135.94 | 246.16  |         | 229.13  | 123.58  |         | 115.07  | 2  | A |
| R | 23 |         |         |         |         | 175.12  |         | 158.09  | 88.06   |         | 79.55   | 1  | R |

WSN M1 218-242 unmodified

## TIGTHPSSSAGLKDDLLENLQAYQK

Charge: 3, Exp. m/z: 896.126, Calc. m/z: 896.127

Data File: B110818\_003, Scans: 743 - 743

Max Intensity: 2.12e+03

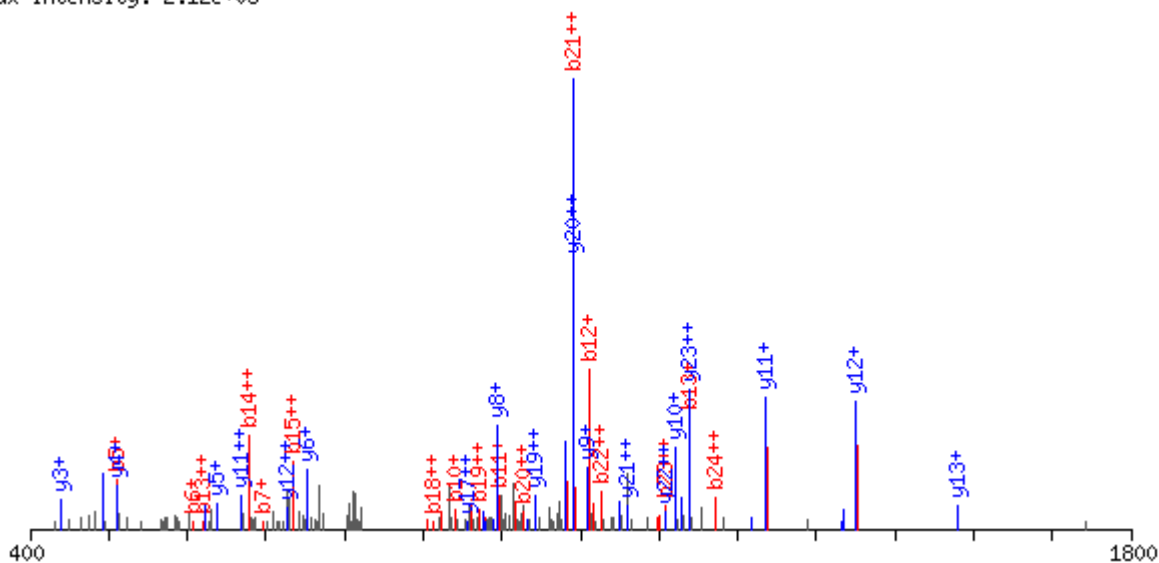

Showing fragment losses - Click to Hide

|   |    | b+      | -H2O    | -NH3    | b++     | -H2O    | -NH3    | y+      | -H2O    | -NH3    | y++     | -H2O    | -NH3    |    |   |
|---|----|---------|---------|---------|---------|---------|---------|---------|---------|---------|---------|---------|---------|----|---|
| T | 1  | 102.05  | 84.04   |         | 51.53   | 42.53   |         |         |         |         |         |         |         | 25 | T |
| I | 2  | 215.14  | 197.13  |         | 108.07  | 99.07   |         | 2585.32 | 2567.31 | 2568.29 | 1293.16 | 1284.16 | 1284.65 | 24 | I |
| G | 3  | 272.16  | 254.15  |         | 136.58  | 127.58  |         | 2472.24 | 2454.23 | 2455.21 | 1236.62 | 1227.62 | 1228.11 | 23 | G |
| T | 4  | 373.21  | 355.20  |         | 187.11  | 178.10  |         | 2415.22 | 2397.20 | 2398.19 | 1208.11 | 1199.11 | 1199.60 | 22 | T |
| H | 5  | 510.27  | 492.26  |         | 255.64  | 246.63  |         | 2314.17 | 2296.16 | 2297.14 | 1157.59 | 1148.58 | 1149.07 | 21 | H |
| P | 6  | 607.32  | 589.31  |         | 304.16  | 295.16  |         | 2177.11 | 2159.10 | 2160.08 | 1089.06 | 1080.05 | 1080.54 | 20 | P |
| S | 7  | 694.35  | 676.34  |         | 347.68  | 338.67  |         | 2080.06 | 2062.05 | 2063.03 | 1040.53 | 1031.53 | 1032.02 | 19 | S |
| S | 8  | 781.38  | 763.37  |         | 391.20  | 382.19  |         | 1993.02 | 1975.01 | 1976.00 | 997.02  | 988.01  | 988.50  | 18 | S |
| S | 9  | 868.42  | 850.41  |         | 434.71  | 425.71  |         | 1905.99 | 1887.98 | 1888.97 | 953.50  | 944.49  | 944.99  | 17 | S |
| A | 10 | 939.45  | 921.44  |         | 470.23  | 461.22  |         | 1818.96 | 1800.95 | 1801.93 | 909.98  | 900.98  | 901.47  | 16 | A |
| G | 11 | 996.47  | 978.46  |         | 498.74  | 489.74  |         | 1747.92 | 1729.91 | 1730.90 | 874.46  | 865.46  | 865.95  | 15 | G |
| L | 12 | 1109.56 | 1091.55 |         | 555.28  | 546.28  |         | 1690.90 | 1672.89 | 1673.87 | 845.95  | 836.95  | 837.44  | 14 | L |
| K | 13 | 1237.65 | 1219.64 | 1220.63 | 619.33  | 610.33  | 610.82  | 1577.82 | 1559.81 | 1560.79 | 789.41  | 780.41  | 780.90  | 13 | K |
| D | 14 | 1352.68 | 1334.67 | 1335.65 | 676.84  | 667.84  | 668.33  | 1449.72 | 1431.71 | 1432.70 | 725.36  | 716.36  | 716.85  | 12 | D |
| D | 15 | 1467.71 | 1449.70 | 1450.68 | 734.36  | 725.35  | 725.84  | 1334.70 | 1316.68 | 1317.67 | 667.85  | 658.85  | 659.34  | 11 | D |
| L | 16 | 1580.79 | 1562.78 | 1563.76 | 790.90  | 781.89  | 782.39  | 1219.67 | 1201.66 | 1202.64 | 610.34  | 601.33  | 601.82  | 10 | L |
| L | 17 | 1693.88 | 1675.86 | 1676.85 | 847.44  | 838.44  | 838.93  | 1106.58 | 1088.57 | 1089.56 | 553.80  | 544.79  | 545.28  | 9  | L |
| E | 18 | 1822.92 | 1804.91 | 1805.89 | 911.96  | 902.96  | 903.45  | 993.50  | 975.49  | 976.47  | 497.25  | 488.25  | 488.74  | 8  | E |
| N | 19 | 1936.96 | 1918.95 | 1919.93 | 968.98  | 959.98  | 960.47  | 864.46  |         | 847.43  | 432.73  |         | 424.22  | 7  | N |
| L | 20 | 2050.05 | 2032.03 | 2033.02 | 1025.53 | 1016.52 | 1017.01 | 750.41  |         | 733.39  | 375.71  |         | 367.20  | 6  | L |
| Q | 21 | 2178.10 | 2160.09 | 2161.08 | 1089.56 | 1080.55 | 1081.04 | 637.33  |         | 620.30  | 319.17  |         | 310.66  | 5  | Q |
| A | 22 | 2249.14 | 2231.13 | 2232.11 | 1125.07 | 1116.07 | 1116.56 | 509.27  |         | 492.25  | 255.14  |         | 246.63  | 4  | A |
| Y | 23 | 2412.20 | 2394.19 | 2395.18 | 1206.61 | 1197.60 | 1198.09 | 438.23  |         | 421.21  | 219.62  |         | 211.11  | 3  | Y |
| Q | 24 | 2540.26 | 2522.25 | 2523.24 | 1270.64 | 1261.63 | 1262.12 | 275.17  |         | 258.14  | 138.09  |         | 129.58  | 2  | Q |
| K | 25 |         |         |         |         |         |         | 147.11  |         | 130.09  | 74.06   |         | 65.55   | 1  | K |



**WSN M1 218-242 phospho**

TIGTHPSSS(+79.97)AGLKDDLLENLQAYQK

Charge: 3, Exp. m/z: 922.784, Calc. m/z: 922.784

Data File: B110609\_010, Scans: 1000 - 1000

Max Intensity: 9.34e+02

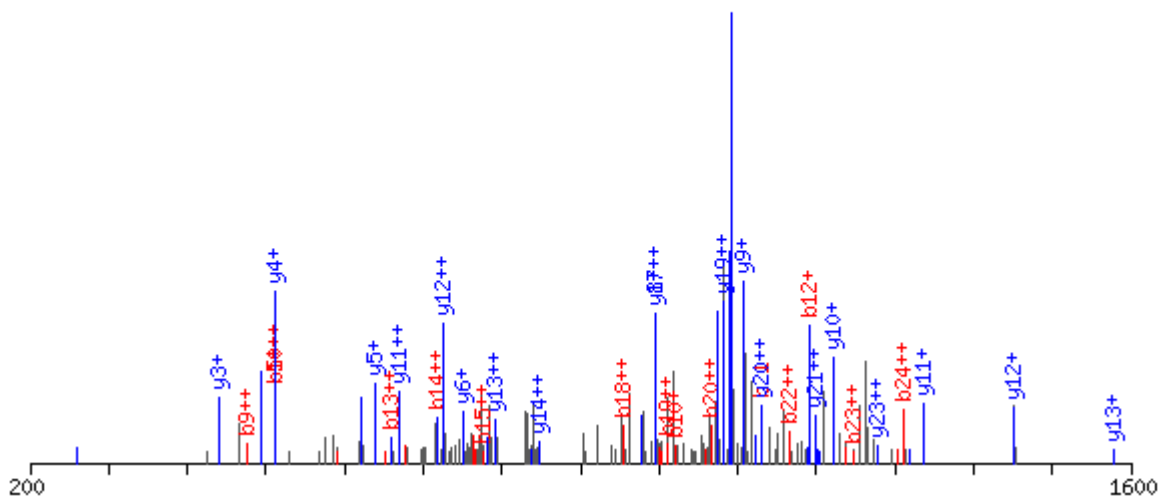

Showing fragment losses - Click to Hide

|   |    | b+      | -H2O    | -NH3    | b++     | -H2O    | -NH3    | y+      | -H2O    | -NH3    | y++     | -H2O    | -NH3    |    |   |
|---|----|---------|---------|---------|---------|---------|---------|---------|---------|---------|---------|---------|---------|----|---|
| T | 1  | 102.05  | 84.04   |         | 51.53   | 42.53   |         |         |         |         |         |         |         | 25 | T |
| I | 2  | 215.14  | 197.13  |         | 108.07  | 99.07   |         | 2665.29 | 2647.28 | 2648.26 | 1333.15 | 1324.14 | 1324.63 | 24 | I |
| G | 3  | 272.16  | 254.15  |         | 136.58  | 127.58  |         | 2552.20 | 2534.19 | 2535.18 | 1276.61 | 1267.60 | 1268.09 | 23 | G |
| T | 4  | 373.21  | 355.20  |         | 187.11  | 178.10  |         | 2495.18 | 2477.17 | 2478.15 | 1248.09 | 1239.09 | 1239.58 | 22 | T |
| H | 5  | 510.27  | 492.26  |         | 255.64  | 246.63  |         | 2394.13 | 2376.12 | 2377.11 | 1197.57 | 1188.57 | 1189.06 | 21 | H |
| P | 6  | 607.32  | 589.31  |         | 304.16  | 295.16  |         | 2257.07 | 2239.06 | 2240.05 | 1129.04 | 1120.04 | 1120.53 | 20 | P |
| S | 7  | 694.35  | 676.34  |         | 347.68  | 338.67  |         | 2160.02 | 2142.01 | 2143.00 | 1080.51 | 1071.51 | 1072.00 | 19 | S |
| S | 8  | 781.38  | 763.37  |         | 391.20  | 382.19  |         | 2072.99 | 2054.98 | 2055.96 | 1037.00 | 1027.99 | 1028.49 | 18 | S |
| S | 9  | 948.38  | 930.37  |         | 474.69  | 465.69  |         | 1985.96 | 1967.95 | 1968.93 | 993.48  | 984.48  | 984.97  | 17 | S |
| A | 10 | 1019.42 | 1001.41 |         | 510.21  | 501.21  |         | 1818.96 | 1800.95 | 1801.93 | 909.98  | 900.98  | 901.47  | 16 | A |
| G | 11 | 1076.44 | 1058.43 |         | 538.72  | 529.72  |         | 1747.92 | 1729.91 | 1730.90 | 874.46  | 865.46  | 865.95  | 15 | G |
| L | 12 | 1189.52 | 1171.51 |         | 595.27  | 586.26  |         | 1690.90 | 1672.89 | 1673.87 | 845.95  | 836.95  | 837.44  | 14 | L |
| K | 13 | 1317.62 | 1299.61 | 1300.59 | 659.31  | 650.31  | 650.80  | 1577.82 | 1559.81 | 1560.79 | 789.41  | 780.41  | 780.90  | 13 | K |
| D | 14 | 1432.65 | 1414.64 | 1415.62 | 716.83  | 707.82  | 708.31  | 1449.72 | 1431.71 | 1432.70 | 725.36  | 716.36  | 716.85  | 12 | D |
| D | 15 | 1547.67 | 1529.66 | 1530.65 | 774.34  | 765.34  | 765.83  | 1334.70 | 1316.68 | 1317.67 | 667.85  | 658.85  | 659.34  | 11 | D |
| L | 16 | 1660.76 | 1642.75 | 1643.73 | 830.88  | 821.88  | 822.37  | 1219.67 | 1201.66 | 1202.64 | 610.34  | 601.33  | 601.82  | 10 | L |
| L | 17 | 1773.84 | 1755.83 | 1756.82 | 887.42  | 878.42  | 878.91  | 1106.58 | 1088.57 | 1089.56 | 553.80  | 544.79  | 545.28  | 9  | L |
| E | 18 | 1902.88 | 1884.87 | 1885.86 | 951.95  | 942.94  | 943.43  | 993.50  | 975.49  | 976.47  | 497.25  | 488.25  | 488.74  | 8  | E |
| N | 19 | 2016.93 | 1998.92 | 1999.90 | 1008.97 | 999.96  | 1000.45 | 864.46  |         | 847.43  | 432.73  |         | 424.22  | 7  | N |
| L | 20 | 2130.01 | 2112.00 | 2112.98 | 1065.51 | 1056.50 | 1057.00 | 750.41  |         | 733.39  | 375.71  |         | 367.20  | 6  | L |
| Q | 21 | 2258.07 | 2240.06 | 2241.04 | 1129.54 | 1120.53 | 1121.03 | 637.33  |         | 620.30  | 319.17  |         | 310.66  | 5  | Q |
| A | 22 | 2329.11 | 2311.10 | 2312.08 | 1165.06 | 1156.05 | 1156.54 | 509.27  |         | 492.25  | 255.14  |         | 246.63  | 4  | A |
| Y | 23 | 2492.17 | 2474.16 | 2475.14 | 1246.59 | 1237.58 | 1238.08 | 438.23  |         | 421.21  | 219.62  |         | 211.11  | 3  | Y |
| Q | 24 | 2620.23 | 2602.22 | 2603.20 | 1310.62 | 1301.61 | 1302.10 | 275.17  |         | 258.14  | 138.09  |         | 129.58  | 2  | Q |
| K | 25 |         |         |         |         |         |         | 147.11  |         | 130.09  | 74.06   |         | 65.55   | 1  | K |

WSN M2 61-73 unmodified

## RGPSTEGVPESMR

Charge: 3, Exp. m/z: 468.229, Calc. m/z: 468.231

Data File: B110818\_008, Scans: 397 - 397

Max Intensity: 6.63e+03

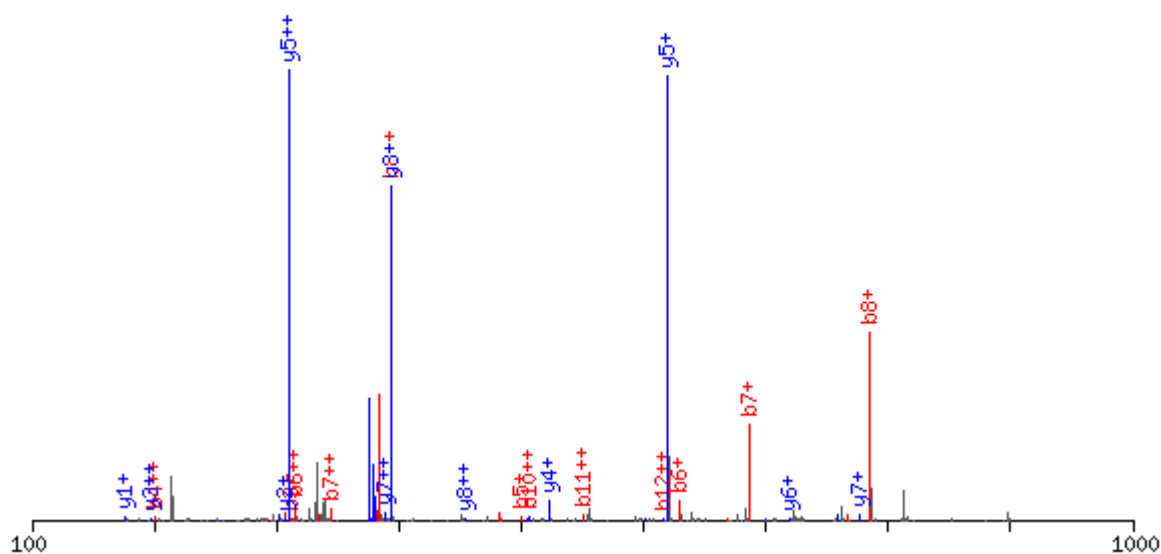[Hiding fragment losses - Click to Show](#)

|   |    | b+      | b++    | y+      | y++    |    |   |
|---|----|---------|--------|---------|--------|----|---|
| R | 1  | 157.11  | 79.06  |         |        | 13 | R |
| G | 2  | 214.13  | 107.57 | 1246.57 | 623.79 | 12 | G |
| P | 3  | 311.18  | 156.09 | 1189.55 | 595.28 | 11 | P |
| S | 4  | 398.21  | 199.61 | 1092.50 | 546.75 | 10 | S |
| T | 5  | 499.26  | 250.13 | 1005.47 | 503.24 | 9  | T |
| E | 6  | 628.30  | 314.66 | 904.42  | 452.71 | 8  | E |
| G | 7  | 685.33  | 343.17 | 775.38  | 388.19 | 7  | G |
| V | 8  | 784.39  | 392.70 | 718.36  | 359.68 | 6  | V |
| P | 9  | 881.45  | 441.23 | 619.29  | 310.15 | 5  | P |
| E | 10 | 1010.49 | 505.75 | 522.23  | 261.62 | 4  | E |
| S | 11 | 1097.52 | 549.26 | 393.19  | 197.10 | 3  | S |
| M | 12 | 1228.56 | 614.78 | 306.16  | 153.58 | 2  | M |
| R | 13 |         |        | 175.12  | 88.06  | 1  | R |

WSN M2 61-73 phospho

## RGPS(+79.97)TEGVPEMR

Charge: 2, Exp. m/z: 741.827, Calc. m/z: 741.827

Data File: B110406\_003, Scans: 452 - 452

Max Intensity: 2.03e+04

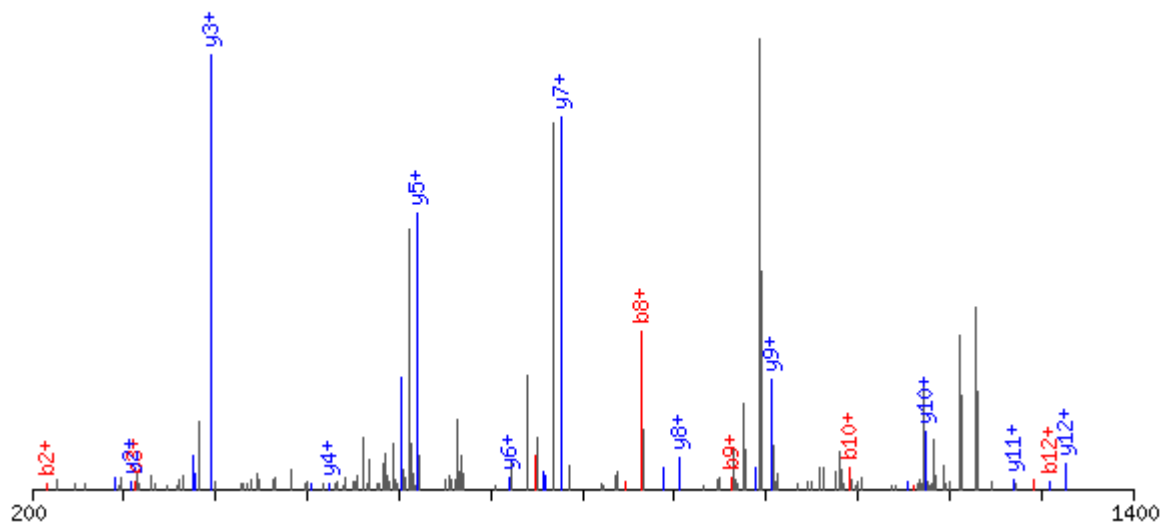

|   |    | b+      | -H2O    | -NH3    | y+      | -H2O    | -NH3    |    |   |
|---|----|---------|---------|---------|---------|---------|---------|----|---|
| R | 1  | 157.11  |         | 140.08  |         |         |         | 13 | R |
| G | 2  | 214.13  |         | 197.10  | 1326.54 | 1308.53 | 1309.51 | 12 | G |
| P | 3  | 311.18  |         | 294.16  | 1269.52 | 1251.51 | 1252.49 | 11 | P |
| S | 4  | 478.18  | 460.17  | 461.15  | 1172.47 | 1154.45 | 1155.44 | 10 | S |
| T | 5  | 579.23  | 561.22  | 562.20  | 1005.47 | 987.46  | 988.44  | 9  | T |
| E | 6  | 708.27  | 690.26  | 691.24  | 904.42  | 886.41  | 887.39  | 8  | E |
| G | 7  | 765.29  | 747.28  | 748.27  | 775.38  | 757.37  | 758.35  | 7  | G |
| V | 8  | 864.36  | 846.35  | 847.33  | 718.36  | 700.34  | 701.33  | 6  | V |
| P | 9  | 961.41  | 943.40  | 944.39  | 619.29  | 601.28  | 602.26  | 5  | P |
| E | 10 | 1090.46 | 1072.45 | 1073.43 | 522.23  | 504.22  | 505.21  | 4  | E |
| S | 11 | 1177.49 | 1159.48 | 1160.46 | 393.19  | 375.18  | 376.16  | 3  | S |
| M | 12 | 1308.53 | 1290.52 | 1291.50 | 306.16  |         | 289.13  | 2  | M |
| R | 13 |         |         |         | 175.12  |         | 158.09  | 1  | R |

WSN M2 61-77 phospho

RGPST(+79.97)EGVPESMREEYR

Charge: 3, Exp. m/z: 687.304, Calc. m/z: 687.304

Data File: B110406\_003, Scans: 518 - 518

Max Intensity: 1.11e+05

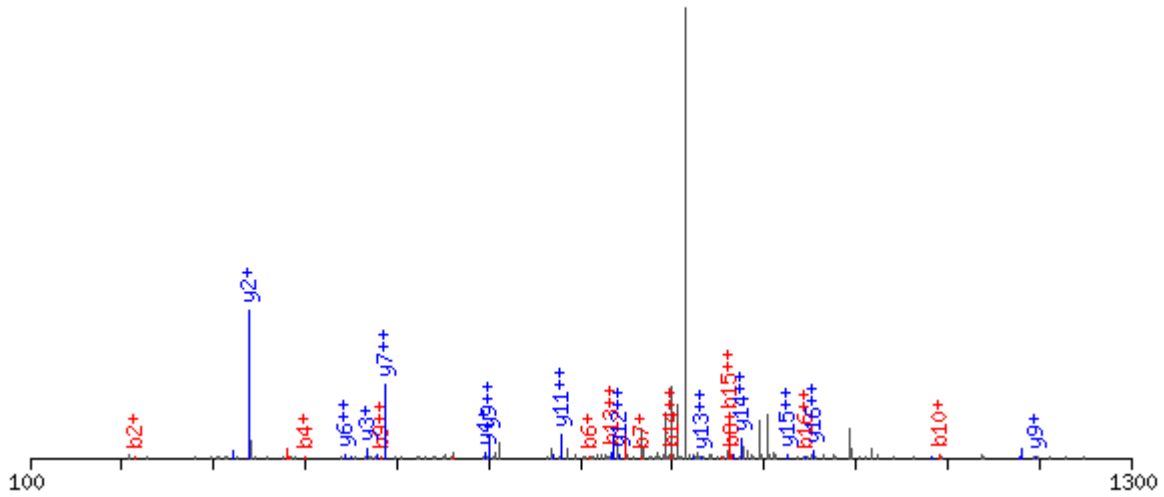

[Hiding fragment losses - Click to Show](#)

|   |    | b+      | b++    | y+      | y++    |    |   |
|---|----|---------|--------|---------|--------|----|---|
| R | 1  | 157.11  | 79.06  |         |        | 17 | R |
| G | 2  | 214.13  | 107.57 | 1903.79 | 952.40 | 16 | G |
| P | 3  | 311.18  | 156.09 | 1846.77 | 923.89 | 15 | P |
| S | 4  | 398.21  | 199.61 | 1749.71 | 875.36 | 14 | S |
| I | 5  | 579.23  | 290.12 | 1662.68 | 831.85 | 13 | I |
| E | 6  | 708.27  | 354.64 | 1481.67 | 741.34 | 12 | E |
| G | 7  | 765.29  | 383.15 | 1352.63 | 676.82 | 11 | G |
| V | 8  | 864.36  | 432.68 | 1295.60 | 648.31 | 10 | V |
| P | 9  | 961.41  | 481.21 | 1196.54 | 598.77 | 9  | P |
| E | 10 | 1090.46 | 545.73 | 1099.48 | 550.25 | 8  | E |
| S | 11 | 1177.49 | 589.25 | 970.44  | 485.72 | 7  | S |
| M | 12 | 1308.53 | 654.77 | 883.41  | 442.21 | 6  | M |
| R | 13 | 1464.63 | 732.82 | 752.37  | 376.69 | 5  | R |
| E | 14 | 1593.67 | 797.34 | 596.27  | 298.64 | 4  | E |
| E | 15 | 1722.72 | 861.86 | 467.22  | 234.12 | 3  | E |
| Y | 16 | 1885.78 | 943.39 | 338.18  | 169.59 | 2  | Y |
| R | 17 |         |        | 175.12  | 88.06  | 1  | R |

WSN M2 61-73 phospho x2

## RGPS(+79.97)T(+79.97)EGVPESMR

Charge: 2, Exp. m/z: 781.808, Calc. m/z: 781.812

Data File: B110609\_010, Scans: 467 - 467

Max Intensity: 5.28e+03

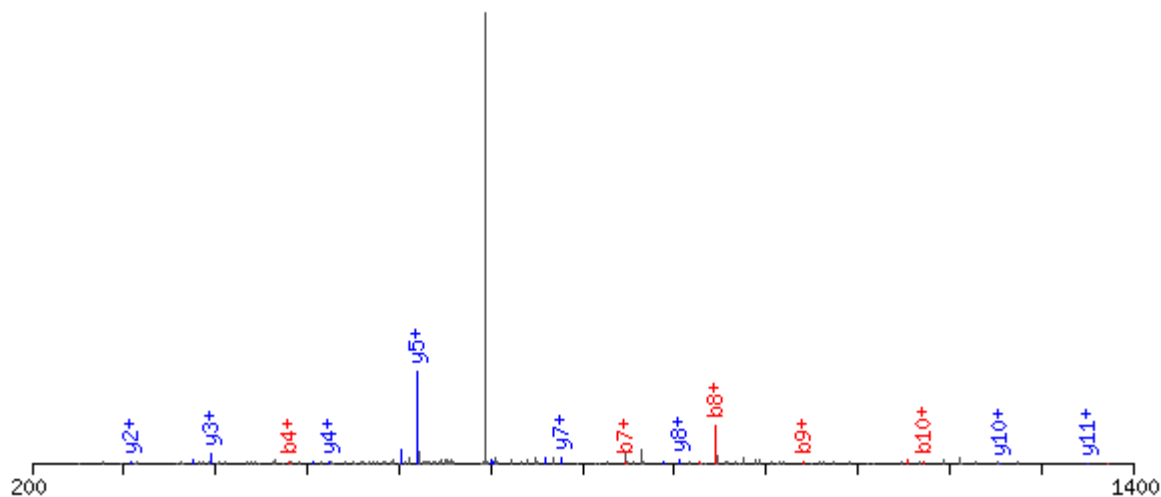

|   |    | b+      | -H2O    | -NH3    | y+      | -H2O    | -NH3    |    |   |
|---|----|---------|---------|---------|---------|---------|---------|----|---|
| R | 1  | 157.11  |         | 140.08  |         |         |         | 13 | R |
| G | 2  | 214.13  |         | 197.10  | 1406.51 | 1388.50 | 1389.48 | 12 | G |
| P | 3  | 311.18  |         | 294.16  | 1349.48 | 1331.47 | 1332.46 | 11 | P |
| S | 4  | 478.18  | 460.17  | 461.15  | 1252.43 | 1234.42 | 1235.41 | 10 | S |
| I | 5  | 659.19  | 641.18  | 642.17  | 1085.43 | 1067.42 | 1068.41 | 9  | I |
| E | 6  | 788.24  | 770.23  | 771.21  | 904.42  | 886.41  | 887.39  | 8  | E |
| G | 7  | 845.26  | 827.25  | 828.23  | 775.38  | 757.37  | 758.35  | 7  | G |
| V | 8  | 944.33  | 926.32  | 927.30  | 718.36  | 700.34  | 701.33  | 6  | V |
| P | 9  | 1041.38 | 1023.37 | 1024.35 | 619.29  | 601.28  | 602.26  | 5  | P |
| E | 10 | 1170.42 | 1152.41 | 1153.40 | 522.23  | 504.22  | 505.21  | 4  | E |
| S | 11 | 1257.45 | 1239.44 | 1240.43 | 393.19  | 375.18  | 376.16  | 3  | S |
| M | 12 | 1388.50 | 1370.48 | 1371.47 | 306.16  |         | 289.13  | 2  | M |
| R | 13 |         |         |         | 175.12  |         | 158.09  | 1  | R |

WSN NS1 25-39 unmodified

## GRGSTLGLDIETATR

Charge: 3, Exp. m/z: 516.282, Calc. m/z: 516.277

Data File: B120629\_004, Scans: 784 - 784

Max Intensity: 2.28e+05

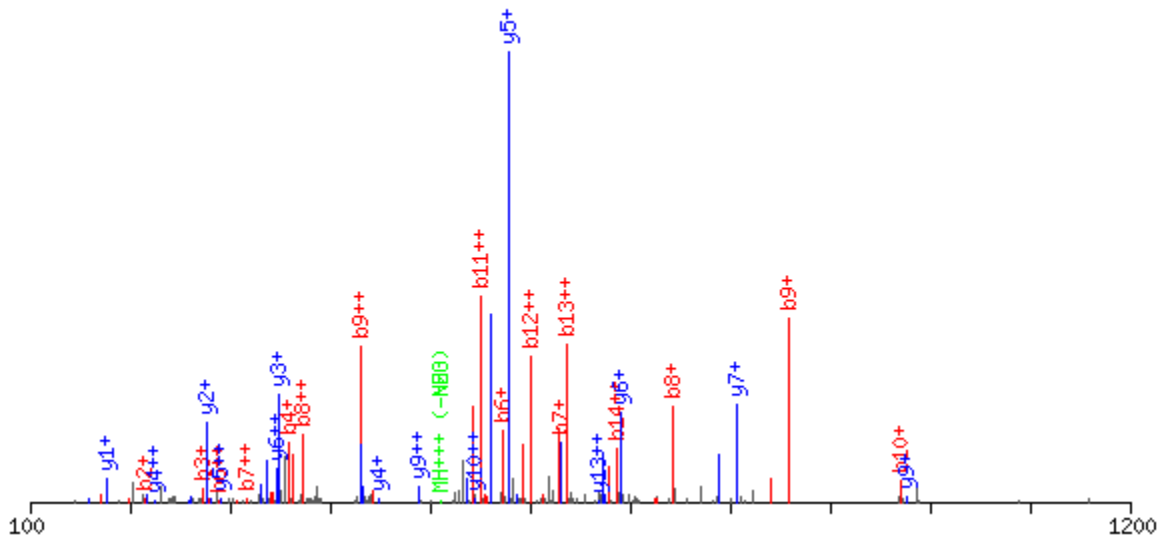[Hiding fragment losses - Click to Show](#)

|   |    | b+      | b++    | y+      | y++    |    |   |
|---|----|---------|--------|---------|--------|----|---|
| G | 1  | 58.03   | 29.52  |         |        | 15 | G |
| R | 2  | 214.13  | 107.57 | 1489.80 | 745.40 | 14 | R |
| G | 3  | 271.15  | 136.08 | 1333.70 | 667.35 | 13 | G |
| S | 4  | 358.18  | 179.60 | 1276.67 | 638.84 | 12 | S |
| T | 5  | 459.23  | 230.12 | 1189.64 | 595.32 | 11 | T |
| L | 6  | 572.32  | 286.66 | 1088.59 | 544.80 | 10 | L |
| G | 7  | 629.34  | 315.17 | 975.51  | 488.26 | 9  | G |
| L | 8  | 742.42  | 371.71 | 918.49  | 459.75 | 8  | L |
| D | 9  | 857.45  | 429.23 | 805.41  | 403.21 | 7  | D |
| I | 10 | 970.53  | 485.77 | 690.38  | 345.69 | 6  | I |
| E | 11 | 1099.57 | 550.29 | 577.29  | 289.15 | 5  | E |
| T | 12 | 1200.62 | 600.81 | 448.25  | 224.63 | 4  | T |
| A | 13 | 1271.66 | 636.33 | 347.20  | 174.11 | 3  | A |
| T | 14 | 1372.71 | 686.86 | 276.17  | 138.59 | 2  | T |
| R | 15 |         |        | 175.12  | 88.06  | 1  | R |

WSN NS1 25-39 phospho

## GRGS(+79.97)TLGLDIETATR

Charge: 2, Exp. m/z: 813.900, Calc. m/z: 813.897

Data File: B120629\_004, Scans: 838 - 838

Max Intensity: 1.65e+05

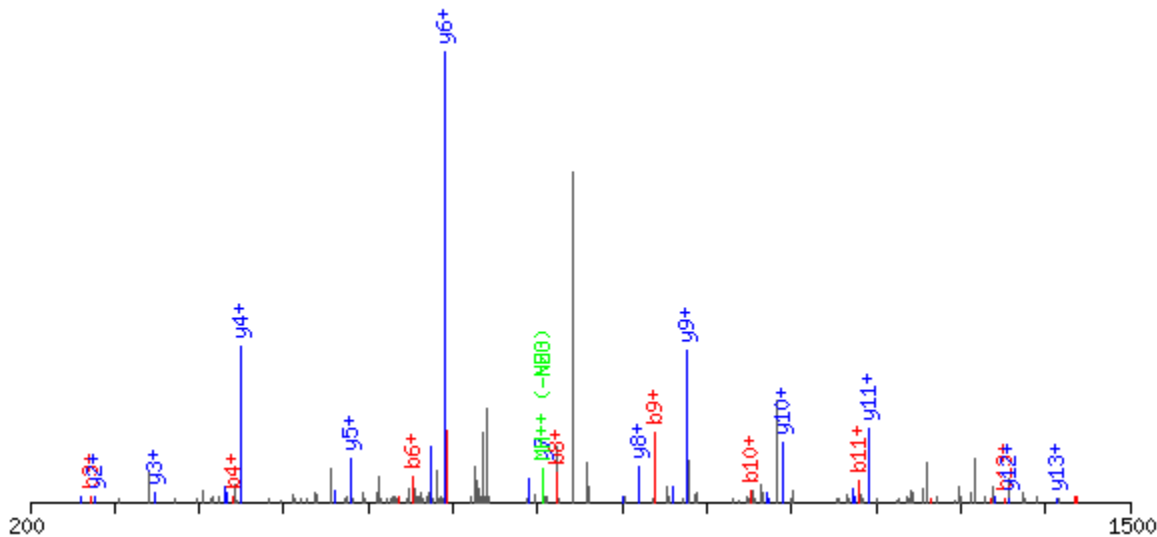

|   |    | b+      | -H2O    | -NH3    | y+      | -H2O    | -NH3    |    |   |
|---|----|---------|---------|---------|---------|---------|---------|----|---|
| G | 1  | 58.03   |         |         |         |         |         | 15 | G |
| R | 2  | 214.13  |         | 197.10  | 1569.76 | 1551.75 | 1552.74 | 14 | R |
| G | 3  | 271.15  |         | 254.12  | 1413.66 | 1395.65 | 1396.64 | 13 | G |
| S | 4  | 438.15  | 420.14  | 421.12  | 1356.64 | 1338.63 | 1339.61 | 12 | S |
| T | 5  | 539.20  | 521.19  | 522.17  | 1189.64 | 1171.63 | 1172.62 | 11 | T |
| L | 6  | 652.28  | 634.27  | 635.25  | 1088.59 | 1070.58 | 1071.57 | 10 | L |
| G | 7  | 709.30  | 691.29  | 692.28  | 975.51  | 957.50  | 958.48  | 9  | G |
| L | 8  | 822.39  | 804.38  | 805.36  | 918.49  | 900.48  | 901.46  | 8  | L |
| D | 9  | 937.41  | 919.40  | 920.39  | 805.41  | 787.39  | 788.38  | 7  | D |
| I | 10 | 1050.50 | 1032.49 | 1033.47 | 690.38  | 672.37  | 673.35  | 6  | I |
| E | 11 | 1179.54 | 1161.53 | 1162.51 | 577.29  | 559.28  | 560.27  | 5  | E |
| T | 12 | 1280.59 | 1262.58 | 1263.56 | 448.25  | 430.24  | 431.22  | 4  | T |
| A | 13 | 1351.63 | 1333.61 | 1334.60 | 347.20  | 329.19  | 330.18  | 3  | A |
| T | 14 | 1452.67 | 1434.66 | 1435.65 | 276.17  | 258.16  | 259.14  | 2  | T |
| R | 15 |         |         |         | 175.12  |         | 158.09  | 1  | R |

WSN NS1 194-200 unmodified

## VSETLQR

Charge: 2, Exp. m/z: 416.730, Calc. m/z: 416.734

Data File: B110318\_004, Scans: 275 - 275

Max Intensity: 2.67e+03

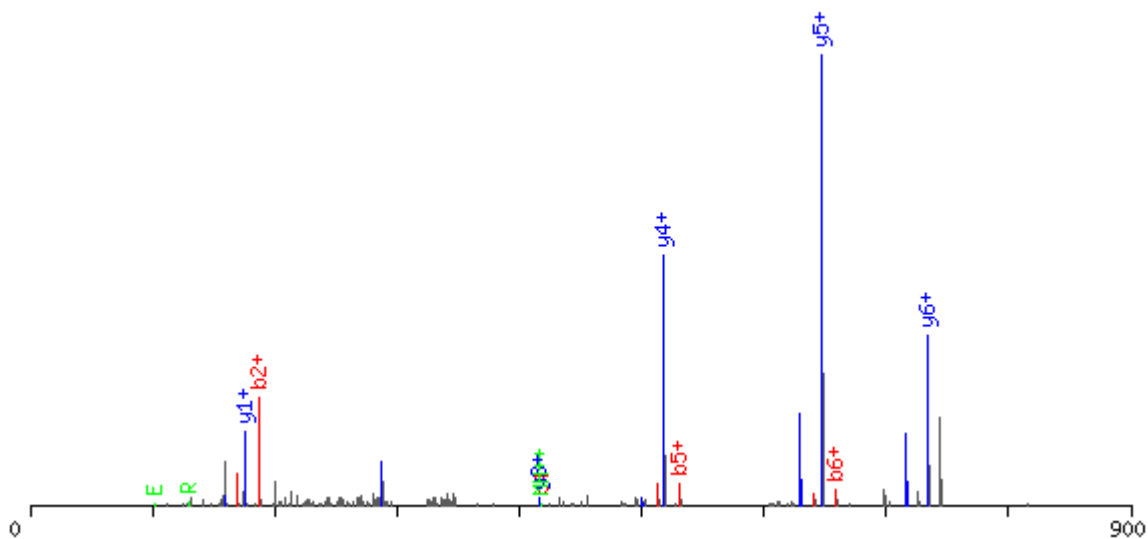

|   |   | b+     | -H2O   | y+     | -H2O   | -NH3   |   |   |
|---|---|--------|--------|--------|--------|--------|---|---|
| V | 1 | 100.08 |        |        |        |        | 7 | V |
| S | 2 | 187.11 | 169.10 | 733.38 | 715.37 | 716.36 | 6 | S |
| E | 3 | 316.15 | 298.14 | 646.35 | 628.34 | 629.33 | 5 | E |
| T | 4 | 417.20 | 399.19 | 517.31 | 499.30 | 500.28 | 4 | T |
| L | 5 | 530.28 | 512.27 | 416.26 |        | 399.24 | 3 | L |
| Q | 6 | 658.34 | 640.33 | 303.18 |        | 286.15 | 2 | Q |
| R | 7 |        |        | 175.12 |        | 158.09 | 1 | R |



WSN NS1 194-200 phospho

## VSET(+79.97)LQR

Charge: 2, Exp. m/z: 456.714, Calc. m/z: 456.717

Data File: B110318\_003, Scans: 322 - 322

Max Intensity: 1.94e+02

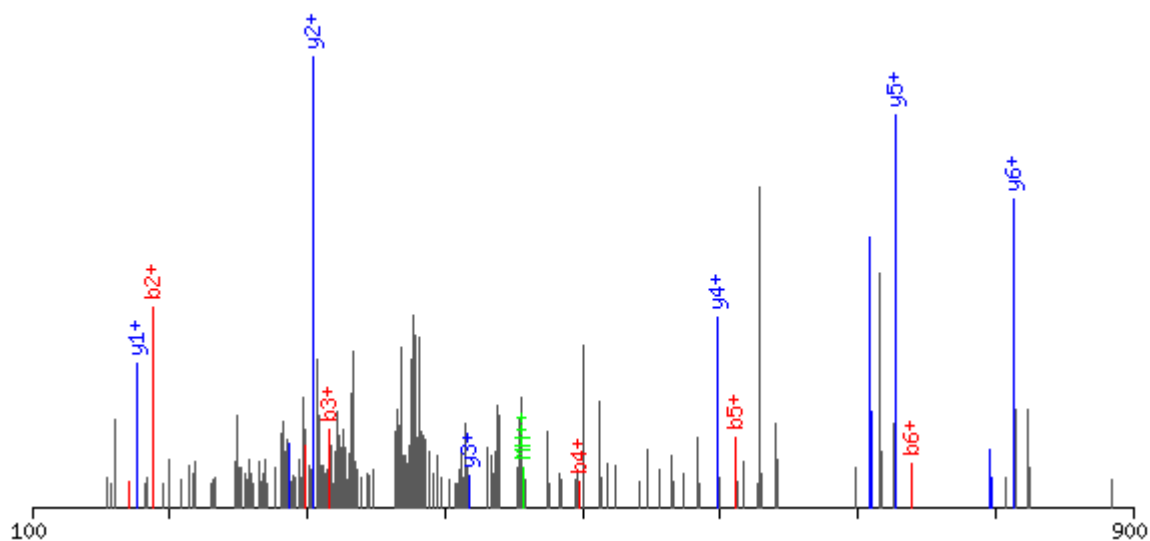

|   |   | b+     | -H2O   | y+     | -H2O   | -NH3   |   |   |
|---|---|--------|--------|--------|--------|--------|---|---|
| V | 1 | 100.08 |        |        |        |        | 7 | V |
| S | 2 | 187.11 | 169.10 | 813.35 | 795.34 | 796.32 | 6 | S |
| E | 3 | 316.15 | 298.14 | 726.32 | 708.31 | 709.29 | 5 | E |
| I | 4 | 497.16 | 479.15 | 597.28 | 579.27 | 580.25 | 4 | I |
| L | 5 | 610.25 | 592.24 | 416.26 |        | 399.24 | 3 | L |
| Q | 6 | 738.31 | 720.30 | 303.18 |        | 286.15 | 2 | Q |
| R | 7 |        |        | 175.12 |        | 158.09 | 1 | R |

WSN NS1 205-217 unmodified

## SSNEN(+0.98)GRPPLTPK

Charge: 2, Exp. m/z: 699.355, Calc. m/z: 699.357

Data File: B120705\_021, Scans: 812 - 812

Max Intensity: 3.70e+01

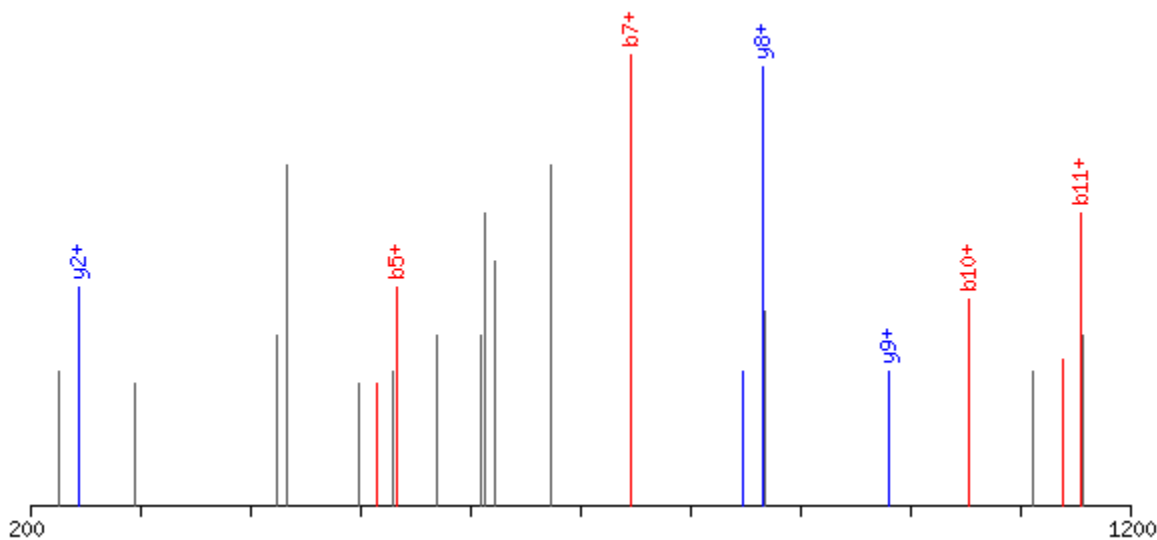

|          |    | b+      | -H2O    | -NH3    | y+      | -H2O    | -NH3    |    |          |
|----------|----|---------|---------|---------|---------|---------|---------|----|----------|
| S        | 1  | 88.04   | 70.03   |         |         |         |         | 13 | S        |
| S        | 2  | 175.07  | 157.06  |         | 1310.67 | 1292.66 | 1293.64 | 12 | S        |
| N        | 3  | 289.11  | 271.10  | 272.09  | 1223.64 | 1205.63 | 1206.61 | 11 | N        |
| E        | 4  | 418.16  | 400.15  | 401.13  | 1109.59 | 1091.58 | 1092.57 | 10 | E        |
| <u>N</u> | 5  | 533.18  | 515.17  | 516.16  | 980.55  | 962.54  | 963.53  | 9  | <u>N</u> |
| G        | 6  | 590.21  | 572.19  | 573.18  | 865.53  | 847.51  | 848.50  | 8  | G        |
| R        | 7  | 746.31  | 728.30  | 729.28  | 808.50  | 790.49  | 791.48  | 7  | R        |
| P        | 8  | 843.36  | 825.35  | 826.33  | 652.40  | 634.39  | 635.38  | 6  | P        |
| P        | 9  | 940.41  | 922.40  | 923.39  | 555.35  | 537.34  | 538.32  | 5  | P        |
| L        | 10 | 1053.50 | 1035.49 | 1036.47 | 458.30  | 440.29  | 441.27  | 4  | L        |
| T        | 11 | 1154.54 | 1136.53 | 1137.52 | 345.21  | 327.20  | 328.19  | 3  | T        |
| P        | 12 | 1251.60 | 1233.59 | 1234.57 | 244.17  |         | 227.14  | 2  | P        |
| K        | 13 |         |         |         | 147.11  |         | 130.09  | 1  | K        |

WSN NS1 205-217 phospho

## SSNENGRPPLT(+79.97)PK

Charge: 2, Exp. m/z: 738.845, Calc. m/z: 738.847  
 Data File: B120705\_021\_120711175724, Scans: 634 - 634

Max Intensity: 2.66e+03

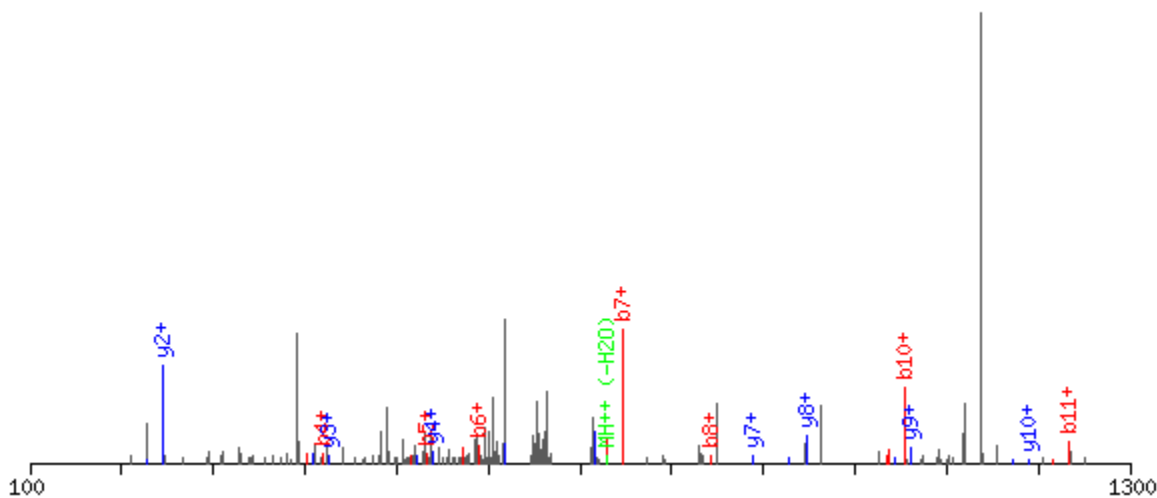

|   |    | b+      | -H2O    | -NH3    | y+      | -H2O    | -NH3    |    |   |
|---|----|---------|---------|---------|---------|---------|---------|----|---|
| S | 1  | 88.04   | 70.03   |         |         |         |         | 13 | S |
| S | 2  | 175.07  | 157.06  |         | 1389.65 | 1371.64 | 1372.63 | 12 | S |
| N | 3  | 289.11  | 271.10  | 272.09  | 1302.62 | 1284.61 | 1285.59 | 11 | N |
| E | 4  | 418.16  | 400.15  | 401.13  | 1188.58 | 1170.57 | 1171.55 | 10 | E |
| N | 5  | 532.20  | 514.19  | 515.17  | 1059.53 | 1041.52 | 1042.51 | 9  | N |
| G | 6  | 589.22  | 571.21  | 572.19  | 945.49  | 927.48  | 928.47  | 8  | G |
| R | 7  | 745.32  | 727.31  | 728.30  | 888.47  | 870.46  | 871.44  | 7  | R |
| P | 8  | 842.38  | 824.36  | 825.35  | 732.37  | 714.36  | 715.34  | 6  | P |
| P | 9  | 939.43  | 921.42  | 922.40  | 635.32  | 617.31  | 618.29  | 5  | P |
| L | 10 | 1052.51 | 1034.50 | 1035.49 | 538.26  | 520.25  | 521.24  | 4  | L |
| I | 11 | 1233.53 | 1215.52 | 1216.50 | 425.18  | 407.17  | 408.15  | 3  | I |
| P | 12 | 1330.58 | 1312.57 | 1313.55 | 244.17  |         | 227.14  | 2  | P |
| K | 13 |         |         |         | 147.11  |         | 130.09  | 1  | K |

WSN NS1 205-217 unmodified

## SSNENGRPPLTPK

Charge: 2, Exp. m/z: 698.863, Calc. m/z: 698.862

Data File: B110210\_012, Scans: 647 - 647

Max Intensity: 1.37e+02

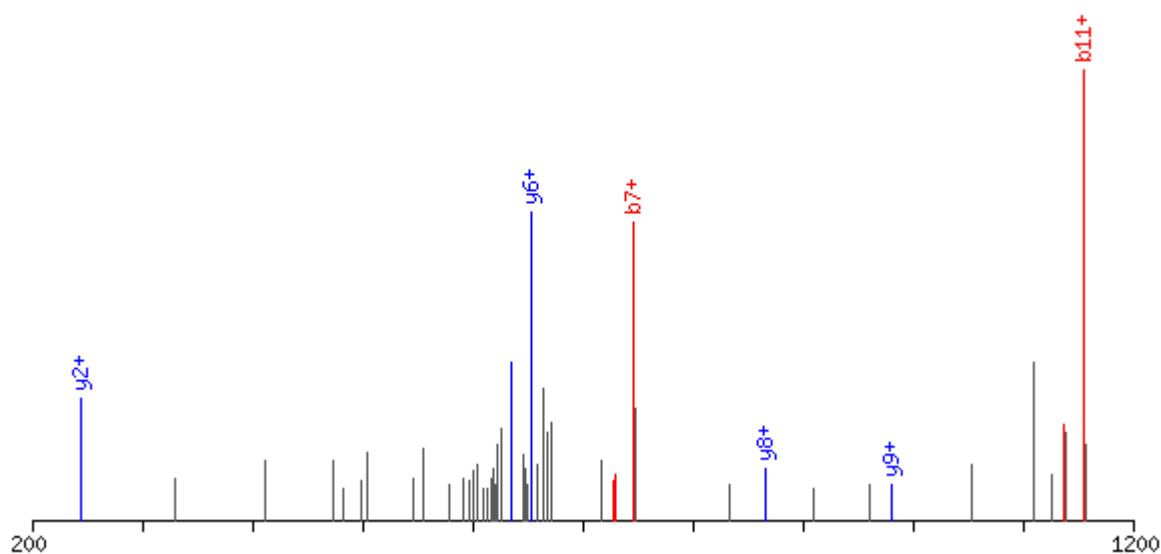

|   |    | b+      | -H2O    | -NH3    | y+      | -H2O    | -NH3    |    |   |
|---|----|---------|---------|---------|---------|---------|---------|----|---|
| S | 1  | 88.04   | 70.03   |         |         |         |         | 13 | S |
| S | 2  | 175.07  | 157.06  |         | 1309.69 | 1291.68 | 1292.66 | 12 | S |
| N | 3  | 289.11  | 271.10  | 272.09  | 1222.65 | 1204.64 | 1205.63 | 11 | N |
| E | 4  | 418.16  | 400.15  | 401.13  | 1108.61 | 1090.60 | 1091.58 | 10 | E |
| N | 5  | 532.20  | 514.19  | 515.17  | 979.57  | 961.56  | 962.54  | 9  | N |
| G | 6  | 589.22  | 571.21  | 572.19  | 865.53  | 847.51  | 848.50  | 8  | G |
| R | 7  | 745.32  | 727.31  | 728.30  | 808.50  | 790.49  | 791.48  | 7  | R |
| P | 8  | 842.38  | 824.36  | 825.35  | 652.40  | 634.39  | 635.38  | 6  | P |
| P | 9  | 939.43  | 921.42  | 922.40  | 555.35  | 537.34  | 538.32  | 5  | P |
| L | 10 | 1052.51 | 1034.50 | 1035.49 | 458.30  | 440.29  | 441.27  | 4  | L |
| T | 11 | 1153.56 | 1135.55 | 1136.53 | 345.21  | 327.20  | 328.19  | 3  | T |
| P | 12 | 1250.61 | 1232.60 | 1233.59 | 244.17  |         | 227.14  | 2  | P |
| K | 13 |         |         |         | 147.11  |         | 130.09  | 1  | K |

## WSN NS1 205-217 phospho and deamidated

## SSNEN(+0.98)GRPPLT(+79.97)PK

Charge: 2, Exp. m/z: 739.339, Calc. m/z: 739.337

Data File: B110318\_003, Scans: 461 - 461

Max Intensity: 1.42e+02

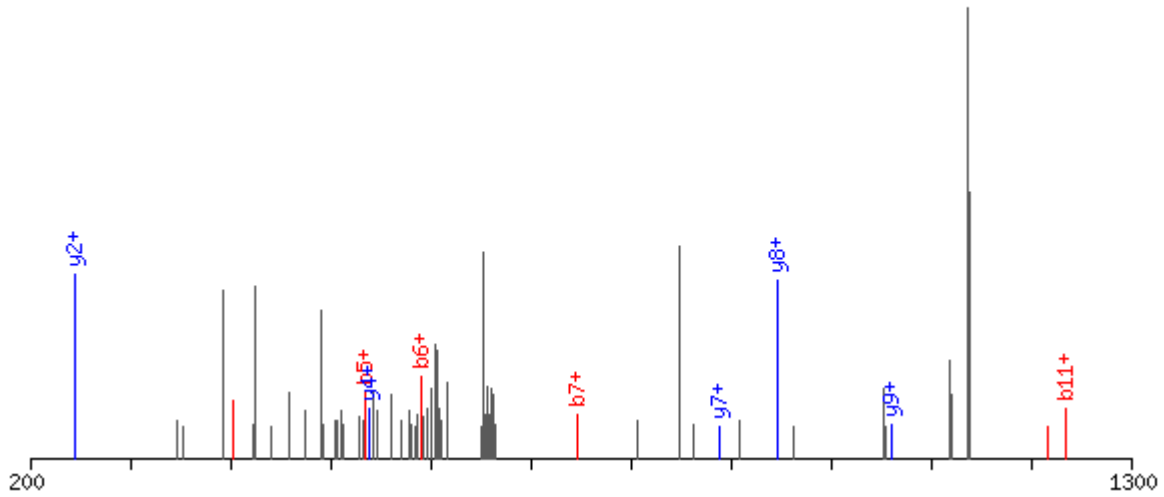

|          |    | b+      | -H2O    | -NH3    | y+      | -H2O    | -NH3    |    |          |
|----------|----|---------|---------|---------|---------|---------|---------|----|----------|
| S        | 1  | 88.04   | 70.03   |         |         |         |         | 13 | S        |
| S        | 2  | 175.07  | 157.06  |         | 1390.64 | 1372.63 | 1373.61 | 12 | S        |
| N        | 3  | 289.11  | 271.10  | 272.09  | 1303.60 | 1285.59 | 1286.58 | 11 | N        |
| E        | 4  | 418.16  | 400.15  | 401.13  | 1189.56 | 1171.55 | 1172.53 | 10 | E        |
| <u>N</u> | 5  | 533.18  | 515.17  | 516.16  | 1060.52 | 1042.51 | 1043.49 | 9  | <u>N</u> |
| G        | 6  | 590.21  | 572.19  | 573.18  | 945.49  | 927.48  | 928.47  | 8  | G        |
| R        | 7  | 746.31  | 728.30  | 729.28  | 888.47  | 870.46  | 871.44  | 7  | R        |
| P        | 8  | 843.36  | 825.35  | 826.33  | 732.37  | 714.36  | 715.34  | 6  | P        |
| P        | 9  | 940.41  | 922.40  | 923.39  | 635.32  | 617.31  | 618.29  | 5  | P        |
| L        | 10 | 1053.50 | 1035.49 | 1036.47 | 538.26  | 520.25  | 521.24  | 4  | L        |
| <u>I</u> | 11 | 1234.51 | 1216.50 | 1217.48 | 425.18  | 407.17  | 408.15  | 3  | <u>I</u> |
| P        | 12 | 1331.56 | 1313.55 | 1314.54 | 244.17  |         | 227.14  | 2  | P        |
| K        | 13 |         |         |         | 147.11  |         | 130.09  | 1  | K        |

WSN NEP 19-39 unmodified

## MLGSSSEDLNGIITQFESLK

Charge: 2, Exp. m/z: 1149.070, Calc. m/z: 1149.072

Data File: B110609\_010, Scans: 1461 - 1461

Max Intensity: 2.65e+02

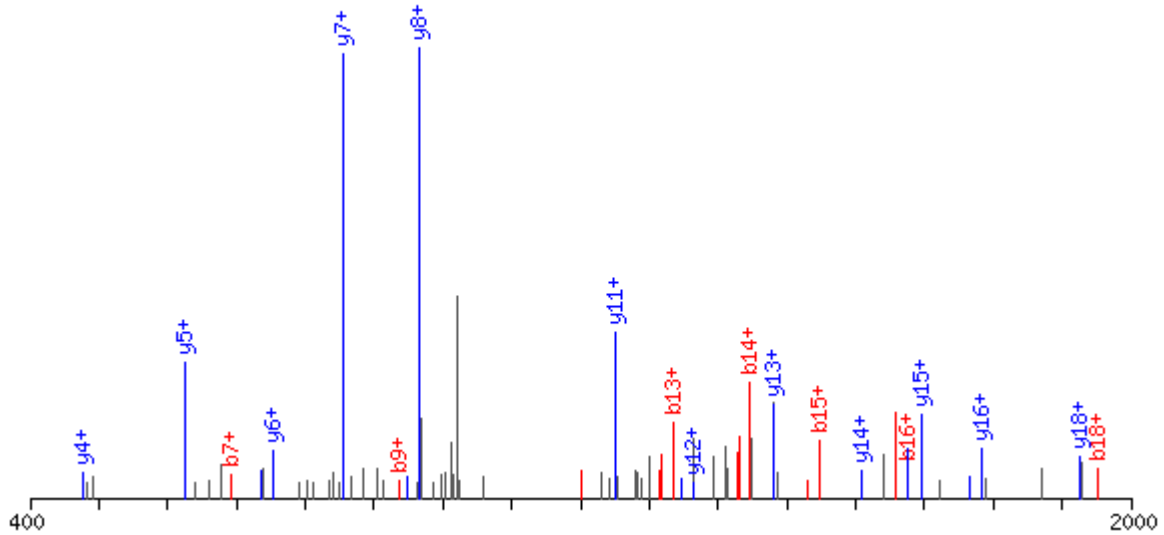

|   |    | b+      | -H2O    | -NH3    | y+      | -H2O    | -NH3    |    |   |
|---|----|---------|---------|---------|---------|---------|---------|----|---|
| M | 1  | 132.05  |         |         |         |         |         | 21 | M |
| Q | 2  | 260.11  |         |         | 2166.09 | 2148.08 | 2149.07 | 20 | Q |
| L | 3  | 373.19  |         |         | 2038.03 | 2020.02 | 2021.01 | 19 | L |
| G | 4  | 430.21  |         |         | 1924.95 | 1906.94 | 1907.92 | 18 | G |
| S | 5  | 517.24  | 499.23  |         | 1867.93 | 1849.92 | 1850.90 | 17 | S |
| S | 6  | 604.28  | 586.27  |         | 1780.90 | 1762.89 | 1763.87 | 16 | S |
| S | 7  | 691.31  | 673.30  |         | 1693.86 | 1675.85 | 1676.84 | 15 | S |
| E | 8  | 820.35  | 802.34  |         | 1606.83 | 1588.82 | 1589.81 | 14 | E |
| D | 9  | 935.38  | 917.37  |         | 1477.79 | 1459.78 | 1460.76 | 13 | D |
| L | 10 | 1048.46 | 1030.45 |         | 1362.76 | 1344.75 | 1345.74 | 12 | L |
| N | 11 | 1162.50 | 1144.49 | 1145.48 | 1249.68 | 1231.67 | 1232.65 | 11 | N |
| G | 12 | 1219.53 | 1201.52 | 1202.50 | 1135.64 | 1117.63 | 1118.61 | 10 | G |
| I | 13 | 1332.61 | 1314.60 | 1315.58 | 1078.61 | 1060.60 | 1061.59 | 9  | I |
| I | 14 | 1445.69 | 1427.68 | 1428.67 | 965.53  | 947.52  | 948.50  | 8  | I |
| T | 15 | 1546.74 | 1528.73 | 1529.72 | 852.45  | 834.44  | 835.42  | 7  | T |
| Q | 16 | 1674.80 | 1656.79 | 1657.77 | 751.40  | 733.39  | 734.37  | 6  | Q |
| F | 17 | 1821.87 | 1803.86 | 1804.84 | 623.34  | 605.33  | 606.31  | 5  | F |
| E | 18 | 1950.91 | 1932.90 | 1933.88 | 476.27  | 458.26  | 459.24  | 4  | E |
| S | 19 | 2037.94 | 2019.93 | 2020.92 | 347.23  | 329.22  | 330.20  | 3  | S |
| L | 20 | 2151.03 | 2133.02 | 2134.00 | 260.20  |         | 243.17  | 2  | L |
| K | 21 |         |         |         | 147.11  |         | 130.09  | 1  | K |

**WSN NEP 19-39 phospho and deamidated**

**MLGSS(+79.97)SEDLN(+0.98)GIITQFESLK**

Charge: 2, Exp. m/z: 1189.550, Calc. m/z: 1189.547

Data File: B110609\_010, Scans: 1359 - 1359

Max Intensity: 2.84e+03

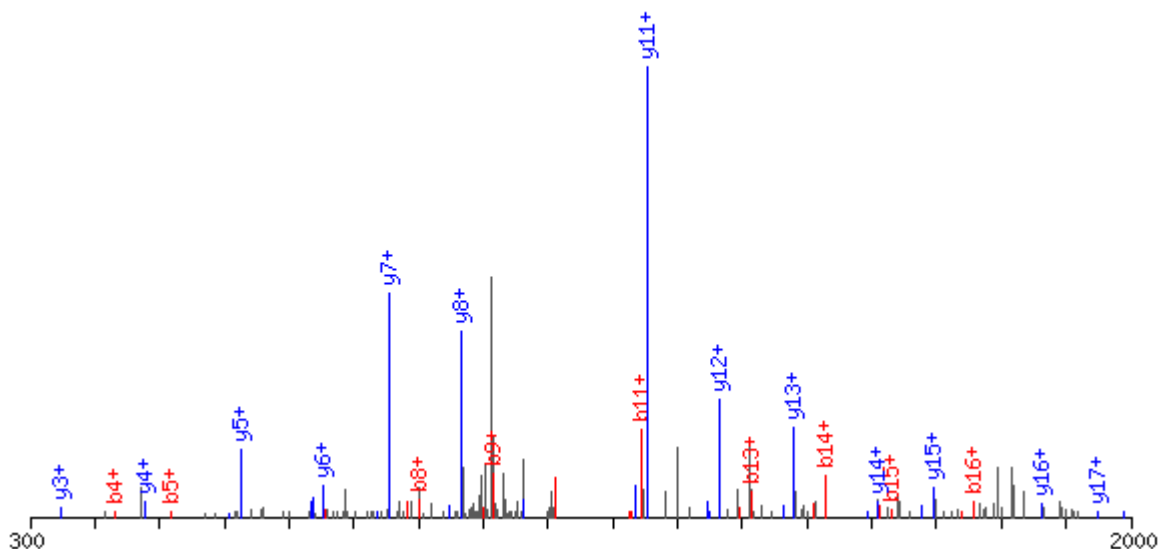

|   |    | b+      | -H2O    | -NH3    | y+      | -H2O    | -NH3    |    |   |
|---|----|---------|---------|---------|---------|---------|---------|----|---|
| M | 1  | 132.05  |         |         |         |         |         | 21 | M |
| Q | 2  | 260.11  |         |         | 2247.04 | 2229.03 | 2230.02 | 20 | Q |
| L | 3  | 373.19  |         |         | 2118.98 | 2100.97 | 2101.96 | 19 | L |
| G | 4  | 430.21  |         |         | 2005.90 | 1987.89 | 1988.87 | 18 | G |
| S | 5  | 517.24  | 499.23  |         | 1948.88 | 1930.87 | 1931.85 | 17 | S |
| S | 6  | 684.24  | 666.23  |         | 1861.85 | 1843.84 | 1844.82 | 16 | S |
| S | 7  | 771.27  | 753.26  |         | 1694.85 | 1676.84 | 1677.82 | 15 | S |
| E | 8  | 900.32  | 882.31  |         | 1607.82 | 1589.81 | 1590.79 | 14 | E |
| D | 9  | 1015.34 | 997.33  |         | 1478.77 | 1460.76 | 1461.75 | 13 | D |
| L | 10 | 1128.43 | 1110.42 |         | 1363.75 | 1345.74 | 1346.72 | 12 | L |
| N | 11 | 1243.45 | 1225.44 | 1226.43 | 1250.66 | 1232.65 | 1233.64 | 11 | N |
| G | 12 | 1300.48 | 1282.47 | 1283.45 | 1135.64 | 1117.63 | 1118.61 | 10 | G |
| I | 13 | 1413.56 | 1395.55 | 1396.53 | 1078.61 | 1060.60 | 1061.59 | 9  | I |
| I | 14 | 1526.64 | 1508.63 | 1509.62 | 965.53  | 947.52  | 948.50  | 8  | I |
| T | 15 | 1627.69 | 1609.68 | 1610.67 | 852.45  | 834.44  | 835.42  | 7  | T |
| Q | 16 | 1755.75 | 1737.74 | 1738.72 | 751.40  | 733.39  | 734.37  | 6  | Q |
| F | 17 | 1902.82 | 1884.81 | 1885.79 | 623.34  | 605.33  | 606.31  | 5  | F |
| E | 18 | 2031.86 | 2013.85 | 2014.84 | 476.27  | 458.26  | 459.24  | 4  | E |
| S | 19 | 2118.89 | 2100.88 | 2101.87 | 347.23  | 329.22  | 330.20  | 3  | S |
| L | 20 | 2231.98 | 2213.97 | 2214.95 | 260.20  |         | 243.17  | 2  | L |
| K | 21 |         |         |         | 147.11  |         | 130.09  | 1  | K |

WSN NEP 19-39 phospho

MLQGSS(+79.97)SEDLNGIITQFESLK

Charge: 2, Exp. m/z: 1189.050, Calc. m/z: 1189.052

Data File: B110609\_010, Scans: 1530 - 1530

Max Intensity: 2.98e+03

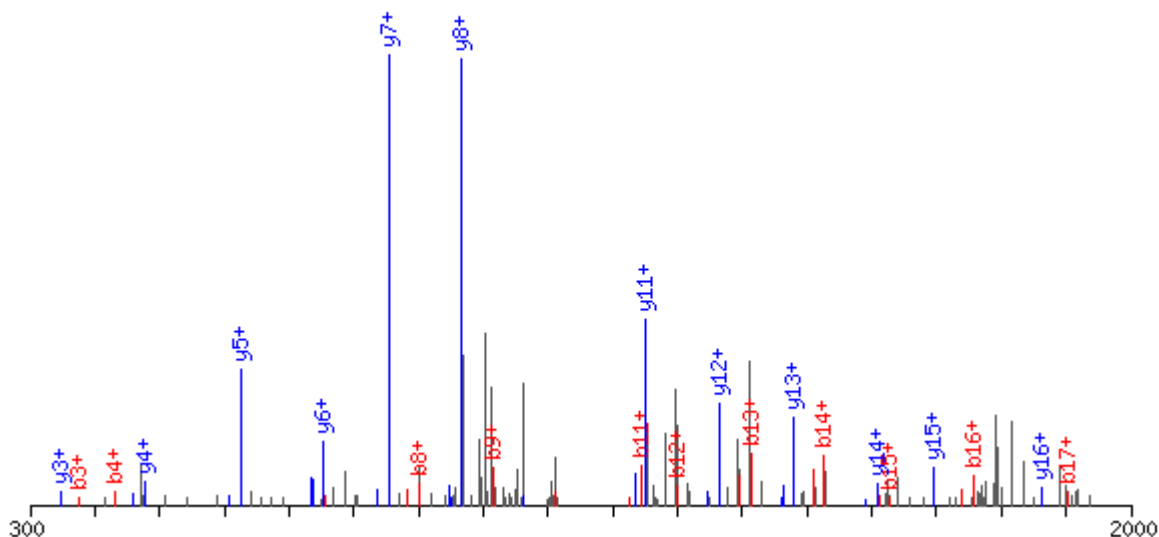

|   |    | b+      | -H2O    | -NH3    | y+      | -H2O    | -NH3    |    |   |
|---|----|---------|---------|---------|---------|---------|---------|----|---|
| M | 1  | 132.05  |         |         |         |         |         | 21 | M |
| Q | 2  | 260.11  |         |         | 2246.06 | 2228.05 | 2229.03 | 20 | Q |
| L | 3  | 373.19  |         |         | 2118.00 | 2099.99 | 2100.97 | 19 | L |
| G | 4  | 430.21  |         |         | 2004.92 | 1986.91 | 1987.89 | 18 | G |
| S | 5  | 517.24  | 499.23  |         | 1947.89 | 1929.88 | 1930.87 | 17 | S |
| S | 6  | 684.24  | 666.23  |         | 1860.86 | 1842.85 | 1843.84 | 16 | S |
| S | 7  | 771.27  | 753.26  |         | 1693.86 | 1675.85 | 1676.84 | 15 | S |
| E | 8  | 900.32  | 882.31  |         | 1606.83 | 1588.82 | 1589.81 | 14 | E |
| D | 9  | 1015.34 | 997.33  |         | 1477.79 | 1459.78 | 1460.76 | 13 | D |
| L | 10 | 1128.43 | 1110.42 |         | 1362.76 | 1344.75 | 1345.74 | 12 | L |
| N | 11 | 1242.47 | 1224.46 | 1225.44 | 1249.68 | 1231.67 | 1232.65 | 11 | N |
| G | 12 | 1299.49 | 1281.48 | 1282.47 | 1135.64 | 1117.63 | 1118.61 | 10 | G |
| I | 13 | 1412.58 | 1394.57 | 1395.55 | 1078.61 | 1060.60 | 1061.59 | 9  | I |
| I | 14 | 1525.66 | 1507.65 | 1508.63 | 965.53  | 947.52  | 948.50  | 8  | I |
| T | 15 | 1626.71 | 1608.70 | 1609.68 | 852.45  | 834.44  | 835.42  | 7  | T |
| Q | 16 | 1754.77 | 1736.76 | 1737.74 | 751.40  | 733.39  | 734.37  | 6  | Q |
| F | 17 | 1901.84 | 1883.82 | 1884.81 | 623.34  | 605.33  | 606.31  | 5  | F |
| E | 18 | 2030.88 | 2012.87 | 2013.85 | 476.27  | 458.26  | 459.24  | 4  | E |
| S | 19 | 2117.91 | 2099.90 | 2100.88 | 347.23  | 329.22  | 330.20  | 3  | S |
| L | 20 | 2230.99 | 2212.98 | 2213.97 | 260.20  |         | 243.17  | 2  | L |
| K | 21 |         |         |         | 147.11  |         | 130.09  | 1  | K |



PR8 NP 401-416 unmodified

## ASAGQISIQPTFSVQR

Charge: 2, Exp. m/z: 845.451, Calc. m/z: 845.452  
 Data File: B120210\_001\_120211144847, Scans: 4422 - 4422

Max Intensity: 5.93e+05

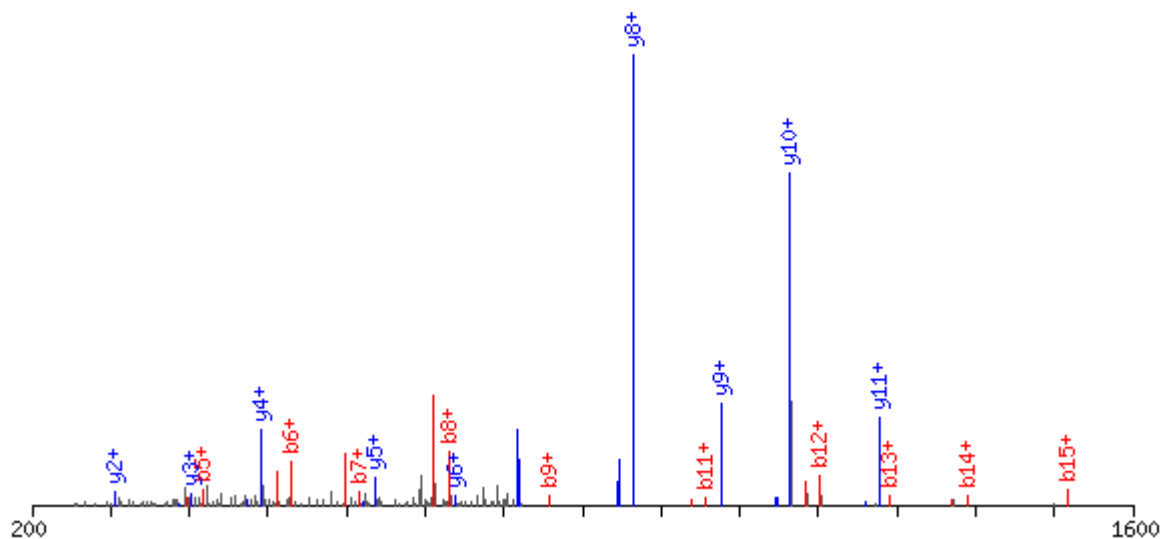

|   |    | b+      | -H2O    | y+      | -H2O    | -NH3    |    |   |
|---|----|---------|---------|---------|---------|---------|----|---|
| A | 1  | 72.04   |         |         |         |         | 16 | A |
| S | 2  | 159.08  | 141.07  | 1618.85 | 1600.84 | 1601.83 | 15 | S |
| A | 3  | 230.11  | 212.10  | 1531.82 | 1513.81 | 1514.80 | 14 | A |
| G | 4  | 287.13  | 269.12  | 1460.79 | 1442.78 | 1443.76 | 13 | G |
| Q | 5  | 415.19  | 397.18  | 1403.76 | 1385.75 | 1386.74 | 12 | Q |
| I | 6  | 528.28  | 510.27  | 1275.71 | 1257.70 | 1258.68 | 11 | I |
| S | 7  | 615.31  | 597.30  | 1162.62 | 1144.61 | 1145.59 | 10 | S |
| I | 8  | 728.39  | 710.38  | 1075.59 | 1057.58 | 1058.56 | 9  | I |
| Q | 9  | 856.45  | 838.44  | 962.51  | 944.49  | 945.48  | 8  | Q |
| P | 10 | 953.51  | 935.49  | 834.45  | 816.44  | 817.42  | 7  | P |
| T | 11 | 1054.55 | 1036.54 | 737.39  | 719.38  | 720.37  | 6  | T |
| F | 12 | 1201.62 | 1183.61 | 636.35  | 618.34  | 619.32  | 5  | F |
| S | 13 | 1288.65 | 1270.64 | 489.28  | 471.27  | 472.25  | 4  | S |
| V | 14 | 1387.72 | 1369.71 | 402.25  |         | 385.22  | 3  | V |
| Q | 15 | 1515.78 | 1497.77 | 303.18  |         | 286.15  | 2  | Q |
| R | 16 |         |         | 175.12  |         | 158.09  | 1  | R |

PR8 NP 401-416 phospho

AS(+79.97)AGQISIQPTFSVQR

Charge: 2, Exp. m/z: 885.432, Calc. m/z: 885.432  
 Data File: B120210\_001\_120211144847, Scans: 4748 - 4748

Max Intensity: 1.31e+04

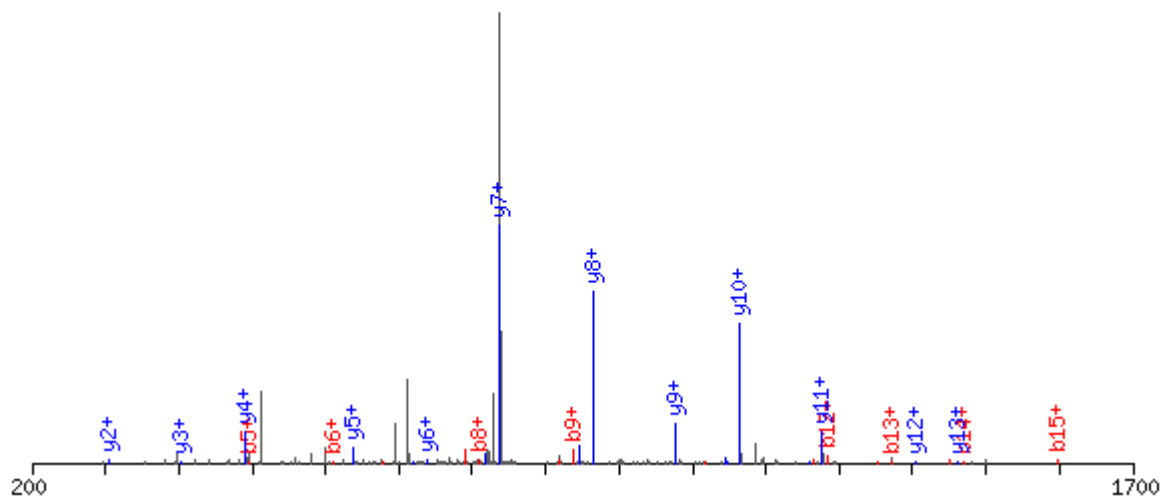

|   |    | b+      | -H2O    | y+      | -H2O    | -NH3    |    |   |
|---|----|---------|---------|---------|---------|---------|----|---|
| A | 1  | 72.04   |         |         |         |         | 16 | A |
| S | 2  | 239.04  | 221.03  | 1698.82 | 1680.81 | 1681.79 | 15 | S |
| A | 3  | 310.08  | 292.07  | 1531.82 | 1513.81 | 1514.80 | 14 | A |
| G | 4  | 367.10  | 349.09  | 1460.79 | 1442.78 | 1443.76 | 13 | G |
| Q | 5  | 495.16  | 477.15  | 1403.76 | 1385.75 | 1386.74 | 12 | Q |
| I | 6  | 608.24  | 590.23  | 1275.71 | 1257.70 | 1258.68 | 11 | I |
| S | 7  | 695.28  | 677.27  | 1162.62 | 1144.61 | 1145.59 | 10 | S |
| I | 8  | 808.36  | 790.35  | 1075.59 | 1057.58 | 1058.56 | 9  | I |
| Q | 9  | 936.42  | 918.41  | 962.51  | 944.49  | 945.48  | 8  | Q |
| P | 10 | 1033.47 | 1015.46 | 834.45  | 816.44  | 817.42  | 7  | P |
| T | 11 | 1134.52 | 1116.51 | 737.39  | 719.38  | 720.37  | 6  | T |
| F | 12 | 1281.59 | 1263.58 | 636.35  | 618.34  | 619.32  | 5  | F |
| S | 13 | 1368.62 | 1350.61 | 489.28  | 471.27  | 472.25  | 4  | S |
| V | 14 | 1467.69 | 1449.68 | 402.25  |         | 385.22  | 3  | V |
| Q | 15 | 1595.75 | 1577.74 | 303.18  |         | 286.15  | 2  | Q |
| R | 16 |         |         | 175.12  |         | 158.09  | 1  | R |

PR8 M1 28-47 unmodified

## LEDVFAGKNTDLEVLMEWLK

Charge: 3, Exp. m/z: 784.072, Calc. m/z: 784.071  
 Data File: B120210\_001\_120211144847, Scans: 6574 - 6574

Max Intensity: 4.21e+03

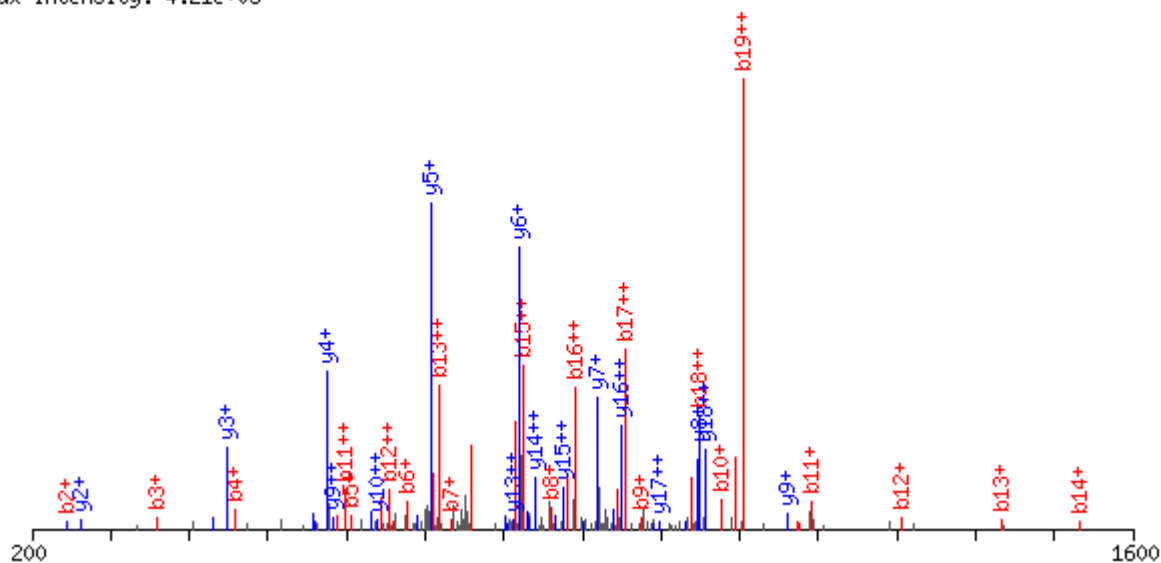

[Hiding fragment losses - Click to Show](#)

|   |    | b+      | b++     | y+      | y++     |    |   |
|---|----|---------|---------|---------|---------|----|---|
| L | 1  | 114.09  | 57.55   |         |         | 20 | L |
| E | 2  | 243.13  | 122.07  | 2237.12 | 1119.06 | 19 | E |
| D | 3  | 358.16  | 179.58  | 2108.07 | 1054.54 | 18 | D |
| V | 4  | 457.23  | 229.12  | 1993.05 | 997.03  | 17 | V |
| F | 5  | 604.30  | 302.65  | 1893.98 | 947.49  | 16 | F |
| A | 6  | 675.33  | 338.17  | 1746.91 | 873.96  | 15 | A |
| G | 7  | 732.36  | 366.68  | 1675.87 | 838.44  | 14 | G |
| K | 8  | 860.45  | 430.73  | 1618.85 | 809.93  | 13 | K |
| N | 9  | 974.49  | 487.75  | 1490.76 | 745.88  | 12 | N |
| T | 10 | 1075.54 | 538.27  | 1376.71 | 688.86  | 11 | T |
| D | 11 | 1190.57 | 595.79  | 1275.67 | 638.34  | 10 | D |
| L | 12 | 1303.65 | 652.33  | 1160.64 | 580.82  | 9  | L |
| E | 13 | 1432.70 | 716.85  | 1047.55 | 524.28  | 8  | E |
| V | 14 | 1531.76 | 766.39  | 918.51  | 459.76  | 7  | V |
| L | 15 | 1644.85 | 822.93  | 819.44  | 410.23  | 6  | L |
| M | 16 | 1775.89 | 888.45  | 706.36  | 353.68  | 5  | M |
| E | 17 | 1904.93 | 952.97  | 575.32  | 288.16  | 4  | E |
| W | 18 | 2091.01 | 1046.01 | 446.28  | 223.64  | 3  | W |
| L | 19 | 2204.09 | 1102.55 | 260.20  | 130.60  | 2  | L |
| K | 20 |         |         | 147.11  | 74.06   | 1  | K |

PR8 M1 28-47 phospho

LEDVFAGKNT(+79.97)DLEVLMEWLK

Charge: 3, Exp. m/z: 811.066, Calc. m/z: 810.727  
 Data File: B120210\_001\_120211144847, Scans: 6560 - 6560

Max Intensity: 5.42e+02

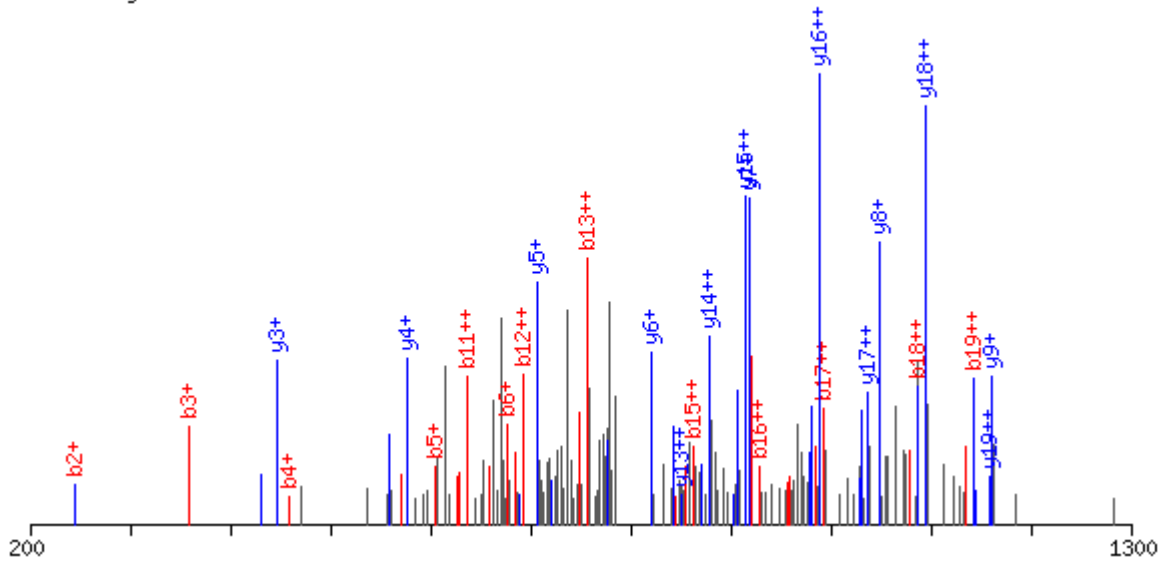

[Hiding fragment losses - Click to Show](#)

|   |    | b+      | b++     | y+      | y++     |    |   |
|---|----|---------|---------|---------|---------|----|---|
| L | 1  | 114.09  | 57.55   |         |         | 20 | L |
| E | 2  | 243.13  | 122.07  | 2317.08 | 1159.04 | 19 | E |
| D | 3  | 358.16  | 179.58  | 2188.04 | 1094.52 | 18 | D |
| V | 4  | 457.23  | 229.12  | 2073.01 | 1037.01 | 17 | V |
| F | 5  | 604.30  | 302.65  | 1973.94 | 987.48  | 16 | F |
| A | 6  | 675.33  | 338.17  | 1826.88 | 913.94  | 15 | A |
| G | 7  | 732.36  | 366.68  | 1755.84 | 878.42  | 14 | G |
| K | 8  | 860.45  | 430.73  | 1698.82 | 849.91  | 13 | K |
| N | 9  | 974.49  | 487.75  | 1570.72 | 785.86  | 12 | N |
| I | 10 | 1155.51 | 578.26  | 1456.68 | 728.84  | 11 | I |
| D | 11 | 1270.54 | 635.77  | 1275.67 | 638.34  | 10 | D |
| L | 12 | 1383.62 | 692.31  | 1160.64 | 580.82  | 9  | L |
| E | 13 | 1512.66 | 756.83  | 1047.55 | 524.28  | 8  | E |
| V | 14 | 1611.73 | 806.37  | 918.51  | 459.76  | 7  | V |
| L | 15 | 1724.81 | 862.91  | 819.44  | 410.23  | 6  | L |
| M | 16 | 1855.85 | 928.43  | 706.36  | 353.68  | 5  | M |
| E | 17 | 1984.90 | 992.95  | 575.32  | 288.16  | 4  | E |
| W | 18 | 2170.98 | 1085.99 | 446.28  | 223.64  | 3  | W |
| L | 19 | 2284.06 | 1142.53 | 260.20  | 130.60  | 2  | L |
| K | 20 |         |         | 147.11  | 74.06   | 1  | K |

B/Bris HA 134-151 unmodified

## LSTHNVINAENAPGGPYK

Charge: 3, Exp. m/z: 627.986, Calc. m/z: 627.987

Data File: D120713\_081, Scans: 12573 - 12573

Max Intensity: 1.11e+06

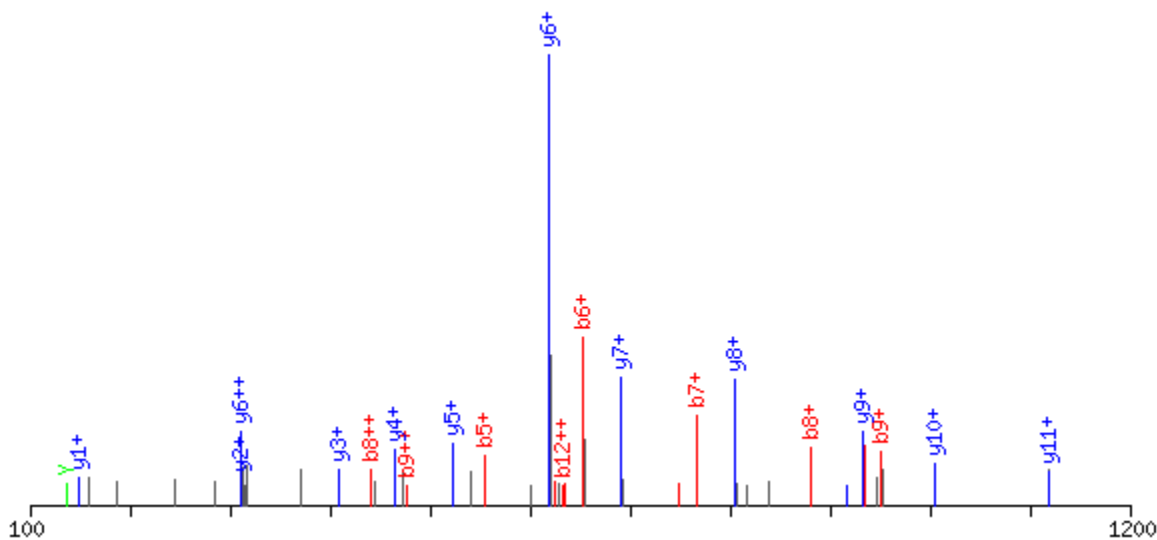[Hiding fragment losses - Click to Show](#)

|   |    | b+      | b++    | y+      | y++    |    |   |
|---|----|---------|--------|---------|--------|----|---|
| L | 1  | 114.09  | 57.55  |         |        | 18 | L |
| S | 2  | 201.12  | 101.07 | 1768.86 | 884.93 | 17 | S |
| T | 3  | 302.17  | 151.59 | 1681.83 | 841.42 | 16 | T |
| H | 4  | 439.23  | 220.12 | 1580.78 | 790.89 | 15 | H |
| N | 5  | 553.27  | 277.14 | 1443.72 | 722.36 | 14 | N |
| V | 6  | 652.34  | 326.67 | 1329.68 | 665.34 | 13 | V |
| I | 7  | 765.43  | 383.22 | 1230.61 | 615.81 | 12 | I |
| N | 8  | 879.47  | 440.24 | 1117.53 | 559.27 | 11 | N |
| A | 9  | 950.51  | 475.76 | 1003.48 | 502.25 | 10 | A |
| E | 10 | 1079.55 | 540.28 | 932.45  | 466.73 | 9  | E |
| N | 11 | 1193.59 | 597.30 | 803.40  | 402.21 | 8  | N |
| A | 12 | 1264.63 | 632.82 | 689.36  | 345.18 | 7  | A |
| P | 13 | 1361.68 | 681.34 | 618.32  | 309.67 | 6  | P |
| G | 14 | 1418.70 | 709.85 | 521.27  | 261.14 | 5  | G |
| G | 15 | 1475.72 | 738.37 | 464.25  | 232.63 | 4  | G |
| P | 16 | 1572.78 | 786.89 | 407.23  | 204.12 | 3  | P |
| Y | 17 | 1735.84 | 868.42 | 310.18  | 155.59 | 2  | Y |
| K | 18 |         |        | 147.11  | 74.06  | 1  | K |

B/Bris HA 134-151 phospho

## LST(+79.97)HNVINAENAPGGPYK

Charge: 3, Exp. m/z: 654.980, Calc. m/z: 654.644

Data File: D120713\_081, Scans: 12834 - 12834

Max Intensity: 9.20e+04

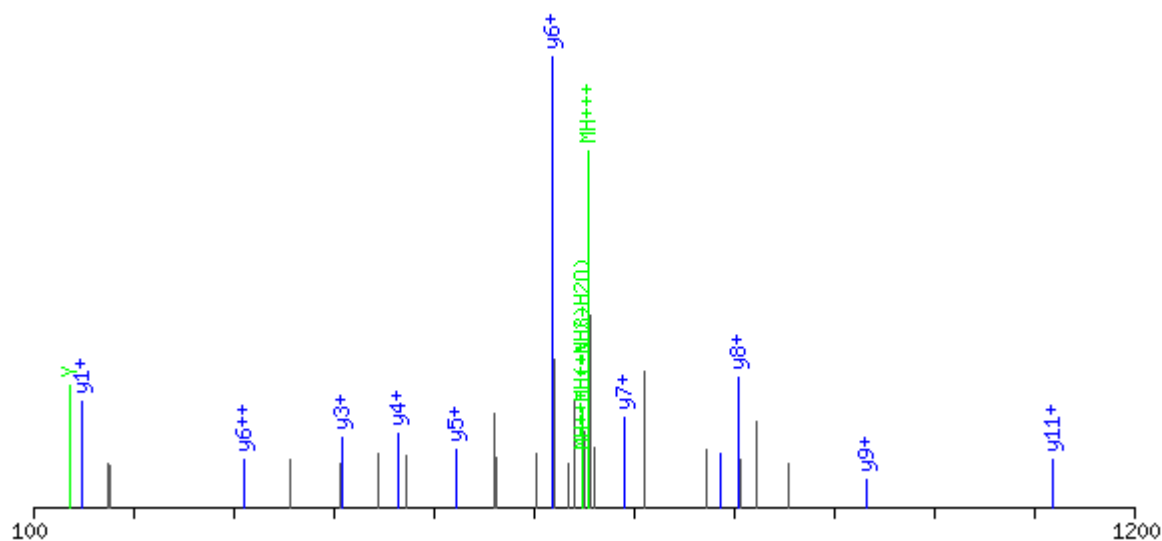[Hiding fragment losses - Click to Show](#)

|   |    | b+      | b++    | y+      | y++    |    |   |
|---|----|---------|--------|---------|--------|----|---|
| L | 1  | 114.09  | 57.55  |         |        | 18 | L |
| S | 2  | 201.12  | 101.07 | 1848.83 | 924.92 | 17 | S |
| I | 3  | 382.14  | 191.57 | 1761.80 | 881.40 | 16 | I |
| H | 4  | 519.20  | 260.10 | 1580.78 | 790.89 | 15 | H |
| N | 5  | 633.24  | 317.12 | 1443.72 | 722.36 | 14 | N |
| V | 6  | 732.31  | 366.66 | 1329.68 | 665.34 | 13 | V |
| I | 7  | 845.39  | 423.20 | 1230.61 | 615.81 | 12 | I |
| N | 8  | 959.43  | 480.22 | 1117.53 | 559.27 | 11 | N |
| A | 9  | 1030.47 | 515.74 | 1003.48 | 502.25 | 10 | A |
| E | 10 | 1159.51 | 580.26 | 932.45  | 466.73 | 9  | E |
| N | 11 | 1273.56 | 637.28 | 803.40  | 402.21 | 8  | N |
| A | 12 | 1344.59 | 672.80 | 689.36  | 345.18 | 7  | A |
| P | 13 | 1441.65 | 721.33 | 618.32  | 309.67 | 6  | P |
| G | 14 | 1498.67 | 749.84 | 521.27  | 261.14 | 5  | G |
| G | 15 | 1555.69 | 778.35 | 464.25  | 232.63 | 4  | G |
| P | 16 | 1652.74 | 826.88 | 407.23  | 204.12 | 3  | P |
| Y | 17 | 1815.81 | 908.41 | 310.18  | 155.59 | 2  | Y |
| K | 18 |         |        | 147.11  | 74.06  | 1  | K |

B/Bris HA 451-482 unmodified

## ADTISSQIELAVLLSNEGIINSEDEHLLALER

Charge: 3, Exp. m/z: 1164.940, Calc. m/z: 1164.941

Data File: edflowthruFBV30, Scans: 39598 - 39598

Max Intensity: 1.89e+04

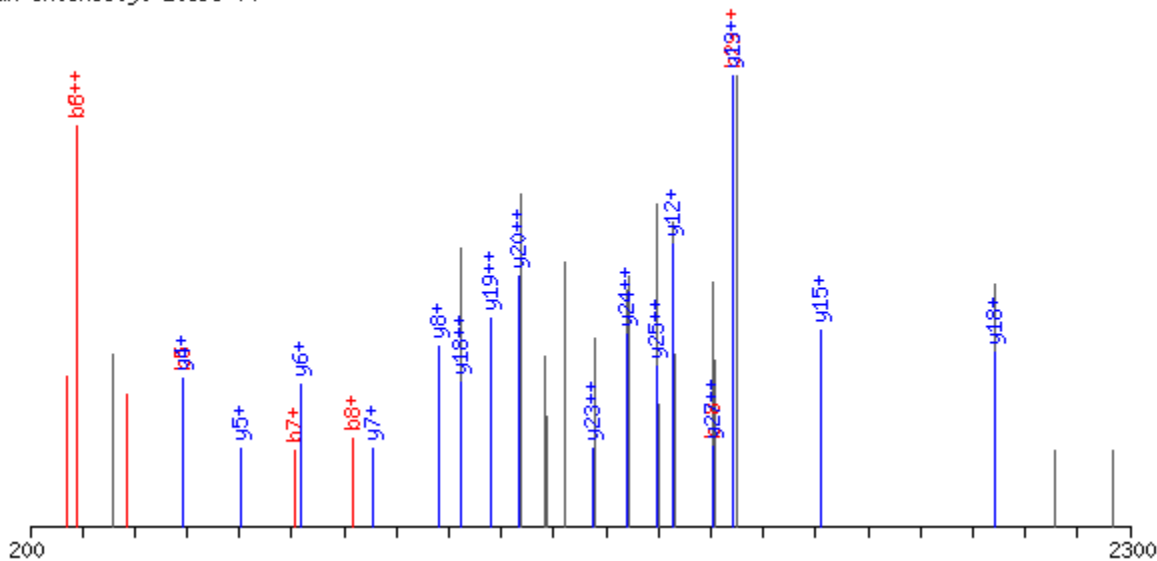[Hiding fragment losses - Click to Show](#)

|   |    | b+      | b++     | y+      | y++     |    |   |
|---|----|---------|---------|---------|---------|----|---|
| A | 1  | 72.04   | 36.53   |         |         | 32 | A |
| D | 2  | 187.07  | 94.04   | 3421.77 | 1711.39 | 31 | D |
| T | 3  | 288.12  | 144.56  | 3306.74 | 1653.88 | 30 | T |
| I | 4  | 401.20  | 201.11  | 3205.70 | 1603.35 | 29 | I |
| S | 5  | 488.24  | 244.62  | 3092.61 | 1546.81 | 28 | S |
| S | 6  | 575.27  | 288.14  | 3005.58 | 1503.29 | 27 | S |
| Q | 7  | 703.33  | 352.17  | 2918.55 | 1459.78 | 26 | Q |
| I | 8  | 816.41  | 408.71  | 2790.49 | 1395.75 | 25 | I |
| E | 9  | 945.45  | 473.23  | 2677.40 | 1339.21 | 24 | E |
| L | 10 | 1058.54 | 529.77  | 2548.36 | 1274.68 | 23 | L |
| A | 11 | 1129.57 | 565.29  | 2435.28 | 1218.14 | 22 | A |
| V | 12 | 1228.64 | 614.82  | 2364.24 | 1182.62 | 21 | V |
| L | 13 | 1341.73 | 671.37  | 2265.17 | 1133.09 | 20 | L |
| L | 14 | 1454.81 | 727.91  | 2152.09 | 1076.55 | 19 | L |
| S | 15 | 1541.84 | 771.42  | 2039.00 | 1020.01 | 18 | S |
| N | 16 | 1655.89 | 828.45  | 1951.97 | 976.49  | 17 | N |
| E | 17 | 1784.93 | 892.97  | 1837.93 | 919.47  | 16 | E |
| G | 18 | 1841.95 | 921.48  | 1708.89 | 854.95  | 15 | G |
| I | 19 | 1955.03 | 978.02  | 1651.86 | 826.44  | 14 | I |
| I | 20 | 2068.12 | 1034.56 | 1538.78 | 769.89  | 13 | I |
| N | 21 | 2182.16 | 1091.58 | 1425.70 | 713.35  | 12 | N |
| S | 22 | 2269.19 | 1135.10 | 1311.65 | 656.33  | 11 | S |
| E | 23 | 2398.23 | 1199.62 | 1224.62 | 612.81  | 10 | E |

|   |    | <b>b+</b> | <b>b++</b> | <b>y+</b> | <b>y++</b> |   |   |
|---|----|-----------|------------|-----------|------------|---|---|
| D | 24 | 2513.26   | 1257.13    | 1095.58   | 548.29     | 9 | D |
| E | 25 | 2642.30   | 1321.66    | 980.55    | 490.78     | 8 | E |
| H | 26 | 2779.36   | 1390.19    | 851.51    | 426.26     | 7 | H |
| L | 27 | 2892.45   | 1446.73    | 714.45    | 357.73     | 6 | L |
| L | 28 | 3005.53   | 1503.27    | 601.37    | 301.19     | 5 | L |
| A | 29 | 3076.57   | 1538.79    | 488.28    | 244.65     | 4 | A |
| L | 30 | 3189.65   | 1595.33    | 417.25    | 209.13     | 3 | L |
| E | 31 | 3318.70   | 1659.85    | 304.16    | 152.58     | 2 | E |
| R | 32 |           |            | 175.12    | 88.06      | 1 | R |





|   |    | <b>b+</b> | <b>b++</b> | <b>y+</b> | <b>y++</b> |   |   |
|---|----|-----------|------------|-----------|------------|---|---|
| D | 24 | 2593.23   | 1297.12    | 1095.58   | 548.29     | 9 | D |
| E | 25 | 2722.27   | 1361.64    | 980.55    | 490.78     | 8 | E |
| H | 26 | 2859.33   | 1430.17    | 851.51    | 426.26     | 7 | H |
| L | 27 | 2972.41   | 1486.71    | 714.45    | 357.73     | 6 | L |
| L | 28 | 3085.50   | 1543.25    | 601.37    | 301.19     | 5 | L |
| A | 29 | 3156.53   | 1578.77    | 488.28    | 244.65     | 4 | A |
| L | 30 | 3269.62   | 1635.31    | 417.25    | 209.13     | 3 | L |
| E | 31 | 3398.66   | 1699.83    | 304.16    | 152.58     | 2 | E |
| R | 32 |           |            | 175.12    | 88.06      | 1 | R |

**B/Bris NP 48-64 unmodified**

### NSPERATTSSEDDVGR

Charge: 3, Exp. m/z: 606.613, Calc. m/z: 606.617

Data File: D120713\_002, Scans: 7901 - 7901

Max Intensity: 1.32e+05

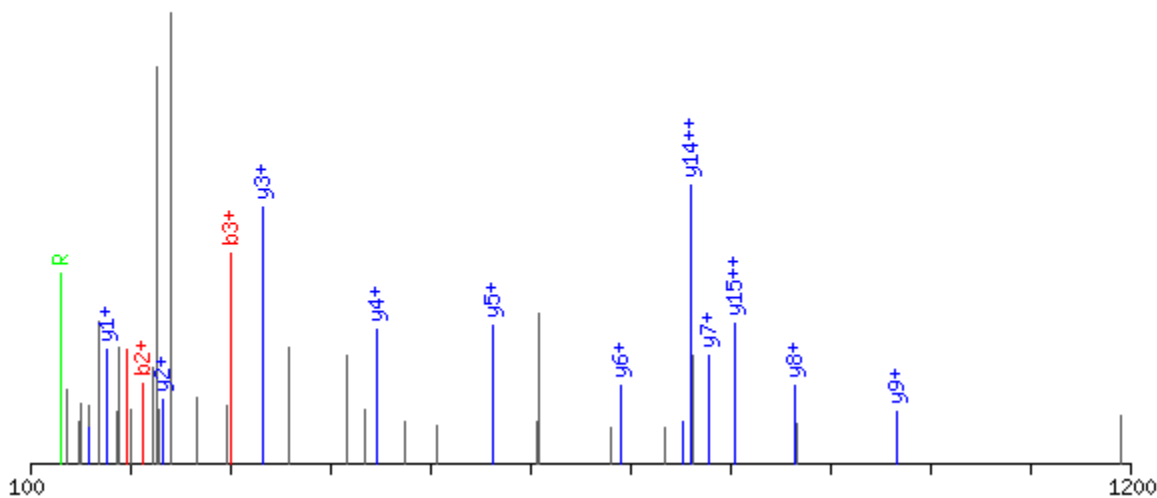

[Hiding fragment losses - Click to Show](#)

|   |    | <b>b+</b> | <b>b++</b> | <b>y+</b> | <b>y++</b> |    |   |
|---|----|-----------|------------|-----------|------------|----|---|
| N | 1  | 115.05    | 58.03      |           |            | 17 | N |
| P | 2  | 212.10    | 106.56     | 1703.78   | 852.40     | 16 | P |
| S | 3  | 299.13    | 150.07     | 1606.73   | 803.87     | 15 | S |
| P | 4  | 396.19    | 198.60     | 1519.70   | 760.35     | 14 | P |
| E | 5  | 525.23    | 263.12     | 1422.65   | 711.83     | 13 | E |
| R | 6  | 681.33    | 341.17     | 1293.60   | 647.31     | 12 | R |
| A | 7  | 752.37    | 376.69     | 1137.50   | 569.25     | 11 | A |
| T | 8  | 853.42    | 427.21     | 1066.46   | 533.74     | 10 | T |
| T | 9  | 954.46    | 477.74     | 965.42    | 483.21     | 9  | T |
| S | 10 | 1041.50   | 521.25     | 864.37    | 432.69     | 8  | S |
| S | 11 | 1128.53   | 564.77     | 777.34    | 389.17     | 7  | S |
| E | 12 | 1257.57   | 629.29     | 690.31    | 345.66     | 6  | E |
| D | 13 | 1372.60   | 686.80     | 561.26    | 281.14     | 5  | D |
| D | 14 | 1487.62   | 744.32     | 446.24    | 223.62     | 4  | D |
| V | 15 | 1586.69   | 793.85     | 331.21    | 166.11     | 3  | V |
| G | 16 | 1643.71   | 822.36     | 232.14    | 116.57     | 2  | G |
| R | 17 |           |            | 175.12    | 88.06      | 1  | R |



## B/Bris NP 46-64 phospho

## TRNPS(+79.97)PERATTSSDDVGR

Charge: 3, Exp. m/z: 718.985, Calc. m/z: 718.987

Data File: B120210\_017, Scans: 2388 - 2388

Max Intensity: 3.63e+04

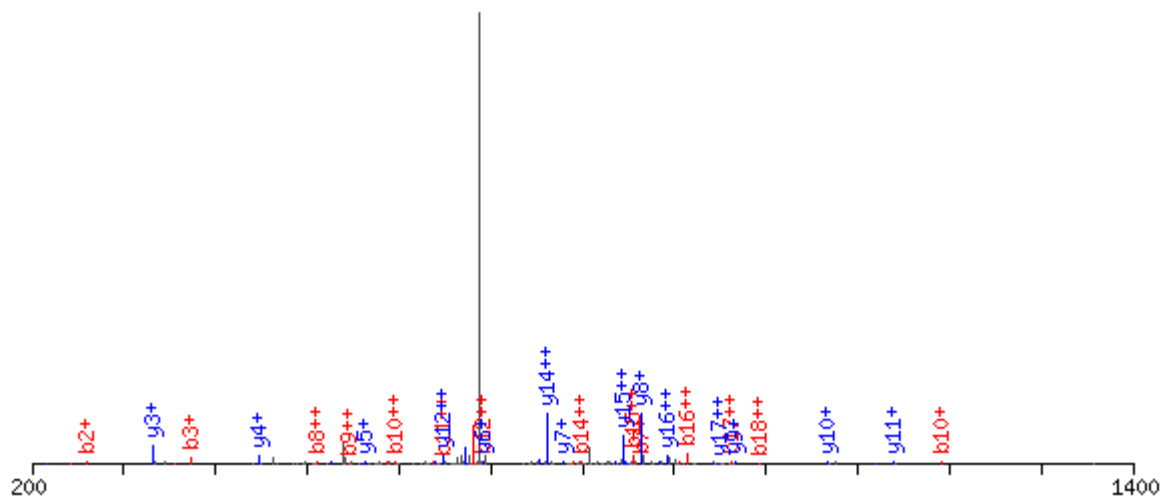[Hiding fragment losses - Click to Show](#)

|   |    | b+      | b++    | y+      | y++     |    |   |
|---|----|---------|--------|---------|---------|----|---|
| T | 1  | 102.05  | 51.53  |         |         | 19 | T |
| R | 2  | 258.16  | 129.58 | 2053.89 | 1027.45 | 18 | R |
| N | 3  | 372.20  | 186.60 | 1897.79 | 949.40  | 17 | N |
| P | 4  | 469.25  | 235.13 | 1783.75 | 892.38  | 16 | P |
| S | 5  | 636.25  | 318.63 | 1686.70 | 843.85  | 15 | S |
| P | 6  | 733.30  | 367.16 | 1519.70 | 760.35  | 14 | P |
| E | 7  | 862.35  | 431.68 | 1422.65 | 711.83  | 13 | E |
| R | 8  | 1018.45 | 509.73 | 1293.60 | 647.31  | 12 | R |
| A | 9  | 1089.48 | 545.25 | 1137.50 | 569.25  | 11 | A |
| T | 10 | 1190.53 | 595.77 | 1066.46 | 533.74  | 10 | T |
| T | 11 | 1291.58 | 646.29 | 965.42  | 483.21  | 9  | T |
| S | 12 | 1378.61 | 689.81 | 864.37  | 432.69  | 8  | S |
| S | 13 | 1465.64 | 733.33 | 777.34  | 389.17  | 7  | S |
| E | 14 | 1594.69 | 797.85 | 690.31  | 345.66  | 6  | E |
| D | 15 | 1709.71 | 855.36 | 561.26  | 281.14  | 5  | D |
| D | 16 | 1824.74 | 912.87 | 446.24  | 223.62  | 4  | D |
| V | 17 | 1923.81 | 962.41 | 331.21  | 166.11  | 3  | V |
| G | 18 | 1980.83 | 990.92 | 232.14  | 116.57  | 2  | G |
| R | 19 |         |        | 175.12  | 88.06   | 1  | R |

B/Bris NP 48-65 phospho

NPSPERAT(+79.97)TSSEDDVGRK

Charge: 3, Exp. m/z: 675.967, Calc. m/z: 675.967

Data File: B120210\_017, Scans: 2364 - 2364

Max Intensity: 6.44e+03

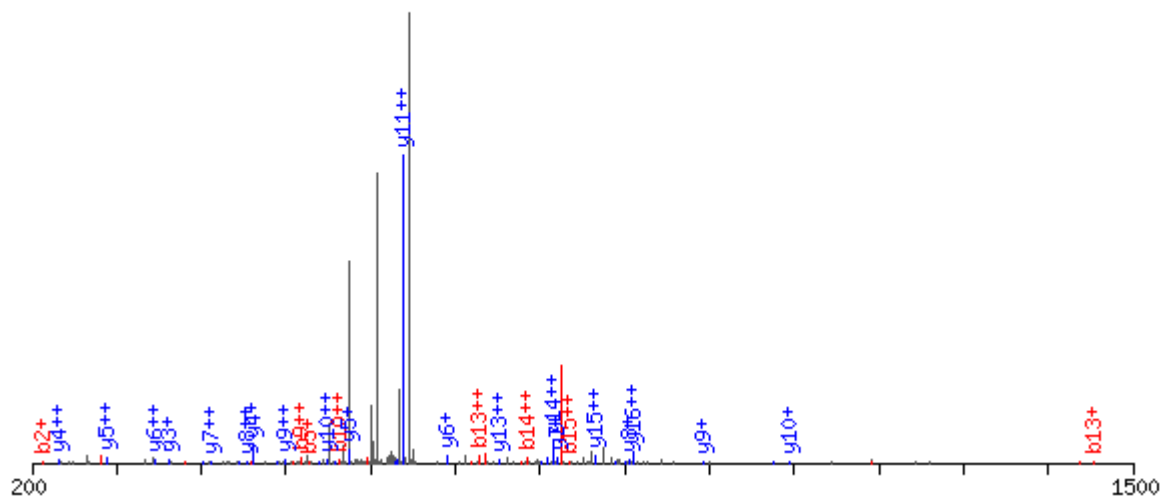[Hiding fragment losses - Click to Show](#)

|   |    | b+      | b++    | y+      | y++    |    |   |
|---|----|---------|--------|---------|--------|----|---|
| N | 1  | 115.05  | 58.03  |         |        | 18 | N |
| P | 2  | 212.10  | 106.56 | 1911.84 | 956.43 | 17 | P |
| S | 3  | 299.13  | 150.07 | 1814.79 | 907.90 | 16 | S |
| P | 4  | 396.19  | 198.60 | 1727.76 | 864.38 | 15 | P |
| E | 5  | 525.23  | 263.12 | 1630.71 | 815.86 | 14 | E |
| R | 6  | 681.33  | 341.17 | 1501.66 | 751.34 | 13 | R |
| A | 7  | 752.37  | 376.69 | 1345.56 | 673.29 | 12 | A |
| I | 8  | 933.38  | 467.19 | 1274.53 | 637.77 | 11 | I |
| T | 9  | 1034.43 | 517.72 | 1093.51 | 547.26 | 10 | T |
| S | 10 | 1121.46 | 561.23 | 992.46  | 496.74 | 9  | S |
| S | 11 | 1208.49 | 604.75 | 905.43  | 453.22 | 8  | S |
| E | 12 | 1337.54 | 669.27 | 818.40  | 409.70 | 7  | E |
| D | 13 | 1452.56 | 726.79 | 689.36  | 345.18 | 6  | D |
| D | 14 | 1567.59 | 784.30 | 574.33  | 287.67 | 5  | D |
| V | 15 | 1666.66 | 833.83 | 459.30  | 230.16 | 4  | V |
| G | 16 | 1723.68 | 862.34 | 360.24  | 180.62 | 3  | G |
| R | 17 | 1879.78 | 940.39 | 303.21  | 152.11 | 2  | R |
| K | 18 |         |        | 147.11  | 74.06  | 1  | K |

B/Bris NP 54-64 unmodified

## ATTSEDDVGR

Charge: 2, Exp. m/z: 569.250, Calc. m/z: 569.257

Data File: D120713\_003, Scans: 6302 - 6302

Max Intensity: 6.14e+04

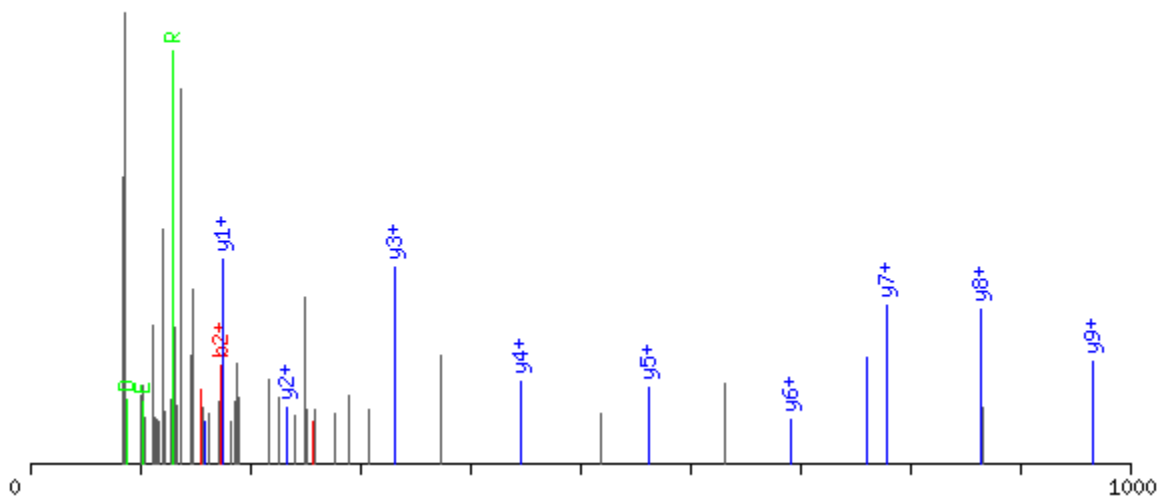

|   |    | b+     | -H2O   | y+      | -H2O    | -NH3    |    |   |
|---|----|--------|--------|---------|---------|---------|----|---|
| A | 1  | 72.04  |        |         |         |         | 11 | A |
| T | 2  | 173.09 | 155.08 | 1066.46 | 1048.45 | 1049.44 | 10 | T |
| T | 3  | 274.14 | 256.13 | 966.42  | 947.41  | 948.39  | 9  | T |
| S | 4  | 361.17 | 343.16 | 864.37  | 846.36  | 847.34  | 8  | S |
| S | 5  | 448.20 | 430.19 | 777.34  | 759.33  | 760.31  | 7  | S |
| E | 6  | 577.25 | 559.24 | 690.31  | 672.29  | 673.28  | 6  | E |
| D | 7  | 692.27 | 674.26 | 561.26  | 543.25  | 544.24  | 5  | D |
| D | 8  | 807.30 | 789.29 | 446.24  | 428.23  | 429.21  | 4  | D |
| V | 9  | 906.37 | 888.36 | 331.21  |         | 314.18  | 3  | V |
| G | 10 | 963.39 | 945.38 | 232.14  |         | 215.11  | 2  | G |
| R | 11 |        |        | 175.12  |         | 158.09  | 1  | R |

B/Bris NP 54-64 phospho

### ATTS(+79.97)SEDDVGR

Charge: 2, Exp. m/z: 609.237, Calc. m/z: 609.242  
 Data File: D120713\_002, Scans: 7282 - 7282

Max Intensity: 5.09e+05

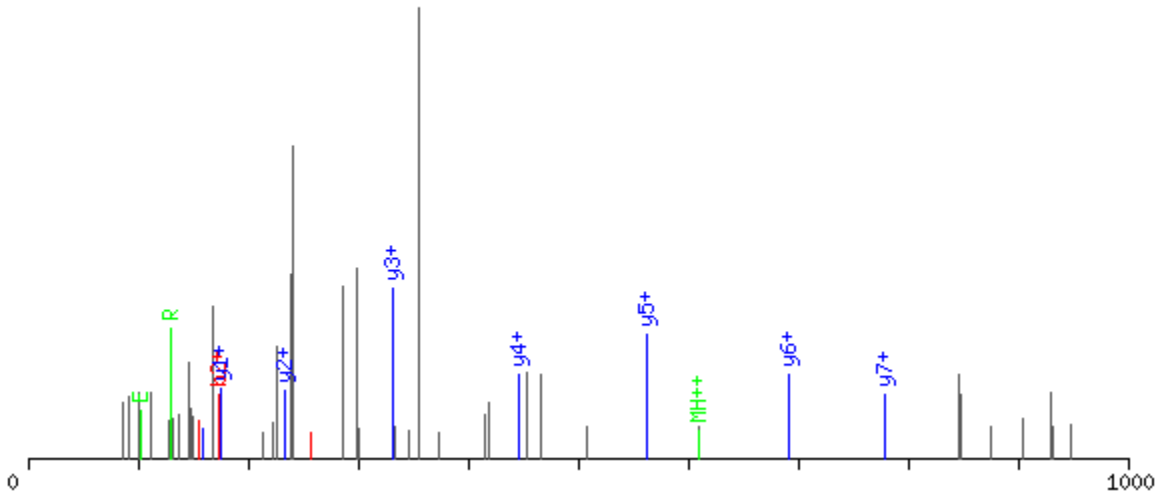

|   |    | b+      | -H2O    | y+      | -H2O    | -NH3    |    |   |
|---|----|---------|---------|---------|---------|---------|----|---|
| A | 1  | 72.04   |         |         |         |         | 11 | A |
| T | 2  | 173.09  | 155.08  | 1146.43 | 1128.42 | 1129.40 | 10 | T |
| T | 3  | 274.14  | 256.13  | 1045.38 | 1027.37 | 1028.36 | 9  | T |
| S | 4  | 441.14  | 423.13  | 944.34  | 926.33  | 927.31  | 8  | S |
| S | 5  | 528.17  | 510.16  | 777.34  | 759.33  | 760.31  | 7  | S |
| E | 6  | 657.21  | 639.20  | 690.31  | 672.29  | 673.28  | 6  | E |
| D | 7  | 772.24  | 754.23  | 561.26  | 543.25  | 544.24  | 5  | D |
| D | 8  | 887.27  | 869.26  | 446.24  | 428.23  | 429.21  | 4  | D |
| V | 9  | 986.34  | 968.32  | 331.21  |         | 314.18  | 3  | V |
| G | 10 | 1043.36 | 1025.35 | 232.14  |         | 215.11  | 2  | G |
| R | 11 |         |         | 175.12  |         | 158.09  | 1  | R |



**B/Bris NP 218-235 unmodified**

### VGLDPSLISTFAGSTVPR

Charge: 2, Exp. m/z: 909.000, Calc. m/z: 908.997

Data File: edflowthruFBV30, Scans: 25823 - 25823

Max Intensity: 2.62e+05

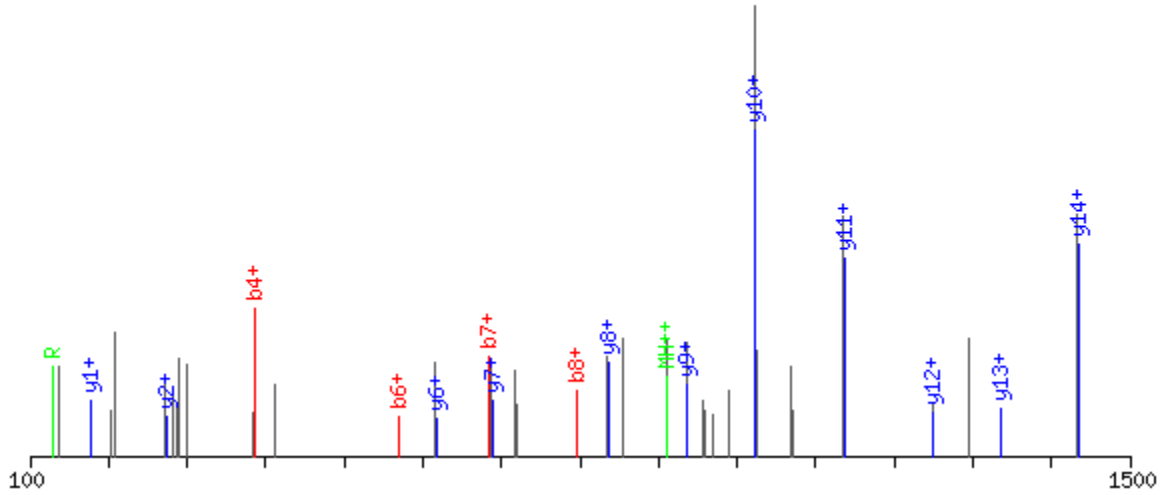

|   |    | b+      | -H2O    | y+      | -H2O    | -NH3    |    |   |
|---|----|---------|---------|---------|---------|---------|----|---|
| V | 1  | 100.08  |         |         |         |         | 18 | V |
| G | 2  | 157.10  |         | 1717.91 | 1699.90 | 1700.89 | 17 | G |
| L | 3  | 270.18  |         | 1660.89 | 1642.88 | 1643.86 | 16 | L |
| D | 4  | 385.21  | 367.20  | 1547.81 | 1529.80 | 1530.78 | 15 | D |
| P | 5  | 482.26  | 464.25  | 1432.78 | 1414.77 | 1415.75 | 14 | P |
| S | 6  | 569.29  | 551.28  | 1335.73 | 1317.72 | 1318.70 | 13 | S |
| L | 7  | 682.38  | 664.37  | 1248.69 | 1230.68 | 1231.67 | 12 | L |
| I | 8  | 795.46  | 777.45  | 1135.61 | 1117.60 | 1118.58 | 11 | I |
| S | 9  | 882.49  | 864.48  | 1022.53 | 1004.52 | 1005.50 | 10 | S |
| T | 10 | 983.54  | 965.53  | 935.49  | 917.48  | 918.47  | 9  | T |
| F | 11 | 1130.61 | 1112.60 | 834.45  | 816.44  | 817.42  | 8  | F |
| A | 12 | 1201.65 | 1183.64 | 687.38  | 669.37  | 670.35  | 7  | A |
| G | 13 | 1258.67 | 1240.66 | 616.34  | 598.33  | 599.31  | 6  | G |
| S | 14 | 1345.70 | 1327.69 | 559.32  | 541.31  | 542.29  | 5  | S |
| T | 15 | 1446.75 | 1428.74 | 472.29  | 454.28  | 455.26  | 4  | T |
| V | 16 | 1545.82 | 1527.81 | 371.24  |         | 354.21  | 3  | V |
| P | 17 | 1642.87 | 1624.86 | 272.17  |         | 255.15  | 2  | P |
| R | 18 |         |         | 175.12  |         | 158.09  | 1  | R |

B/Bris NP 218-235 phospho

## VGLDPS(+79.97)LISTFAGSTVPR

Charge: 2, Exp. m/z: 949.480, Calc. m/z: 948.977

Data File: D120713\_079, Scans: 13241 - 13241

Max Intensity: 1.82e+04

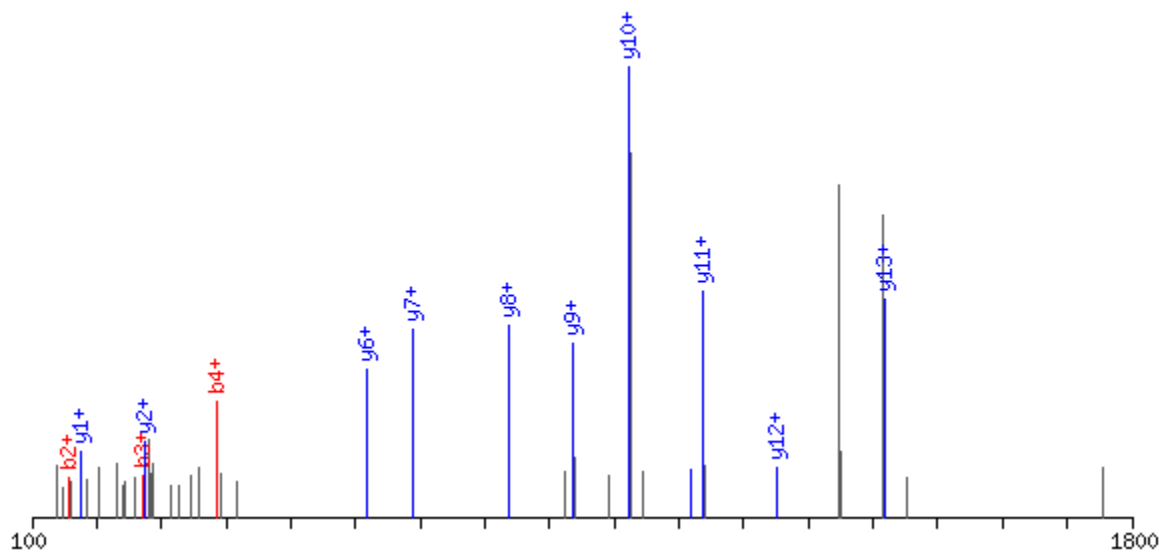

|   |    | b+      | -H2O    | y+      | -H2O    | -NH3    |    |   |
|---|----|---------|---------|---------|---------|---------|----|---|
| V | 1  | 100.08  |         |         |         |         | 18 | V |
| G | 2  | 157.10  |         | 1797.88 | 1779.87 | 1780.85 | 17 | G |
| L | 3  | 270.18  |         | 1740.86 | 1722.85 | 1723.83 | 16 | L |
| D | 4  | 385.21  | 367.20  | 1627.77 | 1609.76 | 1610.75 | 15 | D |
| P | 5  | 482.26  | 464.25  | 1512.75 | 1494.74 | 1495.72 | 14 | P |
| S | 6  | 649.26  | 631.25  | 1415.69 | 1397.68 | 1398.67 | 13 | S |
| L | 7  | 762.34  | 744.33  | 1248.69 | 1230.68 | 1231.67 | 12 | L |
| I | 8  | 875.43  | 857.42  | 1135.61 | 1117.60 | 1118.58 | 11 | I |
| S | 9  | 962.46  | 944.45  | 1022.53 | 1004.52 | 1005.50 | 10 | S |
| T | 10 | 1063.51 | 1045.50 | 935.49  | 917.48  | 918.47  | 9  | T |
| F | 11 | 1210.58 | 1192.56 | 834.45  | 816.44  | 817.42  | 8  | F |
| A | 12 | 1281.61 | 1263.60 | 687.38  | 669.37  | 670.35  | 7  | A |
| G | 13 | 1338.63 | 1320.62 | 616.34  | 598.33  | 599.31  | 6  | G |
| S | 14 | 1425.67 | 1407.66 | 559.32  | 541.31  | 542.29  | 5  | S |
| T | 15 | 1526.71 | 1508.70 | 472.29  | 454.28  | 455.26  | 4  | T |
| V | 16 | 1625.78 | 1607.77 | 371.24  |         | 354.21  | 3  | V |
| P | 17 | 1722.83 | 1704.82 | 272.17  |         | 255.15  | 2  | P |
| R | 18 |         |         | 175.12  |         | 158.09  | 1  | R |

B/Bris NP 342-373 unmodified

## IPQLGFNVEEYSMVGYEAMALYNMATPVSILR

Charge: 3, Exp. m/z: 1203.600, Calc. m/z: 1202.927

Data File: D120713\_081, Scans: 30063 - 30063

Max Intensity: 2.61e+04

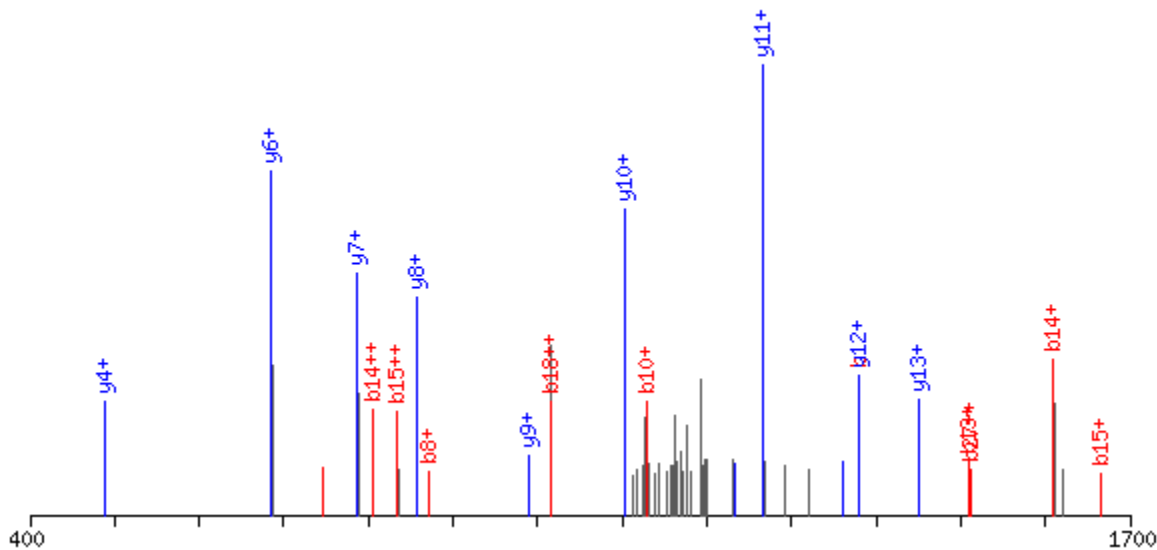[Hiding fragment losses - Click to Show](#)

|   |    | b+      | b++     | y+      | y++     |    |   |
|---|----|---------|---------|---------|---------|----|---|
| I | 1  | 114.09  | 57.55   |         |         | 32 | I |
| P | 2  | 211.14  | 106.08  | 3493.68 | 1747.35 | 31 | P |
| Q | 3  | 339.20  | 170.10  | 3396.63 | 1698.82 | 30 | Q |
| L | 4  | 452.29  | 226.65  | 3268.57 | 1634.79 | 29 | L |
| G | 5  | 509.31  | 255.16  | 3155.49 | 1578.25 | 28 | G |
| F | 6  | 656.38  | 328.69  | 3098.47 | 1549.74 | 27 | F |
| N | 7  | 770.42  | 385.71  | 2951.40 | 1476.20 | 26 | N |
| V | 8  | 869.49  | 435.25  | 2837.36 | 1419.18 | 25 | V |
| E | 9  | 998.53  | 499.77  | 2738.29 | 1369.65 | 24 | E |
| E | 10 | 1127.57 | 564.29  | 2609.24 | 1305.13 | 23 | E |
| Y | 11 | 1290.64 | 645.82  | 2480.20 | 1240.60 | 22 | Y |
| S | 12 | 1377.67 | 689.34  | 2317.14 | 1159.07 | 21 | S |
| M | 13 | 1508.71 | 754.86  | 2230.11 | 1115.56 | 20 | M |
| V | 14 | 1607.78 | 804.39  | 2099.07 | 1050.04 | 19 | V |
| G | 15 | 1664.80 | 832.90  | 2000.00 | 1000.50 | 18 | G |
| Y | 16 | 1827.86 | 914.43  | 1942.98 | 971.99  | 17 | Y |
| E | 17 | 1956.90 | 978.96  | 1779.91 | 890.46  | 16 | E |
| A | 18 | 2027.94 | 1014.47 | 1650.87 | 825.94  | 15 | A |
| M | 19 | 2158.98 | 1079.99 | 1579.83 | 790.42  | 14 | M |
| A | 20 | 2230.02 | 1115.51 | 1448.79 | 724.90  | 13 | A |
| L | 21 | 2343.10 | 1172.06 | 1377.76 | 689.38  | 12 | L |
| Y | 22 | 2506.17 | 1253.59 | 1264.67 | 632.84  | 11 | Y |
| N | 23 | 2620.21 | 1310.61 | 1101.61 | 551.31  | 10 | N |

|   |    | <b>b+</b> | <b>b++</b>              | <b>y+</b>              | <b>y++</b> |   |   |
|---|----|-----------|-------------------------|------------------------|------------|---|---|
| M | 24 | 2751.25   | 1376.13                 | <a href="#">987.57</a> | 494.29     | 9 | M |
| A | 25 | 2822.29   | 1411.65                 | <a href="#">856.53</a> | 428.77     | 8 | A |
| T | 26 | 2923.34   | 1462.17                 | <a href="#">785.49</a> | 393.25     | 7 | T |
| P | 27 | 3020.39   | <a href="#">1510.70</a> | <a href="#">684.44</a> | 342.72     | 6 | P |
| V | 28 | 3119.46   | 1560.23                 | 587.39                 | 294.20     | 5 | V |
| S | 29 | 3206.49   | 1603.75                 | <a href="#">488.32</a> | 244.66     | 4 | S |
| I | 30 | 3319.57   | 1660.29                 | 401.29                 | 201.15     | 3 | I |
| L | 31 | 3432.66   | 1716.83                 | 288.20                 | 144.61     | 2 | L |
| R | 32 |           |                         | 175.12                 | 88.06      | 1 | R |

B/Bris NP 342-373 phospho

## IPQLGFNVEEY(+79.97)SMVGYEAMALYNMATPVSILR

Charge: 3, Exp. m/z: 1229.920, Calc. m/z: 1229.581

Data File: D120713\_081, Scans: 27112 - 27112

Max Intensity: 7.14e+04

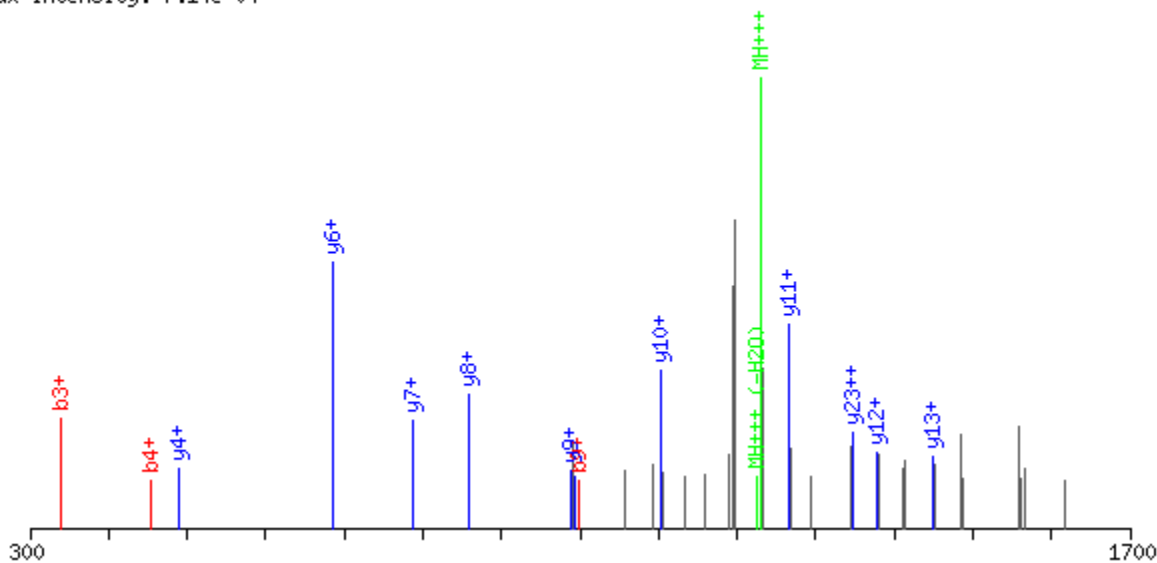[Hiding fragment losses - Click to Show](#)

|          |    | b+      | b++     | y+      | y++     |    |          |
|----------|----|---------|---------|---------|---------|----|----------|
| I        | 1  | 114.09  | 57.55   |         |         | 32 | I        |
| P        | 2  | 211.14  | 106.08  | 3573.65 | 1787.33 | 31 | P        |
| Q        | 3  | 339.20  | 170.10  | 3476.60 | 1738.80 | 30 | Q        |
| L        | 4  | 452.29  | 226.65  | 3348.54 | 1674.77 | 29 | L        |
| G        | 5  | 509.31  | 255.16  | 3235.45 | 1618.23 | 28 | G        |
| F        | 6  | 656.38  | 328.69  | 3178.43 | 1589.72 | 27 | F        |
| N        | 7  | 770.42  | 385.71  | 3031.37 | 1516.19 | 26 | N        |
| V        | 8  | 869.49  | 435.25  | 2917.32 | 1459.16 | 25 | V        |
| E        | 9  | 998.53  | 499.77  | 2818.25 | 1409.63 | 24 | E        |
| E        | 10 | 1127.57 | 564.29  | 2689.21 | 1345.11 | 23 | E        |
| <u>Y</u> | 11 | 1370.60 | 685.81  | 2560.17 | 1280.59 | 22 | <u>Y</u> |
| S        | 12 | 1457.63 | 729.32  | 2317.14 | 1159.07 | 21 | S        |
| M        | 13 | 1588.68 | 794.84  | 2230.11 | 1115.56 | 20 | M        |
| V        | 14 | 1687.74 | 844.38  | 2099.07 | 1050.04 | 19 | V        |
| G        | 15 | 1744.77 | 872.89  | 2000.00 | 1000.50 | 18 | G        |
| Y        | 16 | 1907.83 | 954.42  | 1942.98 | 971.99  | 17 | Y        |
| E        | 17 | 2036.87 | 1018.94 | 1779.91 | 890.46  | 16 | E        |
| A        | 18 | 2107.91 | 1054.46 | 1650.87 | 825.94  | 15 | A        |
| M        | 19 | 2238.95 | 1119.98 | 1579.83 | 790.42  | 14 | M        |
| A        | 20 | 2309.99 | 1155.50 | 1448.79 | 724.90  | 13 | A        |
| L        | 21 | 2423.07 | 1212.04 | 1377.76 | 689.38  | 12 | L        |
| Y        | 22 | 2586.13 | 1293.57 | 1264.67 | 632.84  | 11 | Y        |
| N        | 23 | 2700.18 | 1350.59 | 1101.61 | 551.31  | 10 | N        |

|   |    | <b>b+</b> | <b>b++</b> | <b>y+</b>              | <b>y++</b> |   |   |
|---|----|-----------|------------|------------------------|------------|---|---|
| M | 24 | 2831.22   | 1416.11    | <a href="#">987.57</a> | 494.29     | 9 | M |
| A | 25 | 2902.25   | 1451.63    | <a href="#">856.53</a> | 428.77     | 8 | A |
| T | 26 | 3003.30   | 1502.15    | <a href="#">785.49</a> | 393.25     | 7 | T |
| P | 27 | 3100.35   | 1550.68    | <a href="#">684.44</a> | 342.72     | 6 | P |
| V | 28 | 3199.42   | 1600.21    | 587.39                 | 294.20     | 5 | V |
| S | 29 | 3286.45   | 1643.73    | <a href="#">488.32</a> | 244.66     | 4 | S |
| I | 30 | 3399.54   | 1700.27    | 401.29                 | 201.15     | 3 | I |
| L | 31 | 3512.62   | 1756.82    | 288.20                 | 144.61     | 2 | L |
| R | 32 |           |            | 175.12                 | 88.06      | 1 | R |

B/Bris NP 448-478 carbamidomethyl

## SGGNEVGGDGGSGQISC(+57.02)SPVFAVERPIALSK

Charge: 3, Exp. m/z: 1011.490, Calc. m/z: 1011.494

Data File: D120713\_079, Scans: 13567 - 13567

Max Intensity: 1.95e+04

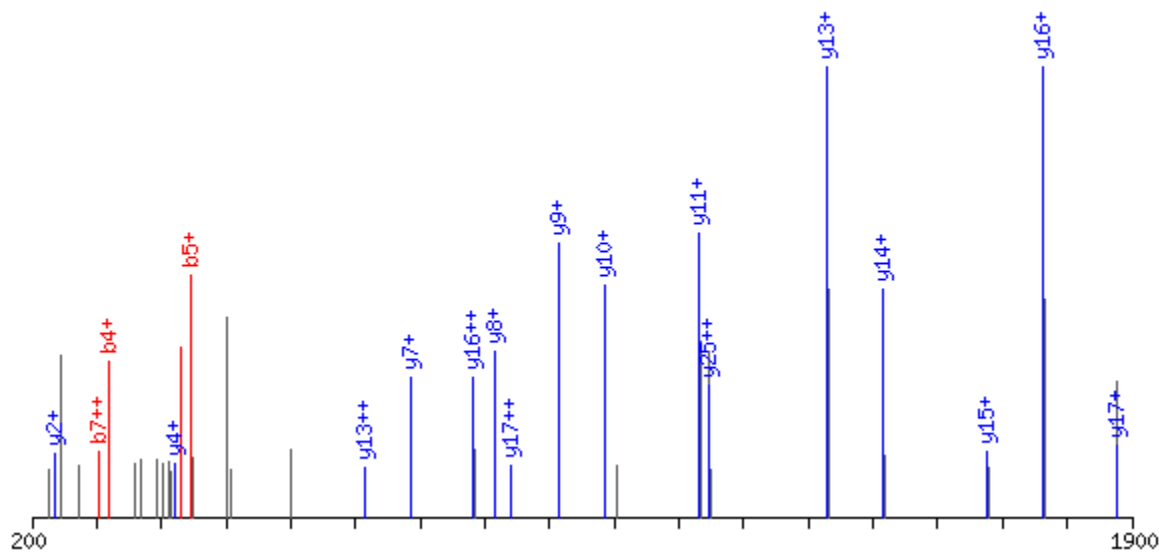[Hiding fragment losses - Click to Show](#)

|   |    | b+      | b++     | y+      | y++     |    |   |
|---|----|---------|---------|---------|---------|----|---|
| S | 1  | 88.04   | 44.52   |         |         | 31 | S |
| G | 2  | 145.06  | 73.03   | 2945.44 | 1473.22 | 30 | G |
| G | 3  | 202.08  | 101.54  | 2888.42 | 1444.71 | 29 | G |
| N | 4  | 316.13  | 158.57  | 2831.40 | 1416.20 | 28 | N |
| E | 5  | 445.17  | 223.09  | 2717.36 | 1359.18 | 27 | E |
| V | 6  | 544.24  | 272.62  | 2588.31 | 1294.66 | 26 | V |
| G | 7  | 601.26  | 301.13  | 2489.25 | 1245.13 | 25 | G |
| G | 8  | 658.28  | 329.64  | 2432.22 | 1216.62 | 24 | G |
| D | 9  | 773.31  | 387.16  | 2375.20 | 1188.10 | 23 | D |
| G | 10 | 830.33  | 415.67  | 2260.18 | 1130.59 | 22 | G |
| G | 11 | 887.35  | 444.18  | 2203.15 | 1102.08 | 21 | G |
| S | 12 | 974.38  | 487.69  | 2146.13 | 1073.57 | 20 | S |
| G | 13 | 1031.40 | 516.20  | 2059.10 | 1030.05 | 19 | G |
| Q | 14 | 1159.46 | 580.23  | 2002.08 | 1001.54 | 18 | Q |
| I | 15 | 1272.55 | 636.78  | 1874.02 | 937.51  | 17 | I |
| S | 16 | 1359.58 | 680.29  | 1760.94 | 880.97  | 16 | S |
| C | 17 | 1519.61 | 760.31  | 1673.90 | 837.46  | 15 | C |
| S | 18 | 1606.64 | 803.82  | 1513.87 | 757.44  | 14 | S |
| P | 19 | 1703.69 | 852.35  | 1426.84 | 713.92  | 13 | P |
| V | 20 | 1802.76 | 901.88  | 1329.79 | 665.40  | 12 | V |
| F | 21 | 1949.83 | 975.42  | 1230.72 | 615.86  | 11 | F |
| A | 22 | 2020.87 | 1010.94 | 1083.65 | 542.33  | 10 | A |
| V | 23 | 2119.93 | 1060.47 | 1012.61 | 506.81  | 9  | V |

|   |    | <b>b+</b> | <b>b++</b> | <b>y+</b> | <b>y++</b> |   |   |
|---|----|-----------|------------|-----------|------------|---|---|
| E | 24 | 2248.98   | 1124.99    | 913.55    | 457.28     | 8 | E |
| R | 25 | 2405.08   | 1203.04    | 784.50    | 392.76     | 7 | R |
| P | 26 | 2502.13   | 1251.57    | 628.40    | 314.71     | 6 | P |
| I | 27 | 2615.22   | 1308.11    | 531.35    | 266.18     | 5 | I |
| A | 28 | 2686.25   | 1343.63    | 418.27    | 209.64     | 4 | A |
| L | 29 | 2799.34   | 1400.17    | 347.23    | 174.12     | 3 | L |
| S | 30 | 2886.37   | 1443.69    | 234.14    | 117.58     | 2 | S |
| K | 31 |           |            | 147.11    | 74.06      | 1 | K |



B/Bris NP 448-478 phospho +  
carbamidomethyl

SGGNEVGGDGGG(+79.97)GQISC(+57.02)SPVFAVERPIALSK

Charge: 3, Exp. m/z: 1038.150, Calc. m/z: 1038.151

Data File: D120713\_079, Scans: 11615 - 11615

Max Intensity: 5.26e+04

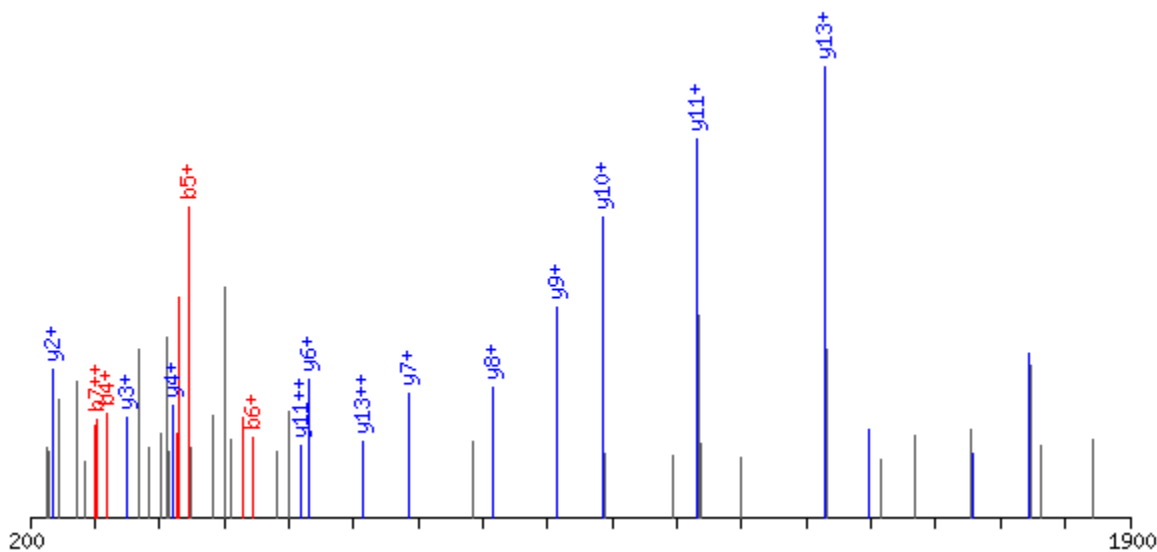

[Hiding fragment losses - Click to Show](#)

|          |    | b+      | b++     | y+      | y++     |    |          |
|----------|----|---------|---------|---------|---------|----|----------|
| S        | 1  | 88.04   | 44.52   |         |         | 31 | S        |
| G        | 2  | 145.06  | 73.03   | 3025.41 | 1513.21 | 30 | G        |
| G        | 3  | 202.08  | 101.54  | 2968.39 | 1484.70 | 29 | G        |
| N        | 4  | 316.13  | 158.57  | 2911.37 | 1456.19 | 28 | N        |
| E        | 5  | 445.17  | 223.09  | 2797.32 | 1399.16 | 27 | E        |
| V        | 6  | 544.24  | 272.62  | 2668.28 | 1334.64 | 26 | V        |
| G        | 7  | 601.26  | 301.13  | 2569.21 | 1285.11 | 25 | G        |
| G        | 8  | 658.28  | 329.64  | 2512.19 | 1256.60 | 24 | G        |
| D        | 9  | 773.31  | 387.16  | 2455.17 | 1228.09 | 23 | D        |
| G        | 10 | 830.33  | 415.67  | 2340.14 | 1170.57 | 22 | G        |
| G        | 11 | 887.35  | 444.18  | 2283.12 | 1142.06 | 21 | G        |
| <u>S</u> | 12 | 1054.35 | 527.68  | 2226.10 | 1113.55 | 20 | <u>S</u> |
| G        | 13 | 1111.37 | 556.19  | 2059.10 | 1030.05 | 19 | G        |
| Q        | 14 | 1239.43 | 620.22  | 2002.08 | 1001.54 | 18 | Q        |
| I        | 15 | 1352.51 | 676.76  | 1874.02 | 937.51  | 17 | I        |
| S        | 16 | 1439.54 | 720.28  | 1760.94 | 880.97  | 16 | S        |
| <u>C</u> | 17 | 1599.57 | 800.29  | 1673.90 | 837.46  | 15 | <u>C</u> |
| S        | 18 | 1686.61 | 843.81  | 1513.87 | 757.44  | 14 | S        |
| P        | 19 | 1783.66 | 892.33  | 1426.84 | 713.92  | 13 | P        |
| V        | 20 | 1882.73 | 941.87  | 1329.79 | 665.40  | 12 | V        |
| F        | 21 | 2029.80 | 1015.40 | 1230.72 | 615.86  | 11 | F        |
| A        | 22 | 2100.83 | 1050.92 | 1083.65 | 542.33  | 10 | A        |
| V        | 23 | 2199.90 | 1100.45 | 1012.61 | 506.81  | 9  | V        |

|   |    | <b>b+</b> | <b>b++</b> | <b>y+</b> | <b>y++</b> |   |   |
|---|----|-----------|------------|-----------|------------|---|---|
| E | 24 | 2328.94   | 1164.98    | 913.55    | 457.28     | 8 | E |
| R | 25 | 2485.04   | 1243.03    | 784.50    | 392.76     | 7 | R |
| P | 26 | 2582.10   | 1291.55    | 628.40    | 314.71     | 6 | P |
| I | 27 | 2695.18   | 1348.09    | 531.35    | 266.18     | 5 | I |
| A | 28 | 2766.22   | 1383.61    | 418.27    | 209.64     | 4 | A |
| L | 29 | 2879.30   | 1440.16    | 347.23    | 174.12     | 3 | L |
| S | 30 | 2966.34   | 1483.67    | 234.14    | 117.58     | 2 | S |
| K | 31 |           |            | 147.11    | 74.06      | 1 | K |

B/Bris NP 484-492 unmodified

### MLSMNIEGR

Charge: 2, Exp. m/z: 525.757, Calc. m/z: 525.762

Data File: D120713\_079, Scans: 10453 - 10453

Max Intensity: 7.47e+05

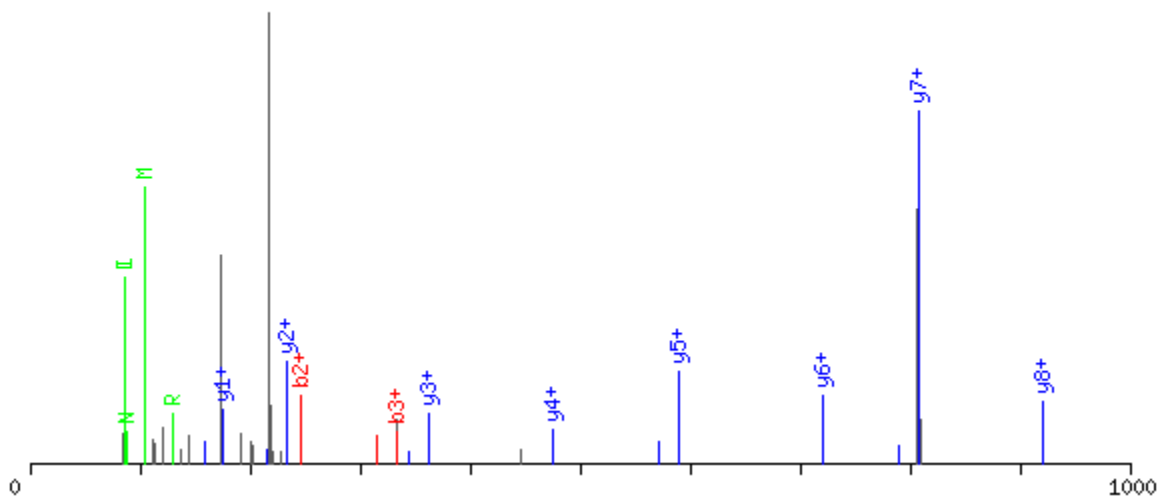

|   |   | b+     | -H2O   | -NH3   | y+     | -H2O   | -NH3   |   |   |
|---|---|--------|--------|--------|--------|--------|--------|---|---|
| M | 1 | 132.05 |        |        |        |        |        | 9 | M |
| L | 2 | 245.13 |        |        | 919.47 | 901.46 | 902.44 | 8 | L |
| S | 3 | 332.16 | 314.15 |        | 806.38 | 788.37 | 789.36 | 7 | S |
| M | 4 | 463.20 | 445.19 |        | 719.35 | 701.34 | 702.32 | 6 | M |
| N | 5 | 577.25 | 559.24 | 560.22 | 588.31 | 570.30 | 571.28 | 5 | N |
| I | 6 | 690.33 | 672.32 | 673.30 | 474.27 | 456.26 | 457.24 | 4 | I |
| E | 7 | 819.37 | 801.36 | 802.35 | 361.18 | 343.17 | 344.16 | 3 | E |
| G | 8 | 876.40 | 858.38 | 859.37 | 232.14 |        | 215.11 | 2 | G |
| R | 9 |        |        |        | 175.12 |        | 158.09 | 1 | R |

B/Bris NP 484-492 phospho

## MLS(+79.97)MNIAGR

Charge: 2, Exp. m/z: 565.740, Calc. m/z: 565.742

Data File: D120713\_002, Scans: 12742 - 12742

Max Intensity: 6.58e+05

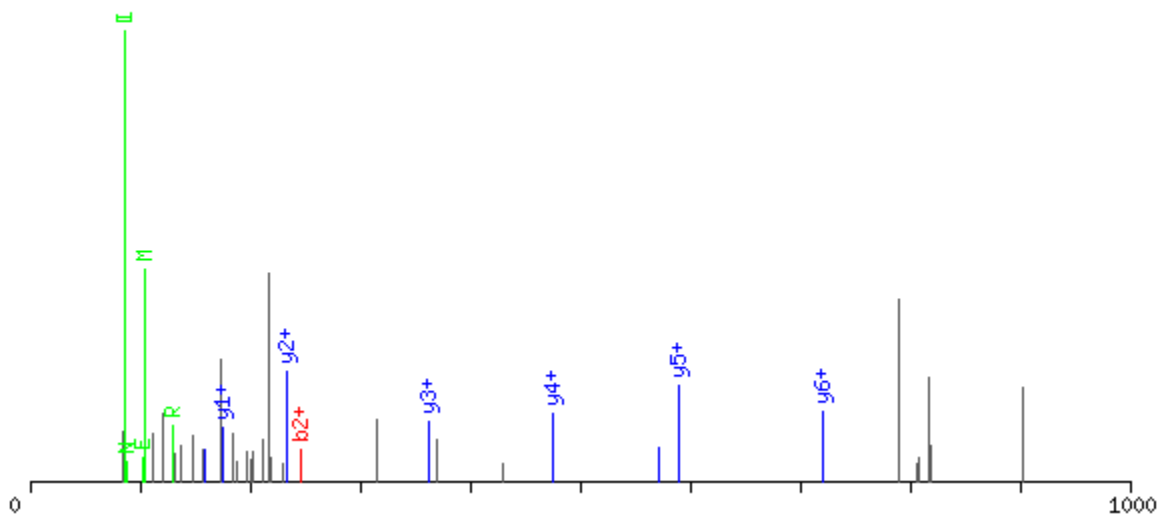

|   |   | b+     | -H2O   | -NH3   | y+     | -H2O   | -NH3   |   |   |
|---|---|--------|--------|--------|--------|--------|--------|---|---|
| M | 1 | 132.05 |        |        |        |        |        | 9 | M |
| L | 2 | 245.13 |        |        | 999.43 | 981.42 | 982.41 | 8 | L |
| S | 3 | 412.13 | 394.12 |        | 886.35 | 868.34 | 869.32 | 7 | S |
| M | 4 | 543.17 | 525.16 |        | 719.35 | 701.34 | 702.32 | 6 | M |
| N | 5 | 657.21 | 639.20 | 640.19 | 588.31 | 570.30 | 571.28 | 5 | N |
| I | 6 | 770.30 | 752.29 | 753.27 | 474.27 | 456.26 | 457.24 | 4 | I |
| E | 7 | 899.34 | 881.33 | 882.31 | 361.18 | 343.17 | 344.16 | 3 | E |
| G | 8 | 956.36 | 938.35 | 939.34 | 232.14 |        | 215.11 | 2 | G |
| R | 9 |        |        |        | 175.12 |        | 158.09 | 1 | R |

B/Bris M1 2-27 unmodified

## SLFGDTIAYLLSLTEDGEGKAELAEK

Charge: 3, Exp. m/z: 924.470, Calc. m/z: 924.141

Data File: edflowthruFBV15, Scans: 33018 - 33018

Max Intensity: 4.42e+04

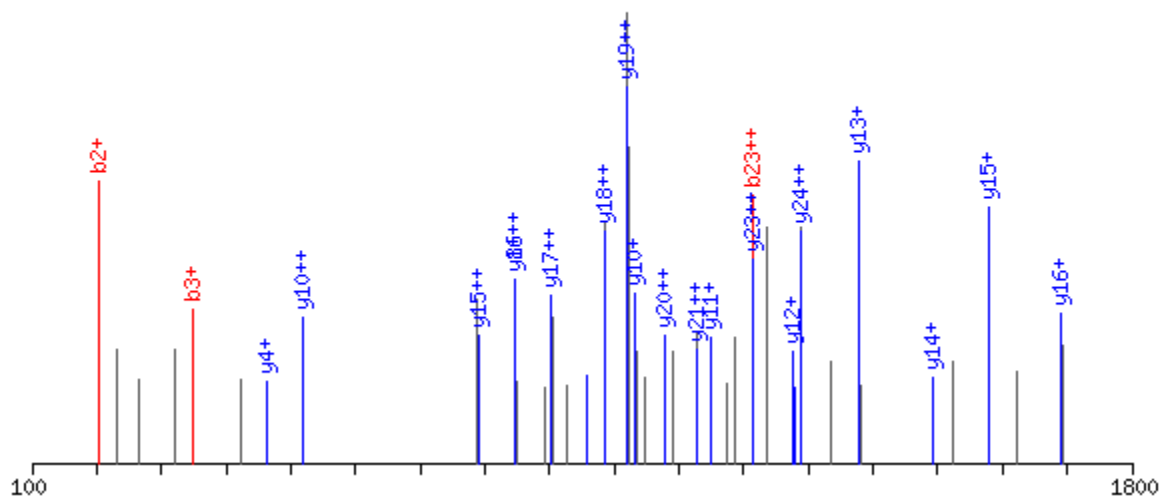[Hiding fragment losses - Click to Show](#)

|   |    | b+      | b++     | y+      | y++     |    |   |
|---|----|---------|---------|---------|---------|----|---|
| S | 1  | 88.04   | 44.52   |         |         | 26 | S |
| L | 2  | 201.12  | 101.07  | 2683.37 | 1342.19 | 25 | L |
| F | 3  | 348.19  | 174.60  | 2570.29 | 1285.65 | 24 | F |
| G | 4  | 405.21  | 203.11  | 2423.22 | 1212.11 | 23 | G |
| D | 5  | 520.24  | 260.62  | 2366.20 | 1183.60 | 22 | D |
| T | 6  | 621.29  | 311.15  | 2251.17 | 1126.09 | 21 | T |
| I | 7  | 734.37  | 367.69  | 2150.12 | 1075.56 | 20 | I |
| A | 8  | 805.41  | 403.21  | 2037.04 | 1019.02 | 19 | A |
| Y | 9  | 968.47  | 484.74  | 1966.00 | 983.50  | 18 | Y |
| L | 10 | 1081.56 | 541.28  | 1802.94 | 901.97  | 17 | L |
| L | 11 | 1194.64 | 597.82  | 1689.85 | 845.43  | 16 | L |
| S | 12 | 1281.67 | 641.34  | 1576.77 | 788.89  | 15 | S |
| L | 13 | 1394.76 | 697.88  | 1489.74 | 745.37  | 14 | L |
| T | 14 | 1495.80 | 748.41  | 1376.65 | 688.83  | 13 | T |
| E | 15 | 1624.85 | 812.93  | 1275.61 | 638.31  | 12 | E |
| D | 16 | 1739.87 | 870.44  | 1146.56 | 573.79  | 11 | D |
| G | 17 | 1796.90 | 898.95  | 1031.54 | 516.27  | 10 | G |
| E | 18 | 1925.94 | 963.47  | 974.52  | 487.76  | 9  | E |
| G | 19 | 1982.96 | 991.98  | 845.47  | 423.24  | 8  | G |
| K | 20 | 2111.05 | 1056.03 | 788.45  | 394.73  | 7  | K |
| A | 21 | 2182.09 | 1091.55 | 660.36  | 330.68  | 6  | A |
| E | 22 | 2311.13 | 1156.07 | 589.32  | 295.16  | 5  | E |
| L | 23 | 2424.22 | 1212.61 | 460.28  | 230.64  | 4  | L |

|   |    | <b>b+</b> | <b>b++</b> | <b>y+</b> | <b>y++</b> |   |   |
|---|----|-----------|------------|-----------|------------|---|---|
| A | 24 | 2495.26   | 1248.13    | 347.19    | 174.10     | 3 | A |
| E | 25 | 2624.30   | 1312.65    | 276.16    | 138.58     | 2 | E |
| K | 26 |           |            | 147.11    | 74.06      | 1 | K |

B/Bris M1 2-27 phospho

S(+79.97)LFGDTIAYLLSLTEDGEGKAELAEK

Charge: 4, Exp. m/z: 713.850, Calc. m/z: 713.347

Data File: D120713\_081, Scans: 30399 - 30399

Max Intensity: 1.95e+05

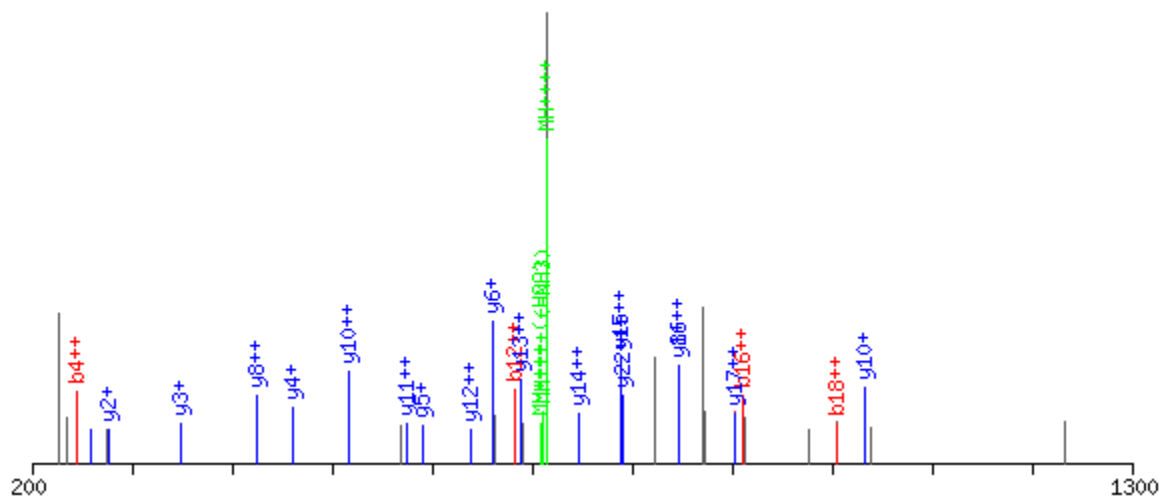[Hiding fragment losses - Click to Show](#)

|   |    | b+      | b++     | b+++   | y+      | y++     | y+++   |    |   |
|---|----|---------|---------|--------|---------|---------|--------|----|---|
| S | 1  | 168.01  | 84.51   | 56.67  |         |         |        | 26 | S |
| L | 2  | 281.09  | 141.05  | 94.37  | 2683.37 | 1342.19 | 895.13 | 25 | L |
| F | 3  | 428.16  | 214.58  | 143.39 | 2570.29 | 1285.65 | 857.43 | 24 | F |
| G | 4  | 485.18  | 243.09  | 162.40 | 2423.22 | 1212.11 | 808.41 | 23 | G |
| D | 5  | 600.21  | 300.61  | 200.74 | 2366.20 | 1183.60 | 789.40 | 22 | D |
| T | 6  | 701.25  | 351.13  | 234.42 | 2251.17 | 1126.09 | 751.06 | 21 | T |
| I | 7  | 814.34  | 407.67  | 272.12 | 2150.12 | 1075.56 | 717.38 | 20 | I |
| A | 8  | 885.38  | 443.19  | 295.80 | 2037.04 | 1019.02 | 679.68 | 19 | A |
| Y | 9  | 1048.44 | 524.72  | 350.15 | 1966.00 | 983.50  | 656.01 | 18 | Y |
| L | 10 | 1161.52 | 581.27  | 387.85 | 1802.94 | 901.97  | 601.65 | 17 | L |
| L | 11 | 1274.61 | 637.81  | 425.54 | 1689.85 | 845.43  | 563.96 | 16 | L |
| S | 12 | 1361.64 | 681.32  | 454.55 | 1576.77 | 788.89  | 526.26 | 15 | S |
| L | 13 | 1474.72 | 737.87  | 492.25 | 1489.74 | 745.37  | 497.25 | 14 | L |
| T | 14 | 1575.77 | 788.39  | 525.93 | 1376.65 | 688.83  | 459.56 | 13 | T |
| E | 15 | 1704.81 | 852.91  | 568.94 | 1275.61 | 638.31  | 425.87 | 12 | E |
| D | 16 | 1819.84 | 910.42  | 607.28 | 1146.56 | 573.79  | 382.86 | 11 | D |
| G | 17 | 1876.86 | 938.93  | 626.29 | 1031.54 | 516.27  | 344.52 | 10 | G |
| E | 18 | 2005.90 | 1003.46 | 669.31 | 974.52  | 487.76  | 325.51 | 9  | E |
| G | 19 | 2062.93 | 1031.97 | 688.31 | 845.47  | 423.24  | 282.50 | 8  | G |
| K | 20 | 2191.02 | 1096.01 | 731.01 | 788.45  | 394.73  | 263.49 | 7  | K |
| A | 21 | 2262.06 | 1131.53 | 754.69 | 660.36  | 330.68  | 220.79 | 6  | A |
| E | 22 | 2391.10 | 1196.05 | 797.70 | 589.32  | 295.16  | 197.11 | 5  | E |
| L | 23 | 2504.18 | 1252.60 | 835.40 | 460.28  | 230.64  | 154.10 | 4  | L |

|   |    | <b>b+</b> | <b>b++</b> | <b>b+++</b> | <b>y+</b>              | <b>y++</b> | <b>y+++</b> |   |   |
|---|----|-----------|------------|-------------|------------------------|------------|-------------|---|---|
| A | 24 | 2575.22   | 1288.11    | 859.08      | <a href="#">347.19</a> | 174.10     | 116.40      | 3 | A |
| E | 25 | 2704.26   | 1352.64    | 902.09      | <a href="#">276.16</a> | 138.58     | 92.72       | 2 | E |
| K | 26 |           |            |             | 147.11                 | 74.06      | 49.71       | 1 | K |



B/Bris M1 2-27 Met loss

## SLFGDTIAYLLSLTEDGEGKAELA EK

Charge: 3, Exp. m/z: 924.137, Calc. m/z: 924.141

Data File: B120210\_017, Scans: 6875 - 6875

Max Intensity: 8.70e+01

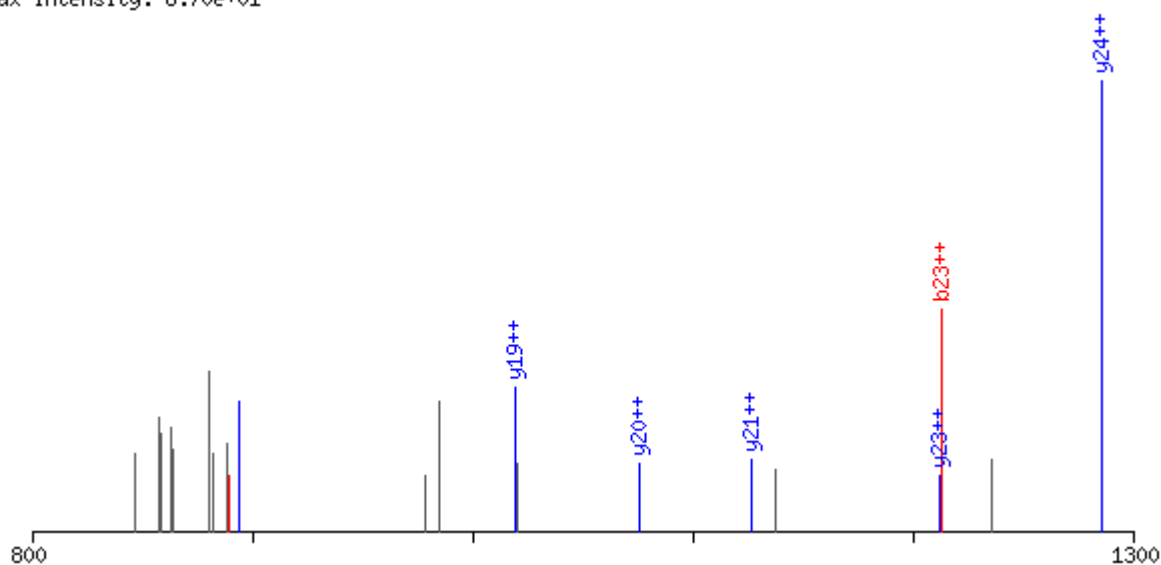[Hiding fragment losses - Click to Show](#)

|   |    | b+      | b++     | y+      | y++     |    |   |
|---|----|---------|---------|---------|---------|----|---|
| S | 1  | 88.04   | 44.52   |         |         | 26 | S |
| L | 2  | 201.12  | 101.07  | 2683.37 | 1342.19 | 25 | L |
| F | 3  | 348.19  | 174.60  | 2570.29 | 1285.65 | 24 | F |
| G | 4  | 405.21  | 203.11  | 2423.22 | 1212.11 | 23 | G |
| D | 5  | 520.24  | 260.62  | 2366.20 | 1183.60 | 22 | D |
| T | 6  | 621.29  | 311.15  | 2251.17 | 1126.09 | 21 | T |
| I | 7  | 734.37  | 367.69  | 2150.12 | 1075.56 | 20 | I |
| A | 8  | 805.41  | 403.21  | 2037.04 | 1019.02 | 19 | A |
| Y | 9  | 968.47  | 484.74  | 1966.00 | 983.50  | 18 | Y |
| L | 10 | 1081.56 | 541.28  | 1802.94 | 901.97  | 17 | L |
| L | 11 | 1194.64 | 597.82  | 1689.85 | 845.43  | 16 | L |
| S | 12 | 1281.67 | 641.34  | 1576.77 | 788.89  | 15 | S |
| L | 13 | 1394.76 | 697.88  | 1489.74 | 745.37  | 14 | L |
| T | 14 | 1495.80 | 748.41  | 1376.65 | 688.83  | 13 | T |
| E | 15 | 1624.85 | 812.93  | 1275.61 | 638.31  | 12 | E |
| D | 16 | 1739.87 | 870.44  | 1146.56 | 573.79  | 11 | D |
| G | 17 | 1796.90 | 898.95  | 1031.54 | 516.27  | 10 | G |
| E | 18 | 1925.94 | 963.47  | 974.52  | 487.76  | 9  | E |
| G | 19 | 1982.96 | 991.98  | 845.47  | 423.24  | 8  | G |
| K | 20 | 2111.05 | 1056.03 | 788.45  | 394.73  | 7  | K |
| A | 21 | 2182.09 | 1091.55 | 660.36  | 330.68  | 6  | A |
| E | 22 | 2311.13 | 1156.07 | 589.32  | 295.16  | 5  | E |
| L | 23 | 2424.22 | 1212.61 | 460.28  | 230.64  | 4  | L |
| A | 24 | 2495.26 | 1248.13 | 347.19  | 174.10  | 3  | A |
| E | 25 | 2624.30 | 1312.65 | 276.16  | 138.58  | 2  | E |
| K | 26 |         |         | 147.11  | 74.06   | 1  | K |

## B/Bris M1 2-27 Met loss and phospho

SLFGDT(+79.97)IAYLLSLTEDGEGKAELAEK

Charge: 4, Exp. m/z: 713.345, Calc. m/z: 713.347

Data File: B120210\_017, Scans: 7140 - 7140

Max Intensity: 1.77e+03

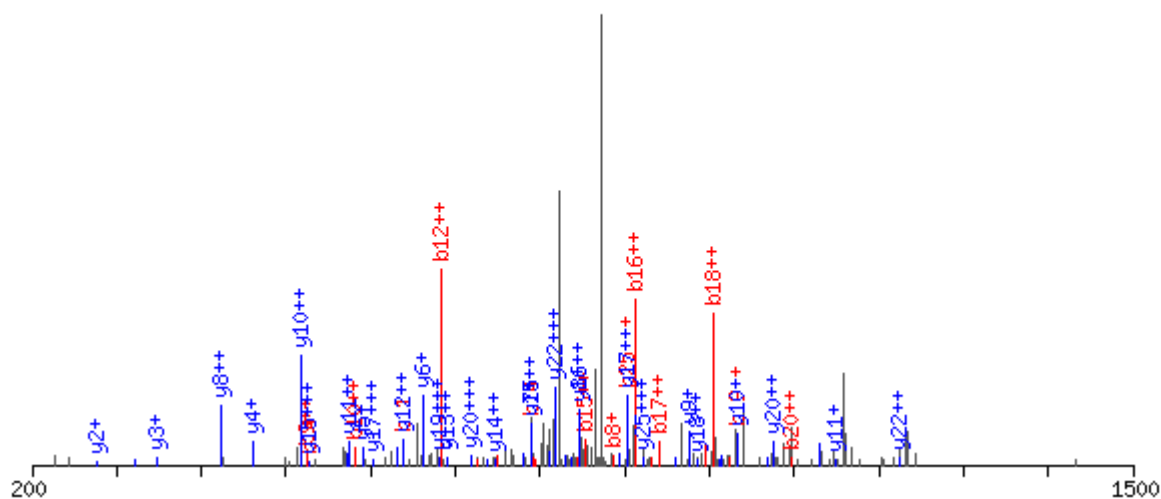[Hiding fragment losses - Click to Show](#)

|   |    | b+      | b++     | b+++   | y+      | y++     | y+++   |    |   |
|---|----|---------|---------|--------|---------|---------|--------|----|---|
| S | 1  | 88.04   | 44.52   | 30.02  |         |         |        | 26 | S |
| L | 2  | 201.12  | 101.07  | 67.71  | 2763.34 | 1382.17 | 921.78 | 25 | L |
| F | 3  | 348.19  | 174.60  | 116.74 | 2650.25 | 1325.63 | 884.09 | 24 | F |
| G | 4  | 405.21  | 203.11  | 135.74 | 2503.19 | 1252.10 | 835.07 | 23 | G |
| D | 5  | 520.24  | 260.62  | 174.08 | 2446.16 | 1223.59 | 816.06 | 22 | D |
| I | 6  | 701.25  | 351.13  | 234.42 | 2331.14 | 1166.07 | 777.72 | 21 | I |
| I | 7  | 814.34  | 407.67  | 272.12 | 2150.12 | 1075.56 | 717.38 | 20 | I |
| A | 8  | 885.38  | 443.19  | 295.80 | 2037.04 | 1019.02 | 679.68 | 19 | A |
| Y | 9  | 1048.44 | 524.72  | 350.15 | 1966.00 | 983.50  | 656.01 | 18 | Y |
| L | 10 | 1161.52 | 581.27  | 387.85 | 1802.94 | 901.97  | 601.65 | 17 | L |
| L | 11 | 1274.61 | 637.81  | 425.54 | 1689.85 | 845.43  | 563.96 | 16 | L |
| S | 12 | 1361.64 | 681.32  | 454.55 | 1576.77 | 788.89  | 526.26 | 15 | S |
| L | 13 | 1474.72 | 737.87  | 492.25 | 1489.74 | 745.37  | 497.25 | 14 | L |
| T | 14 | 1575.77 | 788.39  | 525.93 | 1376.65 | 688.83  | 459.56 | 13 | T |
| E | 15 | 1704.81 | 852.91  | 568.94 | 1275.61 | 638.31  | 425.87 | 12 | E |
| D | 16 | 1819.84 | 910.42  | 607.28 | 1146.56 | 573.79  | 382.86 | 11 | D |
| G | 17 | 1876.86 | 938.93  | 626.29 | 1031.54 | 516.27  | 344.52 | 10 | G |
| E | 18 | 2005.90 | 1003.46 | 669.31 | 974.52  | 487.76  | 325.51 | 9  | E |
| G | 19 | 2062.93 | 1031.97 | 688.31 | 845.47  | 423.24  | 282.50 | 8  | G |
| K | 20 | 2191.02 | 1096.01 | 731.01 | 788.45  | 394.73  | 263.49 | 7  | K |
| A | 21 | 2262.06 | 1131.53 | 754.69 | 660.36  | 330.68  | 220.79 | 6  | A |
| E | 22 | 2391.10 | 1196.05 | 797.70 | 589.32  | 295.16  | 197.11 | 5  | E |
| L | 23 | 2504.18 | 1252.60 | 835.40 | 460.28  | 230.64  | 154.10 | 4  | L |
| A | 24 | 2575.22 | 1288.11 | 859.08 | 347.19  | 174.10  | 116.40 | 3  | A |
| E | 25 | 2704.26 | 1352.64 | 902.09 | 276.16  | 138.58  | 92.72  | 2  | E |
| K | 26 |         |         |        | 147.11  | 74.06   | 49.71  | 1  | K |

B/Bris M1 36-47 unmodified

## EFDLDSALEWIK

Charge: 2, Exp. m/z: 733.360, Calc. m/z: 733.367

Data File: D120713\_081, Scans: 29106 - 29106

Max Intensity: 1.11e+04

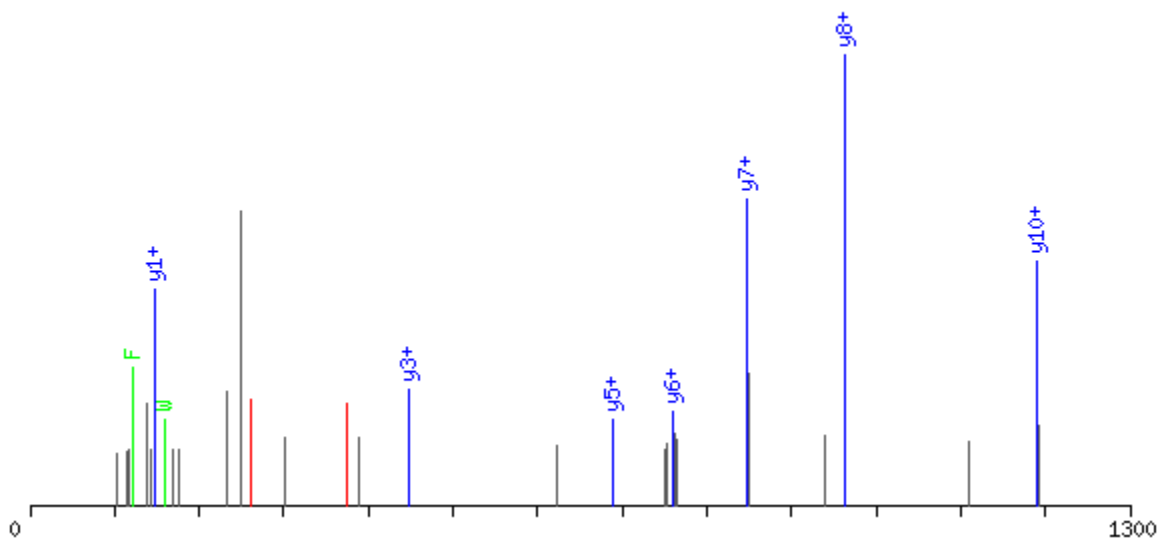

|   |    | b+      | -H2O    | y+      | -H2O    | -NH3    |    |   |
|---|----|---------|---------|---------|---------|---------|----|---|
| E | 1  | 130.05  | 112.04  |         |         |         | 12 | E |
| F | 2  | 277.12  | 259.11  | 1336.68 | 1318.67 | 1319.65 | 11 | F |
| D | 3  | 392.15  | 374.13  | 1189.61 | 1171.60 | 1172.58 | 10 | D |
| L | 4  | 505.23  | 487.22  | 1074.58 | 1056.57 | 1057.56 | 9  | L |
| D | 5  | 620.26  | 602.25  | 961.50  | 943.49  | 944.47  | 8  | D |
| S | 6  | 707.29  | 689.28  | 846.47  | 828.46  | 829.45  | 7  | S |
| A | 7  | 778.33  | 760.31  | 759.44  | 741.43  | 742.41  | 6  | A |
| L | 8  | 891.41  | 873.40  | 688.40  | 670.39  | 671.38  | 5  | L |
| E | 9  | 1020.45 | 1002.44 | 575.32  | 557.31  | 558.29  | 4  | E |
| W | 10 | 1206.53 | 1188.52 | 446.28  |         | 429.25  | 3  | W |
| I | 11 | 1319.62 | 1301.60 | 260.20  |         | 243.17  | 2  | I |
| K | 12 |         |         | 147.11  |         | 130.09  | 1  | K |

B/Bris M1 36-47 phospho

## EFDLDS(+79.97)ALEWIK

Charge: 2, Exp. m/z: 773.850, Calc. m/z: 773.352

Data File: D120713\_002, Scans: 16293 - 16293

Max Intensity: 6.02e+04

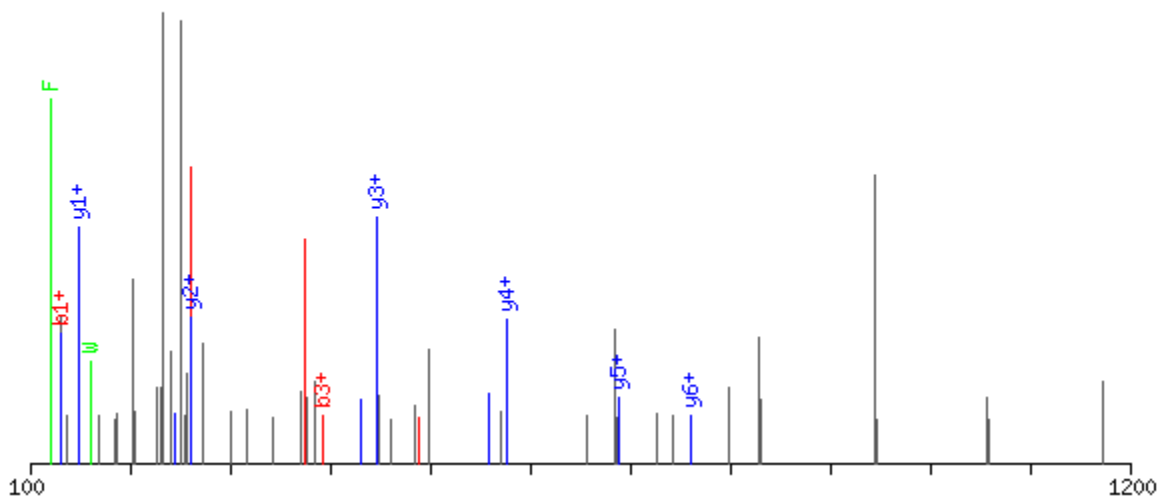

|   |    | b+      | -H2O    | y+      | -H2O    | -NH3    |    |   |
|---|----|---------|---------|---------|---------|---------|----|---|
| E | 1  | 130.05  | 112.04  |         |         |         | 12 | E |
| F | 2  | 277.12  | 259.11  | 1416.64 | 1398.63 | 1399.62 | 11 | F |
| D | 3  | 392.15  | 374.13  | 1269.58 | 1251.57 | 1252.55 | 10 | D |
| L | 4  | 505.23  | 487.22  | 1154.55 | 1136.54 | 1137.52 | 9  | L |
| D | 5  | 620.26  | 602.25  | 1041.47 | 1023.45 | 1024.44 | 8  | D |
| S | 6  | 787.25  | 769.24  | 926.44  | 908.43  | 909.41  | 7  | S |
| A | 7  | 858.29  | 840.28  | 759.44  | 741.43  | 742.41  | 6  | A |
| L | 8  | 971.38  | 953.37  | 688.40  | 670.39  | 671.38  | 5  | L |
| E | 9  | 1100.42 | 1082.41 | 575.32  | 557.31  | 558.29  | 4  | E |
| W | 10 | 1286.50 | 1268.49 | 446.28  |         | 429.25  | 3  | W |
| I | 11 | 1399.58 | 1381.57 | 260.20  |         | 243.17  | 2  | I |
| K | 12 |         |         | 147.11  |         | 130.09  | 1  | K |

B/Bris M1 78-92 unmodified

## FITEPLSGMGTTATK

Charge: 2, Exp. m/z: 777.396, Calc. m/z: 777.402

Data File: D120713\_079, Scans: 11005 - 11005

Max Intensity: 9.32e+05

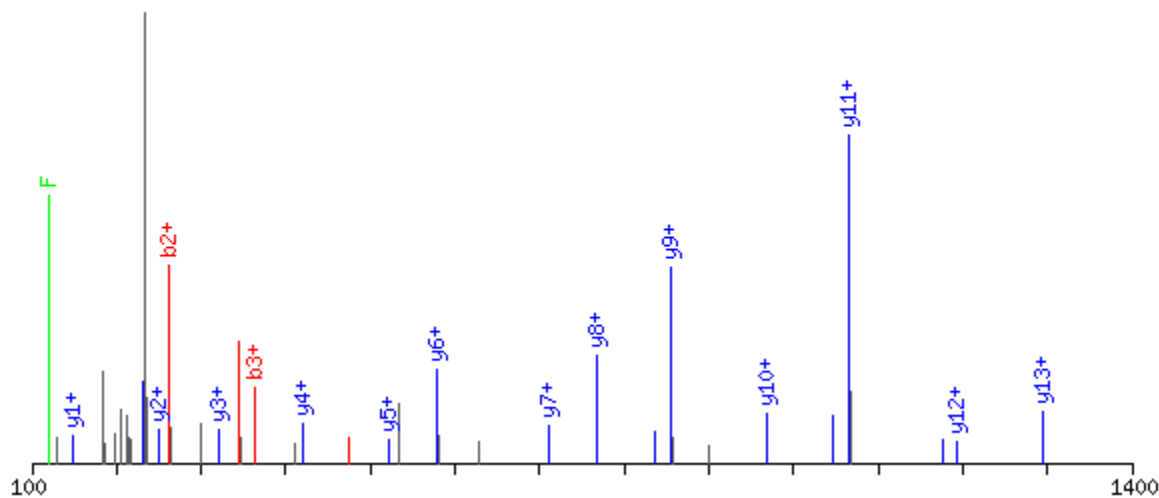

|   |    | b+      | -H2O    | y+      | -H2O    | -NH3    |    |   |
|---|----|---------|---------|---------|---------|---------|----|---|
| F | 1  | 148.08  |         |         |         |         | 15 | F |
| I | 2  | 261.16  |         | 1406.72 | 1388.71 | 1389.69 | 14 | I |
| T | 3  | 362.21  | 344.20  | 1293.64 | 1275.62 | 1276.61 | 13 | T |
| E | 4  | 491.25  | 473.24  | 1192.59 | 1174.58 | 1175.56 | 12 | E |
| P | 5  | 588.30  | 570.29  | 1063.55 | 1045.53 | 1046.52 | 11 | P |
| L | 6  | 701.39  | 683.38  | 966.49  | 948.48  | 949.47  | 10 | L |
| S | 7  | 788.42  | 770.41  | 853.41  | 835.40  | 836.38  | 9  | S |
| G | 8  | 845.44  | 827.43  | 766.38  | 748.37  | 749.35  | 8  | G |
| M | 9  | 976.48  | 958.47  | 709.35  | 691.34  | 692.33  | 7  | M |
| G | 10 | 1033.50 | 1015.49 | 578.31  | 560.30  | 561.29  | 6  | G |
| T | 11 | 1134.55 | 1116.54 | 521.29  | 503.28  | 504.27  | 5  | T |
| T | 12 | 1235.60 | 1217.59 | 420.25  | 402.23  | 403.22  | 4  | T |
| A | 13 | 1306.63 | 1288.62 | 319.20  | 301.19  | 302.17  | 3  | A |
| T | 14 | 1407.68 | 1389.67 | 248.16  | 230.15  | 231.13  | 2  | T |
| K | 15 |         |         | 147.11  |         | 130.09  | 1  | K |

B/Bris M1 78-92 phospho

## FITEPLSGMGT(+79.97)TATK

Charge: 2, Exp. m/z: 817.380, Calc. m/z: 817.382

Data File: D120713\_079, Scans: 11424 - 11424

Max Intensity: 1.65e+05

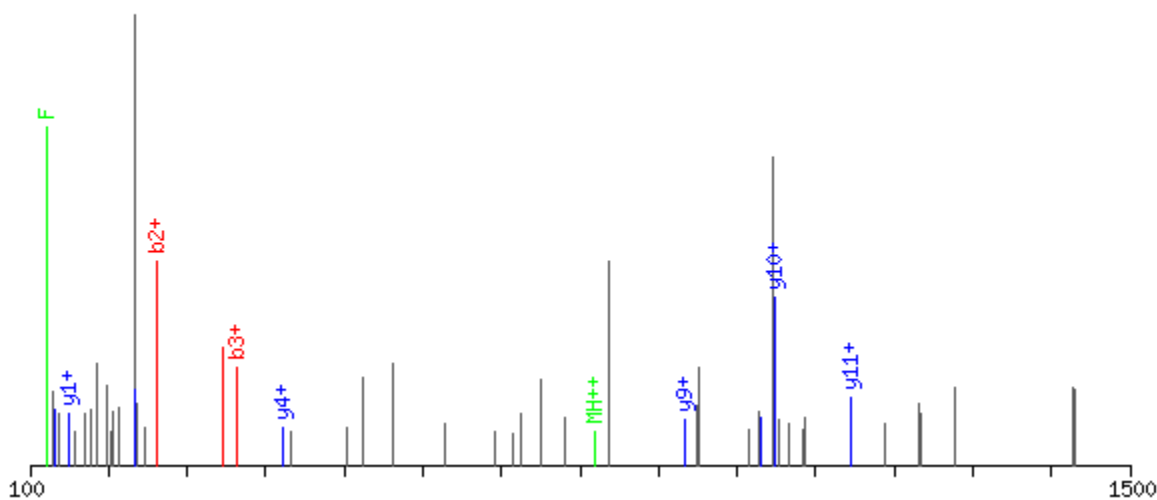

|   |    | b+      | -H2O    | y+      | -H2O    | -NH3    |    |   |
|---|----|---------|---------|---------|---------|---------|----|---|
| F | 1  | 148.08  |         |         |         |         | 15 | F |
| I | 2  | 261.16  |         | 1486.69 | 1468.68 | 1469.66 | 14 | I |
| T | 3  | 362.21  | 344.20  | 1373.60 | 1355.59 | 1356.58 | 13 | T |
| E | 4  | 491.25  | 473.24  | 1272.55 | 1254.54 | 1255.53 | 12 | E |
| P | 5  | 588.30  | 570.29  | 1143.51 | 1125.50 | 1126.48 | 11 | P |
| L | 6  | 701.39  | 683.38  | 1046.46 | 1028.45 | 1029.43 | 10 | L |
| S | 7  | 788.42  | 770.41  | 933.37  | 915.36  | 916.35  | 9  | S |
| G | 8  | 845.44  | 827.43  | 846.34  | 828.33  | 829.32  | 8  | G |
| M | 9  | 976.48  | 958.47  | 789.32  | 771.31  | 772.29  | 7  | M |
| G | 10 | 1033.50 | 1015.49 | 658.28  | 640.27  | 641.25  | 6  | G |
| I | 11 | 1214.52 | 1196.51 | 601.26  | 583.25  | 584.23  | 5  | I |
| T | 12 | 1315.56 | 1297.55 | 420.25  | 402.23  | 403.22  | 4  | T |
| A | 13 | 1386.60 | 1368.59 | 319.20  | 301.19  | 302.17  | 3  | A |
| T | 14 | 1487.65 | 1469.64 | 248.16  | 230.15  | 231.13  | 2  | T |
| K | 15 |         |         | 147.11  |         | 130.09  | 1  | K |

B/Bris M1 188-213 unmodified

## TMNGMGKGEDVQKLAEEELQSNIGVLR

Charge: 3, Exp. m/z: 940.150, Calc. m/z: 939.814

Data File: D120713\_002, Scans: 14525 - 14525

Max Intensity: 1.23e+05

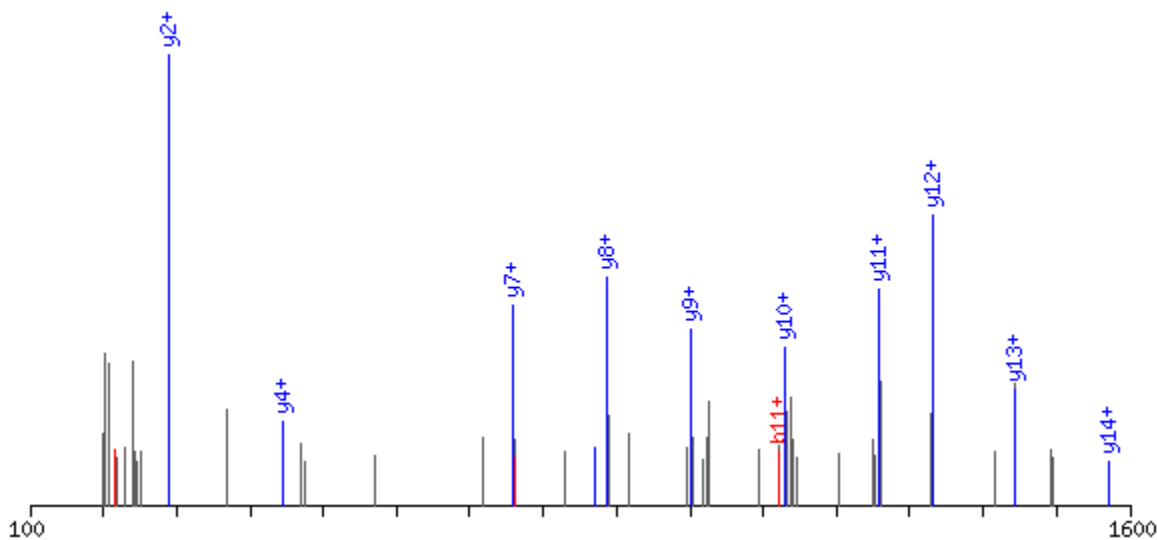[Hiding fragment losses - Click to Show](#)

|   |    | b+      | b++     | y+      | y++     |    |   |
|---|----|---------|---------|---------|---------|----|---|
| T | 1  | 102.05  | 51.53   |         |         | 26 | T |
| M | 2  | 233.10  | 117.05  | 2716.38 | 1358.69 | 25 | M |
| N | 3  | 347.14  | 174.07  | 2585.34 | 1293.17 | 24 | N |
| G | 4  | 404.16  | 202.58  | 2471.29 | 1236.15 | 23 | G |
| M | 5  | 535.20  | 268.10  | 2414.27 | 1207.64 | 22 | M |
| G | 6  | 592.22  | 296.61  | 2283.23 | 1142.12 | 21 | G |
| K | 7  | 720.32  | 360.66  | 2226.21 | 1113.61 | 20 | K |
| G | 8  | 777.34  | 389.17  | 2098.11 | 1049.56 | 19 | G |
| E | 9  | 906.38  | 453.69  | 2041.09 | 1021.05 | 18 | E |
| D | 10 | 1021.41 | 511.21  | 1912.05 | 956.53  | 17 | D |
| V | 11 | 1120.48 | 560.74  | 1797.02 | 899.02  | 16 | V |
| Q | 12 | 1248.53 | 624.77  | 1697.95 | 849.48  | 15 | Q |
| K | 13 | 1376.63 | 688.82  | 1569.90 | 785.45  | 14 | K |
| L | 14 | 1489.71 | 745.36  | 1441.80 | 721.40  | 13 | L |
| A | 15 | 1560.75 | 780.88  | 1328.72 | 664.86  | 12 | A |
| E | 16 | 1689.79 | 845.40  | 1257.68 | 629.34  | 11 | E |
| E | 17 | 1818.84 | 909.92  | 1128.64 | 564.82  | 10 | E |
| L | 18 | 1931.92 | 966.46  | 999.59  | 500.30  | 9  | L |
| Q | 19 | 2059.98 | 1030.49 | 886.51  | 443.76  | 8  | Q |
| S | 20 | 2147.01 | 1074.01 | 758.45  | 379.73  | 7  | S |
| N | 21 | 2261.05 | 1131.03 | 671.42  | 336.21  | 6  | N |
| I | 22 | 2374.14 | 1187.57 | 557.38  | 279.19  | 5  | I |
| G | 23 | 2431.16 | 1216.08 | 444.29  | 222.65  | 4  | G |

|   |    | <b>b+</b> | <b>b++</b> | <b>y+</b>              | <b>y++</b> |   |   |
|---|----|-----------|------------|------------------------|------------|---|---|
| V | 24 | 2530.23   | 1265.62    | 387.27                 | 194.14     | 3 | V |
| L | 25 | 2643.31   | 1322.16    | <a href="#">288.20</a> | 144.61     | 2 | L |
| R | 26 |           |            | 175.12                 | 88.06      | 1 | R |



B/Bris M1 188-213 phospho

T(+79.97)MNGMGK(+114.04)GEDVQKLAEELOSNIGVLR

Charge: 3, Exp. m/z: 1005.160, Calc. m/z: 1004.481

Data File: D120713\_003, Scans: 14505 - 14505

Max Intensity: 1.73e+05

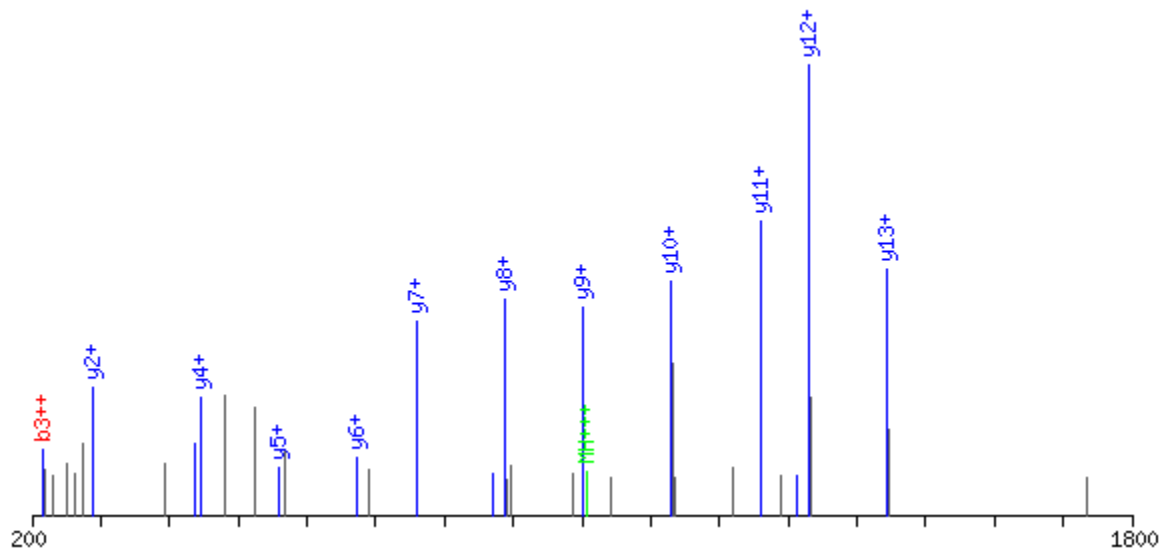[Hiding fragment losses - Click to Show](#)

|   |    | b+      | b++     | y+      | y++     |    |   |
|---|----|---------|---------|---------|---------|----|---|
| I | 1  | 182.02  | 91.51   |         |         | 26 | I |
| M | 2  | 313.06  | 157.03  | 2830.42 | 1415.71 | 25 | M |
| N | 3  | 427.10  | 214.06  | 2699.38 | 1350.19 | 24 | N |
| G | 4  | 484.13  | 242.57  | 2585.34 | 1293.17 | 23 | G |
| M | 5  | 615.17  | 308.09  | 2528.31 | 1264.66 | 22 | M |
| G | 6  | 672.19  | 336.60  | 2397.27 | 1199.14 | 21 | G |
| K | 7  | 914.33  | 457.67  | 2340.25 | 1170.63 | 20 | K |
| G | 8  | 971.35  | 486.18  | 2098.11 | 1049.56 | 19 | G |
| E | 9  | 1100.39 | 550.70  | 2041.09 | 1021.05 | 18 | E |
| D | 10 | 1215.42 | 608.21  | 1912.05 | 956.53  | 17 | D |
| V | 11 | 1314.49 | 657.75  | 1797.02 | 899.02  | 16 | V |
| Q | 12 | 1442.54 | 721.78  | 1697.95 | 849.48  | 15 | Q |
| K | 13 | 1570.64 | 785.82  | 1569.90 | 785.45  | 14 | K |
| L | 14 | 1683.72 | 842.37  | 1441.80 | 721.40  | 13 | L |
| A | 15 | 1754.76 | 877.88  | 1328.72 | 664.86  | 12 | A |
| E | 16 | 1883.80 | 942.41  | 1257.68 | 629.34  | 11 | E |
| E | 17 | 2012.85 | 1006.93 | 1128.64 | 564.82  | 10 | E |
| L | 18 | 2125.93 | 1063.47 | 999.59  | 500.30  | 9  | L |
| Q | 19 | 2253.99 | 1127.50 | 886.51  | 443.76  | 8  | Q |
| S | 20 | 2341.02 | 1171.01 | 758.45  | 379.73  | 7  | S |
| N | 21 | 2455.06 | 1228.04 | 671.42  | 336.21  | 6  | N |
| I | 22 | 2568.15 | 1284.58 | 557.38  | 279.19  | 5  | I |
| G | 23 | 2625.17 | 1313.09 | 444.29  | 222.65  | 4  | G |

|   |    | <b>b+</b> | <b>b++</b> | <b>y+</b>              | <b>y++</b> |   |   |
|---|----|-----------|------------|------------------------|------------|---|---|
| V | 24 | 2724.24   | 1362.62    | 387.27                 | 194.14     | 3 | V |
| L | 25 | 2837.32   | 1419.16    | <a href="#">288.20</a> | 144.61     | 2 | L |
| R | 26 |           |            | 175.12                 | 88.06      | 1 | R |

B/Bris M1 214-227 unmodified

## SLGASQKNGEGIAK

Charge: 2, Exp. m/z: 680.365, Calc. m/z: 680.367

Data File: D120713\_003, Scans: 7524 - 7524

Max Intensity: 1.83e+05

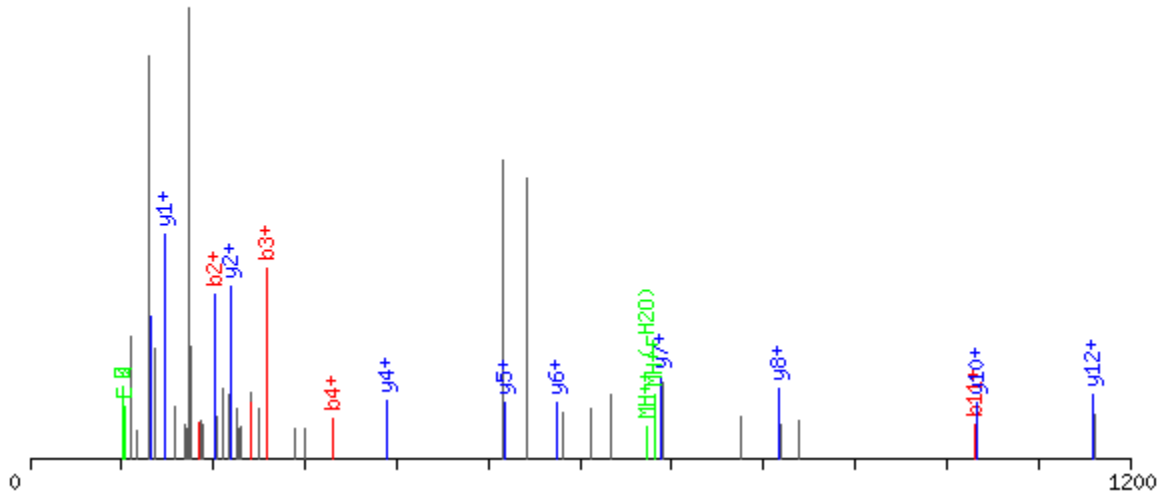

|   |    | b+      | -H2O    | -NH3    | y+      | -H2O    | -NH3    |    |   |
|---|----|---------|---------|---------|---------|---------|---------|----|---|
| S | 1  | 88.04   | 70.03   |         |         |         |         | 14 | S |
| L | 2  | 201.12  | 183.11  |         | 1272.69 | 1254.68 | 1255.66 | 13 | L |
| G | 3  | 258.14  | 240.13  |         | 1159.61 | 1141.60 | 1142.58 | 12 | G |
| A | 4  | 329.18  | 311.17  |         | 1102.59 | 1084.57 | 1085.56 | 11 | A |
| S | 5  | 416.21  | 398.20  |         | 1031.55 | 1013.54 | 1014.52 | 10 | S |
| Q | 6  | 544.27  | 526.26  |         | 944.52  | 926.51  | 927.49  | 9  | Q |
| K | 7  | 672.37  | 654.36  | 655.34  | 816.46  | 798.45  | 799.43  | 8  | K |
| N | 8  | 786.41  | 768.40  | 769.38  | 688.36  | 670.35  | 671.34  | 7  | N |
| G | 9  | 843.43  | 825.42  | 826.41  | 574.32  | 556.31  | 557.29  | 6  | G |
| E | 10 | 972.47  | 954.46  | 955.45  | 517.30  | 499.29  | 500.27  | 5  | E |
| G | 11 | 1029.50 | 1011.49 | 1012.47 | 388.26  |         | 371.23  | 4  | G |
| I | 12 | 1142.58 | 1124.57 | 1125.55 | 331.23  |         | 314.21  | 3  | I |
| A | 13 | 1213.62 | 1195.61 | 1196.59 | 218.15  |         | 201.12  | 2  | A |
| K | 14 |         |         |         | 147.11  |         | 130.09  | 1  | K |

B/Bris M1 214-227 phospho +  
deamidated

### SLGAS(+79.97)QKN(+0.98)GEGIAK

Charge: 2, Exp. m/z: 720.840, Calc. m/z: 720.842

Data File: D120713\_003, Scans: 8468 - 8468

Max Intensity: 4.73e+05

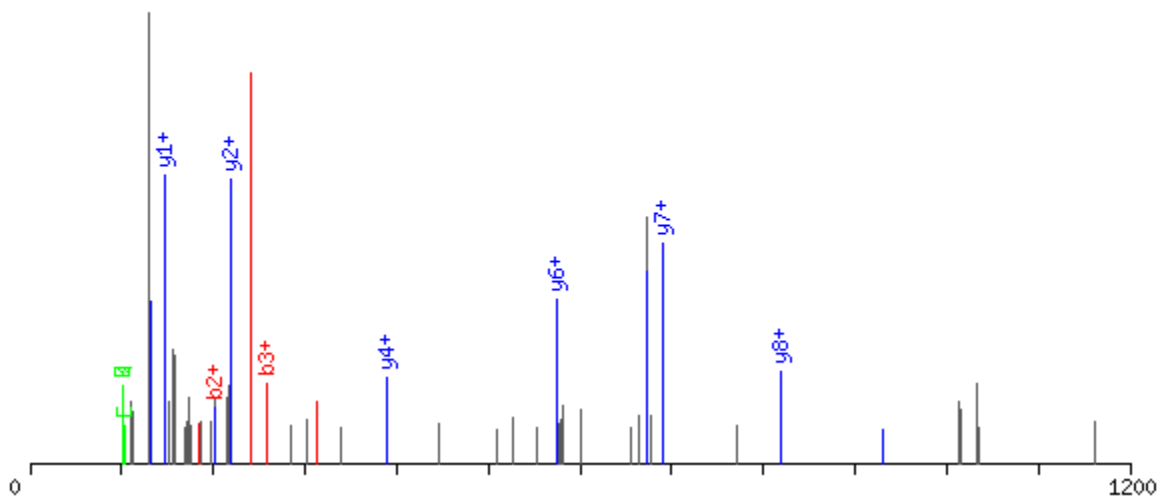

|          |    | b+      | -H2O    | -NH3    | y+      | -H2O    | -NH3    |    |          |
|----------|----|---------|---------|---------|---------|---------|---------|----|----------|
| S        | 1  | 88.04   | 70.03   |         |         |         |         | 14 | S        |
| L        | 2  | 201.12  | 183.11  |         | 1353.64 | 1335.63 | 1336.61 | 13 | L        |
| G        | 3  | 258.14  | 240.13  |         | 1240.56 | 1222.55 | 1223.53 | 12 | G        |
| A        | 4  | 329.18  | 311.17  |         | 1183.54 | 1165.52 | 1166.51 | 11 | A        |
| <u>S</u> | 5  | 496.18  | 478.17  |         | 1112.50 | 1094.49 | 1095.47 | 10 | <u>S</u> |
| Q        | 6  | 624.24  | 606.23  |         | 945.50  | 927.49  | 928.47  | 9  | Q        |
| K        | 7  | 752.33  | 734.32  | 735.31  | 817.44  | 799.43  | 800.41  | 8  | K        |
| <u>N</u> | 8  | 867.36  | 849.35  | 850.33  | 689.35  | 671.34  | 672.32  | 7  | <u>N</u> |
| G        | 9  | 924.38  | 906.37  | 907.36  | 574.32  | 556.31  | 557.29  | 6  | G        |
| E        | 10 | 1053.42 | 1035.41 | 1036.40 | 517.30  | 499.29  | 500.27  | 5  | E        |
| G        | 11 | 1110.45 | 1092.44 | 1093.42 | 388.26  |         | 371.23  | 4  | G        |
| I        | 12 | 1223.53 | 1205.52 | 1206.50 | 331.23  |         | 314.21  | 3  | I        |
| A        | 13 | 1294.57 | 1276.56 | 1277.54 | 218.15  |         | 201.12  | 2  | A        |
| K        | 14 |         |         |         | 147.11  |         | 130.09  | 1  | K        |

B/Bris M1 235-245 unmodified

## QSSMGNSALVK

Charge: 2, Exp. m/z: 561.285, Calc. m/z: 561.287

Data File: D120713\_079, Scans: 8296 - 8296

Max Intensity: 1.23e+05

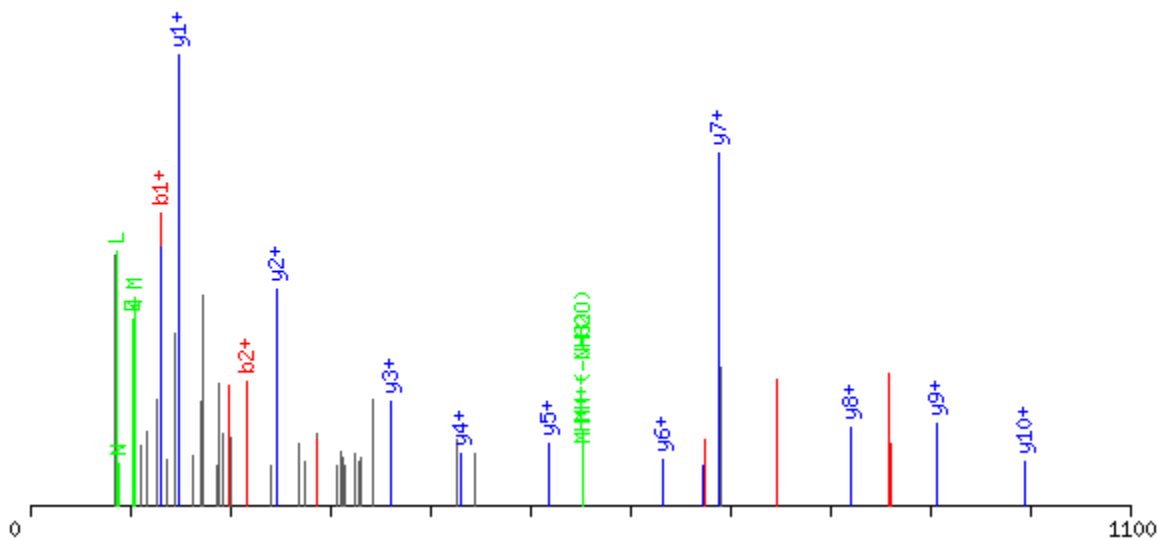

|   |    | b+     | -H2O   | -NH3   | y+     | -H2O   | -NH3   |    |   |
|---|----|--------|--------|--------|--------|--------|--------|----|---|
| Q | 1  | 129.07 |        |        |        |        |        | 11 | Q |
| S | 2  | 216.10 | 198.09 |        | 993.50 | 975.49 | 976.48 | 10 | S |
| S | 3  | 303.13 | 285.12 |        | 906.47 | 888.46 | 889.44 | 9  | S |
| M | 4  | 434.17 | 416.16 |        | 819.44 | 801.43 | 802.41 | 8  | M |
| G | 5  | 491.19 | 473.18 |        | 688.40 | 670.39 | 671.37 | 7  | G |
| N | 6  | 605.23 | 587.22 | 588.21 | 631.38 | 613.37 | 614.35 | 6  | N |
| S | 7  | 692.27 | 674.26 | 675.24 | 517.33 | 499.32 | 500.31 | 5  | S |
| A | 8  | 763.30 | 745.29 | 746.28 | 430.30 |        | 413.28 | 4  | A |
| L | 9  | 876.39 | 858.38 | 859.36 | 359.27 |        | 342.24 | 3  | L |
| V | 10 | 975.46 | 957.45 | 958.43 | 246.18 |        | 229.15 | 2  | V |
| K | 11 |        |        |        | 147.11 |        | 130.09 | 1  | K |

**B/Bris M1 235-245 phospho**

### QSS(+79.97)MGNSALVK

Charge: 2, Exp. m/z: 601.270, Calc. m/z: 601.272  
 Data File: D120713\_079, Scans: 8879 - 8879

Max Intensity: 3.11e+04

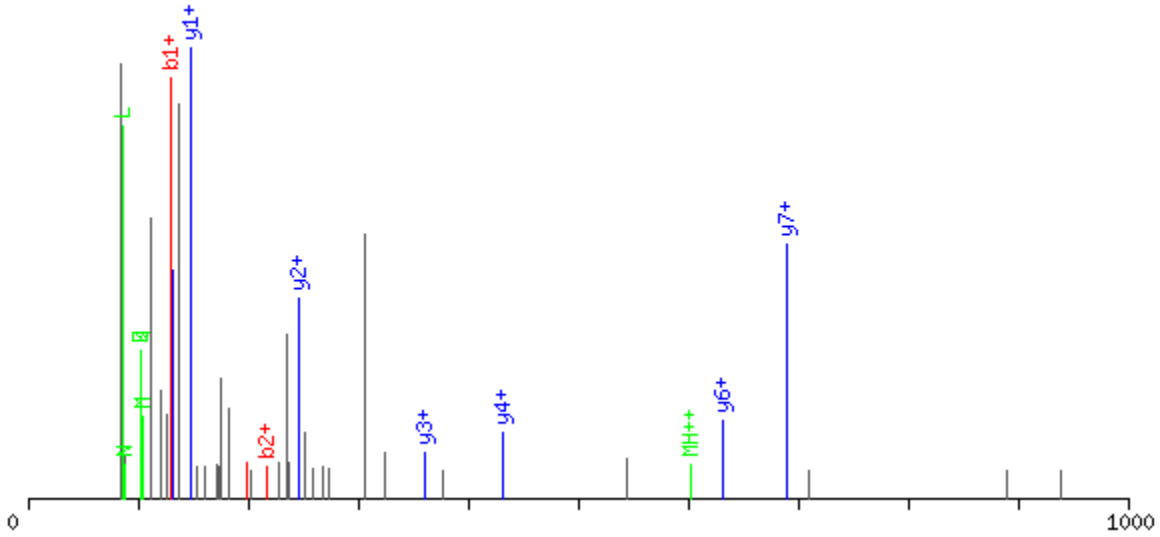

|          |    | b+      | -H2O    | -NH3    | y+      | -H2O    | -NH3    |    |          |
|----------|----|---------|---------|---------|---------|---------|---------|----|----------|
| Q        | 1  | 129.07  |         |         |         |         |         | 11 | Q        |
| S        | 2  | 216.10  | 198.09  |         | 1073.47 | 1055.46 | 1056.44 | 10 | S        |
| <u>S</u> | 3  | 383.10  | 365.09  |         | 986.44  | 968.43  | 969.41  | 9  | <u>S</u> |
| M        | 4  | 514.14  | 496.13  |         | 819.44  | 801.43  | 802.41  | 8  | M        |
| G        | 5  | 571.16  | 553.15  |         | 688.40  | 670.39  | 671.37  | 7  | G        |
| N        | 6  | 685.20  | 667.19  | 668.17  | 631.38  | 613.37  | 614.35  | 6  | N        |
| S        | 7  | 772.23  | 754.22  | 755.21  | 517.33  | 499.32  | 500.31  | 5  | S        |
| A        | 8  | 843.27  | 825.26  | 826.24  | 430.30  |         | 413.28  | 4  | A        |
| L        | 9  | 956.35  | 938.34  | 939.33  | 359.27  |         | 342.24  | 3  | L        |
| V        | 10 | 1055.42 | 1037.41 | 1038.40 | 246.18  |         | 229.15  | 2  | V        |
| K        | 11 |         |         |         | 147.11  |         | 130.09  | 1  | K        |
